# Supplementary material for: Identification of miR-145 targets through an integrated omics analysis
Source: Royal Society of Chemistry journal article supplement (doi:10.1039/c4mb00585f), 2014-10-23
Supplement: c4mb00585f2.xlsx [file c4mb00585f2.xlsx]

## Sheet: dge_nr
probeID	ENTREZID	SYMBOL	GENENAME	UNIGENE	ENSEMBL	ProbeName	Description	log2FC	FC	AveExpr	t	P.Value	adj.P.Val	B
37727	2914	GRM4	glutamate receptor, metabotropic 4	Hs.654847	ENSG00000124493	A_23_P70588	ref|Homo sapiens glutamate receptor, metabotropic 4 (GRM4), mRNA [NM_000841]	-2.31876	0.20044	6.1946	-6.53755	0.000260217	0.00177667	0.230604
37889	153478	PLEKHG4B	pleckstrin homology domain containing, family G (with RhoGef domain) member 4B	Hs.535800	ENSG00000153404	A_23_P81640	ref|Homo sapiens pleckstrin homology domain containing, family G (with RhoGef domain) member 4B (PLEKHG4B), mRNA [NM_052909]	-2.24679	0.210692	6.21523	-6.99712	0.000167942	0.00129712	0.713334
38052	1109	AKR1C4	aldo-keto reductase family 1, member C4 (chlordecone reductase; 3-alpha hydroxysteroid dehydrogenase, type I; dihydrodiol dehydrogenase 4)	Hs.567245	ENSG00000198610	A_23_P149926	ref|Homo sapiens aldo-keto reductase family 1, member C4 (chlordecone reductase; 3-alpha hydroxysteroid dehydrogenase, type I; dihydrodiol dehydrogenase 4) (AKR1C4), mRNA [NM_001818]	-1.64818	0.319043	5.60472	-7.20166	0.000139179	0.00112884	0.920497
3559	5420	PODXL	podocalyxin-like	Hs.16426	ENSG00000128567	A_23_P215060	ref|Homo sapiens podocalyxin-like (PODXL), transcript variant 1, mRNA [NM_001018111]	-1.59964	0.329958	13.3963	-64.7116	2.05e-11	1.21e-07	15.778
38383	4103	MAGEA4	melanoma antigen family A, 4	Hs.37107	ENSG00000147381	A_24_P185945	ref|Homo sapiens melanoma antigen family A, 4 (MAGEA4), transcript variant 2, mRNA [NM_002362]	-1.5335	0.345438	5.58991	-6.66316	0.000230347	0.00162819	0.364982
37479	139324	HDX	highly divergent homeobox	Hs.559546	ENSG00000165259	A_23_P386364	ref|Homo sapiens highly divergent homeobox (HDX), mRNA [NM_144657]	-1.41673	0.37456	6.12744	-5.68278	0.000626206	0.00340167	-0.735889
38217	22801	ITGA11	integrin, alpha 11	Hs.436416	ENSG00000137809	A_23_P206022	ref|Homo sapiens integrin, alpha 11 (ITGA11), mRNA [NM_001004439]	-1.36281	0.388824	5.93815	-6.26217	0.000342063	0.00217236	-0.0706669
38134	151	ADRA2B	adrenergic, alpha-2B-, receptor	Hs.247686	ENSG00000222040	A_23_P378926	ref|Homo sapiens adrenergic, alpha-2B-, receptor (ADRA2B), mRNA [NM_000682]	-1.35014	0.392255	5.92139	-7.04857	0.000160127	0.00125125	0.765877
13893	58527	C6orf115	chromosome 6 open reading frame 115	Hs.600861	ENSG00000146386	A_32_P160972	ref|Homo sapiens chromosome 6 open reading frame 115 (C6orf115), mRNA [NM_021243]	-1.22504	0.427784	8.22393	-57.1555	5.12e-11	1.71e-07	15.242
38218	100506863	CLTC-IT1	CLTC intronic transcript 1 (non-protein coding)	Hs.676463	NA	A_23_P49686	gb|Homo sapiens clone HQ0456 PRO0456 mRNA, complete cds. [AF090926]	-1.15946	0.44768	6.90504	-5.9103	0.000491432	0.0028318	-0.469451
38796	22795	NID2	nidogen 2 (osteonidogen)	Hs.369840	ENSG00000087303	A_23_P163087	ref|Homo sapiens nidogen 2 (osteonidogen) (NID2), mRNA [NM_007361]	-1.05011	0.48293	5.40931	-6.51101	0.000267067	0.00181004	0.201975
30208	56951	C5orf15	chromosome 5 open reading frame 15	NA	ENSG00000113583	A_23_P81650	ref|Homo sapiens chromosome 5 open reading frame 15 (C5orf15), mRNA [NM_020199]	-0.982441	0.506123	10.0982	-47.1645	2.1e-10	5.68e-07	14.2892
36815	445341	TNAP	TRAFs and NIK-associated protein	Hs.687024	NA	A_24_P376070	gb|Homo sapiens NIK-associated protein mRNA, complete cds. [AF463496]	-0.934413	0.523255	5.27962	-5.91933	0.000486792	0.00281177	-0.459017
15536	79627	OGFRL1	opioid growth factor receptor-like 1	Hs.648434, Hs.656091	ENSG00000119900	A_23_P7791	ref|Homo sapiens opioid growth factor receptor-like 1 (OGFRL1), mRNA [NM_024576]	-0.919868	0.528558	10.373	-39.3736	7.88e-10	1.12e-06	13.2666
38549	205147	FAM123C	family with sequence similarity 123C	Hs.369289	ENSG00000178171	A_24_P34568	ref|Homo sapiens family with sequence similarity 123C (FAM123C), transcript variant 1, mRNA [NM_152698]	-0.911017	0.53181	5.70801	-6.85559	0.00019173	0.0014319	0.567271
42292	51196	PLCE1	phospholipase C, epsilon 1	Hs.655033	ENSG00000138193	A_23_P35617	ref|Homo sapiens phospholipase C, epsilon 1 (PLCE1), mRNA [NM_016341]	-0.896936	0.537026	7.97406	-36.3377	1.42e-09	1.41e-06	12.7766
40139	29968	PSAT1	phosphoserine aminotransferase 1	Hs.494261	ENSG00000135069	A_23_P259692	ref|Homo sapiens phosphoserine aminotransferase 1 (PSAT1), transcript variant 1, mRNA [NM_058179]	-0.894297	0.538009	9.08957	-41.656	5.21e-10	1.08e-06	13.5981
10322	745	C11orf9	chromosome 11 open reading frame 9	Hs.473109	ENSG00000124920	A_23_P75790	ref|Homo sapiens chromosome 11 open reading frame 9 (C11orf9), transcript variant 1, mRNA [NM_013279]	-0.873715	0.54574	8.46151	-35.1373	1.81e-09	1.64e-06	12.5656
19022	5625	PRODH	proline dehydrogenase (oxidase) 1	Hs.517352	ENSG00000100033	A_23_P68786	ref|Homo sapiens proline dehydrogenase (oxidase) 1 (PRODH), nuclear gene encoding mitochondrial protein, mRNA [NM_016335]	-0.860203	0.550875	8.85533	-39.5645	7.61e-10	1.12e-06	13.2954
27736	2653	GCSH	glycine cleavage system protein H (aminomethyl carrier)	Hs.546256	ENSG00000140905	A_23_P117933	ref|Homo sapiens glycine cleavage system protein H (aminomethyl carrier) (GCSH), mRNA [NM_004483]	-0.834584	0.560745	11.0344	-32.2651	3.39e-09	2.59e-06	12.0154
29936	80099	C7orf69	chromosome 7 open reading frame 69	Hs.287647	ENSG00000136275	A_23_P168368	ref|Homo sapiens hypothetical protein FLJ21075 (FLJ21075), mRNA [NM_025031]	-0.830868	0.562191	11.8769	-40.1249	6.86e-10	1.12e-06	13.379
33780	4697	NDUFA4	NADH dehydrogenase (ubiquinone) 1 alpha subcomplex, 4, 9kDa	Hs.50098	ENSG00000189043	A_32_P98313	ref|Homo sapiens NADH dehydrogenase (ubiquinone) 1 alpha subcomplex, 4, 9kDa (NDUFA4), nuclear gene encoding mitochondrial protein, mRNA [NM_002489]	-0.826705	0.563815	11.8897	-36.9605	1.25e-09	1.36e-06	12.8821
37311	132014	IL17RE	interleukin 17 receptor E	Hs.390823	ENSG00000163701	A_23_P500206	ref|Homo sapiens interleukin 17 receptor E (IL17RE), transcript variant 5, mRNA [NM_153483]	-0.824583	0.564645	7.12316	-7.66122	9.26e-05	0.000844337	1.36967
19838	27102	EIF2AK1	eukaryotic translation initiation factor 2-alpha kinase 1	Hs.728827	ENSG00000086232	A_23_P251173	ref|Homo sapiens eukaryotic translation initiation factor 2-alpha kinase 1 (EIF2AK1), transcript variant 1, mRNA [NM_014413]	-0.814959	0.568425	9.4163	-31.742	3.82e-09	2.63e-06	11.9077
38710	92960	PEX11G	peroxisomal biogenesis factor 11 gamma	Hs.515100	ENSG00000104883	A_23_P321466	ref|Homo sapiens peroxisomal biogenesis factor 11 gamma (PEX11G), mRNA [NM_080662]	-0.81379	0.568885	6.00859	-8.12511	6.26e-05	0.000643296	1.80157
8296	5049	PAFAH1B2	platelet-activating factor acetylhydrolase 1b, catalytic subunit 2 (30kDa)	Hs.597488	ENSG00000168092	A_23_P255503	ref|Homo sapiens platelet-activating factor acetylhydrolase, isoform Ib, beta subunit 30kDa (PAFAH1B2), mRNA [NM_002572]	-0.798198	0.575067	10.5799	-34.7516	1.97e-09	1.67e-06	12.4955
10071	2519	FUCA2	fucosidase, alpha-L- 2, plasma	Hs.17680	ENSG00000001036	A_23_P145408	ref|Homo sapiens fucosidase, alpha-L- 2, plasma (FUCA2), mRNA [NM_032020]	-0.788327	0.579015	10.554	-30.7994	4.76e-09	2.99e-06	11.7073
38384	7014	TERF2	telomeric repeat binding factor 2	Hs.63335	ENSG00000132604	A_23_P417200	ref|Homo sapiens telomeric repeat binding factor 2 (TERF2), mRNA [NM_005652]	-0.787704	0.579265	7.23573	-7.13504	0.000147893	0.00118162	0.853524
40018	3866	KRT15	keratin 15	Hs.654570	ENSG00000171346	A_23_P27133	ref|Homo sapiens keratin 15 (KRT15), mRNA [NM_002275]	-0.776396	0.583823	10.1609	-29.3767	6.72e-09	3.6e-06	11.3883
21863	3460	IFNGR2	interferon gamma receptor 2 (interferon gamma transducer 1)	Hs.634632	ENSG00000159128	A_23_P29036	ref|Homo sapiens interferon gamma receptor 2 (interferon gamma transducer 1) (IFNGR2), mRNA [NM_005534]	-0.730758	0.602587	9.62657	-26.3608	1.48e-08	5.14e-06	10.6389
39453	286756	SCAMPER	sphingolipid Ca2+ release mediating protein of endoplasmic reticulum	NA	NA	A_24_P216453	gb|Homo sapiens SCAMPER mRNA, complete cds. [AY163814]	-0.725369	0.604842	5.12747	-7.12103	0.000149802	0.00119271	0.839378
37059	253190	SERHL2	serine hydrolase-like 2	Hs.728995	ENSG00000183569	A_23_P120953	ref|Homo sapiens serine hydrolase-like 2 (SERHL2), mRNA [NM_014509]	-0.72251	0.606042	7.88673	-8.00918	6.89e-05	0.00069023	1.69558
3780	8795	TNFRSF10B	tumor necrosis factor receptor superfamily, member 10b	Hs.521456	ENSG00000120889	A_24_P218265	ref|Homo sapiens tumor necrosis factor receptor superfamily, member 10b (TNFRSF10B), transcript variant 1, mRNA [NM_003842]	-0.719175	0.607445	10.6558	-22.4973	4.7e-08	8.94e-06	9.50258
39050	6624	FSCN1	fascin homolog 1, actin-bundling protein (Strongylocentrotus purpuratus)	Hs.118400	ENSG00000075618	A_23_P168531	ref|Homo sapiens fascin homolog 1, actin-bundling protein (Strongylocentrotus purpuratus) (FSCN1), mRNA [NM_003088]	-0.708915	0.61178	5.70369	-24.6145	2.44e-08	6.5e-06	10.1527
29915	10613	ERLIN1	ER lipid raft associated 1	Hs.150087	ENSG00000107566	A_23_P52219	ref|Homo sapiens ER lipid raft associated 1 (ERLIN1), mRNA [NM_006459]	-0.708613	0.611908	7.94782	-32.1062	3.51e-09	2.59e-06	11.983
139	80307	FER1L4	fer-1-like 4 (C. elegans) pseudogene	Hs.72222	NA	A_24_P228611	ref|Homo sapiens fer-1-like 4 (C. elegans) (FER1L4), non-coding RNA [NR_024377]	-0.702352	0.614569	6.89898	-16.4297	4.56e-07	3.03e-05	7.15316
20993	127933	UHMK1	U2AF homology motif (UHM) kinase 1	Hs.127310	ENSG00000152332	A_23_P342067	ref|Homo sapiens U2AF homology motif (UHM) kinase 1 (UHMK1), mRNA [NM_175866]	-0.69405	0.618116	7.93046	-13.8105	1.58e-06	6.19e-05	5.8258
16312	55770	EXOC2	exocyst complex component 2	Hs.484412	ENSG00000112685	A_23_P214354	ref|Homo sapiens exocyst complex component 2 (EXOC2), mRNA [NM_018303]	-0.683148	0.622805	6.88798	-19.7767	1.2e-07	1.52e-05	8.55121
37423	2764	GMFB	glia maturation factor, beta	Hs.151413	ENSG00000197045	A_23_P205611	ref|Homo sapiens glia maturation factor, beta (GMFB), mRNA [NM_004124]	-0.682694	0.623001	7.37107	-16.2423	4.95e-07	3.16e-05	7.06588
39450	338322	NLRP10	NLR family, pyrin domain containing 10	Hs.449636	ENSG00000182261	A_23_P403488	ref|Homo sapiens NLR family, pyrin domain containing 10 (NLRP10), mRNA [NM_176821]	-0.679597	0.62434	5.08665	-8.15133	6.13e-05	0.000633307	1.82537
13813	57552	NCEH1	neutral cholesterol ester hydrolase 1	Hs.444099	ENSG00000144959	A_23_P132644	ref|Homo sapiens arylacetamide deacetylase-like 1 (AADACL1), mRNA [NM_020792]	-0.664158	0.631057	10.1405	-30.3198	5.34e-09	3.17e-06	11.602
25739	164	AP1G1	adaptor-related protein complex 1, gamma 1 subunit	Hs.461253	ENSG00000166747	A_23_P318208	ref|Homo sapiens adaptor-related protein complex 1, gamma 1 subunit (AP1G1), transcript variant 1, mRNA [NM_001030007]	-0.655309	0.63494	8.87166	-27.0991	1.21e-08	4.73e-06	10.8324
39768	83440	ADPGK	ADP-dependent glucokinase	NA	ENSG00000159322	A_23_P14716	ref|Homo sapiens ADP-dependent glucokinase (ADPGK), transcript variant 1, mRNA [NM_031284]	-0.653326	0.635813	7.42695	-30.6338	4.95e-09	3.07e-06	11.6712
33878	9770	RASSF2	Ras association (RalGDS/AF-6) domain family member 2	Hs.631504	ENSG00000101265	A_23_P166087	ref|Homo sapiens Ras association (RalGDS/AF-6) domain family member 2 (RASSF2), transcript variant 1, mRNA [NM_014737]	-0.652628	0.63612	7.12797	-26.9469	1.26e-08	4.8e-06	10.793
6970	2589	GALNT1	UDP-N-acetyl-alpha-D-galactosamine:polypeptide N-acetylgalactosaminyltransferase 1 (GalNAc-T1)	Hs.514806	ENSG00000141429	A_23_P306105	ref|Homo sapiens UDP-N-acetyl-alpha-D-galactosamine:polypeptide N-acetylgalactosaminyltransferase 1 (GalNAc-T1) (GALNT1), mRNA [NM_020474]	-0.651837	0.636469	8.05633	-22.4023	4.84e-08	9.06e-06	9.4717
23607	4893	NRAS	neuroblastoma RAS viral (v-ras) oncogene homolog	Hs.486502	ENSG00000213281	A_23_P63190	ref|Homo sapiens neuroblastoma RAS viral (v-ras) oncogene homolog (NRAS), mRNA [NM_002524]	-0.648866	0.637781	7.64939	-27.0385	1.23e-08	4.73e-06	10.8167
31887	56674	TMEM9B	TMEM9 domain family, member B	Hs.501853	ENSG00000175348	A_24_P398319	ref|Homo sapiens TMEM9 domain family, member B (TMEM9B), mRNA [NM_020644]	-0.648405	0.637985	7.80476	-27.8445	9.94e-09	4.44e-06	11.0209
39370	8499	PPFIA2	protein tyrosine phosphatase, receptor type, f polypeptide (PTPRF), interacting protein (liprin), alpha 2	Hs.506216	ENSG00000139220	A_23_P402936	ref|Homo sapiens protein tyrosine phosphatase, receptor type, f polypeptide (PTPRF), interacting protein (liprin), alpha 2 (PPFIA2), mRNA [NM_003625]	-0.648167	0.638091	5.21747	-6.19792	0.00036506	0.00228069	-0.142315
13728	7525	YES1	v-yes-1 Yamaguchi sarcoma viral oncogene homolog 1	Hs.194148	ENSG00000176105	A_24_P48403	ref|Homo sapiens v-yes-1 Yamaguchi sarcoma viral oncogene homolog 1 (YES1), mRNA [NM_005433]	-0.647747	0.638276	9.47031	-30.0531	5.69e-09	3.29e-06	11.5425
6407	8996	NOL3	nucleolar protein 3 (apoptosis repressor with CARD domain)	Hs.513667	ENSG00000140939	A_23_P206371	ref|Homo sapiens nucleolar protein 3 (apoptosis repressor with CARD domain) (NOL3), mRNA [NM_003946]	-0.647701	0.638296	11.2496	-17.6742	2.69e-07	2.25e-05	7.70695
12003	84958	SYTL1	synaptotagmin-like 1	Hs.469175	ENSG00000142765	A_23_P46390	ref|Homo sapiens synaptotagmin-like 1 (SYTL1), mRNA [NM_032872]	-0.645661	0.6392	8.73813	-18.5778	1.88e-07	1.89e-05	8.08286
8186	10371	SEMA3A	sema domain, immunoglobulin domain (Ig), short basic domain, secreted, (semaphorin) 3A	Hs.252451	ENSG00000075213	A_23_P317591	ref|Homo sapiens sema domain, immunoglobulin domain (Ig), short basic domain, secreted, (semaphorin) 3A (SEMA3A), mRNA [NM_006080]	-0.642915	0.640418	11.2097	-25.8542	1.71e-08	5.59e-06	10.5022
39866	5669	PSG1	pregnancy specific beta-1-glycoprotein 1	Hs.709192	ENSG00000231924	A_23_P50697	ref|Homo sapiens pregnancy specific beta-1-glycoprotein 1 (PSG1), mRNA [NM_006905]	-0.637989	0.642608	5.07342	-6.83445	0.000195597	0.0014527	0.545254
21608	728537	LOC728537	hypothetical LOC728537	Hs.469369	NA	A_24_P456723	gb|Homo sapiens cDNA clone IMAGE:5271446. [BC039374]	-0.637421	0.642861	7.99071	-29.6145	6.34e-09	3.48e-06	11.4431
21859	51060	TXNDC12	thioredoxin domain containing 12 (endoplasmic reticulum)	Hs.476033	ENSG00000117862	A_23_P200199	ref|Homo sapiens thioredoxin domain containing 12 (endoplasmic reticulum) (TXNDC12), mRNA [NM_015913]	-0.633037	0.644817	10.3524	-28.031	9.46e-09	4.37e-06	11.067
38215	100288798	LOC100288798	hypothetical LOC100288798	Hs.525922, Hs.729166, Hs.730135	NA	A_24_P393496	gb|Homo sapiens cDNA clone IMAGE:3961179, partial cds. [BC014370]	-0.631911	0.645321	6.31433	-6.12441	0.000393505	0.00240825	-0.224918
40191	51071	DERA	deoxyribose-phosphate aldolase (putative)	Hs.39429	ENSG00000023697	A_23_P25253	ref|Homo sapiens 2-deoxyribose-5-phosphate aldolase homolog (C. elegans) (DERA), mRNA [NM_015954]	-0.628974	0.646636	10.7923	-29.4844	6.54e-09	3.55e-06	11.4132
34598	8323	FZD6	frizzled family receptor 6	Hs.591863, Hs.676099	ENSG00000164930	A_23_P123276	ref|Homo sapiens frizzled homolog 6 (Drosophila) (FZD6), mRNA [NM_003506]	-0.625019	0.648411	7.97162	-14.4578	1.14e-06	5.05e-05	6.17683
42756	4166	CHST6	carbohydrate (N-acetylglucosamine 6-O) sulfotransferase 6	Hs.655622	ENSG00000183196	A_23_P106922	ref|Homo sapiens carbohydrate (N-acetylglucosamine 6-O) sulfotransferase 6 (CHST6), mRNA [NM_021615]	-0.620873	0.650277	7.16161	-21.2741	7.05e-08	1.13e-05	9.09247
41055	865	CBFB	core-binding factor, beta subunit	Hs.460988	ENSG00000067955	A_23_P113634	ref|Homo sapiens core-binding factor, beta subunit (CBFB), transcript variant 2, mRNA [NM_001755]	-0.617597	0.651755	10.4816	-25.4265	1.93e-08	5.95e-06	10.384
37642	6843	VAMP1	vesicle-associated membrane protein 1 (synaptobrevin 1)	Hs.20021	ENSG00000139190	A_23_P105545	ref|Homo sapiens vesicle-associated membrane protein 1 (synaptobrevin 1) (VAMP1), transcript variant 3, mRNA [NM_016830]	-0.615662	0.65263	6.92999	-6.1055	0.000401214	0.00243979	-0.246274
42203	23371	TENC1	tensin like C1 domain containing phosphatase (tensin 2)	Hs.343334, Hs.6147	ENSG00000111077	A_23_P151297	ref|Homo sapiens tensin like C1 domain containing phosphatase (tensin 2) (TENC1), transcript variant 1, mRNA [NM_015319]	-0.610267	0.655075	7.14152	-20.9695	7.82e-08	1.2e-05	8.98602
32100	22920	KIFAP3	kinesin-associated protein 3	Hs.433442	ENSG00000075945	A_23_P62920	ref|Homo sapiens kinesin-associated protein 3 (KIFAP3), mRNA [NM_014970]	-0.606479	0.656798	8.95113	-29.0563	7.28e-09	3.8e-06	11.3136
38881	119437	CTAGE7P	CTAGE family, member 7, pseudogene	Hs.620802	NA	A_23_P348936	gb|Homo sapiens CTAGE family pseudogene, mRNA (cDNA clone IMAGE:5270059). [BC036527]	-0.602337	0.658686	5.08642	-8.31642	5.35e-05	0.000577191	1.97377
35487	566	AZU1	azurocidin 1	Hs.72885	ENSG00000172232	A_23_P153741	ref|Homo sapiens azurocidin 1 (AZU1), mRNA [NM_001700]	-0.597831	0.660747	8.26227	-22.1172	5.31e-08	9.36e-06	9.37803
38051	5564	PRKAB1	protein kinase, AMP-activated, beta 1 non-catalytic subunit	Hs.726001	ENSG00000111725	A_23_P204503	ref|Homo sapiens protein kinase, AMP-activated, beta 1 non-catalytic subunit (PRKAB1), mRNA [NM_006253]	-0.594557	0.662248	7.07484	-6.66189	0.000230628	0.00162927	0.36364
32085	9170	LPAR2	lysophosphatidic acid receptor 2	Hs.122575	ENSG00000064547	A_23_P101829	ref|Homo sapiens lysophosphatidic acid receptor 2 (LPAR2), mRNA [NM_004720]	-0.593445	0.662758	10.3864	-23.7172	3.2e-08	7.39e-06	9.88584
42608	54760	PCSK4	proprotein convertase subtilisin/kexin type 4	Hs.46884	ENSG00000115257	A_23_P16648	ref|Homo sapiens proprotein convertase subtilisin/kexin type 4 (PCSK4), mRNA [NM_017573]	-0.593199	0.662871	9.0793	-16.5405	4.34e-07	2.95e-05	7.20428
32726	275	AMT	aminomethyltransferase	Hs.102	ENSG00000145020	A_24_P174503	ref|Homo sapiens aminomethyltransferase (AMT), mRNA [NM_000481]	-0.589986	0.664349	8.54812	-26.8781	1.29e-08	4.85e-06	10.7752
34653	5226	PGD	phosphogluconate dehydrogenase	Hs.464071	ENSG00000142657	A_23_P126623	ref|Homo sapiens phosphogluconate dehydrogenase (PGD), mRNA [NM_002631]	-0.589782	0.664443	10.4194	-25.2509	2.03e-08	5.98e-06	10.3348
5539	6868	ADAM17	ADAM metallopeptidase domain 17	Hs.404914	ENSG00000151694	A_23_P143120	ref|Homo sapiens ADAM metallopeptidase domain 17 (ADAM17), mRNA [NM_003183]	-0.587971	0.665278	9.73224	-24.2844	2.69e-08	6.99e-06	10.056
36896	157860	LOC157860	hypothetical protein LOC157860	Hs.170296	NA	A_24_P751220	gb|Homo sapiens cDNA: FLJ22090 fis, clone HEP16084. [AK025743]	-0.585711	0.666321	5.1284	-6.9925	0.000168664	0.00130126	0.708602
8842	7089	TLE2	transducin-like enhancer of split 2 (E(sp1) homolog, Drosophila)	Hs.332173	ENSG00000065717	A_23_P153676	ref|Homo sapiens transducin-like enhancer of split 2 (E(sp1) homolog, Drosophila) (TLE2), mRNA [NM_003260]	-0.585192	0.66656	9.36063	-26.7913	1.32e-08	4.88e-06	10.7525
21824	780	DDR1	discoidin domain receptor tyrosine kinase 1	Hs.631988	ENSG00000229767, ENSG00000234078, ENSG00000215522, ENSG00000223680, ENSG00000204580, ENSG00000137332, ENSG00000230456	A_23_P93311	ref|Homo sapiens discoidin domain receptor tyrosine kinase 1 (DDR1), transcript variant 1, mRNA [NM_013993]	-0.580593	0.668689	7.50014	-12.932	2.52e-06	8.09e-05	5.32172
12555	79844	ZDHHC11	zinc finger, DHHC-type containing 11	Hs.729226	ENSG00000188818	A_23_P256008	ref|Homo sapiens zinc finger, DHHC-type containing 11 (ZDHHC11), mRNA [NM_024786]	-0.57914	0.669363	11.7353	-11.7646	4.9e-06	0.0001223	4.5965
20744	3753	KCNE1	potassium voltage-gated channel, Isk-related family, member 1	Hs.121495	ENSG00000180509	A_23_P154855	ref|Homo sapiens potassium voltage-gated channel, Isk-related family, member 1 (KCNE1), transcript variant 2, mRNA [NM_000219]	-0.578018	0.669883	6.46754	-14.6004	1.06e-06	4.89e-05	6.25197
17949	286254	LOC286254	hypothetical protein LOC286254	Hs.635171	NA	A_32_P220078	gb|Homo sapiens cDNA FLJ35432 fis, clone SMINT2002311. [AK092751]	-0.563664	0.676582	8.68014	-15.2164	7.9e-07	4.11e-05	6.56812
4824	80146	UXS1	UDP-glucuronate decarboxylase 1	NA	ENSG00000115652	A_23_P67829	ref|Homo sapiens UDP-glucuronate decarboxylase 1 (UXS1), mRNA [NM_025076]	-0.562685	0.677041	8.74448	-23.7846	3.13e-08	7.35e-06	9.90629
29988	644936	LOC644936	actin, beta pseudogene	Hs.627173	NA	A_24_P238744	ref|Homo sapiens cytoplasmic beta-actin pseudogene (LOC644936), non-coding RNA [NR_004845]	-0.562598	0.677082	14.9854	-13.3813	1.97e-06	7.03e-05	5.58371
39699	440330	LOC440330	hypothetical protein LOC440330	Hs.121180	NA	A_32_P351277	gb|Homo sapiens, clone IMAGE:3543963, mRNA. [BC004968]	-0.562429	0.677161	5.19825	-7.59497	9.81e-05	0.000879521	1.30626
24976	5530	PPP3CA	protein phosphatase 3, catalytic subunit, alpha isozyme	Hs.435512	ENSG00000138814	A_32_P12344	gb|BU618279 UI-H-FH1-bfh-m-09-0-UI.s1 NCI_CGAP_FH1 Homo sapiens cDNA clone UI-H-FH1-bfh-m-09-0-UI 3', mRNA sequence [BU618279]	-0.560042	0.678282	7.46317	-20.5675	9e-08	1.29e-05	8.84275
35162	10067	SCAMP3	secretory carrier membrane protein 3	Hs.200600	ENSG00000255954, ENSG00000116521	A_23_P97274	ref|Homo sapiens secretory carrier membrane protein 3 (SCAMP3), transcript variant 2, mRNA [NM_052837]	-0.559809	0.678392	9.40807	-17.8359	2.52e-07	2.16e-05	7.77577
13126	112476	PRRT2	proline-rich transmembrane protein 2	Hs.655071	ENSG00000167371	A_23_P66017	ref|Homo sapiens proline-rich transmembrane protein 2 (PRRT2), mRNA [NM_145239]	-0.555223	0.680552	7.86741	-14.8978	9.19e-07	4.48e-05	6.40633
24404	4485	MST1	macrophage stimulating 1 (hepatocyte growth factor-like)	Hs.349110, Hs.512587	ENSG00000173531	A_24_P148796	ref|Homo sapiens macrophage stimulating 1 (hepatocyte growth factor-like) (MST1), mRNA [NM_020998]	-0.55335	0.681436	10.5765	-18.6206	1.85e-07	1.88e-05	8.10016
12527	84687	PPP1R9B	protein phosphatase 1, regulatory (inhibitor) subunit 9B	Hs.514323	NA	A_24_P376309	ref|Homo sapiens protein phosphatase 1, regulatory (inhibitor) subunit 9B (PPP1R9B), mRNA [NM_032595]	-0.551602	0.682262	9.16063	-25.3303	1.98e-08	5.98e-06	10.3571
34518	432	ASGR1	asialoglycoprotein receptor 1	Hs.12056	ENSG00000141505	A_23_P118722	ref|Homo sapiens asialoglycoprotein receptor 1 (ASGR1), mRNA [NM_001671]	-0.547044	0.684421	9.65998	-25.6189	1.82e-08	5.78e-06	10.4375
32295	6300	MAPK12	mitogen-activated protein kinase 12	Hs.432642	ENSG00000188130	A_23_P29347	ref|Homo sapiens mitogen-activated protein kinase 12 (MAPK12), mRNA [NM_002969]	-0.546454	0.684701	8.34116	-16.3628	4.69e-07	3.07e-05	7.12211
9756	84069	PLEKHN1	pleckstrin homology domain containing, family N member 1	Hs.528691	ENSG00000187583	A_23_P23616	ref|Homo sapiens pleckstrin homology domain containing, family N member 1 (PLEKHN1), mRNA [NM_032129]	-0.544025	0.685855	7.5626	-19.9344	1.13e-07	1.47e-05	8.61041
18784	83933	HDAC10	histone deacetylase 10	Hs.26593	ENSG00000100429	A_23_P368740	ref|Homo sapiens histone deacetylase 10 (HDAC10), mRNA [NM_032019]	-0.542681	0.686494	7.47599	-24.1154	2.83e-08	7.15e-06	10.0058
5203	404636	FAM45A	family with sequence similarity 45, member A	NA	ENSG00000119979	A_32_P138004	ref|Homo sapiens family with sequence similarity 45, member A (FAM45A), mRNA [NM_207009]	-0.542389	0.686633	8.96559	-23.1928	3.76e-08	8.1e-06	9.72408
38768	164832	LONRF2	LON peptidase N-terminal domain and ring finger 2	Hs.21380	ENSG00000170500	A_32_P190303	ref|Homo sapiens LON peptidase N-terminal domain and ring finger 2 (LONRF2), mRNA [NM_198461]	-0.541213	0.687193	11.0199	-23.0707	3.91e-08	8.33e-06	9.68577
17336	80726	KIAA1683	KIAA1683	Hs.313471	ENSG00000130518	A_23_P130974	ref|Homo sapiens KIAA1683 (KIAA1683), mRNA [NM_025249]	-0.535847	0.689754	9.40493	-16.8351	3.82e-07	2.75e-05	7.33843
22242	401251	C6orf26	chromosome 6 open reading frame 26	Hs.371225	ENSG00000227861, ENSG00000228727, ENSG00000237918, ENSG00000229176, ENSG00000234951, ENSG00000227074	A_24_P3804	ref|Homo sapiens chromosome 6 open reading frame 26 (C6orf26), mRNA [NM_001039651]	-0.5347	0.690302	9.40144	-22.8433	4.2e-08	8.48e-06	9.61378
29061	11345	GABARAPL2	GABA(A) receptor-associated protein-like 2	Hs.461379	ENSG00000034713	A_24_P356338	ref|Homo sapiens GABA(A) receptor-associated protein-like 2 (GABARAPL2), mRNA [NM_007285]	-0.533736	0.690763	8.05144	-18.5982	1.86e-07	1.89e-05	8.09113
18003	3678	ITGA5	integrin, alpha 5 (fibronectin receptor, alpha polypeptide)	Hs.505654	ENSG00000161638	A_23_P36562	ref|Homo sapiens integrin, alpha 5 (fibronectin receptor, alpha polypeptide) (ITGA5), mRNA [NM_002205]	-0.533422	0.690914	8.21118	-17.0663	3.47e-07	2.61e-05	7.44191
25098	9284	NPIP	nuclear pore complex interacting protein	Hs.676266	ENSG00000183426	A_32_P140823	ref|Homo sapiens nuclear pore complex interacting protein (NPIP), mRNA [NM_006985]	-0.53314	0.691049	14.3783	-15.2884	7.64e-07	4.05e-05	6.60419
37970	54913	RPP25	ribonuclease P/MRP 25kDa subunit	Hs.8562	ENSG00000178718	A_23_P3424	ref|Homo sapiens ribonuclease P/MRP 25kDa subunit (RPP25), mRNA [NM_017793]	-0.53181	0.691686	7.61394	-9.46341	2.23e-05	0.000323714	2.94032
450	154141	MBOAT1	membrane bound O-acyltransferase domain containing 1	Hs.377830	ENSG00000172197	A_23_P408996	ref|Homo sapiens membrane bound O-acyltransferase domain containing 1 (MBOAT1), mRNA [NM_001080480]	-0.530876	0.692134	6.51786	-20.7612	8.41e-08	1.26e-05	8.91219
20483	6242	RTKN	rhotekin	Hs.192854	ENSG00000114993	A_23_P120056	ref|Homo sapiens rhotekin (RTKN), transcript variant 2, mRNA [NM_033046]	-0.528155	0.693441	7.65442	-18.5857	1.87e-07	1.89e-05	8.08607
3621	25956	SEC31B	SEC31 homolog B (S. cerevisiae)	Hs.18889	ENSG00000075826	A_23_P35564	ref|Homo sapiens SEC31 homolog B (S. cerevisiae) (SEC31B), mRNA [NM_015490]	-0.527986	0.693522	10.2004	-23.9538	2.98e-08	7.35e-06	9.95738
1621	1942	EFNA1	ephrin-A1	Hs.516664	ENSG00000169242	A_23_P113005	ref|Homo sapiens ephrin-A1 (EFNA1), transcript variant 1, mRNA [NM_004428]	-0.522295	0.696264	8.85931	-20.561	9.02e-08	1.29e-05	8.84039
38709	204962	SLC44A5	solute carrier family 44, member 5	Hs.654821	ENSG00000137968	A_23_P342641	ref|Homo sapiens solute carrier family 44, member 5 (SLC44A5), transcript variant 1, mRNA [NM_152697]	-0.521804	0.6965	6.24268	-6.35402	0.000311945	0.00202984	0.0308461
5800	93611	FBXO44	F-box protein 44	Hs.556006	ENSG00000132879	A_23_P200637	ref|Homo sapiens F-box protein 44 (FBXO44), transcript variant 4, mRNA [NM_001014765]	-0.519214	0.697752	10.5904	-22.303	5e-08	9.16e-06	9.43923
33884	5092	PCBD1	pterin-4 alpha-carbinolamine dehydratase/dimerization cofactor of hepatocyte nuclear factor 1 alpha	Hs.3192	ENSG00000166228	A_23_P367405	ref|Homo sapiens pterin-4 alpha-carbinolamine dehydratase/dimerization cofactor of hepatocyte nuclear factor 1 alpha (PCBD1), mRNA [NM_000281]	-0.518363	0.698164	10.2416	-13.1798	2.2e-06	7.49e-05	5.46736
9744	6683	SPAST	spastin	Hs.468091	ENSG00000021574	A_23_P209356	ref|Homo sapiens spastin (SPAST), transcript variant 1, mRNA [NM_014946]	-0.515534	0.699534	7.46223	-17.3391	3.09e-07	2.44e-05	7.56213
18796	160518	DENND5B	DENN/MADD domain containing 5B	Hs.118166	ENSG00000170456	A_23_P366559	ref|Homo sapiens DENN/MADD domain containing 5B (DENND5B), mRNA [NM_144973]	-0.512063	0.701219	7.67881	-23.7637	3.15e-08	7.35e-06	9.89997
22185	5582	PRKCG	protein kinase C, gamma	Hs.631564	ENSG00000126583	A_23_P16189	ref|Homo sapiens protein kinase C, gamma (PRKCG), mRNA [NM_002739]	-0.509235	0.702595	6.57562	-23.8089	3.11e-08	7.35e-06	9.91367
31588	7127	TNFAIP2	tumor necrosis factor, alpha-induced protein 2	Hs.525607	ENSG00000185215	A_23_P421423	ref|Homo sapiens tumor necrosis factor, alpha-induced protein 2 (TNFAIP2), mRNA [NM_006291]	-0.507399	0.70349	11.4482	-18.9049	1.66e-07	1.78e-05	8.21393
24872	1513	CTSK	cathepsin K	Hs.632466	ENSG00000143387	A_23_P34744	ref|Homo sapiens cathepsin K (CTSK), mRNA [NM_000396]	-0.507206	0.703584	9.74778	-24.6233	2.43e-08	6.5e-06	10.1553
20444	60	ACTB	actin, beta	Hs.520640	ENSG00000075624	A_32_P137939	ref|Homo sapiens actin, beta (ACTB), mRNA [NM_001101]	-0.506838	0.703763	15.783	-6.02395	0.000436448	0.00259386	-0.338911
39451	55718	POLR3E	polymerase (RNA) III (DNA directed) polypeptide E (80kD)	Hs.460298	ENSG00000058600	A_23_P385529	gb|Homo sapiens mRNA for KIAA1452 protein, partial cds. [AB040885]	-0.50676	0.703801	5.5441	-4.65325	0.00204352	0.0083175	-2.03084
27077	5118	PCOLCE	procollagen C-endopeptidase enhancer	Hs.202097	ENSG00000106333	A_23_P251499	ref|Homo sapiens procollagen C-endopeptidase enhancer (PCOLCE), mRNA [NM_002593]	-0.505008	0.704656	8.7758	-22.7822	4.29e-08	8.55e-06	9.59432
30143	3014	H2AFX	H2A histone family, member X	Hs.477879	ENSG00000188486	A_24_P38895	ref|Homo sapiens H2A histone family, member X (H2AFX), mRNA [NM_002105]	-0.502032	0.706111	10.3372	-13.7933	1.59e-06	6.23e-05	5.81625
36980	8535	CBX4	chromobox homolog 4	NA	ENSG00000141582	A_23_P89621	ref|Homo sapiens chromobox homolog 4 (Pc class homolog, Drosophila) (CBX4), mRNA [NM_003655]	-0.500839	0.706696	6.7908	-6.06084	0.000420102	0.00252247	-0.296905
13148	6566	SLC16A1	solute carrier family 16, member 1 (monocarboxylic acid transporter 1)	Hs.75231	ENSG00000155380	A_23_P126825	ref|Homo sapiens solute carrier family 16, member 1 (monocarboxylic acid transporter 1) (SLC16A1), mRNA [NM_003051]	-0.500713	0.706758	10.0151	-23.6311	3.28e-08	7.53e-06	9.85957
202	55272	IMP3	IMP3, U3 small nucleolar ribonucleoprotein, homolog (yeast)	Hs.513043	ENSG00000177971	A_23_P33809	ref|Homo sapiens IMP3, U3 small nucleolar ribonucleoprotein, homolog (yeast) (IMP3), mRNA [NM_018285]	-0.496962	0.708597	8.67217	-23.7149	3.2e-08	7.39e-06	9.88513
20897	26160	IFT172	intraflagellar transport 172 homolog (Chlamydomonas)	Hs.127401	ENSG00000138002	A_23_P406135	ref|Homo sapiens intraflagellar transport 172 homolog (Chlamydomonas) (IFT172), mRNA [NM_015662]	-0.496854	0.708651	10.0319	-23.4365	3.49e-08	7.76e-06	9.7998
18673	9394	HS6ST1	heparan sulfate 6-O-sulfotransferase 1	Hs.512841	ENSG00000136720	A_23_P90587	ref|Homo sapiens heparan sulfate 6-O-sulfotransferase 1 (HS6ST1), mRNA [NM_004807]	-0.49544	0.709345	6.21876	-14.3731	1.19e-06	5.19e-05	6.13184
22195	114990	VASN	vasorin	Hs.372579	ENSG00000168140	A_23_P129695	ref|Homo sapiens vasorin (VASN), mRNA [NM_138440]	-0.494613	0.709752	6.58282	-17.4053	3.01e-07	2.39e-05	7.59098
14737	7597	ZBTB25	zinc finger and BTB domain containing 25	Hs.654571	ENSG00000089775	A_23_P48628	ref|Homo sapiens zinc finger and BTB domain containing 25 (ZBTB25), mRNA [NM_006977]	-0.494109	0.71	8.24983	-20.7425	8.47e-08	1.26e-05	8.9055
39457	7374	UNG	uracil-DNA glycosylase	Hs.191334	ENSG00000076248	A_24_P398585	ref|Homo sapiens uracil-DNA glycosylase (UNG), nuclear gene encoding mitochondrial protein, transcript variant 1, mRNA [NM_003362]	-0.493311	0.710393	6.61065	-12.4852	3.23e-06	9.53e-05	5.05208
4520	55248	TMEM206	transmembrane protein 206	Hs.445386	ENSG00000065600	A_23_P717	ref|Homo sapiens transmembrane protein 206 (TMEM206), mRNA [NM_018252]	-0.493206	0.710444	7.99725	-22.067	5.4e-08	9.37e-06	9.3614
40147	11331	PHB2	prohibitin 2	Hs.504620	ENSG00000215021	A_23_P151106	ref|Homo sapiens prohibitin 2 (PHB2), mRNA [NM_007273]	-0.492225	0.710928	13.1577	-19.323	1.41e-07	1.63e-05	8.37786
10582	25901	CCDC28A	coiled-coil domain containing 28A	Hs.412019	ENSG00000024862	A_23_P31085	ref|Homo sapiens coiled-coil domain containing 28A (CCDC28A), mRNA [NM_015439]	-0.491978	0.71105	10.2502	-21.5864	6.34e-08	1.05e-05	9.1998
2097	788	SLC25A20	solute carrier family 25 (carnitine/acylcarnitine translocase), member 20	Hs.13845	ENSG00000178537	A_23_P72025	ref|Homo sapiens solute carrier family 25 (carnitine/acylcarnitine translocase), member 20 (SLC25A20), nuclear gene encoding mitochondrial protein, mRNA [NM_000387]	-0.490811	0.711625	8.09351	-19.3793	1.39e-07	1.62e-05	8.39961
3227	200958	MUC20	mucin 20, cell surface associated	Hs.308992	ENSG00000176945	A_23_P92222	ref|Homo sapiens mucin 20, cell surface associated (MUC20), transcript variant L, mRNA [NM_152673]	-0.490307	0.711874	7.50785	-15.8063	6.01e-07	3.55e-05	6.8585
4963	2027	ENO3	enolase 3 (beta, muscle)	Hs.224171	ENSG00000108515	A_23_P130149	ref|Homo sapiens enolase 3 (beta, muscle) (ENO3), transcript variant 1, mRNA [NM_001976]	-0.489777	0.712135	7.99931	-17.5069	2.88e-07	2.33e-05	7.63502
42017	140680	C20orf96	chromosome 20 open reading frame 96	Hs.348112	ENSG00000196476	A_23_P328034	ref|Homo sapiens chromosome 20 open reading frame 96 (C20orf96), mRNA [NM_153269]	-0.489399	0.712322	8.08167	-17.718	2.65e-07	2.22e-05	7.72564
14531	57654	KIAA1530	KIAA1530	Hs.380475	ENSG00000163945	A_32_P319880	ref|Homo sapiens KIAA1530 (KIAA1530), mRNA [NM_020894]	-0.488449	0.712791	7.95003	-22.4935	4.7e-08	8.94e-06	9.50134
11695	101	ADAM8	ADAM metallopeptidase domain 8	Hs.501574	NA	A_24_P300777	ref|Homo sapiens ADAM metallopeptidase domain 8 (ADAM8), mRNA [NM_001109]	-0.488219	0.712904	10.6348	-17.1288	3.38e-07	2.57e-05	7.46963
20822	9610	RIN1	Ras and Rab interactor 1	Hs.1030	ENSG00000174791	A_23_P64102	ref|Homo sapiens Ras and Rab interactor 1 (RIN1), mRNA [NM_004292]	-0.488009	0.713008	8.29297	-7.53078	0.000103758	0.000911806	1.2444
15645	23145	SSPO	SCO-spondin homolog (Bos taurus)	Hs.632022	NA	A_23_P353048	ref|Homo sapiens SCO-spondin homolog (Bos taurus) (SSPO), mRNA [NM_198455]	-0.483034	0.715472	5.64064	-11.9246	4.46e-06	0.000115413	4.69995
42023	4345	CD200	CD200 molecule	Hs.79015	ENSG00000091972	A_23_P121480	ref|Homo sapiens CD200 molecule (CD200), transcript variant 2, mRNA [NM_001004196]	-0.480786	0.716587	7.20003	-16.7867	3.9e-07	2.78e-05	7.31655
43150	146456	TMED6	transmembrane emp24 protein transport domain containing 6	Hs.729118	ENSG00000157315	A_23_P26570	ref|Homo sapiens transmembrane emp24 protein transport domain containing 6 (TMED6), mRNA [NM_144676]	-0.478677	0.717635	6.88606	-17.3865	3.03e-07	2.4e-05	7.58278
31017	4499	MT1M	metallothionein 1M	Hs.647370, Hs.656629	ENSG00000205364	A_23_P66241	ref|Homo sapiens metallothionein 1M (MT1M), mRNA [NM_176870]	-0.478238	0.717854	8.72517	-21.883	5.74e-08	9.81e-06	9.30002
22078	124808	CCDC43	coiled-coil domain containing 43	Hs.579115	ENSG00000180329	A_24_P39724	ref|Homo sapiens coiled-coil domain containing 43 (CCDC43), transcript variant 1, mRNA [NM_144609]	-0.477938	0.718003	6.34338	-20.2443	1.01e-07	1.38e-05	8.72516
39865	65061	CDK15	cyclin-dependent kinase 15	Hs.348711	ENSG00000138395	A_23_P154050	ref|Homo sapiens PFTAIRE protein kinase 2 (PFTK2), mRNA [NM_139158]	-0.475261	0.719337	5.07449	-5.85959	0.000518415	0.00294406	-0.528238
10782	7349	UCN	urocortin	Hs.534363	ENSG00000163794	A_24_P62883	ref|Homo sapiens urocortin (UCN), mRNA [NM_003353]	-0.473468	0.720231	8.51423	-13.4602	1.89e-06	6.9e-05	5.62882
31324	2053	EPHX2	epoxide hydrolase 2, cytoplasmic	Hs.212088	ENSG00000120915	A_23_P8834	ref|Homo sapiens epoxide hydrolase 2, cytoplasmic (EPHX2), mRNA [NM_001979]	-0.47261	0.72066	8.49766	-22.6178	4.52e-08	8.75e-06	9.54154
36233	231	AKR1B1	aldo-keto reductase family 1, member B1 (aldose reductase)	Hs.521212	ENSG00000085662	A_23_P258190	ref|Homo sapiens aldo-keto reductase family 1, member B1 (aldose reductase) (AKR1B1), mRNA [NM_001628]	-0.472157	0.720886	8.77612	-22.0002	5.52e-08	9.55e-06	9.33918
26847	79661	NEIL1	nei endonuclease VIII-like 1 (E. coli)	Hs.512732	ENSG00000140398	A_23_P129157	ref|Homo sapiens nei endonuclease VIII-like 1 (E. coli) (NEIL1), mRNA [NM_024608]	-0.471864	0.721032	10.0579	-17.0376	3.51e-07	2.63e-05	7.42918
42236	284129	SLC26A11	solute carrier family 26, member 11	Hs.4866	ENSG00000181045	A_23_P125078	ref|Homo sapiens solute carrier family 26, member 11 (SLC26A11), mRNA [NM_173626]	-0.470227	0.721851	10.6954	-20.6523	8.74e-08	1.27e-05	8.87324
2200	285464	CRIPAK	cysteine-rich PAK1 inhibitor	Hs.26410	ENSG00000179979	A_23_P431330	ref|Homo sapiens cysteine-rich PAK1 inhibitor (CRIPAK), mRNA [NM_175918]	-0.468807	0.722562	8.32781	-20.3662	9.67e-08	1.35e-05	8.76975
8528	8190	MIA	melanoma inhibitory activity	Hs.646364	ENSG00000167578	A_23_P4714	ref|Homo sapiens melanoma inhibitory activity (MIA), mRNA [NM_006533]	-0.468112	0.72291	9.12209	-20.7007	8.59e-08	1.27e-05	8.8906
35117	2946	GSTM2	glutathione S-transferase mu 2 (muscle)	Hs.279837	ENSG00000213366	A_23_P397208	ref|Homo sapiens glutathione S-transferase mu 2 (muscle) (GSTM2), transcript variant 1, mRNA [NM_000848]	-0.468029	0.722952	5.99691	-15.0373	8.6e-07	4.31e-05	6.47761
24520	84448	ABLIM2	actin binding LIM protein family, member 2	Hs.233404	ENSG00000163995	A_23_P255672	ref|Homo sapiens actin binding LIM protein family, member 2 (ABLIM2), transcript variant 6, mRNA [NM_032432]	-0.467916	0.723008	6.17473	-22.1436	5.27e-08	9.33e-06	9.38679
40376	147968	CAPN12	calpain 12	Hs.712632	ENSG00000182472	A_24_P79040	ref|Homo sapiens calpain 12 (CAPN12), mRNA [NM_144691]	-0.467218	0.723358	7.46546	-16.8837	3.74e-07	2.71e-05	7.36029
38095	11077	HSF2BP	heat shock transcription factor 2 binding protein	Hs.406157	ENSG00000160207	A_23_P143512	ref|Homo sapiens heat shock transcription factor 2 binding protein (HSF2BP), mRNA [NM_007031]	-0.46549	0.724225	7.3786	-20.31	9.86e-08	1.36e-05	8.74924
17700	2026	ENO2	enolase 2 (gamma, neuronal)	Hs.511915	ENSG00000111674	A_24_P236091	ref|Homo sapiens enolase 2 (gamma, neuronal) (ENO2), mRNA [NM_001975]	-0.463876	0.725036	9.43724	-8.05625	6.63e-05	0.000670841	1.73876
14595	65012	SLC26A10	solute carrier family 26, member 10	Hs.727726	ENSG00000135502	A_23_P116642	ref|Homo sapiens solute carrier family 26, member 10 (SLC26A10), mRNA [NM_133489]	-0.463485	0.725232	8.24918	-22.301	5e-08	9.16e-06	9.43859
6726	23353	SUN1	Sad1 and UNC84 domain containing 1	Hs.438072	ENSG00000164828	A_23_P169838	ref|Homo sapiens unc-84 homolog A (C. elegans) (UNC84A), transcript variant 2, mRNA [NM_025154]	-0.46238	0.725788	10.9835	-19.9197	1.14e-07	1.47e-05	8.60488
40033	2134	EXTL1	exostoses (multiple)-like 1	Hs.150956	ENSG00000158008	A_23_P62999	ref|Homo sapiens exostoses (multiple)-like 1 (EXTL1), mRNA [NM_004455]	-0.460326	0.726822	5.70831	-8.29586	5.44e-05	0.000584265	1.95543
37141	2558	GABRA5	gamma-aminobutyric acid (GABA) A receptor, alpha 5	Hs.24969	ENSG00000186297	A_23_P436618	ref|Homo sapiens gamma-aminobutyric acid (GABA) A receptor, alpha 5 (GABRA5), mRNA [NM_000810]	-0.457557	0.728218	5.12393	-5.33598	0.000917732	0.00453389	-1.15547
38876	3000	GUCY2D	guanylate cyclase 2D, membrane (retina-specific)	Hs.592109	ENSG00000132518	A_23_P130259	ref|Homo sapiens guanylate cyclase 2D, membrane (retina-specific) (GUCY2D), mRNA [NM_000180]	-0.455617	0.729198	5.02166	-7.25395	0.000132741	0.00109131	0.972728
38708	100616668	LOC100616668	TPTE2 pseudogene	Hs.442781	NA	A_32_P101570	ref|Homo sapiens SGT1, suppressor of G2 allele of SKP1 like 1 (S. cerevisiae) (SUGT1L1), non-coding RNA [NR_003365]	-0.455567	0.729224	5.27955	-5.50918	0.000756753	0.0039213	-0.943857
35882	16	AARS	alanyl-tRNA synthetase	Hs.315137	ENSG00000090861	A_24_P172990	ref|Homo sapiens alanyl-tRNA synthetase (AARS), mRNA [NM_001605]	-0.4539	0.730066	10.2024	-15.5996	6.61e-07	3.71e-05	6.75808
22498	494513	DFNB59	deafness, autosomal recessive 59	Hs.87734	ENSG00000204311	A_24_P630490	ref|Homo sapiens deafness, autosomal recessive 59 (DFNB59), mRNA [NM_001042702]	-0.452726	0.730661	7.12975	-17.932	2.43e-07	2.14e-05	7.81634
28854	220001	VWCE	von Willebrand factor C and EGF domains	Hs.60640	ENSG00000167992	A_23_P52986	ref|Homo sapiens von Willebrand factor C and EGF domains (VWCE), mRNA [NM_152718]	-0.452206	0.730924	8.95274	-18.5697	1.89e-07	1.89e-05	8.07959
1158	10811	NOXA1	NADPH oxidase activator 1	Hs.495554	ENSG00000188747	A_23_P254353	ref|Homo sapiens NADPH oxidase activator 1 (NOXA1), mRNA [NM_006647]	-0.451764	0.731148	10.4139	-19.9327	1.13e-07	1.47e-05	8.60974
7457	64900	LPIN3	lipin 3	Hs.25897	ENSG00000132793	A_24_P100695	ref|Homo sapiens lipin 3 (LPIN3), mRNA [NM_022896]	-0.446676	0.733732	10.3776	-21.6557	6.19e-08	1.05e-05	9.22335
23712	64087	MCCC2	methylcrotonoyl-CoA carboxylase 2 (beta)	Hs.604789	ENSG00000131844	A_23_P18887	ref|Homo sapiens methylcrotonoyl-Coenzyme A carboxylase 2 (beta) (MCCC2), nuclear gene encoding mitochondrial protein, mRNA [NM_022132]	-0.44664	0.73375	10.424	-21.6137	6.28e-08	1.05e-05	9.20908
26298	80095	ZNF606	zinc finger protein 606	Hs.654967	ENSG00000166704	A_23_P4628	ref|Homo sapiens zinc finger protein 606 (ZNF606), mRNA [NM_025027]	-0.446388	0.733878	6.64359	-16.8983	3.72e-07	2.7e-05	7.36689
4997	51477	ISYNA1	inositol-3-phosphate synthase 1	Hs.405873	ENSG00000105655	A_23_P5131	ref|Homo sapiens inositol-3-phosphate synthase 1 (ISYNA1), mRNA [NM_016368]	-0.445309	0.734427	10.1128	-20.3301	9.79e-08	1.35e-05	8.75661
28337	30818	KCNIP3	Kv channel interacting protein 3, calsenilin	Hs.437376	ENSG00000115041	A_23_P356004	ref|Homo sapiens Kv channel interacting protein 3, calsenilin (KCNIP3), transcript variant 1, mRNA [NM_013434]	-0.444488	0.734845	7.62911	-15.6866	6.35e-07	3.62e-05	6.80051
32867	5613	PRKX	protein kinase, X-linked	Hs.390788	ENSG00000183943	A_23_P217339	ref|Homo sapiens protein kinase, X-linked (PRKX), mRNA [NM_005044]	-0.444136	0.735025	7.84102	-14.4184	1.16e-06	5.13e-05	6.15591
34662	51430	C1orf9	chromosome 1 open reading frame 9	Hs.626306	ENSG00000094975	A_23_P104054	ref|Homo sapiens chromosome 1 open reading frame 9 (C1orf9), transcript variant 2, mRNA [NM_016227]	-0.443627	0.735284	10.0225	-20.8737	8.09e-08	1.23e-05	8.95218
9353	7786	MAP3K12	mitogen-activated protein kinase kinase kinase 12	Hs.713539	ENSG00000139625	A_23_P105409	ref|Homo sapiens mitogen-activated protein kinase kinase kinase 12 (MAP3K12), mRNA [NM_006301]	-0.443403	0.735398	7.75581	-19.1916	1.49e-07	1.67e-05	8.32678
40479	85465	EPT1	ethanolaminephosphotransferase 1 (CDP-ethanolamine-specific)	Hs.189073	ENSG00000138018	A_23_P68300	ref|Homo sapiens selenoprotein I (SELI), mRNA [NM_033505]	-0.443206	0.735498	8.18117	-15.7773	6.09e-07	3.55e-05	6.84451
19050	9985	REC8	REC8 homolog (yeast)	Hs.419259	ENSG00000100918	A_24_P344087	ref|Homo sapiens REC8 homolog (yeast) (REC8), transcript variant 2, mRNA [NM_001048205]	-0.443183	0.73551	8.02118	-21.3647	6.83e-08	1.11e-05	9.12382
13791	5327	PLAT	plasminogen activator, tissue	Hs.491582	ENSG00000104368	A_23_P82868	ref|Homo sapiens plasminogen activator, tissue (PLAT), transcript variant 1, mRNA [NM_000930]	-0.443141	0.735532	6.99627	-15.2773	7.67e-07	4.05e-05	6.59863
3791	163183	C19orf46	chromosome 19 open reading frame 46	Hs.436743	ENSG00000181392	A_23_P350074	ref|Homo sapiens chromosome 19 open reading frame 46 (C19orf46), mRNA [NM_001039876]	-0.438418	0.737943	7.19267	-12.5266	3.15e-06	9.39e-05	5.07749
17270	6919	TCEA2	transcription elongation factor A (SII), 2	Hs.505004	ENSG00000171703	A_23_P147641	ref|Homo sapiens transcription elongation factor A (SII), 2 (TCEA2), transcript variant 1, mRNA [NM_003195]	-0.437549	0.738388	11.0038	-20.8487	8.16e-08	1.23e-05	8.94332
10190	161497	STRC	stereocilin	Hs.657395, Hs.679467	ENSG00000242866	A_23_P163238	ref|Homo sapiens stereocilin (STRC), mRNA [NM_153700]	-0.437434	0.738447	5.9277	-15.6973	6.32e-07	3.62e-05	6.80574
25120	393	ARHGAP4	Rho GTPase activating protein 4	Hs.701324	ENSG00000089820	A_23_P159927	ref|Homo sapiens Rho GTPase activating protein 4 (ARHGAP4), mRNA [NM_001666]	-0.435328	0.739525	8.07231	-18.6065	1.86e-07	1.88e-05	8.09448
25398	4521	NUDT1	nudix (nucleoside diphosphate linked moiety X)-type motif 1	Hs.534331	ENSG00000106268	A_23_P134295	ref|Homo sapiens nudix (nucleoside diphosphate linked moiety X)-type motif 1 (NUDT1), transcript variant 2B, mRNA [NM_198949]	-0.435173	0.739605	11.0754	-20.3921	9.58e-08	1.34e-05	8.77919
35419	1889	ECE1	endothelin converting enzyme 1	Hs.195080	ENSG00000117298	A_24_P396375	ref|Homo sapiens endothelin converting enzyme 1 (ECE1), transcript variant 3, mRNA [NM_001113347]	-0.435079	0.739653	7.9866	-7.17502	0.000142592	0.00115092	0.893778
36951	55620	STAP2	signal transducing adaptor family member 2	Hs.194385	ENSG00000178078	A_23_P382188	ref|Homo sapiens signal transducing adaptor family member 2 (STAP2), transcript variant 2, mRNA [NM_001013841]	-0.433948	0.740233	6.38754	-13.0653	2.34e-06	7.73e-05	5.4004
39786	8856	NR1I2	nuclear receptor subfamily 1, group I, member 2	Hs.7303	ENSG00000144852	A_23_P109785	ref|Homo sapiens nuclear receptor subfamily 1, group I, member 2 (NR1I2), transcript variant 1, mRNA [NM_003889]	-0.43394	0.740238	4.98791	-5.28456	0.000972564	0.00473148	-1.21909
29746	27345	KCNMB4	potassium large conductance calcium-activated channel, subfamily M, beta member 4	Hs.525529	ENSG00000135643	A_23_P64792	ref|Homo sapiens potassium large conductance calcium-activated channel, subfamily M, beta member 4 (KCNMB4), mRNA [NM_014505]	-0.43214	0.741161	9.17241	-18.1859	2.19e-07	2.04e-05	7.92235
28245	3299	HSF4	heat shock transcription factor 4	Hs.512156, Hs.710714	ENSG00000102878	A_23_P3592	ref|Homo sapiens heat shock transcription factor 4 (HSF4), transcript variant 2, mRNA [NM_001040667]	-0.432095	0.741185	8.73649	-11.4472	5.94e-06	0.000138485	4.38719
24479	5730	PTGDS	prostaglandin D2 synthase 21kDa (brain)	Hs.446429	ENSG00000107317	A_23_P146554	ref|Homo sapiens prostaglandin D2 synthase 21kDa (brain) (PTGDS), mRNA [NM_000954]	-0.431427	0.741528	8.85086	-19.3913	1.38e-07	1.61e-05	8.40425
39864	387775	SLC22A10	solute carrier family 22, member 10	Hs.188982	ENSG00000184999	A_23_P161968	ref|Homo sapiens solute carrier family 22, member 10 (SLC22A10), mRNA [NM_001039752]	-0.429484	0.742527	5.12662	-7.99343	6.98e-05	0.000695996	1.68107
30013	342908	ZNF404	zinc finger protein 404	Hs.76561	ENSG00000176222	A_23_P90333	ref|Homo sapiens zinc finger protein 404 (ZNF404), mRNA [NM_001033719]	-0.428971	0.742791	8.49382	-19.8024	1.18e-07	1.51e-05	8.56087
16716	79957	PAQR6	progestin and adipoQ receptor family member VI	Hs.235873	ENSG00000160781	A_23_P97283	ref|Homo sapiens progestin and adipoQ receptor family member VI (PAQR6), transcript variant 1, mRNA [NM_024897]	-0.428849	0.742854	11.1915	-18.6951	1.8e-07	1.85e-05	8.13018
34453	90990	KIFC2	kinesin family member C2	Hs.528713	ENSG00000167702	A_23_P358542	ref|Homo sapiens kinesin family member C2 (KIFC2), mRNA [NM_145754]	-0.427828	0.74338	8.33013	-19.9168	1.14e-07	1.47e-05	8.60383
6875	284339	TMEM145	transmembrane protein 145	Hs.382075	ENSG00000167619	A_23_P67127	ref|Homo sapiens transmembrane protein 145 (TMEM145), mRNA [NM_173633]	-0.426632	0.743997	8.11112	-12.6318	2.97e-06	9.06e-05	5.1416
34286	93953	ACRC	acidic repeat containing	Hs.135167	ENSG00000147174	A_23_P171237	ref|Homo sapiens acidic repeat containing (ACRC), mRNA [NM_052957]	-0.425675	0.74449	7.63499	-15.7458	6.18e-07	3.58e-05	6.82924
40283	6534	SLC6A7	solute carrier family 6 (neurotransmitter transporter, L-proline), member 7	Hs.241597	ENSG00000011083	A_23_P343766	ref|Homo sapiens solute carrier family 6 (neurotransmitter transporter, L-proline), member 7 (SLC6A7), mRNA [NM_014228]	-0.424546	0.745073	5.03093	-5.77975	0.000564302	0.00313528	-0.62149
17318	28973	MRPS18B	mitochondrial ribosomal protein S18B	Hs.655329	ENSG00000226111, ENSG00000203624, ENSG00000204568, ENSG00000223775, ENSG00000229861, ENSG00000227420, ENSG00000233813	A_23_P59107	ref|Homo sapiens mitochondrial ribosomal protein S18B (MRPS18B), nuclear gene encoding mitochondrial protein, mRNA [NM_014046]	-0.424086	0.745311	10.9359	-19.6346	1.26e-07	1.56e-05	8.49741
39371	4675	NAP1L3	nucleosome assembly protein 1-like 3	Hs.21365	ENSG00000186310	A_23_P125717	ref|Homo sapiens nucleosome assembly protein 1-like 3 (NAP1L3), mRNA [NM_004538]	-0.421815	0.746485	4.93935	-5.8793	0.000507739	0.0028972	-0.505355
23642	6319	SCD	stearoyl-CoA desaturase (delta-9-desaturase)	Hs.558396, Hs.597496	ENSG00000099194	A_24_P626920	ref|Homo sapiens stearoyl-CoA desaturase (delta-9-desaturase) (SCD), mRNA [NM_005063]	-0.42107	0.746871	13.9337	-19.1028	1.54e-07	1.69e-05	8.29203
30972	65998	C11orf95	chromosome 11 open reading frame 95	Hs.191073	NA	A_24_P876408	gb|Homo sapiens cDNA FLJ38987 fis, clone NT2RI2005818. [AK096306]	-0.420072	0.747387	7.9379	-17.0582	3.48e-07	2.61e-05	7.43834
41181	57465	TBC1D24	TBC1 domain family, member 24	Hs.353087	ENSG00000162065	A_23_P391637	ref|Homo sapiens TBC1 domain family, member 24 (TBC1D24), mRNA [NM_020705]	-0.419997	0.747426	5.10186	-6.36771	0.000307713	0.00201105	0.0458932
16455	51241	COX16	COX16 cytochrome c oxidase assembly homolog (S. cerevisiae)	Hs.709581	ENSG00000133983	A_23_P53957	ref|Homo sapiens COX16 cytochrome c oxidase assembly homolog (S. cerevisiae) (COX16), mRNA [NM_016468]	-0.419271	0.747802	10.2941	-10.8681	8.54e-06	0.000173859	3.99064
39976	147011	PROCA1	protein interacting with cyclin A1	Hs.207471	ENSG00000167525	A_23_P427148	ref|Homo sapiens proline-rich cyclin A1-interacting protein (PROCA1), mRNA [NM_152465]	-0.417891	0.748518	8.18713	-19.1789	1.49e-07	1.67e-05	8.3218
17943	4050	LTB	lymphotoxin beta (TNF superfamily, member 3)	Hs.376208	ENSG00000231314, ENSG00000227507, ENSG00000204487, ENSG00000223448, ENSG00000236925, ENSG00000238114, ENSG00000206437, ENSG00000236237	A_23_P93348	ref|Homo sapiens lymphotoxin beta (TNF superfamily, member 3) (LTB), transcript variant 1, mRNA [NM_002341]	-0.41683	0.749069	7.30717	-19.6586	1.25e-07	1.56e-05	8.50652
41501	8718	TNFRSF25	tumor necrosis factor receptor superfamily, member 25	Hs.462529	ENSG00000215788	A_23_P126844	ref|Homo sapiens tumor necrosis factor receptor superfamily, member 25 (TNFRSF25), transcript variant 1, mRNA [NM_148965]	-0.416168	0.749412	12.6995	-14.1122	1.35e-06	5.59e-05	5.99149
31201	80162	ATHL1	ATH1, acid trehalase-like 1 (yeast)	Hs.353181	ENSG00000142102	A_23_P98686	ref|Homo sapiens ATH1, acid trehalase-like 1 (yeast) (ATHL1), mRNA [NM_025092]	-0.415887	0.749559	9.76748	-7.78641	8.32e-05	0.000783933	1.48829
39932	338799	LOC338799	hypothetical LOC338799	Hs.524804	NA	A_23_P116743	ref|Homo sapiens hypothetical locus LOC338799 (LOC338799), non-coding RNA [NR_002809]	-0.414696	0.750177	9.07394	-19.1673	1.5e-07	1.67e-05	8.31729
34944	79571	GCC1	GRIP and coiled-coil domain containing 1	Hs.521168	ENSG00000179562	A_23_P71094	ref|Homo sapiens GRIP and coiled-coil domain containing 1 (GCC1), mRNA [NM_024523]	-0.414178	0.750447	7.48155	-11.2595	6.67e-06	0.000148596	4.26077
40767	92270	ATP6AP1L	ATPase, H+ transporting, lysosomal accessory protein 1-like	Hs.364045	ENSG00000205464	A_24_P807031	ref|Homo sapiens V-type proton ATPase subunit S1-like protein (LOC92270), mRNA [NM_001017971]	-0.413613	0.750741	7.1079	-14.4472	1.14e-06	5.07e-05	6.17124
5084	9388	LIPG	lipase, endothelial	Hs.465102	ENSG00000101670	A_23_P78405	ref|Homo sapiens lipase, endothelial (LIPG), mRNA [NM_006033]	-0.412288	0.751431	7.23402	-13.841	1.55e-06	6.15e-05	5.84275
4768	282991	BLOC1S2	biogenesis of lysosomal organelles complex-1, subunit 2	Hs.34906	ENSG00000196072	A_23_P23960	ref|Homo sapiens biogenesis of lysosomal organelles complex-1, subunit 2 (BLOC1S2), transcript variant 2, mRNA [NM_001001342]	-0.412287	0.751431	9.82232	-15.5434	6.78e-07	3.77e-05	6.73055
40821	2979	GUCA1B	guanylate cyclase activator 1B (retina)	Hs.446529	ENSG00000112599	A_32_P64200	ref|Homo sapiens guanylate cyclase activator 1B (retina) (GUCA1B), mRNA [NM_002098]	-0.410716	0.75225	6.43326	-11.5679	5.52e-06	0.000132228	4.46743
29176	10437	IFI30	interferon, gamma-inducible protein 30	Hs.14623	ENSG00000216490	A_23_P153745	ref|Homo sapiens interferon, gamma-inducible protein 30 (IFI30), mRNA [NM_006332]	-0.409694	0.752783	10.7776	-19.0972	1.54e-07	1.69e-05	8.28983
3194	64714	PDIA2	protein disulfide isomerase family A, member 2	Hs.66581	ENSG00000185615	A_23_P325642	ref|Homo sapiens protein disulfide isomerase family A, member 2 (PDIA2), mRNA [NM_006849]	-0.409486	0.752892	9.21421	-17.2252	3.24e-07	2.51e-05	7.51218
9709	122953	JDP2	Jun dimerization protein 2	Hs.196482	ENSG00000140044	A_23_P117582	ref|Homo sapiens Jun dimerization protein 2 (JDP2), transcript variant 1, mRNA [NM_130469]	-0.409311	0.752983	7.1467	-15.0637	8.49e-07	4.29e-05	6.49099
42840	8748	ADAM20	ADAM metallopeptidase domain 20	Hs.177984	ENSG00000134007	A_23_P48698	ref|Homo sapiens ADAM metallopeptidase domain 20 (ADAM20), mRNA [NM_003814]	-0.408818	0.75324	7.91476	-16.9401	3.66e-07	2.68e-05	7.3856
30247	116441	TM4SF18	transmembrane 4 L six family member 18	Hs.22026	ENSG00000163762	A_24_P120251	ref|Homo sapiens transmembrane 4 L six family member 18 (TM4SF18), mRNA [NM_138786]	-0.408566	0.753372	13.0152	-17.9487	2.41e-07	2.14e-05	7.82336
36196	22983	MAST1	microtubule associated serine/threonine kinase 1	Hs.227489	ENSG00000105613	A_23_P101480	ref|Homo sapiens microtubule associated serine/threonine kinase 1 (MAST1), mRNA [NM_014975]	-0.407256	0.754056	7.31247	-19.5614	1.29e-07	1.57e-05	8.46951
20127	56103	PCDHGB2	protocadherin gamma subfamily B, 2	Hs.368160	ENSG00000253910	A_23_P411772	ref|Homo sapiens protocadherin gamma subfamily B, 2 (PCDHGB2), transcript variant 2, mRNA [NM_032096]	-0.406626	0.754385	10.4194	-16.2048	5.03e-07	3.18e-05	7.04825
5517	55830	GLT8D1	glycosyltransferase 8 domain containing 1	Hs.297304	ENSG00000016864	A_23_P132669	ref|Homo sapiens glycosyltransferase 8 domain containing 1 (GLT8D1), transcript variant 3, mRNA [NM_001010983]	-0.406389	0.754509	10.5313	-16.2898	4.84e-07	3.11e-05	7.08812
22367	6596	HLTF	helicase-like transcription factor	Hs.3068	ENSG00000071794	A_32_P210798	gb|BF513730 UI-H-BW1-amy-e-05-0-UI.s1 NCI_CGAP_Sub7 Homo sapiens cDNA clone IMAGE:3071696 3', mRNA sequence [BF513730]	-0.406067	0.754678	8.8584	-17.7763	2.58e-07	2.18e-05	7.75046
31463	253769	WDR27	WD repeat domain 27	Hs.131903	ENSG00000184465	A_32_P415151	ref|Homo sapiens WD repeat domain 27 (WDR27), mRNA [NM_182552]	-0.406037	0.754693	8.83701	-18.7308	1.77e-07	1.83e-05	8.14448
10577	4868	NPHS1	nephrosis 1, congenital, Finnish type (nephrin)	Hs.122186	ENSG00000161270	A_23_P5200	ref|Homo sapiens nephrosis 1, congenital, Finnish type (nephrin) (NPHS1), mRNA [NM_004646]	-0.405872	0.75478	6.15843	-16.5326	4.36e-07	2.95e-05	7.20066
33282	22889	KIAA0907	KIAA0907	Hs.728984	ENSG00000132680	A_23_P74467	ref|Homo sapiens KIAA0907 (KIAA0907), mRNA [NM_014949]	-0.405734	0.754852	9.62059	-12.269	3.65e-06	0.000102841	4.91818
40768	4498	MT1JP	metallothionein 1J, pseudogene	Hs.513626	NA	A_24_P74828	gb|Homo sapiens MTB (MTB) mRNA, complete cds. [AF348994]	-0.405094	0.755187	8.62812	-18.4857	1.95e-07	1.91e-05	8.0455
39537	284353	NKPD1	NTPase, KAP family P-loop domain containing 1	Hs.299256	ENSG00000179846	A_32_P319858	ref|Homo sapiens NTPase, KAP family P-loop domain containing 1 (NKPD1), transcript variant 2, mRNA [NM_198478]	-0.404899	0.755289	6.33947	-7.82327	8.06e-05	0.000767203	1.52292
13500	6584	SLC22A5	solute carrier family 22 (organic cation/carnitine transporter), member 5	Hs.443572	ENSG00000197375	A_24_P174755	ref|Homo sapiens solute carrier family 22 (organic cation/carnitine transporter), member 5 (SLC22A5), mRNA [NM_003060]	-0.404387	0.755557	9.04017	-14.8762	9.28e-07	4.5e-05	6.39522
13994	80108	ZFP2	zinc finger protein 2 homolog (mouse)	Hs.654533	ENSG00000198939	A_23_P133359	ref|Homo sapiens zinc finger protein 2 homolog (mouse) (ZFP2), mRNA [NM_030613]	-0.404079	0.755718	7.73365	-19.5989	1.28e-07	1.56e-05	8.48381
19575	7730	ZNF177	zinc finger protein 177	Hs.172979, Hs.728944	ENSG00000188629	A_24_P168398	ref|Homo sapiens zinc finger protein 177 (ZNF177), mRNA [NM_003451]	-0.404047	0.755735	7.20625	-13.8567	1.54e-06	6.12e-05	5.85141
18574	2887	GRB10	growth factor receptor-bound protein 10	Hs.164060	ENSG00000106070	A_23_P122863	ref|Homo sapiens growth factor receptor-bound protein 10 (GRB10), transcript variant 4, mRNA [NM_001001555]	-0.404008	0.755756	7.94705	-14.6589	1.03e-06	4.82e-05	6.2826
8754	1181	CLCN2	chloride channel 2	Hs.436847	ENSG00000114859	A_23_P132845	ref|Homo sapiens chloride channel 2 (CLCN2), mRNA [NM_004366]	-0.403227	0.756165	7.90466	-15.1598	8.11e-07	4.16e-05	6.53962
1088	9891	NUAK1	NUAK family, SNF1-like kinase, 1	Hs.728863	ENSG00000074590	A_23_P348257	ref|Homo sapiens NUAK family, SNF1-like kinase, 1 (NUAK1), mRNA [NM_014840]	-0.401937	0.756841	6.83413	-18.0006	2.36e-07	2.11e-05	7.84515
2608	26471	NUPR1	nuclear protein, transcriptional regulator, 1	Hs.513463	ENSG00000176046	A_24_P270728	ref|Homo sapiens nuclear protein 1 (NUPR1), transcript variant 1, mRNA [NM_001042483]	-0.400888	0.757392	6.90114	-16.2173	5e-07	3.17e-05	7.05416
38298	92305	TMEM129	transmembrane protein 129	Hs.518562	ENSG00000168936	A_23_P354175	ref|Homo sapiens transmembrane protein 129 (TMEM129), transcript variant 2, mRNA [NM_138385]	-0.399977	0.75787	5.29949	-8.42954	4.89e-05	0.000541943	2.07404
37593	55660	PRPF40A	PRP40 pre-mRNA processing factor 40 homolog A (S. cerevisiae)	Hs.643580	ENSG00000196504	A_23_P16762	ref|Homo sapiens PRP40 pre-mRNA processing factor 40 homolog A (S. cerevisiae) (PRPF40A), mRNA [NM_017892]	-0.397785	0.759023	10.8726	-15.8069	6.01e-07	3.55e-05	6.85883
4228	7779	SLC30A1	solute carrier family 30 (zinc transporter), member 1	Hs.519469	ENSG00000170385	A_23_P23815	ref|Homo sapiens solute carrier family 30 (zinc transporter), member 1 (SLC30A1), mRNA [NM_021194]	-0.395223	0.760372	9.19427	-18.7611	1.75e-07	1.83e-05	8.15665
25024	126231	ZNF573	zinc finger protein 573	Hs.531262	ENSG00000189144	A_23_P339079	ref|Homo sapiens zinc finger protein 573 (ZNF573), mRNA [NM_152360]	-0.394927	0.760528	9.15825	-17.1589	3.33e-07	2.55e-05	7.48294
17799	3850	KRT3	keratin 3	Hs.680652	ENSG00000186442	A_23_P33573	ref|Homo sapiens keratin 3 (KRT3), mRNA [NM_057088]	-0.393809	0.761117	7.38456	-13.299	2.06e-06	7.2e-05	5.5364
797	6508	SLC4A3	solute carrier family 4, anion exchanger, member 3	Hs.1176	ENSG00000114923	A_23_P39647	ref|Homo sapiens solute carrier family 4, anion exchanger, member 3 (SLC4A3), transcript variant 1, mRNA [NM_005070]	-0.392801	0.76165	8.2827	-18.5404	1.91e-07	1.89e-05	8.0677
28464	100131564	LOC100131564	hypothetical LOC100131564	Hs.648647	NA	A_24_P481375	gb|Homo sapiens cDNA FLJ11606 fis, clone HEMBA1003942. [AK021668]	-0.392085	0.762027	9.09678	-18.7091	1.79e-07	1.84e-05	8.13579
15782	3913	LAMB2	laminin, beta 2 (laminin S)	Hs.439726	ENSG00000172037	A_23_P21382	ref|Homo sapiens laminin, beta 2 (laminin S) (LAMB2), mRNA [NM_002292]	-0.390685	0.762767	11.1244	-18.3323	2.07e-07	1.96e-05	7.98275
32252	22981	NINL	ninein-like	Hs.631508	ENSG00000101004	A_23_P143374	ref|Homo sapiens ninein-like (NLP), mRNA [NM_025176]	-0.389782	0.763245	8.21606	-14.4804	1.13e-06	5.02e-05	6.1888
13382	23113	CUL9	cullin 9	Hs.485434	ENSG00000112659	A_23_P311740	ref|Homo sapiens p53-associated parkin-like cytoplasmic protein (PARC), mRNA [NM_015089]	-0.388178	0.764094	11.2097	-16.3568	4.7e-07	3.07e-05	7.11934
40778	100192379	PP12613	hypothetical LOC100192379	Hs.607691	NA	A_24_P238118	ref|Homo sapiens hypothetical LOC100192379 (LOC100192379), non-coding RNA [NR_024365]	-0.387329	0.764544	5.08906	-5.06311	0.00125388	0.00573594	-1.49736
22091	51287	CHCHD8	coiled-coil-helix-coiled-coil-helix domain containing 8	Hs.475387	ENSG00000181924	A_23_P13502	ref|Homo sapiens coiled-coil-helix-coiled-coil-helix domain containing 8 (CHCHD8), mRNA [NM_016565]	-0.386653	0.764902	11.5404	-18.4369	1.99e-07	1.92e-05	8.0256
21141	51258	MRPL51	mitochondrial ribosomal protein L51	Hs.55847	ENSG00000111639	A_23_P99138	ref|Homo sapiens mitochondrial ribosomal protein L51 (MRPL51), nuclear gene encoding mitochondrial protein, mRNA [NM_016497]	-0.385508	0.765509	12.1526	-18.2342	2.15e-07	2.01e-05	7.94235
8440	8508	NIPSNAP1	nipsnap homolog 1 (C. elegans)	Hs.173878	ENSG00000184117	A_23_P120860	ref|Homo sapiens nipsnap homolog 1 (C. elegans) (NIPSNAP1), mRNA [NM_003634]	-0.384682	0.765948	8.33441	-9.31294	2.48e-05	0.000348892	2.81956
28913	12	SERPINA3	serpin peptidase inhibitor, clade A (alpha-1 antiproteinase, antitrypsin), member 3	Hs.534293, Hs.710488	ENSG00000196136	A_32_P124727	gb|H25835 yl53b04.s1 Soares breast 3NbHBst Homo sapiens cDNA clone IMAGE:161935 3' similar to gb:X68733_rna1 ALPHA-1-ANTICHYMOTRYPSIN PRECURSOR (HUMAN);, mRNA sequence [H25835]	-0.384252	0.766176	7.34766	-13.4237	1.93e-06	6.96e-05	5.60797
37116	405	ARNT	aryl hydrocarbon receptor nuclear translocator	Hs.632446	ENSG00000143437	A_24_P391568	ref|Homo sapiens aryl hydrocarbon receptor nuclear translocator (ARNT), transcript variant 1, mRNA [NM_001668]	-0.38393	0.766347	9.39736	-11.1545	7.12e-06	0.000154791	4.18919
31428	7137	TNNI3	troponin I type 3 (cardiac)	Hs.709179	ENSG00000129991	A_23_P67453	ref|Homo sapiens troponin I type 3 (cardiac) (TNNI3), mRNA [NM_000363]	-0.383239	0.766714	6.71241	-14.4965	1.12e-06	5.01e-05	6.19731
16163	28968	SLC6A16	solute carrier family 6, member 16	Hs.130949	ENSG00000063127	A_23_P130735	ref|Homo sapiens solute carrier family 6, member 16 (SLC6A16), mRNA [NM_014037]	-0.382954	0.766866	7.33085	-16.9434	3.65e-07	2.68e-05	7.3871
10409	54741	LEPROT	leptin receptor overlapping transcript	Hs.23581	ENSG00000213625	A_24_P148094	ref|Homo sapiens leptin receptor overlapping transcript (LEPROT), mRNA [NM_017526]	-0.382421	0.767149	8.69917	-15.3137	7.55e-07	4.04e-05	6.61682
40282	3225	HOXC9	homeobox C9	Hs.658823	ENSG00000180806	A_23_P25150	ref|Homo sapiens homeobox C9 (HOXC9), mRNA [NM_006897]	-0.381311	0.76774	5.07281	-4.07469	0.00424599	0.0146951	-2.82485
11692	148398	SAMD11	sterile alpha motif domain containing 11	Hs.335293	ENSG00000187634	A_24_P402510	ref|Homo sapiens sterile alpha motif domain containing 11 (SAMD11), mRNA [NM_152486]	-0.381094	0.767855	5.76582	-11.3406	6.34e-06	0.000144523	4.31569
7186	177	AGER	advanced glycosylation end product-specific receptor	Hs.534342	ENSG00000231268, ENSG00000204305, ENSG00000206320, ENSG00000230514, ENSG00000234729, ENSG00000237405, ENSG00000229058	A_23_P93360	ref|Homo sapiens advanced glycosylation end product-specific receptor (AGER), transcript variant 1, mRNA [NM_001136]	-0.380123	0.768372	8.87839	-14.6762	1.02e-06	4.79e-05	6.29162
35368	100137047	JMJD7	jumonji domain containing 7	Hs.198161	ENSG00000168970, ENSG00000243789	A_23_P218203	ref|Homo sapiens jumonji domain containing 7 (JMJD7), mRNA [NM_001114632]	-0.380036	0.768419	11.0092	-12.7569	2.77e-06	8.66e-05	5.21716
15560	1375	CPT1B	carnitine palmitoyltransferase 1B (muscle)	Hs.439777, Hs.609867	ENSG00000205560	A_23_P218817	ref|Homo sapiens carnitine palmitoyltransferase 1B (muscle) (CPT1B), nuclear gene encoding mitochondrial protein, transcript variant 3, mRNA [NM_152246]	-0.378581	0.769194	8.67887	-13.6353	1.73e-06	6.52e-05	5.72791
38070	157378	TMEM65	transmembrane protein 65	Hs.187646	ENSG00000164983	A_24_P256583	ref|Homo sapiens transmembrane protein 65 (TMEM65), mRNA [NM_194291]	-0.37828	0.769354	6.69683	-17.2314	3.23e-07	2.51e-05	7.51489
39581	64220	STRA6	stimulated by retinoic acid gene 6 homolog (mouse)	Hs.24553	ENSG00000137868	A_23_P65779	ref|Homo sapiens stimulated by retinoic acid gene 6 homolog (mouse) (STRA6), transcript variant 2, mRNA [NM_022369]	-0.378001	0.769503	6.98306	-9.58093	2.04e-05	0.000306143	3.03344
41674	54576	UGT1A8	UDP glucuronosyltransferase 1 family, polypeptide A8	Hs.554822	ENSG00000242366	A_23_P158330	ref|Homo sapiens UDP glucuronosyltransferase 1 family, polypeptide A8 (UGT1A8), mRNA [NM_019076]	-0.377606	0.769714	7.70092	-15.5856	6.65e-07	3.73e-05	6.75123
12862	375775	PNPLA7	patatin-like phospholipase domain containing 7	Hs.294147	ENSG00000130653	A_24_P453855	gb|Homo sapiens cDNA FLJ44279 fis, clone TRACH2001549, moderately similar to Homo sapiens mRNA for neuropathy target esterase. [AK126267]	-0.377077	0.769996	5.93666	-13.0116	2.41e-06	7.89e-05	5.36884
2051	23219	FBXO28	F-box protein 28	Hs.64691	ENSG00000143756	A_23_P137578	ref|Homo sapiens F-box protein 28 (FBXO28), transcript variant 1, mRNA [NM_015176]	-0.377046	0.770013	8.84454	-8.90353	3.38e-05	0.000424023	2.48203
28505	89849	ATG16L2	ATG16 autophagy related 16-like 2 (S. cerevisiae)	Hs.653186	ENSG00000168010	A_23_P36305	ref|Homo sapiens ATG16 autophagy related 16-like 2 (S. cerevisiae) (ATG16L2), mRNA [NM_033388]	-0.376401	0.770357	8.55804	-13.4183	1.94e-06	6.97e-05	5.60486
14798	9924	PAN2	PAN2 poly(A) specific ribonuclease subunit homolog (S. cerevisiae)	Hs.273397	ENSG00000135473	A_23_P64689	ref|Homo sapiens PAN2 polyA specific ribonuclease subunit homolog (S. cerevisiae) (PAN2), transcript variant 1, mRNA [NM_014871]	-0.376112	0.770511	7.63399	-11.2687	6.63e-06	0.000148148	4.26706
42046	9517	SPTLC2	serine palmitoyltransferase, long chain base subunit 2	Hs.435661	ENSG00000100596	A_24_P150486	ref|Homo sapiens serine palmitoyltransferase, long chain base subunit 2 (SPTLC2), mRNA [NM_004863]	-0.37587	0.770641	5.86041	-17.0058	3.56e-07	2.65e-05	7.41498
13200	51380	CSAD	cysteine sulfinic acid decarboxylase	Hs.279815	ENSG00000139631	A_24_P27229	ref|Homo sapiens cysteine sulfinic acid decarboxylase (CSAD), mRNA [NM_015989]	-0.375722	0.77072	7.58271	-11.4916	5.78e-06	0.000136241	4.41681
29947	1827	RCAN1	regulator of calcineurin 1	Hs.282326	ENSG00000159200	A_23_P166248	ref|Homo sapiens regulator of calcineurin 1 (RCAN1), transcript variant 1, mRNA [NM_004414]	-0.374916	0.77115	11.1512	-14.499	1.12e-06	5.01e-05	6.1986
715	7732	RNF112	ring finger protein 112	Hs.189482	NA	A_23_P107116	ref|Homo sapiens ring finger protein 112 (RNF112), mRNA [NM_007148]	-0.373918	0.771684	7.38368	-14.2421	1.27e-06	5.39e-05	6.0617
28356	7869	SEMA3B	sema domain, immunoglobulin domain (Ig), short basic domain, secreted, (semaphorin) 3B	Hs.82222	ENSG00000012171	A_24_P294419	ref|Homo sapiens sema domain, immunoglobulin domain (Ig), short basic domain, secreted, (semaphorin) 3B (SEMA3B), transcript variant 1, mRNA [NM_004636]	-0.373842	0.771724	6.93136	-15.056	8.52e-07	4.29e-05	6.48711
31235	284948	SH2D6	SH2 domain containing 6	Hs.209542	ENSG00000152292	A_24_P120147	gb|Homo sapiens SH2 domain containing 6, mRNA (cDNA clone IMAGE:40022935), complete cds. [BC110073]	-0.372627	0.772375	5.81204	-14.6813	1.02e-06	4.79e-05	6.29427
31195	84214	DKFZP434F142	hypothetical DKFZp434F142	Hs.588334	NA	A_24_P269327	gb|Homo sapiens mRNA; cDNA DKFZp434F142 (from clone DKFZp434F142). [AL136837]	-0.372563	0.772409	7.25672	-17.9204	2.44e-07	2.14e-05	7.81143
25409	55607	PPP1R9A	protein phosphatase 1, regulatory (inhibitor) subunit 9A	Hs.21816	ENSG00000158528	A_32_P38623	ref|Homo sapiens protein phosphatase 1, regulatory (inhibitor) subunit 9A (PPP1R9A), mRNA [NM_017650]	-0.37205	0.772684	7.26949	-11.2801	6.59e-06	0.00014738	4.27474
12855	11000	SLC27A3	solute carrier family 27 (fatty acid transporter), member 3	Hs.438723	ENSG00000228580, ENSG00000143554	A_24_P179816	ref|Homo sapiens solute carrier family 27 (fatty acid transporter), member 3 (SLC27A3), mRNA [NM_024330]	-0.371877	0.772777	8.67415	-13.0786	2.32e-06	7.7e-05	5.40821
2130	79412	KREMEN2	kringle containing transmembrane protein 2	Hs.661128	ENSG00000131650	A_23_P77612	ref|Homo sapiens kringle containing transmembrane protein 2 (KREMEN2), transcript variant 4, mRNA [NM_172229]	-0.370875	0.773313	10.4474	-13.3648	1.99e-06	7.07e-05	5.57422
39449	100133941	CD24	CD24 molecule	Hs.644105	NA	A_23_P85250	gb|Homo sapiens CD24 signal transducer mRNA, complete cds and 3' region. [L33930]	-0.369849	0.773863	5.23412	-4.87126	0.00157126	0.00680802	-1.74408
42564	481	ATP1B1	ATPase, Na+/K+ transporting, beta 1 polypeptide	Hs.291196, Hs.706952	ENSG00000143153	A_32_P4647	gb|BE703462 MR2-NN1111-080800-009-d10 NN1111 Homo sapiens cDNA, mRNA sequence [BE703462]	-0.369549	0.774024	6.20015	-15.5233	6.85e-07	3.79e-05	6.72067
32333	9682	KDM4A	lysine (K)-specific demethylase 4A	Hs.155983, Hs.655569	ENSG00000066135	A_23_P74446	ref|Homo sapiens jumonji domain containing 2A (JMJD2A), mRNA [NM_014663]	-0.368324	0.774682	8.63429	-15.0898	8.38e-07	4.25e-05	6.50424
15934	100130331	LOC100130331	actin, gamma-like	Hs.661736	NA	A_32_P146286	gb|Homo sapiens mRNA; cDNA DKFZp434B2115 (from clone DKFZp434B2115). [AL122093]	-0.368306	0.774692	12.5469	-16.7657	3.94e-07	2.79e-05	7.30704
5397	51303	FKBP11	FK506 binding protein 11, 19 kDa	Hs.655103	ENSG00000134285	A_23_P25121	ref|Homo sapiens FK506 binding protein 11, 19 kDa (FKBP11), transcript variant 1, mRNA [NM_016594]	-0.367445	0.775154	9.0047	-17.5308	2.86e-07	2.31e-05	7.64534
10494	284427	SLC25A41	solute carrier family 25, member 41	Hs.375135	ENSG00000181240	A_23_P313550	ref|Homo sapiens solute carrier family 25, member 41 (SLC25A41), mRNA [NM_173637]	-0.367434	0.77516	7.75935	-14.399	1.17e-06	5.16e-05	6.14562
32498	64398	MPP5	membrane protein, palmitoylated 5 (MAGUK p55 subfamily member 5)	Hs.652312	ENSG00000072415	A_24_P347458	ref|Homo sapiens membrane protein, palmitoylated 5 (MAGUK p55 subfamily member 5) (MPP5), mRNA [NM_022474]	-0.3666	0.775608	6.29898	-15.791	6.06e-07	3.55e-05	6.85114
10253	382	ARF6	ADP-ribosylation factor 6	Hs.525330, Hs.719973	ENSG00000165527	A_23_P48691	ref|Homo sapiens ADP-ribosylation factor 6 (ARF6), mRNA [NM_001663]	-0.366374	0.77573	9.54415	-15.7882	6.06e-07	3.55e-05	6.84978
4872	727701	LINC00165	long intergenic non-protein coding RNA 165	Hs.382029	NA	A_32_P60013	gb|Homo sapiens chromosome 21 open reading frame 135, mRNA (cDNA clone IMAGE:3891427), with apparent retained intron. [BC009635]	-0.365846	0.776014	9.81491	-15.2026	7.95e-07	4.12e-05	6.5612
33549	84073	MYCBPAP	MYCBP associated protein	Hs.398196	ENSG00000136449	A_23_P141415	ref|Homo sapiens MYCBP associated protein (MYCBPAP), mRNA [NM_032133]	-0.365296	0.776309	7.38659	-15.2757	7.68e-07	4.05e-05	6.59784
28844	6711	SPTBN1	spectrin, beta, non-erythrocytic 1	Hs.503178, Hs.705692	ENSG00000115306	A_23_P339095	ref|Homo sapiens spectrin, beta, non-erythrocytic 1 (SPTBN1), transcript variant 2, mRNA [NM_178313]	-0.364864	0.776542	7.70856	-16.9188	3.69e-07	2.7e-05	7.37606
12668	643669	LOC643669	hypothetical protein LOC643669	Hs.355357	NA	A_24_P822692	gb|PREDICTED: Homo sapiens similar to mCG2980, transcript variant 1 (LOC643669), mRNA [XM_933621]	-0.36386	0.777083	6.8995	-13.166	2.22e-06	7.53e-05	5.45928
28225	90246	LOC90246	hypothetical LOC90246	Hs.635164	NA	A_24_P532180	gb|Homo sapiens cDNA FLJ13573 fis, clone PLACE1008584. [AK023635]	-0.36347	0.777293	8.6214	-15.2406	7.81e-07	4.09e-05	6.58025
4905	2905	GRIN2C	glutamate receptor, ionotropic, N-methyl D-aspartate 2C	Hs.436980	ENSG00000161509	A_24_P25530	ref|Homo sapiens glutamate receptor, ionotropic, N-methyl D-aspartate 2C (GRIN2C), mRNA [NM_000835]	-0.363033	0.777528	6.64341	-10.7252	9.37e-06	0.000183927	3.88971
6860	57060	PCBP4	poly(rC) binding protein 4	Hs.20930	ENSG00000090097	A_23_P166807	ref|Homo sapiens poly(rC) binding protein 4 (PCBP4), transcript variant 4, mRNA [NM_033010]	-0.363016	0.777537	10.0052	-16.5109	4.4e-07	2.96e-05	7.19066
37527	9518	GDF15	growth differentiation factor 15	Hs.616962	ENSG00000130513	A_23_P16523	ref|Homo sapiens growth differentiation factor 15 (GDF15), mRNA [NM_004864]	-0.36206	0.778053	8.78519	-8.2911	5.47e-05	0.000585799	1.95118
17793	123904	NRN1L	neuritin 1-like	Hs.435464	ENSG00000188038	A_32_P8551	ref|Homo sapiens neuritin 1-like (NRN1L), mRNA [NM_198443]	-0.361826	0.778179	7.65593	-16.9517	3.64e-07	2.68e-05	7.39083
10107	79048	SECISBP2	SECIS binding protein 2	Hs.59804	ENSG00000187742	A_23_P84872	ref|Homo sapiens SECIS binding protein 2 (SECISBP2), mRNA [NM_024077]	-0.360619	0.77883	6.64845	-11.8825	4.57e-06	0.000117277	4.67288
19013	8831	SYNGAP1	synaptic Ras GTPase activating protein 1	Hs.586264	ENSG00000197283, ENSG00000227460	A_24_P9346	ref|Homo sapiens synaptic Ras GTPase activating protein 1 homolog (rat) (SYNGAP1), mRNA [NM_006772]	-0.36015	0.779084	7.17145	-14.9422	8.99e-07	4.44e-05	6.42906
40940	92285	ZNF585B	zinc finger protein 585B	Hs.390568	ENSG00000245680	A_23_P90223	ref|Homo sapiens zinc finger protein 585B (ZNF585B), mRNA [NM_152279]	-0.359657	0.77935	7.75635	-17.2159	3.25e-07	2.51e-05	7.50807
5101	1107	CHD3	chromodomain helicase DNA binding protein 3	Hs.25601	ENSG00000170004	A_23_P21640	ref|Homo sapiens chromodomain helicase DNA binding protein 3 (CHD3), transcript variant 1, mRNA [NM_001005273]	-0.359344	0.779519	7.72314	-14.7489	9.87e-07	4.69e-05	6.32945
22030	440362	HERC2P4	hect domain and RLD 2 pseudogene 4	Hs.531536	NA	A_32_P139738	ref|Homo sapiens hect domain and RLD 2 pseudogene 4 (HERC2P4), non-coding RNA [NR_002827]	-0.358357	0.780052	11.6964	-12.7411	2.79e-06	8.71e-05	5.20769
26048	5176	SERPINF1	serpin peptidase inhibitor, clade F (alpha-2 antiplasmin, pigment epithelium derived factor), member 1	Hs.532768, Hs.721120	ENSG00000132386	A_23_P100660	ref|Homo sapiens serpin peptidase inhibitor, clade F (alpha-2 antiplasmin, pigment epithelium derived factor), member 1 (SERPINF1), mRNA [NM_002615]	-0.35833	0.780067	12.2087	-11.2899	6.55e-06	0.000146866	4.28143
14000	10826	C5orf4	chromosome 5 open reading frame 4	Hs.519694, Hs.713175	ENSG00000170271	A_23_P501831	ref|Homo sapiens chromosome 5 open reading frame 4 (C5orf4), transcript variant 2, mRNA [NM_032385]	-0.357088	0.780739	8.63387	-15.4328	7.14e-07	3.88e-05	6.676
31004	152189	CMTM8	CKLF-like MARVEL transmembrane domain containing 8	Hs.154986	ENSG00000170293	A_23_P40880	ref|Homo sapiens CKLF-like MARVEL transmembrane domain containing 8 (CMTM8), mRNA [NM_178868]	-0.356578	0.781015	7.43016	-15.2743	7.69e-07	4.05e-05	6.59715
4040	6293	VPS52	vacuolar protein sorting 52 homolog (S. cerevisiae)	Hs.480356	ENSG00000225590, ENSG00000223501, ENSG00000228425, ENSG00000236014, ENSG00000206286, ENSG00000224455, ENSG00000223618	A_23_P70583	ref|Homo sapiens vacuolar protein sorting 52 homolog (S. cerevisiae) (VPS52), mRNA [NM_022553]	-0.356474	0.781071	8.10064	-12.2561	3.68e-06	0.000103071	4.91011
25501	283767	GOLGA6L1	golgin A6 family-like 1	Hs.531569	ENSG00000197414	A_24_P50972	ref|Homo sapiens FLJ40198 protein (LOC283767), mRNA [NM_001001413]	-0.35539	0.781658	6.04941	-13.1618	2.22e-06	7.54e-05	5.45682
28216	140462	ASB9	ankyrin repeat and SOCS box containing 9	Hs.19404	ENSG00000102048	A_23_P125643	ref|Homo sapiens ankyrin repeat and SOCS box-containing 9 (ASB9), transcript variant 1, mRNA [NM_001031739]	-0.355324	0.781694	8.5597	-15.7135	6.27e-07	3.61e-05	6.81358
42754	80329	ULBP1	UL16 binding protein 1	Hs.653255	ENSG00000111981	A_23_P156873	ref|Homo sapiens UL16 binding protein 1 (ULBP1), mRNA [NM_025218]	-0.35502	0.781859	6.86865	-14.5891	1.07e-06	4.9e-05	6.24606
39782	64756	ATPAF1	ATP synthase mitochondrial F1 complex assembly factor 1	Hs.100874	ENSG00000123472	A_24_P919899	ref|Homo sapiens ATP synthase mitochondrial F1 complex assembly factor 1 (ATPAF1), nuclear gene encoding mitochondrial protein, transcript variant 1, mRNA [NM_022745]	-0.354974	0.781884	5.82301	-5.72036	0.000601362	0.00328895	-0.691404
34918	10616	RBCK1	RanBP-type and C3HC4-type zinc finger containing 1	Hs.247280	ENSG00000125826	A_23_P166051	ref|Homo sapiens RanBP-type and C3HC4-type zinc finger containing 1 (RBCK1), transcript variant 2, mRNA [NM_031229]	-0.354581	0.782097	8.8432	-8.8157	3.61e-05	0.000443301	2.40787
13379	26548	ITGB1BP2	integrin beta 1 binding protein (melusin) 2	Hs.109999	ENSG00000147166	A_23_P45424	ref|Homo sapiens integrin beta 1 binding protein (melusin) 2 (ITGB1BP2), mRNA [NM_012278]	-0.354526	0.782127	7.4784	-12.9819	2.45e-06	7.98e-05	5.35126
42166	1294	COL7A1	collagen, type VII, alpha 1	Hs.476218	ENSG00000114270	A_23_P144071	ref|Homo sapiens collagen, type VII, alpha 1 (COL7A1), mRNA [NM_000094]	-0.353982	0.782422	6.24607	-7.01596	0.000165031	0.00128126	0.732614
37152	284371	ZNF841	zinc finger protein 841	Hs.665751	ENSG00000197608	A_23_P27404	ref|Homo sapiens zinc finger protein 841 (ZNF841), mRNA [NM_001136499]	-0.353538	0.782663	8.52274	-16.528	4.36e-07	2.95e-05	7.19856
40529	23037	PDZD2	PDZ domain containing 2	Hs.481819	ENSG00000133401	A_23_P7402	ref|Homo sapiens PDZ domain containing 2 (PDZD2), mRNA [NM_178140]	-0.353316	0.782783	5.34879	-4.65506	0.002039	0.008303	-2.02843
33419	1951	CELSR3	cadherin, EGF LAG seven-pass G-type receptor 3 (flamingo homolog, Drosophila)	Hs.631926	ENSG00000008300	A_23_P92093	ref|Homo sapiens cadherin, EGF LAG seven-pass G-type receptor 3 (flamingo homolog, Drosophila) (CELSR3), mRNA [NM_001407]	-0.352201	0.783388	7.71254	-10.4569	1.12e-05	0.00020621	3.69672
21134	5140	PDE3B	phosphodiesterase 3B, cGMP-inhibited	Hs.445711	ENSG00000152270	A_23_P116114	ref|Homo sapiens phosphodiesterase 3B, cGMP-inhibited (PDE3B), mRNA [NM_000922]	-0.352123	0.78343	8.09787	-13.3017	2.06e-06	7.2e-05	5.53794
38627	662	BNIP1	BCL2/adenovirus E1B 19kDa interacting protein 1	Hs.145726	ENSG00000113734	A_23_P7655	ref|Homo sapiens BCL2/adenovirus E1B 19kDa interacting protein 1 (BNIP1), transcript variant BNIP1-a, mRNA [NM_013978]	-0.350501	0.784312	7.81785	-5.93629	0.000478213	0.00277761	-0.439457
327	349114	LINC00265	long intergenic non-protein coding RNA 265	Hs.414183	NA	A_24_P583225	ref|Homo sapiens hypothetical LOC402483 (FLJ45340), non-coding RNA [NR_024368]	-0.34849	0.785406	8.72816	-15.7499	6.17e-07	3.58e-05	6.83123
36766	100506451	LOC100506451	hypothetical LOC100506451	Hs.560092	NA	A_32_P144018	gb|Homo sapiens, clone IMAGE:3632683, mRNA. [BC004962]	-0.347899	0.785727	8.0623	-14.7656	9.79e-07	4.66e-05	6.33809
34300	9727	RAB11FIP3	RAB11 family interacting protein 3 (class II)	Hs.531642	ENSG00000090565	A_23_P106727	ref|Homo sapiens RAB11 family interacting protein 3 (class II) (RAB11FIP3), transcript variant 1, mRNA [NM_014700]	-0.347073	0.786177	10.2394	-16.8042	3.87e-07	2.77e-05	7.3245
36830	9668	ZNF432	zinc finger protein 432	Hs.655934	ENSG00000256087	A_23_P208210	ref|Homo sapiens zinc finger protein 432 (ZNF432), mRNA [NM_014650]	-0.346481	0.7865	8.60284	-13.9857	1.44e-06	5.86e-05	5.92245
18524	55556	ENOSF1	enolase superfamily member 1	Hs.369762, Hs.658550	ENSG00000132199	A_23_P4503	ref|Homo sapiens enolase superfamily member 1 (ENOSF1), transcript variant 1, mRNA [NM_017512]	-0.346227	0.786639	10.3227	-16.0899	5.29e-07	3.31e-05	6.99407
16892	55321	C20orf46	chromosome 20 open reading frame 46	Hs.516834	ENSG00000125895	A_23_P120504	ref|Homo sapiens chromosome 20 open reading frame 46 (C20orf46), mRNA [NM_018354]	-0.344852	0.787389	7.87391	-11.8135	4.76e-06	0.000120489	4.62828
37967	283551	C14orf182	chromosome 14 open reading frame 182	Hs.660867	ENSG00000214900	A_24_P263910	ens|Uncharacterized protein ENSP00000313396 Fragment [Source:UniProtKB/TrEMBL;Acc:A6NHK8] [ENST00000313688]	-0.3447	0.787472	8.74441	-10.1418	1.38e-05	0.000236045	3.46423
20951	8497	PPFIA4	protein tyrosine phosphatase, receptor type, f polypeptide (PTPRF), interacting protein (liprin), alpha 4	Hs.153648	ENSG00000143847	A_23_P420692	ref|Homo sapiens protein tyrosine phosphatase, receptor type, f polypeptide (PTPRF), interacting protein (liprin), alpha 4 (PPFIA4), mRNA [NM_015053]	-0.343983	0.787863	7.50208	-16.1249	5.21e-07	3.26e-05	7.0106
42796	116841	SNAP47	synaptosomal-associated protein, 47kDa	Hs.325081	ENSG00000143740	A_23_P393607	ref|Homo sapiens synaptosomal-associated protein, 47kDa (SNAP47), mRNA [NM_053052]	-0.343668	0.788035	9.5035	-9.59537	2.02e-05	0.000304185	3.04482
29028	10307	APBB3	amyloid beta (A4) precursor protein-binding, family B, member 3	Hs.529449	ENSG00000113108	A_23_P110445	ref|Homo sapiens amyloid beta (A4) precursor protein-binding, family B, member 3 (APBB3), transcript variant 4, mRNA [NM_006051]	-0.343372	0.788197	9.32028	-12.4909	3.22e-06	9.52e-05	5.05561
33201	54103	PION	pigeon homolog (Drosophila)	Hs.186649	ENSG00000186088	A_23_P416894	ref|Homo sapiens pigeon homolog (Drosophila) (PION), mRNA [NM_017439]	-0.343234	0.788272	7.99407	-14.98	8.83e-07	4.38e-05	6.44842
16766	3700	ITIH4	inter-alpha (globulin) inhibitor H4 (plasma Kallikrein-sensitive glycoprotein)	Hs.709406	ENSG00000055955	A_23_P109881	ref|Homo sapiens inter-alpha (globulin) inhibitor H4 (plasma Kallikrein-sensitive glycoprotein) (ITIH4), mRNA [NM_002218]	-0.343115	0.788337	7.58613	-9.44127	2.26e-05	0.000328079	2.92265
32947	9126	SMC3	structural maintenance of chromosomes 3	Hs.24485	ENSG00000108055	A_23_P138631	ref|Homo sapiens structural maintenance of chromosomes 3 (SMC3), mRNA [NM_005445]	-0.341925	0.788988	10.0545	-12.8987	2.56e-06	8.19e-05	5.30196
32665	80022	MYO15B	myosin XVB pseudogene	Hs.390817	NA	A_32_P475513	ref|Homo sapiens myosin XVB pseudogene (MYO15B) on chromosome 17 [NR_003587]	-0.341566	0.789184	6.11017	-9.33872	2.44e-05	0.000344134	2.84037
31925	5364	PLXNB1	plexin B1	Hs.476209	ENSG00000164050	A_23_P57961	ref|Homo sapiens plexin B1 (PLXNB1), transcript variant 1, mRNA [NM_002673]	-0.341318	0.78932	7.01948	-12.6145	3e-06	9.12e-05	5.13107
15041	51451	LCMT1	leucine carboxyl methyltransferase 1	Hs.337730	ENSG00000205629	A_23_P112825	ref|Homo sapiens leucine carboxyl methyltransferase 1 (LCMT1), transcript variant 1, mRNA [NM_016309]	-0.340942	0.789526	9.29832	-15.866	5.85e-07	3.5e-05	6.88727
16373	8641	PCDHGB4	protocadherin gamma subfamily B, 4	Hs.368160	ENSG00000253953	A_23_P359588	ref|Homo sapiens protocadherin gamma subfamily B, 4 (PCDHGB4), transcript variant 2, mRNA [NM_032098]	-0.340823	0.789591	6.22179	-10.4543	1.12e-05	0.000206385	3.69486
25109	55876	GSDMB	gasdermin B	Hs.306777	ENSG00000073605	A_23_P66454	ref|Homo sapiens gasdermin B (GSDMB), transcript variant 1, mRNA [NM_001042471]	-0.340782	0.789613	10.1581	-11.5076	5.73e-06	0.000135063	4.42746
23825	55157	DARS2	aspartyl-tRNA synthetase 2, mitochondrial	Hs.647707	ENSG00000117593	A_23_P148984	ref|Homo sapiens aspartyl-tRNA synthetase 2, mitochondrial (DARS2), nuclear gene encoding mitochondrial protein, mRNA [NM_018122]	-0.340548	0.789741	7.71948	-10.3573	1.19e-05	0.000215328	3.62395
11735	148327	CREB3L4	cAMP responsive element binding protein 3-like 4	Hs.372924	ENSG00000143578	A_23_P63232	ref|Homo sapiens cAMP responsive element binding protein 3-like 4 (CREB3L4), mRNA [NM_130898]	-0.33788	0.791203	8.85819	-16.1629	5.12e-07	3.21e-05	7.02855
10309	11273	ATXN2L	ataxin 2-like	Hs.460499	ENSG00000168488	A_23_P124661	ref|Homo sapiens ataxin 2-like (ATXN2L), transcript variant B, mRNA [NM_145714]	-0.33699	0.791691	10.5037	-11.8302	4.72e-06	0.000119618	4.63912
41423	100127951	LOC100127951	ISPF6484	Hs.555530	NA	A_24_P935575	gb|Homo sapiens clone DNA142958 ISPF6484 (UNQ6484) mRNA, complete cds. [AY358233]	-0.33601	0.792229	5.06073	-6.67135	0.000228535	0.00161923	0.373687
7400	8938	BAIAP3	BAI1-associated protein 3	Hs.458427	ENSG00000007516	A_23_P163492	ref|Homo sapiens BAI1-associated protein 3 (BAIAP3), mRNA [NM_003933]	-0.335711	0.792393	7.0903	-10.596	1.02e-05	0.000194821	3.79737
7785	5328	PLAU	plasminogen activator, urokinase	Hs.77274	ENSG00000122861	A_23_P24104	ref|Homo sapiens plasminogen activator, urokinase (PLAU), mRNA [NM_002658]	-0.33465	0.792976	12.5998	-13.7214	1.65e-06	6.36e-05	5.77618
21162	56113	PCDHGA2	protocadherin gamma subfamily A, 2	Hs.368160	ENSG00000081853	A_23_P422044	ref|Homo sapiens protocadherin gamma subfamily A, 2 (PCDHGA2), transcript variant 2, mRNA [NM_032009]	-0.334245	0.793199	7.45479	-11.5874	5.46e-06	0.00013139	4.48031
26535	130872	AHSA2	AHA1, activator of heat shock 90kDa protein ATPase homolog 2 (yeast)	Hs.644708, Hs.655602	ENSG00000173209	A_23_P372467	ref|Homo sapiens AHA1, activator of heat shock 90kDa protein ATPase homolog 2 (yeast) (AHSA2), mRNA [NM_152392]	-0.334041	0.793312	11.7631	-15.5472	6.77e-07	3.77e-05	6.7324
7914	6645	SNTB2	syntrophin, beta 2 (dystrophin-associated protein A1, 59kDa, basic component 2)	Hs.461117	ENSG00000168807	A_23_P33444	ref|Homo sapiens syntrophin, beta 2 (dystrophin-associated protein A1, 59kDa, basic component 2) (SNTB2), mRNA [NM_006750]	-0.333827	0.793429	9.38874	-15.7047	6.3e-07	3.62e-05	6.80931
15677	4778	NFE2	nuclear factor (erythroid-derived 2), 45kDa	Hs.75643	ENSG00000123405	A_23_P13753	ref|Homo sapiens nuclear factor (erythroid-derived 2), 45kDa (NFE2), mRNA [NM_006163]	-0.333295	0.793722	6.45243	-14.9894	8.79e-07	4.37e-05	6.45319
35654	198437	C20orf201	chromosome 20 open reading frame 201	Hs.570316	ENSG00000171695	A_23_P348524	ref|Homo sapiens chromosome 20 open reading frame 201 (C20orf201), mRNA [NM_001007125]	-0.332704	0.794047	6.05494	-6.27418	0.000337949	0.00215385	-0.05734
8102	5104	SERPINA5	serpin peptidase inhibitor, clade A (alpha-1 antiproteinase, antitrypsin), member 5	Hs.159628	ENSG00000188488	A_24_P321766	ref|Homo sapiens serpin peptidase inhibitor, clade A (alpha-1 antiproteinase, antitrypsin), member 5 (SERPINA5), mRNA [NM_000624]	-0.332682	0.794059	5.65828	-11.0475	7.62e-06	0.000162009	4.11555
24921	55073	LRRC37A4	leucine rich repeat containing 37, member A4 (pseudogene)	Hs.675446	NA	A_23_P4101	gb|Homo sapiens cDNA clone IMAGE:6171379, containing frame-shift errors. [BC088374]	-0.330997	0.794987	9.23806	-7.83682	7.97e-05	0.000760754	1.53562
41894	79676	OGFOD2	2-oxoglutarate and iron-dependent oxygenase domain containing 2	Hs.524817	ENSG00000111325	A_23_P53324	ref|Homo sapiens 2-oxoglutarate and iron-dependent oxygenase domain containing 2 (OGFOD2), mRNA [NM_024623]	-0.330633	0.795188	9.09549	-8.6617	4.07e-05	0.000480707	2.27627
11756	92822	ZNF276	zinc finger protein 276	Hs.729033	ENSG00000158805	A_24_P133671	ref|Homo sapiens zinc finger protein 276 (ZNF276), transcript variant b, mRNA [NM_152287]	-0.33013	0.795465	7.96176	-12.8118	2.69e-06	8.43e-05	5.2501
32065	3636	INPPL1	inositol polyphosphate phosphatase-like 1	Hs.523875	ENSG00000165458	A_23_P36322	ref|Homo sapiens inositol polyphosphate phosphatase-like 1 (INPPL1), mRNA [NM_001567]	-0.329759	0.79567	9.90295	-5.67664	0.000630369	0.00341957	-0.74317
12317	84218	TBC1D3F	TBC1 domain family, member 3F	Hs.454716	ENSG00000185128	A_23_P164210	ref|Homo sapiens TBC1 domain family, member 3 (TBC1D3), mRNA [NM_032258]	-0.329177	0.79599	10.2166	-15.7997	6.03e-07	3.55e-05	6.85535
15524	84706	GPT2	glutamic pyruvate transaminase (alanine aminotransferase) 2	Hs.460693	ENSG00000166123	A_24_P193648	ref|Homo sapiens glutamic pyruvate transaminase (alanine aminotransferase) 2 (GPT2), transcript variant 1, mRNA [NM_133443]	-0.328551	0.796336	9.25348	-15.1921	7.99e-07	4.13e-05	6.55592
11794	1427	CRYGS	crystallin, gamma S	Hs.376209	ENSG00000213139	A_23_P132738	ref|Homo sapiens crystallin, gamma S (CRYGS), mRNA [NM_017541]	-0.328004	0.796638	7.44733	-11.4162	6.06e-06	0.000140385	4.36648
355	84527	ZNF559	zinc finger protein 559	Hs.172979, Hs.730214	ENSG00000188321	A_24_P284584	ref|Homo sapiens zinc finger protein 559 (ZNF559), mRNA [NM_032497]	-0.32764	0.796839	6.63746	-9.62625	1.98e-05	0.000299999	3.06909
37755	56112	PCDHGA3	protocadherin gamma subfamily A, 3	Hs.368160	ENSG00000254245	A_24_P334529	ref|Homo sapiens protocadherin gamma subfamily A, 3 (PCDHGA3), transcript variant 2, mRNA [NM_032011]	-0.327354	0.796997	7.29282	-11.6403	5.28e-06	0.000128969	4.51522
33512	7857	SCG2	secretogranin II	Hs.516726	ENSG00000171951	A_24_P88696	ref|Homo sapiens secretogranin II (chromogranin C) (SCG2), mRNA [NM_003469]	-0.326833	0.797285	11.9435	-13.9052	1.5e-06	6.02e-05	5.8782
2537	9587	MAD2L1BP	MAD2L1 binding protein	Hs.122346, Hs.715485	ENSG00000124688	A_24_P43588	ref|Homo sapiens MAD2L1 binding protein (MAD2L1BP), transcript variant 1, mRNA [NM_001003690]	-0.326566	0.797433	9.70571	-13.5968	1.76e-06	6.6e-05	5.70625
27556	197258	FUK	fucokinase	Hs.7907	ENSG00000157353	A_23_P429461	ref|Homo sapiens fucokinase (FUK), mRNA [NM_145059]	-0.325657	0.797935	9.30171	-13.7684	1.61e-06	6.26e-05	5.8024
20171	8728	ADAM19	ADAM metallopeptidase domain 19	Hs.483944	ENSG00000135074	A_23_P374082	ref|Homo sapiens ADAM metallopeptidase domain 19 (meltrin beta) (ADAM19), transcript variant 2, mRNA [NM_033274]	-0.325454	0.798047	5.63759	-9.49118	2.18e-05	0.000320714	2.96242
352	3911	LAMA5	laminin, alpha 5	Hs.473256	ENSG00000130702	A_23_P109269	ref|Homo sapiens laminin, alpha 5 (LAMA5), mRNA [NM_005560]	-0.32432	0.798675	8.34521	-8.81401	3.62e-05	0.000443586	2.40643
9028	4007	PRICKLE3	prickle homolog 3 (Drosophila)	Hs.632802	ENSG00000012211	A_23_P348684	ref|Homo sapiens prickle homolog 3 (Drosophila) (PRICKLE3), mRNA [NM_006150]	-0.324006	0.798849	8.73691	-8.95447	3.25e-05	0.00041278	2.52477
28778	55701	ARHGEF40	Rho guanine nucleotide exchange factor (GEF) 40	Hs.35125	ENSG00000165801	A_23_P99661	ref|Homo sapiens hypothetical protein FLJ10357 (FLJ10357), mRNA [NM_018071]	-0.323351	0.799211	8.58605	-14.6612	1.03e-06	4.81e-05	6.28382
4181	2176	FANCC	Fanconi anemia, complementation group C	Hs.494529	ENSG00000158169	A_23_P32021	ref|Homo sapiens Fanconi anemia, complementation group C (FANCC), mRNA [NM_000136]	-0.323047	0.79938	8.11262	-13.5407	1.82e-06	6.73e-05	5.67455
17431	822	CAPG	capping protein (actin filament), gelsolin-like	Hs.516155	ENSG00000042493	A_23_P165636	ref|Homo sapiens capping protein (actin filament), gelsolin-like (CAPG), mRNA [NM_001747]	-0.321628	0.800167	12.0059	-15.4506	7.08e-07	3.87e-05	6.68479
24743	3087	HHEX	hematopoietically expressed homeobox	Hs.118651	ENSG00000152804	A_23_P47034	ref|Homo sapiens hematopoietically expressed homeobox (HHEX), mRNA [NM_002729]	-0.321604	0.80018	6.87773	-13.5893	1.77e-06	6.62e-05	5.702
108	8565	YARS	tyrosyl-tRNA synthetase	Hs.213264	ENSG00000134684	A_23_P379550	ref|Homo sapiens tyrosyl-tRNA synthetase (YARS), mRNA [NM_003680]	-0.321001	0.800514	8.87444	-14.8193	9.54e-07	4.58e-05	6.36589
32744	3295	HSD17B4	hydroxysteroid (17-beta) dehydrogenase 4	Hs.406861	ENSG00000133835	A_23_P92954	ref|Homo sapiens hydroxysteroid (17-beta) dehydrogenase 4 (HSD17B4), mRNA [NM_000414]	-0.320814	0.800618	9.231	-13.4783	1.88e-06	6.87e-05	5.63909
20321	79923	NANOG	Nanog homeobox	Hs.635882	ENSG00000111704	A_23_P204640	ref|Homo sapiens Nanog homeobox (NANOG), mRNA [NM_024865]	-0.320601	0.800736	6.68214	-10.426	1.14e-05	0.000209292	3.67427
26567	55230	USP40	ubiquitin specific peptidase 40	Hs.96513	ENSG00000085982	A_24_P314688	ref|Homo sapiens ubiquitin specific peptidase 40 (USP40), mRNA [NM_018218]	-0.319773	0.801196	7.83691	-5.40212	0.000852168	0.00428763	-1.07417
11809	25987	TSKU	tsukushi small leucine rich proteoglycan homolog (Xenopus laevis)	Hs.8361	ENSG00000182704	A_23_P162142	ref|Homo sapiens tsukushin (TSKU), mRNA [NM_015516]	-0.319583	0.801301	6.96093	-11.6092	5.38e-06	0.000130345	4.49471
41101	8999	CDKL2	cyclin-dependent kinase-like 2 (CDC2-related kinase)	Hs.591698	ENSG00000138769	A_23_P259270	ref|Homo sapiens cyclin-dependent kinase-like 2 (CDC2-related kinase) (CDKL2), mRNA [NM_003948]	-0.319515	0.801339	5.00907	-4.95698	0.00141966	0.0062989	-1.63319
30290	474170	LRRC37A2	leucine rich repeat containing 37, member A2	NA	ENSG00000238083	A_24_P666482	ref|Homo sapiens leucine rich repeat containing 37, member A2 (LRRC37A2), mRNA [NM_001006607]	-0.31914	0.801548	9.12552	-12.1513	3.91e-06	0.000106741	4.84429
40190	2934	GSN	gelsolin	Hs.522373	ENSG00000148180	A_23_P255884	ref|Homo sapiens gelsolin (amyloidosis, Finnish type) (GSN), transcript variant 2, mRNA [NM_198252]	-0.318796	0.801739	12.8389	-12.2593	3.67e-06	0.000103017	4.91209
22484	55780	C6orf70	chromosome 6 open reading frame 70	Hs.47546	ENSG00000130023	A_32_P129530	ref|Homo sapiens chromosome 6 open reading frame 70 (C6orf70), mRNA [NM_018341]	-0.318726	0.801778	9.01868	-14.485	1.12e-06	5.02e-05	6.19122
14429	200539	ANKRD23	ankyrin repeat domain 23	Hs.643430	ENSG00000163126	A_23_P305120	ref|Homo sapiens ankyrin repeat domain 23 (ANKRD23), mRNA [NM_144994]	-0.31871	0.801786	8.30904	-13.3244	2.04e-06	7.17e-05	5.55102
36224	3425	IDUA	iduronidase, alpha-L-	Hs.89560	ENSG00000127415	A_23_P167093	ref|Homo sapiens iduronidase, alpha-L- (IDUA), mRNA [NM_000203]	-0.318466	0.801922	7.91006	-12.6928	2.87e-06	8.86e-05	5.17852
17879	27132	CPNE7	copine VII	Hs.461775	ENSG00000178773	A_23_P26426	ref|Homo sapiens copine VII (CPNE7), transcript variant 2, mRNA [NM_014427]	-0.317831	0.802275	10.0034	-11.2375	6.76e-06	0.000149972	4.24585
21497	8408	ULK1	unc-51-like kinase 1 (C. elegans)	Hs.47061	ENSG00000177169	A_23_P72550	ref|Homo sapiens unc-51-like kinase 1 (C. elegans) (ULK1), mRNA [NM_003565]	-0.317372	0.80253	10.8945	-10.632	9.95e-06	0.000192012	3.82322
37968	167359	NIM1	serine/threonine-protein kinase NIM1	Hs.25845	ENSG00000177453	A_23_P254863	ref|Homo sapiens serine/threonine-protein kinase NIM1 (MGC42105), mRNA [NM_153361]	-0.317234	0.802607	5.01038	-12.2401	3.71e-06	0.00010357	4.90006
18757	55191	NADSYN1	NAD synthetase 1	Hs.556986	ENSG00000172890	A_23_P319153	gb|Homo sapiens mRNA; cDNA DKFZp761J2423 (from clone DKFZp761J2423). [AL512694]	-0.31679	0.802854	8.27638	-10.9023	8.36e-06	0.00017173	4.01462
39994	54602	NDFIP2	Nedd4 family interacting protein 2	Hs.525093	ENSG00000102471	A_32_P196072	ref|Homo sapiens Nedd4 family interacting protein 2 (NDFIP2), mRNA [NM_019080]	-0.316729	0.802888	8.37559	-13.9335	1.48e-06	5.95e-05	5.89378
8934	7084	TK2	thymidine kinase 2, mitochondrial	Hs.512619	ENSG00000166548	A_23_P351679	ref|Homo sapiens thymidine kinase 2, mitochondrial (TK2), nuclear gene encoding mitochondrial protein, mRNA [NM_004614]	-0.316461	0.803037	8.14794	-11.5337	5.64e-06	0.000133222	4.44482
14568	256329	C11orf35	chromosome 11 open reading frame 35	Hs.669395	ENSG00000185522	A_32_P336712	ref|Homo sapiens chromosome 11 open reading frame 35 (C11orf35), mRNA [NM_173573]	-0.316358	0.803094	6.08497	-15.1212	8.26e-07	4.22e-05	6.52016
42694	284131	ENDOV	endonuclease V	Hs.728933	ENSG00000173818	A_24_P361457	ref|Homo sapiens hypothetical protein FLJ35220 (FLJ35220), mRNA [NM_173627]	-0.316036	0.803274	7.22312	-8.71008	3.92e-05	0.000467828	2.31783
590	85013	TMEM128	transmembrane protein 128	Hs.12845	ENSG00000132406	A_23_P29924	ref|Homo sapiens transmembrane protein 128 (TMEM128), mRNA [NM_032927]	-0.315133	0.803777	7.47249	-7.88456	7.65e-05	0.000740711	1.58021
32716	339105	PRSS53	protease, serine, 53	Hs.569575	ENSG00000151006	A_24_P73817	ref|Homo sapiens polyserase 3 (POL3S), mRNA [NM_001039503]	-0.314513	0.804122	7.13986	-8.67108	4.04e-05	0.000478453	2.28434
17965	442582	STAG3L2	stromal antigen 3-like 2	Hs.709564	ENSG00000160828, ENSG00000205583	A_32_P170749	ref|Homo sapiens stromal antigen 3-like 2 (STAG3L2), mRNA [NM_001025202]	-0.313888	0.804471	12.6637	-12.1475	3.91e-06	0.000106741	4.8419
39521	1153	CIRBP	cold inducible RNA binding protein	Hs.618145, Hs.634522	ENSG00000099622	A_23_P377616	ref|Homo sapiens cold inducible RNA binding protein (CIRBP), transcript variant 2, transcribed RNA [NR_023312]	-0.313623	0.804619	8.09451	-5.48598	0.000776378	0.00399157	-0.971961
33090	6604	SMARCD3	SWI/SNF related, matrix associated, actin dependent regulator of chromatin, subfamily d, member 3	Hs.647067	ENSG00000082014	A_23_P122852	ref|Homo sapiens SWI/SNF related, matrix associated, actin dependent regulator of chromatin, subfamily d, member 3 (SMARCD3), transcript variant 2, mRNA [NM_003078]	-0.31354	0.804665	10.3951	-9.72446	1.85e-05	0.000286876	3.14582
25066	10724	MGEA5	meningioma expressed antigen 5 (hyaluronidase)	Hs.500842	ENSG00000198408	A_23_P202170	ref|Homo sapiens meningioma expressed antigen 5 (hyaluronidase) (MGEA5), transcript variant 1, mRNA [NM_012215]	-0.313162	0.804876	13.7524	-15.0736	8.45e-07	4.27e-05	6.49604
6556	6522	SLC4A2	solute carrier family 4, anion exchanger, member 2 (erythrocyte membrane protein band 3-like 1)	Hs.647069	ENSG00000164889	A_23_P253389	ref|Homo sapiens solute carrier family 4, anion exchanger, member 2 (erythrocyte membrane protein band 3-like 1) (SLC4A2), mRNA [NM_003040]	-0.312918	0.805012	10.9362	-14.1871	1.3e-06	5.46e-05	6.03202
6399	219988	PATL1	protein associated with topoisomerase II homolog 1 (yeast)	Hs.591960	ENSG00000166889	A_23_P373079	ref|Homo sapiens protein associated with topoisomerase II homolog 1 (yeast) (PATL1), mRNA [NM_152716]	-0.312756	0.805102	6.59626	-7.8499	7.88e-05	0.000754852	1.54785
8106	721	C4B	complement component 4B (Chido blood group)	Hs.534847, Hs.720022	ENSG00000224389, ENSG00000224639, ENSG00000228267, ENSG00000236625	A_23_P42282	ref|Homo sapiens complement component 4B (Chido blood group) (C4B), mRNA [NM_001002029]	-0.311263	0.805936	6.73264	-13.0821	2.32e-06	7.7e-05	5.41026
38791	26249	KLHL3	kelch-like 3 (Drosophila)	Hs.655084	ENSG00000146021	A_24_P374709	ref|Homo sapiens kelch-like 3 (Drosophila) (KLHL3), mRNA [NM_017415]	-0.311135	0.806007	5.83876	-13.4115	1.94e-06	6.98e-05	5.601
26998	81611	ANP32E	acidic (leucine-rich) nuclear phosphoprotein 32 family, member E	Hs.656466	ENSG00000143401	A_24_P225468	ref|Homo sapiens acidic (leucine-rich) nuclear phosphoprotein 32 family, member E (ANP32E), transcript variant 1, mRNA [NM_030920]	-0.310734	0.806231	8.19908	-11.9713	4.34e-06	0.000113432	4.7299
13265	53339	BTBD1	BTB (POZ) domain containing 1	Hs.459149	ENSG00000064726	A_23_P205830	ref|Homo sapiens BTB (POZ) domain containing 1 (BTBD1), transcript variant 1, mRNA [NM_025238]	-0.310727	0.806235	9.51949	-13.9806	1.45e-06	5.86e-05	5.91966
38297	112401	BIRC8	baculoviral IAP repeat containing 8	Hs.348263	ENSG00000163098	A_23_P90058	ref|Homo sapiens baculoviral IAP repeat-containing 8 (BIRC8), mRNA [NM_033341]	-0.310711	0.806244	4.9365	-10.8822	8.46e-06	0.000172865	4.00051
40028	3575	IL7R	interleukin 7 receptor	Hs.591742, Hs.635723	ENSG00000168685	A_23_P404494	ref|Homo sapiens interleukin 7 receptor (IL7R), mRNA [NM_002185]	-0.310578	0.806319	4.99362	-5.87222	0.000511545	0.00291421	-0.513568
35410	84932	RAB2B	RAB2B, member RAS oncogene family	Hs.22399	ENSG00000129472	A_23_P65466	ref|Homo sapiens RAB2B, member RAS oncogene family (RAB2B), mRNA [NM_032846]	-0.310502	0.806361	5.99513	-5.57428	0.000704559	0.00372195	-0.865391
27752	80230	RUFY1	RUN and FYVE domain containing 1	Hs.306769	ENSG00000176783	A_23_P73457	ref|Homo sapiens RUN and FYVE domain containing 1 (RUFY1), transcript variant 1, mRNA [NM_025158]	-0.310089	0.806592	11.6159	-13.7729	1.61e-06	6.26e-05	5.80491
25812	51207	DUSP13	dual specificity phosphatase 13	Hs.178170	ENSG00000079393	A_23_P104471	ref|Homo sapiens dual specificity phosphatase 13 (DUSP13), transcript variant 1, mRNA [NM_001007271]	-0.309623	0.806852	6.04257	-9.94186	1.58e-05	0.000259246	3.31319
38310	54758	KLHDC4	kelch domain containing 4	Hs.123450	ENSG00000104731	A_23_P163801	ref|Homo sapiens kelch domain containing 4 (KLHDC4), mRNA [NM_017566]	-0.309374	0.806992	9.46355	-14.7456	9.89e-07	4.69e-05	6.32773
29227	172	AFG3L1P	AFG3 ATPase family gene 3-like 1 (S. cerevisiae), pseudogene	Hs.534773	NA	A_23_P355289	ref|Homo sapiens AFG3 ATPase family gene 3-like 1 (S. cerevisiae) (AFG3L1), transcript variant 1, non-coding RNA [NR_003226]	-0.309127	0.80713	12.636	-7.89706	7.57e-05	0.000735394	1.59185
18677	55114	ARHGAP17	Rho GTPase activating protein 17	Hs.373793	ENSG00000140750	A_24_P401739	ref|Homo sapiens Rho GTPase activating protein 17 (ARHGAP17), transcript variant 1, mRNA [NM_001006634]	-0.308959	0.807224	9.30735	-12.6287	2.98e-06	9.07e-05	5.13972
1672	2005	ELK4	ELK4, ETS-domain protein (SRF accessory protein 1)	Hs.497520, Hs.602654, Hs.644788	ENSG00000158711	A_23_P161098	ref|Homo sapiens ELK4, ETS-domain protein (SRF accessory protein 1) (ELK4), transcript variant a, mRNA [NM_001973]	-0.308889	0.807263	6.21971	-11.2037	6.91e-06	0.000151915	4.22283
33279	5600	MAPK11	mitogen-activated protein kinase 11	Hs.57732	ENSG00000185386	A_23_P502274	ref|Homo sapiens mitogen-activated protein kinase 11 (MAPK11), mRNA [NM_002751]	-0.308843	0.807289	9.38991	-13.6812	1.69e-06	6.42e-05	5.7537
42628	10233	LRRC23	leucine rich repeat containing 23	Hs.155586	ENSG00000010626	A_23_P36689	ref|Homo sapiens leucine rich repeat containing 23 (LRRC23), transcript variant 2, mRNA [NM_006992]	-0.308699	0.807369	7.2769	-13.0626	2.34e-06	7.73e-05	5.39883
34940	399512	SLC25A35	solute carrier family 25, member 35	Hs.118918	ENSG00000125434	A_23_P366726	ref|Homo sapiens solute carrier family 25, member 35 (SLC25A35), mRNA [NM_201520]	-0.308496	0.807483	8.08776	-13.3246	2.03e-06	7.17e-05	5.55116
6125	284186	TMEM105	transmembrane protein 105	Hs.364191	ENSG00000185332	A_32_P919718	ref|Homo sapiens transmembrane protein 105 (TMEM105), mRNA [NM_178520]	-0.308463	0.807502	6.63372	-11.1142	7.31e-06	0.000157255	4.16158
5484	8692	HYAL2	hyaluronoglucosaminidase 2	Hs.76873	ENSG00000068001	A_23_P57927	ref|Homo sapiens hyaluronoglucosaminidase 2 (HYAL2), transcript variant 1, mRNA [NM_003773]	-0.308421	0.807525	10.0394	-8.75269	3.79e-05	0.000456953	2.35426
4853	197187	MGC23284	hypothetical LOC197187	Hs.499548	NA	A_23_P406227	ref|Homo sapiens hypothetical LOC197187 (MGC23284), transcript variant 2, non-coding RNA [NR_024399]	-0.307879	0.807829	8.30492	-8.13712	6.2e-05	0.00063832	1.81249
16023	55716	LMBR1L	limb region 1 homolog (mouse)-like	Hs.272838	ENSG00000139636	A_23_P150931	ref|Homo sapiens limb region 1 homolog (mouse)-like (LMBR1L), mRNA [NM_018113]	-0.307633	0.807966	8.28453	-9.67989	1.91e-05	0.000292529	3.11108
16930	329	BIRC2	baculoviral IAP repeat containing 2	Hs.696238	ENSG00000110330	A_24_P115774	ref|Homo sapiens baculoviral IAP repeat-containing 2 (BIRC2), mRNA [NM_001166]	-0.307477	0.808054	8.78101	-14.5274	1.1e-06	4.98e-05	6.21361
24633	55561	CDC42BPG	CDC42 binding protein kinase gamma (DMPK-like)	Hs.293590	ENSG00000171219	A_24_P249626	ref|Homo sapiens CDC42 binding protein kinase gamma (DMPK-like) (CDC42BPG), mRNA [NM_017525]	-0.307281	0.808164	5.7697	-14.7728	9.76e-07	4.66e-05	6.34183
35620	83637	ZMIZ2	zinc finger, MIZ-type containing 2	Hs.600681, Hs.77978	ENSG00000122515	A_24_P315066	ref|Homo sapiens zinc finger, MIZ-type containing 2 (ZMIZ2), transcript variant 1, mRNA [NM_031449]	-0.307267	0.808171	7.90261	-9.43554	2.27e-05	0.000328899	2.91807
16189	26472	PPP1R14B	protein phosphatase 1, regulatory (inhibitor) subunit 14B	Hs.523760, Hs.596713	ENSG00000173457	A_24_P417984	ref|Homo sapiens protein phosphatase 1, regulatory (inhibitor) subunit 14B (PPP1R14B), mRNA [NM_138689]	-0.307214	0.808201	12.3892	-10.061	1.46e-05	0.000244863	3.40351
30564	50484	RRM2B	ribonucleotide reductase M2 B (TP53 inducible)	Hs.512592	ENSG00000048392	A_23_P20225	ref|Homo sapiens ribonucleotide reductase M2 B (TP53 inducible) (RRM2B), mRNA [NM_015713]	-0.306338	0.808692	6.13727	-13.5083	1.85e-06	6.82e-05	5.65619
38755	733	C8G	complement component 8, gamma polypeptide	Hs.1285	ENSG00000176919	A_23_P20713	ref|Homo sapiens complement component 8, gamma polypeptide (C8G), mRNA [NM_000606]	-0.305636	0.809086	7.01308	-10.8988	8.38e-06	0.000171931	4.01212
36942	28514	DLL1	delta-like 1 (Drosophila)	Hs.379912	ENSG00000198719	A_23_P167920	ref|Homo sapiens delta-like 1 (Drosophila) (DLL1), mRNA [NM_005618]	-0.305108	0.809382	7.23961	-14.3261	1.21e-06	5.27e-05	6.10672
31431	5547	PRCP	prolylcarboxypeptidase (angiotensinase C)	Hs.523936	ENSG00000137509	A_23_P127964	ref|Homo sapiens prolylcarboxypeptidase (angiotensinase C) (PRCP), transcript variant 2, mRNA [NM_199418]	-0.304579	0.809678	13.2204	-14.6865	1.02e-06	4.79e-05	6.297
30189	10135	NAMPT	nicotinamide phosphoribosyltransferase	Hs.489615	ENSG00000105835	A_24_P408772	ref|Homo sapiens nicotinamide phosphoribosyltransferase (NAMPT), mRNA [NM_005746]	-0.304097	0.809949	11.2443	-13.762	1.62e-06	6.28e-05	5.79887
15111	100499466	LOC100499466	hypothetical LOC100499466	Hs.591212, Hs.647405	NA	A_24_P484894	gb|Homo sapiens cDNA clone IMAGE:4797078. [BC045718]	-0.303774	0.81013	9.8661	-12.3004	3.58e-06	0.000101671	4.93774
21297	8544	PIR	pirin (iron-binding nuclear protein)	Hs.495728	ENSG00000087842	A_23_P137035	ref|Homo sapiens pirin (iron-binding nuclear protein) (PIR), transcript variant 1, mRNA [NM_003662]	-0.303641	0.810205	9.47023	-13.2961	2.07e-06	7.2e-05	5.53471
25538	440026	TMEM41B	transmembrane protein 41B	Hs.594563	ENSG00000166471	A_32_P173058	ref|Homo sapiens transmembrane protein 41B (TMEM41B), mRNA [NM_015012]	-0.303554	0.810254	9.47821	-13.4528	1.9e-06	6.91e-05	5.62457
7864	100272216	LOC100272216	hypothetical LOC100272216	Hs.662074	NA	A_24_P409904	gb|Homo sapiens cDNA FLJ27195 fis, clone SYN02786. [AK130705]	-0.303528	0.810268	9.61205	-6.9563	0.000174446	0.00133171	0.671433
40781	79150	MGC4859	hypothetical LOC79150	Hs.571301	NA	A_24_P709536	gb|Homo sapiens hypothetical protein MGC4859 similar to HSPA8, mRNA (cDNA clone IMAGE:3605453), partial cds. [BC002644]	-0.30332	0.810386	4.87469	-7.93622	7.33e-05	0.000718567	1.62822
13622	83592	AKR1E2	aldo-keto reductase family 1, member E2	Hs.657944	ENSG00000165568	A_23_P1322	gb|Homo sapiens mRNA for aldo-keto reductase related protein 1, complete cds. [AB040820]	-0.302666	0.810753	8.95528	-12.2102	3.77e-06	0.000104351	4.88135
29075	8943	AP3D1	adaptor-related protein complex 3, delta 1 subunit	Hs.512815	ENSG00000065000	A_23_P119526	ref|Homo sapiens adaptor-related protein complex 3, delta 1 subunit (AP3D1), transcript variant 2, mRNA [NM_003938]	-0.301847	0.811213	10.1853	-7.74187	8.64e-05	0.000804767	1.44627
39286	142678	MIB2	mindbomb homolog 2 (Drosophila)	Hs.135805, Hs.593430	ENSG00000197530	A_24_P259328	ref|Homo sapiens mindbomb homolog 2 (Drosophila) (MIB2), mRNA [NM_080875]	-0.301819	0.811229	8.79315	-9.51581	2.14e-05	0.000317425	2.98197
19554	139728	PNCK	pregnancy up-regulated non-ubiquitously expressed CaM kinase	Hs.436667	ENSG00000130822	A_23_P62377	ref|Homo sapiens pregnancy up-regulated non-ubiquitously expressed CaM kinase (PNCK), transcript variant 1, mRNA [NM_001039582]	-0.301413	0.811457	5.70377	-6.7705	0.000207835	0.00151717	0.478352
16592	65123	INTS3	integrator complex subunit 3	Hs.516522	ENSG00000256921, ENSG00000143624	A_23_P126757	ref|Homo sapiens integrator complex subunit 3 (INTS3), mRNA [NM_023015]	-0.30125	0.811549	10.1461	-12.8312	2.66e-06	8.37e-05	5.2617
43180	10463	SLC30A9	solute carrier family 30 (zinc transporter), member 9	Hs.479634	ENSG00000014824	A_23_P30050	ref|Homo sapiens solute carrier family 30 (zinc transporter), member 9 (SLC30A9), mRNA [NM_006345]	-0.300888	0.811752	8.24877	-11.1436	7.17e-06	0.000155387	4.18171
26243	25764	C15orf63	chromosome 15 open reading frame 63	NA	ENSG00000242028	A_23_P117683	ref|Homo sapiens Huntingtin interacting protein K (HYPK), mRNA [NM_016400]	-0.300881	0.811756	12.199	-14.1508	1.33e-06	5.51e-05	6.01243
8291	58488	PCTP	phosphatidylcholine transfer protein	Hs.285218	ENSG00000141179	A_23_P4041	ref|Homo sapiens phosphatidylcholine transfer protein (PCTP), transcript variant 1, mRNA [NM_021213]	-0.300713	0.811851	8.31006	-13.076	2.33e-06	7.7e-05	5.40666
2743	55300	PI4K2B	phosphatidylinositol 4-kinase type 2 beta	Hs.191701	ENSG00000038210	A_23_P18598	ref|Homo sapiens phosphatidylinositol 4-kinase type 2 beta (PI4K2B), mRNA [NM_018323]	-0.300606	0.811911	8.96272	-14.0713	1.38e-06	5.67e-05	5.96921
17252	79758	DHRS12	dehydrogenase/reductase (SDR family) member 12	Hs.266728	ENSG00000102796	A_23_P205200	ref|Homo sapiens dehydrogenase/reductase (SDR family) member 12 (DHRS12), transcript variant 2, mRNA [NM_024705]	-0.300579	0.811926	7.18952	-12.6326	2.97e-06	9.06e-05	5.14206
42492	118491	TTC18	tetratricopeptide repeat domain 18	Hs.591367, Hs.720588	ENSG00000156042	A_23_P326931	ref|Homo sapiens tetratricopeptide repeat domain 18 (TTC18), mRNA [NM_145170]	-0.300243	0.812115	5.55005	-8.26635	5.58e-05	0.000594313	1.92903
24292	283234	CCDC88B	coiled-coil domain containing 88B	Hs.98564	ENSG00000168071	A_23_P24389	ref|Homo sapiens coiled-coil domain containing 88B (CCDC88B), mRNA [NM_032251]	-0.300221	0.812128	7.44608	-6.8503	0.00019269	0.00143638	0.561763
29367	4489	MT1A	metallothionein 1A	Hs.655199	ENSG00000205362	A_23_P54840	ref|Homo sapiens metallothionein 1A (MT1A), mRNA [NM_005946]	-0.298815	0.81292	14.6071	-8.95275	3.25e-05	0.000412957	2.52333
25661	7167	TPI1	triosephosphate isomerase 1	Hs.524219	ENSG00000111669	A_32_P95739	ref|Homo sapiens triosephosphate isomerase 1 (TPI1), mRNA [NM_000365]	-0.298686	0.812993	12.7076	-13.3229	2.04e-06	7.17e-05	5.55017
22123	56204	KIAA1370	KIAA1370	Hs.152385	ENSG00000047346	A_23_P99853	ref|Homo sapiens KIAA1370 (KIAA1370), mRNA [NM_019600]	-0.2985	0.813097	7.98079	-9.62938	1.97e-05	0.000299745	3.07154
808	26063	DECR2	2,4-dienoyl CoA reductase 2, peroxisomal	Hs.628831	ENSG00000242612	A_23_P100315	ref|Homo sapiens 2,4-dienoyl CoA reductase 2, peroxisomal (DECR2), mRNA [NM_020664]	-0.298491	0.813102	10.587	-14.5062	1.11e-06	5e-05	6.20242
16684	84033	OBSCN	obscurin, cytoskeletal calmodulin and titin-interacting RhoGEF	Hs.650039, Hs.656999	ENSG00000154358	A_24_P119685	ref|Homo sapiens obscurin, cytoskeletal calmodulin and titin-interacting RhoGEF (OBSCN), transcript variant 1, mRNA [NM_052843]	-0.29838	0.813165	6.89459	-11.3998	6.12e-06	0.000141352	4.35549
27177	54963	UCKL1	uridine-cytidine kinase 1-like 1	Hs.504998	ENSG00000198276	A_23_P17330	ref|Homo sapiens uridine-cytidine kinase 1-like 1 (UCKL1), mRNA [NM_017859]	-0.29797	0.813396	8.44837	-14.2264	1.28e-06	5.39e-05	6.05323
38959	169981	SPIN3	spindlin family, member 3	Hs.522672	ENSG00000204271	A_24_P494454	ref|Homo sapiens spindlin family, member 3 (SPIN3), mRNA [NM_001010862]	-0.297883	0.813445	8.84228	-11.5596	5.55e-06	0.000132228	4.46197
40115	91875	TTC5	tetratricopeptide repeat domain 5	Hs.98553	ENSG00000136319	A_23_P88280	ref|Homo sapiens tetratricopeptide repeat domain 5 (TTC5), mRNA [NM_138376]	-0.297713	0.813541	6.62583	-6.12839	0.000391904	0.0024024	-0.22043
14816	81609	SNX27	sorting nexin family member 27	Hs.192326	ENSG00000143376	A_23_P201238	ref|Homo sapiens sorting nexin family member 27 (SNX27), mRNA [NM_030918]	-0.297712	0.813541	7.51629	-13.4571	1.9e-06	6.9e-05	5.62703
35401	94241	TP53INP1	tumor protein p53 inducible nuclear protein 1	Hs.492261	ENSG00000164938	A_23_P168882	ref|Homo sapiens tumor protein p53 inducible nuclear protein 1 (TP53INP1), transcript variant 1, mRNA [NM_033285]	-0.297664	0.813569	8.41581	-11.5604	5.55e-06	0.000132228	4.4625
9333	80145	THOC7	THO complex 7 homolog (Drosophila)	Hs.288151	ENSG00000163634	A_32_P136402	ref|Homo sapiens THO complex 7 homolog (Drosophila) (THOC7), mRNA [NM_025075]	-0.297298	0.813775	9.91635	-10.856	8.61e-06	0.000174813	3.98209
29666	4590	MUC8	mucin 8	Hs.592357	NA	A_24_P32203	ens|Mucin Fragment [Source:UniProtKB/TrEMBL;Acc:Q12964] [ENST00000397321]	-0.297182	0.81384	5.91069	-11.9531	4.39e-06	0.00011426	4.71824
40427	122622	ADSSL1	adenylosuccinate synthase like 1	Hs.592327	ENSG00000185100	A_23_P76823	ref|Homo sapiens adenylosuccinate synthase like 1 (ADSSL1), transcript variant 1, mRNA [NM_199165]	-0.295584	0.814743	7.86712	-8.91523	3.35e-05	0.000421106	2.49187
21191	6872	TAF1	TAF1 RNA polymerase II, TATA box binding protein (TBP)-associated factor, 250kDa	Hs.158560	ENSG00000147133	A_23_P11237	ref|Homo sapiens TAF1 RNA polymerase II, TATA box binding protein (TBP)-associated factor, 250kDa (TAF1), transcript variant 1, mRNA [NM_004606]	-0.295279	0.814915	8.42307	-12.9331	2.51e-06	8.09e-05	5.32237
6794	80127	C14orf45	chromosome 14 open reading frame 45	Hs.644621	ENSG00000119636	A_23_P76983	ref|Homo sapiens chromosome 14 open reading frame 45 (C14orf45), mRNA [NM_025057]	-0.294798	0.815187	5.83242	-8.41499	4.95e-05	0.000546242	2.0612
21346	84628	NTNG2	netrin G2	Hs.163642	ENSG00000196358	A_23_P423331	ref|Homo sapiens netrin G2 (NTNG2), mRNA [NM_032536]	-0.294489	0.815361	8.32866	-8.50981	4.59e-05	0.000518818	2.14449
36828	55160	ARHGEF10L	Rho guanine nucleotide exchange factor (GEF) 10-like	Hs.443460	ENSG00000074964	A_23_P382	ref|Homo sapiens Rho guanine nucleotide exchange factor (GEF) 10-like (ARHGEF10L), transcript variant 1, mRNA [NM_018125]	-0.29429	0.815474	8.55945	-8.03183	6.76e-05	0.000679932	1.71638
38302	51184	GPN3	GPN-loop GTPase 3	Hs.634680	ENSG00000111231	A_23_P116999	ref|Homo sapiens GPN-loop GTPase 3 (GPN3), mRNA [NM_016301]	-0.294279	0.81548	8.56659	-3.3288	0.0117259	0.0325082	-3.91398
28939	135154	C6orf57	chromosome 6 open reading frame 57	Hs.418495	ENSG00000154079	A_23_P256279	ref|Homo sapiens chromosome 6 open reading frame 57 (C6orf57), mRNA [NM_145267]	-0.293628	0.815848	10.4213	-14.2378	1.27e-06	5.39e-05	6.05937
18651	10347	ABCA7	ATP-binding cassette, sub-family A (ABC1), member 7	Hs.134514	ENSG00000064687	A_23_P39481	ref|Homo sapiens ATP-binding cassette, sub-family A (ABC1), member 7 (ABCA7), mRNA [NM_019112]	-0.293219	0.816079	9.32178	-6.96648	0.000172798	0.00132309	0.681899
36409	6894	TARBP1	TAR (HIV-1) RNA binding protein 1	Hs.498115	ENSG00000059588	A_23_P52058	ref|Homo sapiens TAR (HIV-1) RNA binding protein 1 (TARBP1), mRNA [NM_005646]	-0.292155	0.816681	10.4852	-10.6813	9.64e-06	0.000187957	3.8584
1269	3150	HMGN1	high mobility group nucleosome binding domain 1	Hs.356285	ENSG00000205581	A_32_P22263	ref|Homo sapiens high-mobility group nucleosome binding domain 1 (HMGN1), mRNA [NM_004965]	-0.292077	0.816725	10.5052	-13.3701	1.99e-06	7.06e-05	5.57728
30324	317781	DDX51	DEAD (Asp-Glu-Ala-Asp) box polypeptide 51	Hs.445168	ENSG00000185163	A_23_P364537	ref|Homo sapiens DEAD (Asp-Glu-Ala-Asp) box polypeptide 51 (DDX51), mRNA [NM_175066]	-0.290892	0.817396	9.39468	-13.2363	2.13e-06	7.37e-05	5.50014
39870	200261	LOC200261	hypothetical LOC200261	Hs.352228	NA	A_24_P365955	gb|Homo sapiens PP4277 mRNA, complete cds. [AF258576]	-0.290868	0.81741	4.86086	-5.27215	0.000986336	0.00478186	-1.2345
30654	79963	ABCA11P	ATP-binding cassette, sub-family A (ABC1), member 11, pseudogene	Hs.428360	NA	A_23_P92602	ref|Homo sapiens ATP-binding cassette, sub-family A (ABC1), member 11 (pseudogene) (ABCA11P), non-coding RNA [NR_002451]	-0.290597	0.817564	6.98896	-9.41607	2.3e-05	0.00033146	2.90251
28194	487	ATP2A1	ATPase, Ca++ transporting, cardiac muscle, fast twitch 1	Hs.657344	ENSG00000196296	A_23_P72462	ref|Homo sapiens ATPase, Ca++ transporting, cardiac muscle, fast twitch 1 (ATP2A1), transcript variant a, mRNA [NM_173201]	-0.290596	0.817564	6.23592	-12.6799	2.89e-06	8.89e-05	5.17075
9187	84680	ACCS	1-aminocyclopropane-1-carboxylate synthase homolog (Arabidopsis)(non-functional)	Hs.126706	ENSG00000110455	A_23_P24586	ref|Homo sapiens 1-aminocyclopropane-1-carboxylate synthase homolog (Arabidopsis)(non-functional) (ACCS), transcript variant 1, mRNA [NM_032592]	-0.28935	0.818271	7.74234	-9.03609	3.05e-05	0.000396883	2.59278
20420	284904	SEC14L4	SEC14-like 4 (S. cerevisiae)	Hs.517541	ENSG00000133488	A_23_P421032	ref|Homo sapiens SEC14-like 4 (S. cerevisiae) (SEC14L4), mRNA [NM_174977]	-0.288455	0.818778	8.05699	-12.2078	3.78e-06	0.000104428	4.87985
32165	84319	C3orf26	chromosome 3 open reading frame 26	Hs.655111	ENSG00000184220	A_23_P132874	ref|Homo sapiens chromosome 3 open reading frame 26 (C3orf26), mRNA [NM_032359]	-0.28814	0.818957	10.8367	-8.20151	5.88e-05	0.000615546	1.87074
17481	5281	PIGF	phosphatidylinositol glycan anchor biosynthesis, class F	Hs.468415	ENSG00000151665	A_23_P131653	ref|Homo sapiens phosphatidylinositol glycan anchor biosynthesis, class F (PIGF), transcript variant 1, mRNA [NM_002643]	-0.28762	0.819253	10.0073	-13.5044	1.85e-06	6.82e-05	5.65393
21205	4157	MC1R	melanocortin 1 receptor (alpha melanocyte stimulating hormone receptor)	Hs.513829	NA	A_23_P66095	ref|Homo sapiens melanocortin 1 receptor (alpha melanocyte stimulating hormone receptor) (MC1R), mRNA [NM_002386]	-0.287534	0.819301	8.08246	-9.68265	1.9e-05	0.000292234	3.11324
40939	1261	CNGA3	cyclic nucleotide gated channel alpha 3	Hs.234785	ENSG00000144191	A_23_P68167	ref|Homo sapiens cyclic nucleotide gated channel alpha 3 (CNGA3), transcript variant 1, mRNA [NM_001298]	-0.286778	0.81973	4.89862	-4.78895	0.00173376	0.0073362	-1.85154
18205	81557	MAGED4B	melanoma antigen family D, 4B	Hs.522650, Hs.571729	ENSG00000187243, ENSG00000154545	A_23_P159907	ref|Homo sapiens melanoma antigen family D, 4B (MAGED4B), transcript variant 1, mRNA [NM_030801]	-0.286715	0.819766	9.28964	-8.66187	4.07e-05	0.000480707	2.27641
38513	10325	RRAGB	Ras-related GTP binding B	Hs.50282	ENSG00000083750	A_23_P73721	ref|Homo sapiens Ras-related GTP binding B (RRAGB), transcript variant RAGBl, mRNA [NM_016656]	-0.286547	0.819862	7.80232	-12.5654	3.08e-06	9.25e-05	5.10119
3862	654433	LOC654433	hypothetical LOC654433	Hs.656660	NA	A_24_P885873	gb|Homo sapiens cDNA FLJ44467 fis, clone UTERU2025891. [AK126431]	-0.286224	0.820046	7.48815	-10.7718	9.09e-06	0.000181111	3.92275
40714	89765	RSPH1	radial spoke head 1 homolog (Chlamydomonas)	Hs.661069	ENSG00000160188	A_23_P102950	ref|Homo sapiens radial spoke head 1 homolog (Chlamydomonas) (RSPH1), mRNA [NM_080860]	-0.286132	0.820098	6.51464	-10.0069	1.52e-05	0.000251611	3.3626
23656	84445	LZTS2	leucine zipper, putative tumor suppressor 2	Hs.523221	ENSG00000107816	A_23_P149852	ref|Homo sapiens leucine zipper, putative tumor suppressor 2 (LZTS2), mRNA [NM_032429]	-0.286038	0.820152	10.2283	-13.4474	1.91e-06	6.93e-05	5.62148
37641	126272	EID2B	EP300 interacting inhibitor of differentiation 2B	Hs.135181	ENSG00000176401	A_23_P368259	ref|Homo sapiens EP300 interacting inhibitor of differentiation 2B (EID2B), mRNA [NM_152361]	-0.285648	0.820373	7.1988	-9.70634	1.87e-05	0.000289545	3.13171
1297	7059	THBS3	thrombospondin 3	Hs.169875, Hs.658188	ENSG00000169231	A_23_P201047	ref|Homo sapiens thrombospondin 3 (THBS3), mRNA [NM_007112]	-0.284621	0.820957	9.7949	-12.0415	4.16e-06	0.000110927	4.77473
1600	4144	MAT2A	methionine adenosyltransferase II, alpha	Hs.516157	ENSG00000168906	A_23_P401568	ref|Homo sapiens methionine adenosyltransferase II, alpha (MAT2A), mRNA [NM_005911]	-0.284616	0.82096	12.7496	-11.6359	5.3e-06	0.000129165	4.51234
18054	574407	C1orf145	chromosome 1 open reading frame 145	Hs.650039	NA	A_24_P15898	gb|Homo sapiens chromosome 1 open reading frame 145, mRNA (cDNA clone IMAGE:5204063), partial cds. [BC027909]	-0.284494	0.82103	5.77187	-8.94931	3.26e-05	0.000413796	2.52045
4338	23185	LARP4B	La ribonucleoprotein domain family, member 4B	Hs.631814	ENSG00000107929	A_23_P405942	ref|Homo sapiens La ribonucleoprotein domain family, member 5 (LARP5), mRNA [NM_015155]	-0.284383	0.821093	10.6388	-12.6975	2.86e-06	8.85e-05	5.1814
7299	92370	ACPL2	acid phosphatase-like 2	Hs.657887	ENSG00000155893	A_23_P57760	ref|Homo sapiens acid phosphatase-like 2 (ACPL2), transcript variant 1, mRNA [NM_152282]	-0.284221	0.821185	7.5795	-10.0331	1.49e-05	0.00024795	3.38248
37140	10570	DPYSL4	dihydropyrimidinase-like 4	Hs.100058	ENSG00000151640	A_23_P331049	ref|Homo sapiens dihydropyrimidinase-like 4 (DPYSL4), mRNA [NM_006426]	-0.283625	0.821524	6.48701	-10.3182	1.23e-05	0.000218514	3.59516
12428	8473	OGT	O-linked N-acetylglucosamine (GlcNAc) transferase (UDP-N-acetylglucosamine:polypeptide-N-acetylglucosaminyl transferase)	Hs.405410	ENSG00000147162	A_23_P381976	ref|Homo sapiens O-linked N-acetylglucosamine (GlcNAc) transferase (UDP-N-acetylglucosamine:polypeptide-N-acetylglucosaminyl transferase) (OGT), transcript variant 1, mRNA [NM_181672]	-0.28359	0.821544	10.1508	-9.12788	2.85e-05	0.00038025	2.66864
33146	56998	CTNNBIP1	catenin, beta interacting protein 1	Hs.463759	ENSG00000178585	A_23_P23584	ref|Homo sapiens catenin, beta interacting protein 1 (CTNNBIP1), transcript variant 1, mRNA [NM_020248]	-0.283543	0.821571	9.15618	-11.1705	7.05e-06	0.000153708	4.20015
41503	100144602	LOC100144602	hypothetical LOC100144602	Hs.201854	NA	A_32_P42705	gb|Homo sapiens hypothetical, mRNA (cDNA clone IMAGE:4429392), partial cds. [BC017721]	-0.283395	0.821655	5.01085	-5.28646	0.00097047	0.00472565	-1.21673
15204	497190	CLEC18B	C-type lectin domain family 18, member B	Hs.454670, Hs.556045, Hs.592064	ENSG00000140839	A_23_P206501	ref|Homo sapiens secretory protein LOC497190 (LOC497190), mRNA [NM_001011880]	-0.28312	0.821812	7.36198	-12.4796	3.24e-06	9.53e-05	5.04861
24333	5795	PTPRJ	protein tyrosine phosphatase, receptor type, J	Hs.318547	ENSG00000149177	A_24_P282434	ref|Homo sapiens protein tyrosine phosphatase, receptor type, J (PTPRJ), transcript variant 1, mRNA [NM_002843]	-0.282862	0.821959	8.5224	-9.90266	1.63e-05	0.000264101	3.28326
25086	388115	C15orf52	chromosome 15 open reading frame 52	Hs.32433	ENSG00000188549	A_23_P163475	ref|Homo sapiens chromosome 15 open reading frame 52 (C15orf52), mRNA [NM_207380]	-0.282791	0.821999	9.21847	-9.98752	1.54e-05	0.000254027	3.34792
16014	7637	ZNF84	zinc finger protein 84	Hs.445019	ENSG00000198040, ENSG00000218497	A_23_P105276	ref|Homo sapiens zinc finger protein 84 (ZNF84), transcript variant 1, mRNA [NM_003428]	-0.282336	0.822259	8.36719	-13.1105	2.28e-06	7.67e-05	5.42692
30254	5999	RGS4	regulator of G-protein signaling 4	Hs.386726	ENSG00000117152	A_23_P433855	ref|Homo sapiens regulator of G-protein signaling 4 (RGS4), transcript variant 2, mRNA [NM_005613]	-0.282288	0.822286	12.3536	-12.3239	3.54e-06	0.000100816	4.95241
12912	84197	SGK196	protein kinase-like protein SgK196	Hs.491646	ENSG00000185900	A_23_P83835	ref|Homo sapiens protein kinase-like protein SgK196 (SGK196), mRNA [NM_032237]	-0.282022	0.822438	11.0116	-12.9304	2.52e-06	8.09e-05	5.32082
1245	4058	LTK	leukocyte receptor tyrosine kinase	Hs.434481	ENSG00000062524	A_23_P14853	ref|Homo sapiens leukocyte receptor tyrosine kinase (LTK), transcript variant 1, mRNA [NM_002344]	-0.281933	0.822488	5.83495	-8.13872	6.19e-05	0.000637782	1.81394
13113	27243	CHMP2A	chromatin modifying protein 2A	Hs.12107	ENSG00000130724	A_23_P153236	ref|Homo sapiens chromatin modifying protein 2A (CHMP2A), transcript variant 1, mRNA [NM_014453]	-0.281919	0.822496	11.2339	-12.3231	3.54e-06	0.000100816	4.95185
12274	4238	MFAP3	microfibrillar-associated protein 3	Hs.432818	ENSG00000037749	A_24_P217758	ref|Homo sapiens microfibrillar-associated protein 3 (MFAP3), transcript variant 1, mRNA [NM_005927]	-0.281872	0.822523	8.16102	-9.64914	1.95e-05	0.000296688	3.08703
32417	83641	FAM107B	family with sequence similarity 107, member B	Hs.446315	ENSG00000065809	A_23_P149975	ref|Homo sapiens family with sequence similarity 107, member B (FAM107B), mRNA [NM_031453]	-0.281802	0.822563	8.96244	-11.6088	5.38e-06	0.000130345	4.49448
20564	4496	MT1H	metallothionein 1H	Hs.438462	ENSG00000205358	A_23_P414343	ref|Homo sapiens metallothionein 1H (MT1H), mRNA [NM_005951]	-0.281698	0.822622	14.3436	-10.0338	1.49e-05	0.00024795	3.38301
31864	25970	SH2B1	SH2B adaptor protein 1	Hs.15744	ENSG00000178188	A_24_P185029	ref|Homo sapiens SH2B adaptor protein 1 (SH2B1), mRNA [NM_015503]	-0.281685	0.82263	7.45672	-11.1221	7.27e-06	0.000156712	4.16699
38944	65244	SPATS2	spermatogenesis associated, serine-rich 2	Hs.654826	ENSG00000123352	A_23_P99303	ref|Homo sapiens spermatogenesis associated, serine-rich 2 (SPATS2), mRNA [NM_023071]	-0.28135	0.822821	7.69945	-11.2562	6.68e-06	0.000148693	4.25856
25227	2550	GABBR1	gamma-aminobutyric acid (GABA) B receptor, 1	Hs.167017	ENSG00000232569, ENSG00000237051, ENSG00000206466, ENSG00000237112, ENSG00000204681, ENSG00000206511, ENSG00000232632	A_23_P93302	ref|Homo sapiens gamma-aminobutyric acid (GABA) B receptor, 1 (GABBR1), transcript variant 1, mRNA [NM_001470]	-0.281331	0.822831	7.29959	-12.535	3.14e-06	9.35e-05	5.08263
27954	10725	NFAT5	nuclear factor of activated T-cells 5, tonicity-responsive	Hs.371987	ENSG00000102908	A_23_P359647	ref|Homo sapiens nuclear factor of activated T-cells 5, tonicity-responsive (NFAT5), transcript variant 1, mRNA [NM_138714]	-0.281036	0.823	11.2906	-11.5133	5.71e-06	0.000134746	4.43122
34306	7574	ZNF26	zinc finger protein 26	Hs.489608	ENSG00000198393, ENSG00000236575	A_23_P128060	ref|Homo sapiens zinc finger protein 26 (ZNF26), mRNA [NM_019591]	-0.280876	0.823091	8.87883	-9.35783	2.4e-05	0.000341016	2.85576
25027	57577	KIAA1407	KIAA1407	Hs.477159	ENSG00000163617	A_32_P54616	ref|Homo sapiens KIAA1407 (KIAA1407), mRNA [NM_020817]	-0.280371	0.82338	6.72457	-10.5386	1.06e-05	0.000198899	3.75602
28594	114794	ELFN2	extracellular leucine-rich repeat and fibronectin type III domain containing 2	Hs.660812, Hs.716143	ENSG00000166897	A_32_P219279	ref|Homo sapiens extracellular leucine-rich repeat and fibronectin type III domain containing 2 (ELFN2), mRNA [NM_052906]	-0.280289	0.823426	6.65334	-12.0271	4.2e-06	0.000111607	4.76556
21848	100128239	LOC100128239	hypothetical LOC100128239	Hs.423734	NA	A_32_P115438	gb|Homo sapiens cDNA FLJ43312 fis, clone NT2RI2012659. [AK125302]	-0.280012	0.823584	5.58871	-12.5129	3.18e-06	9.44e-05	5.06905
42841	23275	POFUT2	protein O-fucosyltransferase 2	Hs.592164	ENSG00000186866	A_24_P139229	ref|Homo sapiens protein O-fucosyltransferase 2 (POFUT2), transcript variant 3, mRNA [NM_133635]	-0.279706	0.823759	10.3458	-13.1581	2.22e-06	7.54e-05	5.45472
17660	602	BCL3	B-cell CLL/lymphoma 3	Hs.31210	ENSG00000069399	A_23_P4662	ref|Homo sapiens B-cell CLL/lymphoma 3 (BCL3), mRNA [NM_005178]	-0.279686	0.82377	9.71001	-12.6699	2.91e-06	8.93e-05	5.16471
9897	27148	STK36	serine/threonine kinase 36	Hs.471404, Hs.712986	ENSG00000163482	A_23_P335905	ref|Homo sapiens serine/threonine kinase 36, fused homolog (Drosophila) (STK36), mRNA [NM_015690]	-0.27957	0.823837	6.65515	-11.84	4.69e-06	0.000119208	4.64541
40021	93058	COQ10A	coenzyme Q10 homolog A (S. cerevisiae)	Hs.4096	ENSG00000135469	A_23_P354798	ref|Homo sapiens coenzyme Q10 homolog A (S. cerevisiae) (COQ10A), transcript variant 1, mRNA [NM_144576]	-0.279114	0.824097	8.00994	-10.1657	1.36e-05	0.000233637	3.4821
10905	57639	CCDC146	coiled-coil domain containing 146	Hs.113940	ENSG00000135205	A_23_P168771	ref|Homo sapiens coiled-coil domain containing 146 (CCDC146), mRNA [NM_020879]	-0.278977	0.824175	6.97632	-12.7102	2.84e-06	8.81e-05	5.18908
10286	2686	GGT7	gamma-glutamyltransferase 7	Hs.433738	ENSG00000131067	A_23_P325093	ref|Homo sapiens gamma-glutamyltransferase 7 (GGT7), mRNA [NM_178026]	-0.278903	0.824218	7.45703	-5.79201	0.000556972	0.0031057	-0.607117
2669	64975	MRPL41	mitochondrial ribosomal protein L41	Hs.44017	ENSG00000182154	A_32_P115130	ref|Homo sapiens mitochondrial ribosomal protein L41 (MRPL41), nuclear gene encoding mitochondrial protein, mRNA [NM_032477]	-0.278855	0.824245	12.5044	-12.9324	2.51e-06	8.09e-05	5.32195
31478	1244	ABCC2	ATP-binding cassette, sub-family C (CFTR/MRP), member 2	Hs.368243	ENSG00000023839	A_23_P158976	ref|Homo sapiens ATP-binding cassette, sub-family C (CFTR/MRP), member 2 (ABCC2), mRNA [NM_000392]	-0.278824	0.824262	9.58455	-8.24756	5.66e-05	0.000600517	1.91218
15809	199223	TTC21A	tetratricopeptide repeat domain 21A	Hs.443935	ENSG00000168026	A_23_P428248	ref|Homo sapiens tetratricopeptide repeat domain 21A (TTC21A), transcript variant 2, mRNA [NM_145755]	-0.278524	0.824434	7.52406	-9.48283	2.19e-05	0.000321567	2.95578
7239	2921	CXCL3	chemokine (C-X-C motif) ligand 3	Hs.89690	ENSG00000163734	A_24_P183150	ref|Homo sapiens chemokine (C-X-C motif) ligand 3 (CXCL3), mRNA [NM_002090]	-0.278423	0.824492	6.53888	-9.92705	1.6e-05	0.00026123	3.30189
36137	4338	MOCS2	molybdenum cofactor synthesis 2	Hs.163645	ENSG00000164172	A_23_P92967	ref|Homo sapiens molybdenum cofactor synthesis 2 (MOCS2), transcript variant 3, mRNA [NM_004531]	-0.277886	0.824799	6.28185	-11.0256	7.73e-06	0.000163266	4.10043
32846	5257	PHKB	phosphorylase kinase, beta	Hs.78060	ENSG00000102893	A_23_P206532	ref|Homo sapiens phosphorylase kinase, beta (PHKB), transcript variant 2, mRNA [NM_001031835]	-0.277549	0.824992	11.4414	-12.7573	2.77e-06	8.66e-05	5.21743
2748	5794	PTPRH	protein tyrosine phosphatase, receptor type, H	Hs.179770, Hs.657630	ENSG00000080031	A_23_P101642	ref|Homo sapiens protein tyrosine phosphatase, receptor type, H (PTPRH), mRNA [NM_002842]	-0.277408	0.825072	8.26337	-8.66046	4.07e-05	0.000480964	2.2752
33391	57501	KIAA1257	KIAA1257	Hs.518247	ENSG00000114656	A_32_P163739	ref|Homo sapiens KIAA1257 (KIAA1257), mRNA [NM_020741]	-0.277064	0.825269	5.34055	-9.13222	2.84e-05	0.000379413	2.67221
32359	23558	WBP2	WW domain binding protein 2	Hs.514489	ENSG00000132471	A_23_P3900	ref|Homo sapiens WW domain binding protein 2 (WBP2), mRNA [NM_012478]	-0.27683	0.825403	7.73245	-11.5553	5.56e-06	0.000132497	4.45912
16309	80235	PIGZ	phosphatidylinositol glycan anchor biosynthesis, class Z	Hs.518403	ENSG00000119227	A_23_P143935	ref|Homo sapiens phosphatidylinositol glycan anchor biosynthesis, class Z (PIGZ), mRNA [NM_025163]	-0.276542	0.825568	10.4073	-13.3737	1.98e-06	7.05e-05	5.57933
16615	3748	KCNC3	potassium voltage-gated channel, Shaw-related subfamily, member 3	Hs.467146	ENSG00000131398	A_23_P101516	ref|Homo sapiens potassium voltage-gated channel, Shaw-related subfamily, member 3 (KCNC3), mRNA [NM_004977]	-0.276157	0.825788	7.75564	-10.6193	1e-05	0.000192978	3.81407
16579	6905	TBCE	tubulin folding cofactor E	Hs.498143	ENSG00000116957	A_23_P52147	ref|Homo sapiens tubulin folding cofactor E (TBCE), transcript variant 1, mRNA [NM_001079515]	-0.275941	0.825912	10.774	-10.8644	8.56e-06	0.000174108	3.98805
14191	286016	TPI1P2	triosephosphate isomerase 1 pseudogene 2	Hs.369665	NA	A_24_P358328	ref|Homo sapiens hypothetical protein LOC286016 (LOC286016), non-coding RNA [NR_002187]	-0.275744	0.826024	12.064	-9.35348	2.41e-05	0.000341992	2.85226
42068	394	ARHGAP5	Rho GTPase activating protein 5	Hs.592313	ENSG00000100852	A_23_P48535	ref|Homo sapiens Rho GTPase activating protein 5 (ARHGAP5), transcript variant 1, mRNA [NM_001030055]	-0.275501	0.826163	9.39493	-12.3108	3.56e-06	0.000101324	4.94425
11988	78987	CRELD1	cysteine-rich with EGF-like domains 1	Hs.9383	ENSG00000163703	A_23_P155376	ref|Homo sapiens cysteine-rich with EGF-like domains 1 (CRELD1), transcript variant 2, mRNA [NM_015513]	-0.275163	0.826357	9.56304	-8.48841	4.66e-05	0.000524825	2.12576
38481	112483	SAT2	spermidine/spermine N1-acetyltransferase family member 2	Hs.10846	ENSG00000141504	A_23_P15402	ref|Homo sapiens spermidine/spermine N1-acetyltransferase family member 2 (SAT2), mRNA [NM_133491]	-0.275133	0.826374	12.1972	-10.574	1.03e-05	0.000196387	3.78152
35347	80318	GKAP1	G kinase anchoring protein 1	Hs.522255	ENSG00000165113	A_23_P94546	ref|Homo sapiens G kinase anchoring protein 1 (GKAP1), transcript variant 1, mRNA [NM_025211]	-0.274659	0.826646	7.75901	-9.59913	2.02e-05	0.000303748	3.04778
38777	57596	BEGAIN	brain-enriched guanylate kinase-associated homolog (rat)	Hs.211751	ENSG00000183092	A_23_P72127	ref|Homo sapiens brain-enriched guanylate kinase-associated homolog (rat) (BEGAIN), mRNA [NM_020836]	-0.274645	0.826654	11.4221	-11.5514	5.58e-06	0.000132665	4.45653
33131	6720	SREBF1	sterol regulatory element binding transcription factor 1	Hs.592123	ENSG00000072310	A_24_P390784	ref|Homo sapiens sterol regulatory element binding transcription factor 1 (SREBF1), transcript variant 1, mRNA [NM_001005291]	-0.274628	0.826664	10.7735	-7.38893	0.00011761	0.000999325	1.1062
19622	23461	ABCA5	ATP-binding cassette, sub-family A (ABC1), member 5	Hs.421474	ENSG00000154265	A_23_P78018	ref|Homo sapiens ATP-binding cassette, sub-family A (ABC1), member 5 (ABCA5), transcript variant 1, mRNA [NM_018672]	-0.274492	0.826741	9.34834	-10.3696	1.18e-05	0.00021428	3.63295
39589	201627	FAM116A	family with sequence similarity 116, member A	Hs.91085	ENSG00000174839	A_32_P118586	ref|Homo sapiens family with sequence similarity 116, member A (FAM116A), mRNA [NM_152678]	-0.27435	0.826823	7.89112	-11.5354	5.63e-06	0.000133158	4.44593
10838	83742	MARVELD1	MARVEL domain containing 1	NA	ENSG00000155254	A_23_P138725	ens|MARVEL domain-containing protein 1 [Source:UniProtKB/Swiss-Prot;Acc:Q9BSK0] [ENST00000285605]	-0.273684	0.827205	12.7234	-8.65198	4.1e-05	0.000483169	2.26789
21577	152503	SH3D19	SH3 domain containing 19	Hs.567725	ENSG00000109686	A_24_P366656	ref|Homo sapiens SH3 domain containing 19 (SH3D19), transcript variant 1, mRNA [NM_001009555]	-0.273594	0.827256	7.01033	-10.3749	1.18e-05	0.000213884	3.63684
21482	8226	HDHD1	haloacid dehalogenase-like hydrolase domain containing 1	Hs.185910	ENSG00000130021	A_23_P254842	ref|Homo sapiens haloacid dehalogenase-like hydrolase domain containing 1A (HDHD1A), transcript variant 2, mRNA [NM_012080]	-0.273568	0.827271	7.93465	-12.6551	2.93e-06	8.97e-05	5.15572
21958	120	ADD3	adducin 3 (gamma)	Hs.501012	ENSG00000148700	A_23_P202435	ref|Homo sapiens adducin 3 (gamma) (ADD3), transcript variant 1, mRNA [NM_016824]	-0.273475	0.827324	6.75962	-6.60395	0.000243921	0.0016991	0.301876
4855	165530	CLEC4F	C-type lectin domain family 4, member F	Hs.681239	ENSG00000152672	A_23_P380990	ref|Homo sapiens C-type lectin domain family 4, member F (CLEC4F), mRNA [NM_173535]	-0.273413	0.82736	5.72598	-10.691	9.58e-06	0.00018712	3.86532
32406	28966	SNX24	sorting nexin 24	Hs.483200	ENSG00000064652	A_23_P19095	ref|Homo sapiens sorting nexin 24 (SNX24), mRNA [NM_014035]	-0.273156	0.827507	7.33995	-10.7684	9.11e-06	0.000181236	3.92033
32984	641339	ZNF674	zinc finger protein 674	Hs.636105	ENSG00000251192	A_24_P92558	ref|Homo sapiens zinc finger family member 674 (ZNF674), mRNA [NM_001039891]	-0.273139	0.827517	6.37422	-7.9718	7.11e-05	0.000704218	1.66113
32213	57761	TRIB3	tribbles homolog 3 (Drosophila)	Hs.516826	ENSG00000101255	A_23_P210690	ref|Homo sapiens tribbles homolog 3 (Drosophila) (TRIB3), mRNA [NM_021158]	-0.273013	0.82759	11.2718	-7.6233	9.57e-05	0.00086419	1.33343
12436	83937	RASSF4	Ras association (RalGDS/AF-6) domain family member 4	Hs.522895	ENSG00000107551	A_24_P295590	ref|Homo sapiens Ras association (RalGDS/AF-6) domain family member 4 (RASSF4), mRNA [NM_032023]	-0.272415	0.827932	8.13834	-11.8561	4.64e-06	0.00011856	4.65582
42720	10397	NDRG1	N-myc downstream regulated 1	Hs.372914	ENSG00000104419	A_23_P20494	ref|Homo sapiens N-myc downstream regulated 1 (NDRG1), transcript variant 2, mRNA [NM_006096]	-0.272276	0.828012	9.21784	-10.9228	8.25e-06	0.00017036	4.02891
41193	8975	USP13	ubiquitin specific peptidase 13 (isopeptidase T-3)	Hs.175322	ENSG00000058056	A_23_P40989	ref|Homo sapiens ubiquitin specific peptidase 13 (isopeptidase T-3) (USP13), mRNA [NM_003940]	-0.271886	0.828236	8.3928	-11.5792	5.48e-06	0.000131677	4.47491
11698	84874	ZNF514	zinc finger protein 514	Hs.655109	ENSG00000144026	A_24_P88775	ref|Homo sapiens zinc finger protein 514 (ZNF514), mRNA [NM_032788]	-0.271726	0.828328	7.41195	-11.7111	5.06e-06	0.000125058	4.56163
13109	63875	MRPL17	mitochondrial ribosomal protein L17	Hs.523456, Hs.708782	ENSG00000158042	A_23_P87257	ref|Homo sapiens mitochondrial ribosomal protein L17 (MRPL17), nuclear gene encoding mitochondrial protein, mRNA [NM_022061]	-0.27142	0.828504	9.55707	-10.7307	9.33e-06	0.000183464	3.89364
27017	79729	SH3D21	SH3 domain containing 21	Hs.524496	ENSG00000214193	A_23_P307536	ref|Homo sapiens chromosome 1 open reading frame 113 (C1orf113), mRNA [NM_024676]	-0.271294	0.828576	7.67657	-8.04725	6.68e-05	0.000673357	1.73053
10009	140738	TMEM37	transmembrane protein 37	Hs.26216	ENSG00000171227	A_23_P67799	ref|Homo sapiens transmembrane protein 37 (TMEM37), mRNA [NM_183240]	-0.27087	0.82882	6.15692	-8.08192	6.49e-05	0.000659481	1.76223
3037	22821	RASA3	RAS p21 protein activator 3	Hs.593075	ENSG00000185989	A_23_P385673	gb|Homo sapiens mRNA for Ins(1,3,4,5)P4-binding protein. [X89399]	-0.270458	0.829056	9.46809	-7.98251	7.05e-05	0.000699804	1.67101
2870	29911	HOOK2	hook homolog 2 (Drosophila)	Hs.30792	ENSG00000095066	A_23_P153441	ref|Homo sapiens hook homolog 2 (Drosophila) (HOOK2), transcript variant 1, mRNA [NM_013312]	-0.270272	0.829163	8.02398	-11.4545	5.92e-06	0.000138166	4.39206
10426	26060	APPL1	adaptor protein, phosphotyrosine interaction, PH domain and leucine zipper containing 1	Hs.476415	ENSG00000157500	A_24_P302833	ref|Homo sapiens adaptor protein, phosphotyrosine interaction, PH domain and leucine zipper containing 1 (APPL1), mRNA [NM_012096]	-0.269976	0.829333	7.7204	-12.1564	3.89e-06	0.000106502	4.84748
24072	9028	RHBDL1	rhomboid, veinlet-like 1 (Drosophila)	Hs.137572	ENSG00000103269	A_23_P26468	ref|Homo sapiens rhomboid, veinlet-like 1 (Drosophila) (RHBDL1), mRNA [NM_003961]	-0.269657	0.829517	9.17645	-8.91767	3.34e-05	0.000420688	2.49392
30517	22934	RPIA	ribose 5-phosphate isomerase A	Hs.469264	ENSG00000153574	A_23_P131646	ref|Homo sapiens ribose 5-phosphate isomerase A (RPIA), mRNA [NM_144563]	-0.269266	0.829742	10.3743	-10.05	1.47e-05	0.000246221	3.39522
20841	92979	MARCH9	membrane-associated ring finger (C3HC4) 9	Hs.632709	ENSG00000139266	A_23_P47777	ref|Homo sapiens membrane-associated ring finger (C3HC4) 9 (MARCH9), mRNA [NM_138396]	-0.268673	0.830083	8.19826	-11.8931	4.54e-06	0.000116958	4.67973
34651	115399	LRRC56	leucine rich repeat containing 56	Hs.567655	ENSG00000161328	A_23_P368996	ref|Homo sapiens leucine rich repeat containing 56 (LRRC56), mRNA [NM_198075]	-0.2685	0.830182	6.81035	-12.2501	3.69e-06	0.00010316	4.90636
2851	100130418	CECR7	cat eye syndrome chromosome region, candidate 7 (non-protein coding)	Hs.725349	NA	A_24_P403501	gb|Homo sapiens cat eye syndrome chromosome region, candidate 7, mRNA (cDNA clone IMAGE:5289002). [BC043198]	-0.268499	0.830183	9.2369	-9.95439	1.57e-05	0.000257761	3.32274
25830	259290	TAS2R31	taste receptor, type 2, member 31	Hs.688197	ENSG00000256436	A_23_P416191	ref|Homo sapiens taste receptor, type 2, member 44 (TAS2R44), mRNA [NM_176885]	-0.268379	0.830252	7.99698	-12.8769	2.59e-06	8.25e-05	5.289
6838	9926	LPGAT1	lysophosphatidylglycerol acyltransferase 1	Hs.497674	ENSG00000123684	A_24_P336728	ref|Homo sapiens lysophosphatidylglycerol acyltransferase 1 (LPGAT1), mRNA [NM_014873]	-0.2671	0.830988	8.20664	-8.68361	4e-05	0.000474892	2.29511
19871	145482	PTGR2	prostaglandin reductase 2	Hs.632344	ENSG00000140043	A_23_P48705	ref|Homo sapiens prostaglandin reductase 2 (PTGR2), mRNA [NM_152444]	-0.266755	0.831187	5.41155	-6.53006	0.00026213	0.00178484	0.222535
33295	79641	ROGDI	rogdi homolog (Drosophila)	Hs.459795	ENSG00000067836	A_23_P100499	ref|Homo sapiens rogdi homolog (Drosophila) (ROGDI), mRNA [NM_024589]	-0.266631	0.831258	8.82617	-12.5774	3.06e-06	9.22e-05	5.10848
7681	1953	MEGF6	multiple EGF-like-domains 6	Hs.593645	ENSG00000162591	A_23_P62583	ref|Homo sapiens multiple EGF-like-domains 6 (MEGF6), mRNA [NM_001409]	-0.266433	0.831373	7.31931	-11.1954	6.94e-06	0.000152095	4.21718
15043	4501	MT1X	metallothionein 1X	Hs.374950	ENSG00000187193	A_23_P303242	ref|Homo sapiens metallothionein 1X (MT1X), mRNA [NM_005952]	-0.26643	0.831374	14.5542	-8.40022	5.01e-05	0.000550468	2.04816
9691	5297	PI4KA	phosphatidylinositol 4-kinase, catalytic, alpha	Hs.529438	ENSG00000241973	A_24_P142983	ref|Homo sapiens phosphatidylinositol 4-kinase, catalytic, alpha (PI4KA), transcript variant 1, mRNA [NM_002650]	-0.266338	0.831427	12.0589	-9.09575	2.92e-05	0.000386773	2.64216
32436	6550	SLC9A3	solute carrier family 9 (sodium/hydrogen exchanger), member 3	Hs.658120	ENSG00000066230	A_23_P30582	ref|Homo sapiens solute carrier family 9 (sodium/hydrogen exchanger), member 3 (SLC9A3), mRNA [NM_004174]	-0.266028	0.831606	6.0144	-6.5343	0.000261044	0.00178029	0.227108
22162	7851	MALL	mal, T-cell differentiation protein-like	Hs.185055	ENSG00000144063	A_23_P102551	ref|Homo sapiens mal, T-cell differentiation protein-like (MALL), mRNA [NM_005434]	-0.265739	0.831773	8.99367	-7.92583	7.39e-05	0.000722961	1.61858
5404	23559	WBP1	WW domain binding protein 1	Hs.516114	ENSG00000239779	A_23_P252808	ref|Homo sapiens WW domain binding protein 1 (WBP1), mRNA [NM_012477]	-0.26564	0.83183	10.0373	-12.5105	3.18e-06	9.45e-05	5.06759
6673	54816	ZNF280D	zinc finger protein 280D	Hs.511477	ENSG00000137871	A_23_P14708	ref|Homo sapiens zinc finger protein 280D (ZNF280D), transcript variant 1, mRNA [NM_017661]	-0.265565	0.831873	7.3007	-6.10641	0.000400838	0.00243785	-0.245243
28063	8675	STX16	syntaxin 16	Hs.307913	ENSG00000254995, ENSG00000124222	A_24_P936122	ref|Homo sapiens syntaxin 16 (STX16), transcript variant 1, mRNA [NM_001001433]	-0.265552	0.83188	10.9384	-10.3444	1.2e-05	0.000216391	3.61446
27507	10417	SPON2	spondin 2, extracellular matrix protein	Hs.302963, Hs.635350	ENSG00000159674	A_23_P121533	ref|Homo sapiens spondin 2, extracellular matrix protein (SPON2), transcript variant 1, mRNA [NM_012445]	-0.265432	0.831949	5.96134	-9.78668	1.77e-05	0.00027854	3.19406
4144	30819	KCNIP2	Kv channel interacting protein 2	Hs.97044	ENSG00000120049	A_24_P12998	ref|Homo sapiens Kv channel interacting protein 2 (KCNIP2), transcript variant 7, mRNA [NM_173197]	-0.265339	0.832003	6.09156	-8.06229	6.59e-05	0.000668418	1.7443
39844	8510	MMP23B	matrix metallopeptidase 23B	Hs.192316	ENSG00000189409	A_23_P74088	ref|Homo sapiens matrix metallopeptidase 23B (MMP23B), mRNA [NM_006983]	-0.264987	0.832206	6.09023	-6.09895	0.000403926	0.00245216	-0.253687
13697	85007	AGXT2L2	alanine-glyoxylate aminotransferase 2-like 2	Hs.248746	ENSG00000175309	A_23_P41888	ref|Homo sapiens alanine-glyoxylate aminotransferase 2-like 2 (AGXT2L2), mRNA [NM_153373]	-0.264548	0.832459	8.07793	-6.78957	0.000204098	0.00149543	0.49835
30062	728613	LOC728613	programmed cell death 6 pseudogene	Hs.720393	NA	A_24_P59632	ref|Homo sapiens programmed cell death 6 pseudogene (LOC728613), non-coding RNA [NR_003713]	-0.264119	0.832707	7.14329	-10.2599	1.27e-05	0.000223041	3.55217
9565	11282	MGAT4B	mannosyl (alpha-1,3-)-glycoprotein beta-1,4-N-acetylglucosaminyltransferase, isozyme B	Hs.567419	ENSG00000161013	A_24_P29260	ref|Homo sapiens mannosyl (alpha-1,3-)-glycoprotein beta-1,4-N-acetylglucosaminyltransferase, isozyme B (MGAT4B), transcript variant 2, mRNA [NM_054013]	-0.263983	0.832785	8.93171	-9.24455	2.61e-05	0.00035899	2.76409
10762	23621	BACE1	beta-site APP-cleaving enzyme 1	Hs.504003	ENSG00000186318	A_23_P52806	ref|Homo sapiens beta-site APP-cleaving enzyme 1 (BACE1), transcript variant a, mRNA [NM_012104]	-0.263832	0.832873	10.9131	-9.46557	2.22e-05	0.000323666	2.94203
24330	398	ARHGDIG	Rho GDP dissociation inhibitor (GDI) gamma	Hs.647388	ENSG00000242173	A_24_P215882	ref|Homo sapiens Rho GDP dissociation inhibitor (GDI) gamma (ARHGDIG), mRNA [NM_001176]	-0.263694	0.832952	7.46002	-6.73384	0.000215234	0.00155238	0.439786
18993	283345	RPL13P5	ribosomal protein L13 pseudogene 5	Hs.720698	NA	A_23_P48080	gb|Homo sapiens RRPL13L mRNA, partial sequence. [AY672103]	-0.263338	0.833158	8.01983	-7.39523	0.000116954	0.000994701	1.11238
40404	51205	ACP6	acid phosphatase 6, lysophosphatidic	Hs.562154	ENSG00000162836	A_23_P160240	ref|Homo sapiens acid phosphatase 6, lysophosphatidic (ACP6), mRNA [NM_016361]	-0.263329	0.833163	8.24254	-12.1335	3.95e-06	0.000107505	4.83302
1932	55175	KLHL11	kelch-like 11 (Drosophila)	Hs.592134	ENSG00000258250, ENSG00000178502	A_23_P55388	ref|Homo sapiens kelch-like 11 (Drosophila) (KLHL11), mRNA [NM_018143]	-0.262553	0.833612	7.86113	-5.82871	0.000535651	0.00301749	-0.564203
26359	4636	MYL5	myosin, light chain 5, regulatory	Hs.410970	ENSG00000215375	A_23_P258018	ref|Homo sapiens myosin, light chain 5, regulatory (MYL5), mRNA [NM_002477]	-0.261957	0.833956	8.86497	-10.299	1.24e-05	0.000219898	3.58105
35994	1643	DDB2	damage-specific DNA binding protein 2, 48kDa	Hs.700338	ENSG00000134574	A_23_P52610	ref|Homo sapiens damage-specific DNA binding protein 2, 48kDa (DDB2), mRNA [NM_000107]	-0.261557	0.834187	10.6656	-8.36649	5.14e-05	0.000561738	2.01829
27806	4582	MUC1	mucin 1, cell surface associated	Hs.89603	ENSG00000185499	A_23_P137856	ref|Homo sapiens mucin 1, cell surface associated (MUC1), transcript variant 1, mRNA [NM_002456]	-0.261532	0.834201	10.4377	-9.92645	1.6e-05	0.00026123	3.30144
35475	57473	ZNF512B	zinc finger protein 512B	Hs.551552	ENSG00000196700	A_23_P28730	ref|Homo sapiens zinc finger protein 512B (ZNF512B), mRNA [NM_020713]	-0.260854	0.834594	9.24924	-8.96724	3.22e-05	0.000411086	2.53544
6821	283131	NEAT1	nuclear paraspeckle assembly transcript 1 (non-protein coding)	Hs.523789, Hs.729910	NA	A_24_P290999	gb|Human clone 137308 mRNA, partial cds. [U60873]	-0.260438	0.834835	7.5656	-7.7108	8.87e-05	0.000820543	1.41684
32031	100507494	LOC100507494	hypothetical protein LOC100507494	Hs.683963	NA	A_24_P358760	gb|Homo sapiens mRNA for FLJ00403 protein. [AK090481]	-0.26039	0.834862	5.61904	-7.66932	9.2e-05	0.000840498	1.3774
40865	5207	PFKFB1	6-phosphofructo-2-kinase/fructose-2,6-biphosphatase 1	Hs.444304	ENSG00000158571	A_24_P203106	ref|Homo sapiens 6-phosphofructo-2-kinase/fructose-2,6-biphosphatase 1 (PFKFB1), mRNA [NM_002625]	-0.260289	0.834921	5.12429	-8.17555	6.01e-05	0.000624553	1.8473
21887	80705	TSGA10	testis specific, 10	Hs.120267	ENSG00000135951	A_23_P17103	ref|Homo sapiens testis specific, 10 (TSGA10), transcript variant 1, mRNA [NM_025244]	-0.25989	0.835152	5.51425	-8.91858	3.34e-05	0.00042052	2.49468
10285	124790	HEXIM2	hexamethylene bis-acetamide inducible 2	Hs.56382	ENSG00000168517	A_23_P377214	ref|Homo sapiens hexamthylene bis-acetamide inducible 2 (HEXIM2), mRNA [NM_144608]	-0.259358	0.83546	9.1616	-7.55284	0.000101773	0.000900787	1.26571
4816	100130717	CECR5-AS1	CECR5 antisense RNA 1 (non-protein coding)	Hs.660066	NA	A_32_P131143	ref|Homo sapiens cat eye syndrome chromosome region, candidate 4 (non-protein coding) (CECR4), transcript variant 2, non-coding RNA [NR_024482]	-0.259343	0.835468	8.30792	-7.09788	0.000153017	0.00121074	0.815961
23554	284297	SSC5D	scavenger receptor cysteine rich domain containing (5 domains)	Hs.554182	ENSG00000179954	A_24_P170717	gb|Homo sapiens cDNA FLJ35258 fis, clone PROST2004146. [AK092577]	-0.259099	0.835609	6.31489	-10.6175	1e-05	0.000193035	3.81278
2773	5863	RGL2	ral guanine nucleotide dissociation stimulator-like 2	Hs.509622	ENSG00000224841, ENSG00000237825, ENSG00000237441, ENSG00000206282, ENSG00000228736	A_23_P93383	ref|Homo sapiens ral guanine nucleotide dissociation stimulator-like 2 (RGL2), mRNA [NM_004761]	-0.259084	0.835618	9.57821	-6.17836	0.000372397	0.00231586	-0.164223
9856	4343	MOV10	Mov10, Moloney leukemia virus 10, homolog (mouse)	Hs.514941	ENSG00000155363	A_23_P161125	ref|Homo sapiens Mov10, Moloney leukemia virus 10, homolog (mouse) (MOV10), transcript variant 1, mRNA [NM_020963]	-0.258888	0.835732	8.03367	-11.7702	4.89e-06	0.0001223	4.60013
42419	585	BBS4	Bardet-Biedl syndrome 4	Hs.208681	ENSG00000140463	A_24_P176284	ref|Homo sapiens Bardet-Biedl syndrome 4 (BBS4), mRNA [NM_033028]	-0.258427	0.835999	7.19875	-10.3424	1.21e-05	0.000216454	3.613
7730	1241	LTB4R	leukotriene B4 receptor	Hs.567248	ENSG00000213903	A_23_P151791	ref|Homo sapiens leukotriene B4 receptor (LTB4R), mRNA [NM_181657]	-0.258294	0.836076	9.17751	-8.70172	3.94e-05	0.000470106	2.31066
39558	79760	GEMIN7	gem (nuclear organelle) associated protein 7	Hs.466919	ENSG00000142252	A_23_P89910	ref|Homo sapiens gem (nuclear organelle) associated protein 7 (GEMIN7), transcript variant 1, mRNA [NM_024707]	-0.257918	0.836294	8.20198	-7.61478	9.64e-05	0.00086916	1.32527
38273	201456	FBXO15	F-box protein 15	Hs.664011	ENSG00000141665	A_23_P342709	ref|Homo sapiens F-box protein 15 (FBXO15), transcript variant 1, mRNA [NM_152676]	-0.257851	0.836333	5.73291	-8.6993	3.95e-05	0.000470736	2.30858
12184	340371	NRBP2	nuclear receptor binding protein 2	Hs.521926	ENSG00000256201, ENSG00000185189	A_24_P242132	ref|Homo sapiens nuclear receptor binding protein 2 (NRBP2), mRNA [NM_178564]	-0.257404	0.836592	7.16955	-8.52309	4.54e-05	0.000516573	2.15609
40245	11180	WDR6	WD repeat domain 6	Hs.654815	ENSG00000178252	A_23_P95553	ref|Homo sapiens WD repeat domain 6 (WDR6), mRNA [NM_018031]	-0.257304	0.83665	11.4876	-9.09084	2.93e-05	0.000387437	2.63811
30159	89891	WDR34	WD repeat domain 34	Hs.495240	ENSG00000119333	A_23_P20823	ref|Homo sapiens WD repeat domain 34 (WDR34), mRNA [NM_052844]	-0.25714	0.836745	10.2997	-10.3713	1.18e-05	0.000214121	3.63422
27872	23274	CLEC16A	C-type lectin domain family 16, member A	Hs.35490	ENSG00000038532	A_32_P194246	ref|Homo sapiens C-type lectin domain family 16, member A (CLEC16A), mRNA [NM_015226]	-0.25704	0.836803	7.68693	-7.85194	7.87e-05	0.000753708	1.54977
42144	10841	FTCD	formiminotransferase cyclodeaminase	Hs.415846	ENSG00000160282	A_23_P91552	ref|Homo sapiens formiminotransferase cyclodeaminase (FTCD), transcript variant A, mRNA [NM_206965]	-0.256847	0.836915	6.85526	-8.4405	4.85e-05	0.000538456	2.08368
11190	11234	HPS5	Hermansky-Pudlak syndrome 5	Hs.437599	ENSG00000110756	A_23_P98631	ref|Homo sapiens Hermansky-Pudlak syndrome 5 (HPS5), transcript variant 1, mRNA [NM_181507]	-0.256814	0.836934	9.35304	-12.0907	4.05e-06	0.000109205	4.80598
3330	8863	PER3	period homolog 3 (Drosophila)	Hs.162200	ENSG00000049246	A_24_P291231	ref|Homo sapiens period homolog 3 (Drosophila) (PER3), mRNA [NM_016831]	-0.256291	0.837237	7.23074	-10.8757	8.5e-06	0.000173341	3.99596
1467	9540	TP53I3	tumor protein p53 inducible protein 3	Hs.50649	ENSG00000115129	A_23_P5392	ref|Homo sapiens tumor protein p53 inducible protein 3 (TP53I3), transcript variant 1, mRNA [NM_004881]	-0.25574	0.837557	8.52351	-12.2568	3.67e-06	0.000103071	4.91052
9465	93273	LEMD1	LEM domain containing 1	Hs.655520	ENSG00000186007	A_24_P696761	ref|Homo sapiens LEM domain containing 1 (LEMD1), mRNA [NM_001001552]	-0.255631	0.837621	7.60754	-11.3174	6.44e-06	0.000145637	4.29999
20005	30008	EFEMP2	EGF containing fibulin-like extracellular matrix protein 2	Hs.170622	ENSG00000172638	A_23_P24414	ref|Homo sapiens EGF-containing fibulin-like extracellular matrix protein 2 (EFEMP2), mRNA [NM_016938]	-0.255307	0.837809	7.04664	-8.12204	6.28e-05	0.000644009	1.79879
30300	103910	MYL12B	myosin, light chain 12B, regulatory	Hs.190086, Hs.464472	ENSG00000118680	A_24_P75230	ref|Homo sapiens myosin regulatory light chain MRLC2 (MRLC2), mRNA [NM_033546]	-0.254785	0.838112	11.4089	-8.3954	5.02e-05	0.000552266	2.04389
22786	79094	CHAC1	ChaC, cation transport regulator homolog 1 (E. coli)	Hs.155569	ENSG00000128965	A_23_P14863	ref|Homo sapiens ChaC, cation transport regulator homolog 1 (E. coli) (CHAC1), transcript variant 1, mRNA [NM_024111]	-0.254604	0.838217	7.13422	-9.55906	2.08e-05	0.000309906	3.01619
1610	1632	ECI1	enoyl-CoA delta isomerase 1	Hs.403436	ENSG00000167969	A_23_P163647	ref|Homo sapiens dodecenoyl-Coenzyme A delta isomerase (3,2 trans-enoyl-Coenzyme A isomerase) (DCI), nuclear gene encoding mitochondrial protein, mRNA [NM_001919]	-0.254137	0.838488	11.4809	-8.70527	3.93e-05	0.000469068	2.3137
23164	64773	FAM113A	family with sequence similarity 113, member A	Hs.29341	ENSG00000132635	A_23_P17471	ref|Homo sapiens family with sequence similarity 113, member A (FAM113A), mRNA [NM_022760]	-0.254089	0.838517	7.54941	-8.50144	4.62e-05	0.000520951	2.13716
40495	284001	CCDC57	coiled-coil domain containing 57	Hs.631724	ENSG00000176155	A_24_P896381	ref|Homo sapiens coiled-coil domain containing 57 (CCDC57), mRNA [NM_198082]	-0.253989	0.838574	7.69442	-10.5331	1.06e-05	0.000199368	3.75198
31586	55063	ZCWPW1	zinc finger, CW type with PWWP domain 1	Hs.105191	ENSG00000078487	A_23_P70897	ref|Homo sapiens zinc finger, CW type with PWWP domain 1 (ZCWPW1), mRNA [NM_017984]	-0.253694	0.838746	8.18005	-10.1759	1.35e-05	0.000232299	3.48966
27132	81576	CCDC130	coiled-coil domain containing 130	Hs.24998	ENSG00000104957	A_23_P101461	ref|Homo sapiens coiled-coil domain containing 130 (CCDC130), mRNA [NM_030818]	-0.253441	0.838893	11.8306	-11.7989	4.8e-06	0.000121087	4.61884
42670	89894	TMEM116	transmembrane protein 116	Hs.506815	ENSG00000198270	A_23_P105619	ref|Homo sapiens transmembrane protein 116 (TMEM116), mRNA [NM_138341]	-0.253169	0.839051	7.69819	-10.6128	1.01e-05	0.000193462	3.80939
136	3291	HSD11B2	hydroxysteroid (11-beta) dehydrogenase 2	Hs.1376	ENSG00000176387	A_23_P14986	ref|Homo sapiens hydroxysteroid (11-beta) dehydrogenase 2 (HSD11B2), mRNA [NM_000196]	-0.253088	0.839099	6.916	-8.47778	4.7e-05	0.00052837	2.11644
22140	5291	PIK3CB	phosphoinositide-3-kinase, catalytic, beta polypeptide	Hs.239818	ENSG00000051382	A_23_P346969	ref|Homo sapiens phosphoinositide-3-kinase, catalytic, beta polypeptide (PIK3CB), mRNA [NM_006219]	-0.253082	0.839102	9.22653	-10.3603	1.19e-05	0.000215256	3.62614
17046	84820	POLR2J4	polymerase (RNA) II (DNA directed) polypeptide J4, pseudogene	Hs.657028	NA	A_32_P171921	gb|BI333945 602997212F1 NIH_MGC_12 Homo sapiens cDNA clone IMAGE:5139483 5', mRNA sequence [BI333945]	-0.252466	0.83946	8.98948	-9.811	1.74e-05	0.000275619	3.21285
42695	2334	AFF2	AF4/FMR2 family, member 2	Hs.496911	ENSG00000155966	A_23_P217468	ref|Homo sapiens AF4/FMR2 family, member 2 (AFF2), mRNA [NM_002025]	-0.252456	0.839466	4.84293	-5.16329	0.0011168	0.0052438	-1.37061
20690	221154	EFHA1	EF-hand domain family, member A1	Hs.412103	ENSG00000165487	A_23_P76598	ref|Homo sapiens EF-hand domain family, member A1 (EFHA1), mRNA [NM_152726]	-0.252399	0.839499	9.931	-11.7609	4.91e-06	0.0001223	4.59414
38815	4832	NME3	non-metastatic cells 3, protein expressed in	Hs.514065	ENSG00000103024	A_23_P152115	ref|Homo sapiens non-metastatic cells 3, protein expressed in (NME3), mRNA [NM_002513]	-0.252043	0.839707	11.7098	-8.57287	4.36e-05	0.000503051	2.19944
40805	163688	CALML6	calmodulin-like 6	Hs.85902	ENSG00000169885	A_23_P62588	ref|Homo sapiens calmodulin-like 6 (CALML6), mRNA [NM_138705]	-0.251762	0.83987	6.21017	-4.58743	0.00221527	0.00883342	-2.11877
10857	9205	ZMYM5	zinc finger, MYM-type 5	Hs.530988	ENSG00000132950	A_24_P321634	ref|Homo sapiens zinc finger, MYM-type 5 (ZMYM5), transcript variant 1, mRNA [NM_001039650]	-0.251749	0.839878	8.61474	-7.77677	8.39e-05	0.000788763	1.47921
32429	338657	CCDC84	coiled-coil domain containing 84	Hs.534613	ENSG00000186166	A_24_P636332	ref|Homo sapiens coiled-coil domain containing 84 (CCDC84), mRNA [NM_198489]	-0.251679	0.839919	9.95591	-11.7612	4.91e-06	0.0001223	4.59432
35467	51182	HSPA14	heat shock 70kDa protein 14	Hs.534169	ENSG00000187522	A_23_P63829	ref|Homo sapiens heat shock 70kDa protein 14 (HSPA14), transcript variant 1, mRNA [NM_016299]	-0.251644	0.839939	9.98571	-11.9296	4.45e-06	0.00011528	4.70316
7932	2235	FECH	ferrochelatase	Hs.365365	ENSG00000066926	A_23_P89798	ref|Homo sapiens ferrochelatase (protoporphyria) (FECH), nuclear gene encoding mitochondrial protein, transcript variant 1, mRNA [NM_001012515]	-0.251265	0.840159	8.40234	-11.4693	5.86e-06	0.000137288	4.40196
13469	114758	CSPG4P1Y	chondroitin sulfate proteoglycan 4 pseudogene 1, Y-linked	Hs.514045	NA	A_23_P73870	ref|Homo sapiens chondroitin sulfate proteoglycan 4-like, Y-linked pseudogene 1 (CSPG4LYP1), non-coding RNA [NR_001554]	-0.251137	0.840234	6.31385	-11.3818	6.19e-06	0.000142175	4.34335
11737	84179	MFSD7	major facilitator superfamily domain containing 7	Hs.567612	ENSG00000169026	A_23_P72157	ref|Homo sapiens major facilitator superfamily domain containing 7 (MFSD7), mRNA [NM_032219]	-0.251069	0.840274	6.56442	-10.7478	9.23e-06	0.00018257	3.90577
25873	54765	TRIM44	tripartite motif containing 44	Hs.192103	ENSG00000166326	A_24_P192821	ref|Homo sapiens tripartite motif-containing 44 (TRIM44), mRNA [NM_017583]	-0.250736	0.840467	6.46126	-6.62079	0.000239972	0.0016775	0.319868
25439	2217	FCGRT	Fc fragment of IgG, receptor, transporter, alpha	Hs.111903	ENSG00000104870	A_23_P55936	ref|Homo sapiens Fc fragment of IgG, receptor, transporter, alpha (FCGRT), transcript variant 1, mRNA [NM_004107]	-0.250686	0.840497	10.4994	-9.01788	3.09e-05	0.000400336	2.57766
35076	84061	MAGT1	magnesium transporter 1	Hs.323562	ENSG00000102158	A_23_P148273	ref|Homo sapiens magnesium transporter 1 (MAGT1), mRNA [NM_032121]	-0.250388	0.84067	8.21396	-10.131	1.39e-05	0.000237319	3.45614
39073	55324	ABCF3	ATP-binding cassette, sub-family F (GCN20), member 3	Hs.361323	ENSG00000161204	A_24_P251688	ref|Homo sapiens ATP-binding cassette, sub-family F (GCN20), member 3 (ABCF3), mRNA [NM_018358]	-0.250258	0.840746	8.31367	-5.69171	0.000620199	0.00337326	-0.725297
16729	373863	DND1	dead end homolog 1 (zebrafish)	Hs.591262	ENSG00000256453	A_32_P42054	ref|Homo sapiens dead end homolog 1 (zebrafish) (DND1), mRNA [NM_194249]	-0.249835	0.840993	8.70915	-8.33664	5.27e-05	0.000570723	1.99177
29622	55259	CASC1	cancer susceptibility candidate 1	Hs.407771	ENSG00000118307	A_23_P95231	ref|Homo sapiens cancer susceptibility candidate 1 (CASC1), transcript variant 1, mRNA [NM_018272]	-0.249724	0.841057	5.22776	-9.16056	2.78e-05	0.000374774	2.69548
22227	10312	TCIRG1	T-cell, immune regulator 1, ATPase, H+ transporting, lysosomal V0 subunit A3	Hs.495985	ENSG00000110719	A_23_P75369	ref|Homo sapiens T-cell, immune regulator 1, ATPase, H+ transporting, lysosomal V0 subunit A3 (TCIRG1), transcript variant 1, mRNA [NM_006019]	-0.249655	0.841098	11.7336	-9.25097	2.6e-05	0.000357898	2.76931
13504	57232	ZNF630	zinc finger protein 630	Hs.650883	ENSG00000221994	A_23_P390384	ref|Homo sapiens zinc finger protein 630 (ZNF630), mRNA [NM_001037735]	-0.24957	0.841147	9.05465	-8.21027	5.84e-05	0.000613073	1.87864
36181	8648	NCOA1	nuclear receptor coactivator 1	Hs.596314	ENSG00000084676	A_23_P39602	ref|Homo sapiens nuclear receptor coactivator 1 (NCOA1), transcript variant 3, mRNA [NM_147233]	-0.249345	0.841278	9.11039	-11.5066	5.73e-06	0.000135075	4.42678
10784	468	ATF4	activating transcription factor 4 (tax-responsive enhancer element B67)	Hs.496487	ENSG00000128272	A_23_P120941	ref|Homo sapiens activating transcription factor 4 (tax-responsive enhancer element B67) (ATF4), transcript variant 1, mRNA [NM_001675]	-0.249089	0.841428	10.2636	-10.6986	9.53e-06	0.000186345	3.87076
39776	400073	C12orf76	chromosome 12 open reading frame 76	Hs.44817	ENSG00000174456	A_23_P410312	ref|Homo sapiens FLJ40142 protein (FLJ40142), mRNA [NM_207435]	-0.248865	0.841558	8.78448	-11.5601	5.55e-06	0.000132228	4.46232
2644	150291	MORC2-AS1	MORC2 antisense RNA 1 (non-protein coding)	Hs.592202	NA	A_32_P172114	gb|602371655F1 NIH_MGC_93 Homo sapiens cDNA clone IMAGE:4479924 5', mRNA sequence [BG260069]	-0.24843	0.841812	6.82917	-10.3949	1.16e-05	0.000212005	3.65153
4061	3251	HPRT1	hypoxanthine phosphoribosyltransferase 1	Hs.412707	ENSG00000165704	A_23_P11372	ref|Homo sapiens hypoxanthine phosphoribosyltransferase 1 (HPRT1), mRNA [NM_000194]	-0.248399	0.84183	9.52302	-7.8729	7.73e-05	0.000744891	1.56934
35847	22820	COPG	coatomer protein complex, subunit gamma	Hs.518250	ENSG00000181789	A_23_P44617	ref|Homo sapiens coatomer protein complex, subunit gamma (COPG), mRNA [NM_016128]	-0.24776	0.842203	8.36531	-11.6772	5.17e-06	0.00012701	4.53942
34162	100507311	LOC100507311	hypothetical LOC100507311	Hs.729266	NA	A_24_P870509	gb|Homo sapiens full length insert cDNA clone ZD42A11. [AF086261]	-0.247701	0.842237	5.92508	-10.3033	1.24e-05	0.000219448	3.5842
23108	10198	MPHOSPH9	M-phase phosphoprotein 9	Hs.577404	ENSG00000051825	A_24_P398500	ref|Homo sapiens M-phase phosphoprotein 9 (MPHOSPH9), mRNA [NM_022782]	-0.24727	0.842489	8.65751	-8.34713	5.22e-05	0.000566997	2.0011
18613	163175	LGI4	leucine-rich repeat LGI family, member 4	Hs.65256	ENSG00000153902	A_24_P310256	ref|Homo sapiens leucine-rich repeat LGI family, member 4 (LGI4), mRNA [NM_139284]	-0.247212	0.842523	5.58835	-8.54442	4.46e-05	0.000510142	2.17469
27813	10009	ZBTB33	zinc finger and BTB domain containing 33	Hs.143604	ENSG00000177485	A_23_P96483	ref|Homo sapiens zinc finger and BTB domain containing 33 (ZBTB33), mRNA [NM_006777]	-0.24693	0.842687	5.76413	-9.32801	2.46e-05	0.000346286	2.83173
16555	25875	LETMD1	LETM1 domain containing 1	Hs.655272	ENSG00000050426	A_23_P117037	ref|Homo sapiens LETM1 domain containing 1 (LETMD1), transcript variant 1, mRNA [NM_015416]	-0.246765	0.842784	9.60911	-9.38089	2.36e-05	0.00033719	2.8743
6332	9906	SLC35E2	solute carrier family 35, member E2	Hs.655255, Hs.707620	ENSG00000215790	A_24_P113815	ref|Homo sapiens solute carrier family 35, member E2 (SLC35E2), mRNA [NM_182838]	-0.24651	0.842933	8.83901	-9.02745	3.07e-05	0.000398524	2.58561
9304	116444	GRIN3B	glutamate receptor, ionotropic, N-methyl-D-aspartate 3B	Hs.660378	ENSG00000116032	A_23_P108180	ref|Homo sapiens glutamate receptor, ionotropic, N-methyl-D-aspartate 3B (GRIN3B), mRNA [NM_138690]	-0.245157	0.843724	5.78257	-8.15045	6.13e-05	0.000633614	1.82458
32894	8569	MKNK1	MAP kinase interacting serine/threonine kinase 1	Hs.371594	ENSG00000079277	A_23_P200126	ref|Homo sapiens MAP kinase interacting serine/threonine kinase 1 (MKNK1), transcript variant 1, mRNA [NM_003684]	-0.244748	0.843963	8.5669	-8.99628	3.15e-05	0.000404878	2.55967
42501	5287	PIK3C2B	phosphoinositide-3-kinase, class 2, beta polypeptide	Hs.497487	ENSG00000133056	A_23_P200710	ref|Homo sapiens phosphoinositide-3-kinase, class 2, beta polypeptide (PIK3C2B), mRNA [NM_002646]	-0.244467	0.844127	8.06986	-10.7333	9.32e-06	0.000183297	3.89545
16511	10693	CCT6B	chaperonin containing TCP1, subunit 6B (zeta 2)	Hs.73072	ENSG00000132141	A_23_P4082	ref|Homo sapiens chaperonin containing TCP1, subunit 6B (zeta 2) (CCT6B), mRNA [NM_006584]	-0.244389	0.844173	7.57576	-9.79809	1.75e-05	0.000277321	3.20288
18743	23243	ANKRD28	ankyrin repeat domain 28	Hs.335239	ENSG00000206560	A_24_P217365	ref|Homo sapiens ankyrin repeat domain 28 (ANKRD28), mRNA [NM_015199]	-0.244387	0.844175	8.91708	-11.6103	5.38e-06	0.000130345	4.49545
25283	2852	GPER	G protein-coupled estrogen receptor 1	Hs.20961	ENSG00000164850	A_23_P8640	ref|Homo sapiens G protein-coupled estrogen receptor 1 (GPER), transcript variant 3, mRNA [NM_001039966]	-0.244368	0.844186	10.1499	-10.4798	1.1e-05	0.000203958	3.71342
6040	203197	C9orf91	chromosome 9 open reading frame 91	Hs.522357	ENSG00000157693	A_24_P4373	ref|Homo sapiens chromosome 9 open reading frame 91 (C9orf91), mRNA [NM_153045]	-0.244058	0.844367	7.61337	-10.0392	1.48e-05	0.000247446	3.38708
38065	283507	SUGT1P3	suppressor of G2 allele of SKP1 (S. cerevisiae) pseudogene 3	Hs.442781	NA	A_24_P135255	gb|Homo sapiens SGT1, suppressor of G2 allele of SKP1 like 1 (S. cerevisiae), mRNA (cDNA clone IMAGE:4295904). [BC020814]	-0.243925	0.844445	6.5669	-9.21249	2.68e-05	0.000365115	2.73797
13476	55257	C20orf20	chromosome 20 open reading frame 20	Hs.590870	ENSG00000101189	A_23_P17307	ref|Homo sapiens chromosome 20 open reading frame 20 (C20orf20), mRNA [NM_018270]	-0.243904	0.844457	9.77721	-6.48883	0.000272946	0.00183954	0.177981
37044	286006	C7orf53	chromosome 7 open reading frame 53	Hs.396189	ENSG00000181016	A_24_P380679	ref|Homo sapiens chromosome 7 open reading frame 53 (C7orf53), transcript variant 1, mRNA [NM_182597]	-0.243835	0.844497	7.33403	-8.04785	6.67e-05	0.000673353	1.73107
30837	57593	EBF4	early B-cell factor 4	Hs.471955	ENSG00000088881	A_23_P109122	ref|Homo sapiens early B-cell factor 4 (EBF4), mRNA [NM_001110514]	-0.243456	0.844719	8.2602	-9.77292	1.78e-05	0.000280234	3.18341
35087	57475	PLEKHH1	pleckstrin homology domain containing, family H (with MyTH4 domain) member 1	Hs.594236	ENSG00000054690	A_24_P134850	ref|Homo sapiens pleckstrin homology domain containing, family H (with MyTH4 domain) member 1 (PLEKHH1), mRNA [NM_020715]	-0.243389	0.844759	6.94209	-10.8686	8.54e-06	0.000173859	3.99094
25311	90024	FLJ20021	hypothetical LOC90024	Hs.534513	NA	A_32_P131929	gb|Homo sapiens cDNA FLJ20021 fis, clone ADSE01233. [AK000028]	-0.243386	0.844761	8.56596	-8.67951	4.01e-05	0.000476094	2.29159
10404	26298	EHF	ets homologous factor	Hs.653859	ENSG00000135373	A_24_P64442	gb|Homo sapiens cDNA: FLJ22864 fis, clone KAT02164. [AK026517]	-0.243001	0.844986	9.14951	-8.09104	6.44e-05	0.000656211	1.77056
17584	10319	LAMC3	laminin, gamma 3	Hs.201805	ENSG00000050555	A_23_P82979	ref|Homo sapiens laminin, gamma 3 (LAMC3), mRNA [NM_006059]	-0.242747	0.845134	6.57	-11.3225	6.42e-06	0.000145385	4.30348
31413	57657	HCN3	hyperpolarization activated cyclic nucleotide-gated potassium channel 3	Hs.706960	ENSG00000255816, ENSG00000143630	A_23_P34827	ref|Homo sapiens hyperpolarization activated cyclic nucleotide-gated potassium channel 3 (HCN3), mRNA [NM_020897]	-0.242516	0.84527	7.63488	-9.34595	2.42e-05	0.000343013	2.8462
4452	27131	SNX5	sorting nexin 5	Hs.316890	ENSG00000089006	A_23_P131954	ref|Homo sapiens sorting nexin 5 (SNX5), transcript variant 2, mRNA [NM_014426]	-0.242488	0.845286	11.6556	-11.6615	5.22e-06	0.000127837	4.52913
43174	374650	GOLGA6L5	golgin A6 family-like 5 (pseudogene)	Hs.454625, Hs.498345, Hs.534573, Hs.630181, Hs.726926	NA	A_32_P60343	ref|Homo sapiens hypothetical protein LOC440295 (LOC440295), mRNA [NM_198181]	-0.24187	0.845648	8.73381	-6.91639	0.000181078	0.00136789	0.630295
30409	9311	ACCN3	amiloride-sensitive cation channel 3	Hs.647113	ENSG00000213199	A_23_P93658	ref|Homo sapiens amiloride-sensitive cation channel 3 (ACCN3), transcript variant 3, mRNA [NM_020322]	-0.241747	0.84572	6.05911	-5.72404	0.000598986	0.00328175	-0.687053
33547	7572	ZNF24	zinc finger protein 24	Hs.514802	ENSG00000172466	A_24_P339450	ref|Homo sapiens zinc finger protein 24 (ZNF24), mRNA [NM_006965]	-0.241467	0.845885	7.44538	-10.4823	1.1e-05	0.000203795	3.71522
28987	6932	TCF7	transcription factor 7 (T-cell specific, HMG-box)	Hs.573153	ENSG00000081059	A_23_P7582	ref|Homo sapiens transcription factor 7 (T-cell specific, HMG-box) (TCF7), transcript variant 1, mRNA [NM_003202]	-0.241327	0.845967	8.00309	-9.13868	2.83e-05	0.000378529	2.67752
33483	131616	TMEM42	transmembrane protein 42	Hs.646856	ENSG00000169964	A_23_P29836	ref|Homo sapiens transmembrane protein 42 (TMEM42), mRNA [NM_144638]	-0.240723	0.846321	11.2574	-11.5916	5.44e-06	0.000131298	4.48311
32462	1312	COMT	catechol-O-methyltransferase	Hs.370408	ENSG00000093010	A_23_P251680	ref|Homo sapiens catechol-O-methyltransferase (COMT), transcript variant 1, mRNA [NM_000754]	-0.240707	0.84633	11.5915	-10.9161	8.28e-06	0.000170817	4.02426
19664	80863	PRRT1	proline-rich transmembrane protein 1	Hs.549204, Hs.699821	ENSG00000204314, ENSG00000238056, ENSG00000229071, ENSG00000225141, ENSG00000206331, ENSG00000235956, ENSG00000229488, ENSG00000227122	A_32_P192474	ref|Homo sapiens proline-rich transmembrane protein 1 (PRRT1), mRNA [NM_030651]	-0.240626	0.846378	6.87086	-10.3501	1.2e-05	0.000215925	3.61864
7607	4192	MDK	midkine (neurite growth-promoting factor 2)	Hs.82045	ENSG00000110492	A_23_P116235	ref|Homo sapiens midkine (neurite growth-promoting factor 2) (MDK), transcript variant 1, mRNA [NM_001012334]	-0.2406	0.846393	7.76241	-10.6001	1.02e-05	0.000194554	3.80032
22938	197342	EME2	essential meiotic endonuclease 1 homolog 2 (S. pombe)	Hs.7247	ENSG00000197774	A_23_P366125	ens|essential meiotic endonuclease 1 homolog 2 [Source:RefSeq peptide;Acc:NP_001010865] [ENST00000307394]	-0.240511	0.846445	6.186	-7.31686	0.000125434	0.00104954	1.03518
34270	1460	CSNK2B	casein kinase 2, beta polypeptide	Hs.73527	ENSG00000204435, ENSG00000206406, ENSG00000228875, ENSG00000224398, ENSG00000232960, ENSG00000230700, ENSG00000224774	A_24_P804263	ref|Homo sapiens casein kinase 2, beta polypeptide (CSNK2B), mRNA [NM_001320]	-0.240383	0.84652	9.57068	-11.1688	7.06e-06	0.000153794	4.19899
36267	27151	CPAMD8	C3 and PZP-like, alpha-2-macroglobulin domain containing 8	Hs.631644	ENSG00000160111	A_23_P67198	ref|Homo sapiens C3 and PZP-like, alpha-2-macroglobulin domain containing 8 (CPAMD8), mRNA [NM_015692]	-0.240352	0.846539	6.47296	-11.5436	5.6e-06	0.000133075	4.45138
3963	728411	GUSBP1	glucuronidase, beta pseudogene 1	Hs.88181	NA	A_32_P86	gb|Homo sapiens, clone IMAGE:4590099, mRNA. [BC048193]	-0.240312	0.846562	8.35512	-6.08262	0.000410768	0.00248145	-0.272175
27318	169611	OLFML2A	olfactomedin-like 2A	Hs.357004	ENSG00000185585	A_24_P100856	ref|Homo sapiens olfactomedin-like 2A (OLFML2A), mRNA [NM_182487]	-0.240125	0.846672	6.01469	-8.44372	4.83e-05	0.000537254	2.08651
39433	114926	C8orf40	chromosome 8 open reading frame 40	Hs.655320	ENSG00000176209	A_24_P261005	ref|Homo sapiens chromosome 8 open reading frame 40 (C8orf40), transcript variant 3, mRNA [NM_138436]	-0.240081	0.846698	7.86787	-10.8105	8.86e-06	0.000178411	3.95012
42272	84191	FAM96A	family with sequence similarity 96, member A	Hs.439548	ENSG00000166797	A_23_P37636	ref|Homo sapiens family with sequence similarity 96, member A (FAM96A), transcript variant 1, mRNA [NM_032231]	-0.239958	0.84677	10.0359	-10.3152	1.23e-05	0.00021871	3.59301
39460	64780	MICAL1	microtubule associated monoxygenase, calponin and LIM domain containing 1	Hs.33476	ENSG00000135596	A_24_P283341	ref|Homo sapiens microtubule associated monoxygenase, calponin and LIM domain containing 1 (MICAL1), mRNA [NM_022765]	-0.239847	0.846835	8.58367	-7.52318	0.000104452	0.000916035	1.23705
14978	55072	RNF31	ring finger protein 31	Hs.375217, Hs.434081	ENSG00000092098	A_23_P99632	ref|Homo sapiens ring finger protein 31 (RNF31), mRNA [NM_017999]	-0.239579	0.846993	8.487	-10.479	1.1e-05	0.000203989	3.71279
7873	147699	PPM1N	protein phosphatase, Mg2+/Mn2+ dependent, 1N (putative)	Hs.532872	ENSG00000213889	A_23_P141893	ref|Homo sapiens hypothetical protein FLJ40125 (FLJ40125), mRNA [NM_001080401]	-0.239493	0.847043	7.9089	-9.44519	2.26e-05	0.000327365	2.92578
7570	57830	KRTAP5-8	keratin associated protein 5-8	Hs.445245	ENSG00000241233	A_23_P47086	ref|Homo sapiens keratin associated protein 5-8 (KRTAP5-8), mRNA [NM_021046]	-0.239391	0.847103	6.83088	-9.53362	2.12e-05	0.000313806	2.99608
20991	9530	BAG4	BCL2-associated athanogene 4	Hs.194726	ENSG00000156735	A_23_P146217	ref|Homo sapiens BCL2-associated athanogene 4 (BAG4), mRNA [NM_004874]	-0.239267	0.847176	6.7817	-8.90431	3.37e-05	0.000423892	2.48269
9809	90799	CEP95	centrosomal protein 95kDa	Hs.569713	ENSG00000256785, ENSG00000257066	A_23_P307400	ref|Homo sapiens coiled-coil domain containing 45 (CCDC45), mRNA [NM_138363]	-0.238956	0.847358	11.5567	-9.54249	2.1e-05	0.000312664	3.0031
14044	55738	ARFGAP1	ADP-ribosylation factor GTPase activating protein 1	Hs.25584	ENSG00000101199	A_24_P271296	ref|Homo sapiens ADP-ribosylation factor GTPase activating protein 1 (ARFGAP1), transcript variant 2, mRNA [NM_175609]	-0.238718	0.847498	6.64096	-8.22612	5.76e-05	0.000607838	1.89291
41726	29947	DNMT3L	DNA (cytosine-5-)-methyltransferase 3-like	Hs.592165	ENSG00000142182	A_23_P17673	ref|Homo sapiens DNA (cytosine-5-)-methyltransferase 3-like (DNMT3L), transcript variant 1, mRNA [NM_013369]	-0.238699	0.847509	4.89155	-8.95159	3.25e-05	0.000413201	2.52235
1506	1675	CFD	complement factor D (adipsin)	Hs.155597	ENSG00000197766	A_23_P119562	ref|Homo sapiens complement factor D (adipsin) (CFD), mRNA [NM_001928]	-0.23858	0.847579	10.753	-9.95122	1.57e-05	0.00025819	3.32032
34376	100129637	LOC100129637	hypothetical LOC100129637	Hs.123450	NA	A_24_P110365	ref|Homo sapiens hypothetical LOC100129637 (LOC100129637), non-coding RNA [NR_024488]	-0.238369	0.847703	5.89143	-9.34428	2.43e-05	0.00034307	2.84485
35991	71	ACTG1	actin, gamma 1	Hs.514581	ENSG00000184009	A_32_P175198	ref|Homo sapiens actin, gamma 1 (ACTG1), mRNA [NM_001614]	-0.238301	0.847743	15.3055	-4.10651	0.00407332	0.0142338	-2.77996
9843	91392	ZNF502	zinc finger protein 502	Hs.224843	ENSG00000196653	A_23_P29384	ref|Homo sapiens zinc finger protein 502 (ZNF502), transcript variant 1, mRNA [NM_033210]	-0.238134	0.847841	7.07538	-9.61552	1.99e-05	0.000301777	3.06067
28390	55100	WDR70	WD repeat domain 70	Hs.213690	ENSG00000082068	A_23_P30474	ref|Homo sapiens WD repeat domain 70 (WDR70), mRNA [NM_018034]	-0.238045	0.847894	9.91987	-9.59038	2.03e-05	0.000304601	3.04089
10640	26039	SS18L1	synovial sarcoma translocation gene on chromosome 18-like 1	Hs.154429	ENSG00000184402	A_32_P139654	ref|Homo sapiens synovial sarcoma translocation gene on chromosome 18-like 1 (SS18L1), mRNA [NM_198935]	-0.237986	0.847928	9.77256	-9.29197	2.52e-05	0.000351599	2.80259
29079	10455	ECI2	enoyl-CoA delta isomerase 2	Hs.15250	ENSG00000198721	A_23_P156852	ref|Homo sapiens peroxisomal D3,D2-enoyl-CoA isomerase (PECI), transcript variant 2, mRNA [NM_206836]	-0.23792	0.847967	11.5977	-11.3301	6.39e-06	0.000145085	4.30859
19325	26232	FBXO2	F-box protein 2	Hs.132753, Hs.556006	ENSG00000116661	A_23_P45999	ref|Homo sapiens F-box protein 2 (FBXO2), mRNA [NM_012168]	-0.237643	0.84813	11.3806	-11.2187	6.84e-06	0.00015089	4.23306
9047	171391	NS3BP	NS3BP	Hs.711081	NA	A_23_P412427	gb|Homo sapiens NS3 binding protein (NS3BP) mRNA, complete cds. [AF435951]	-0.237603	0.848153	6.03402	-8.70831	3.92e-05	0.000468086	2.31631
38533	55344	PLCXD1	phosphatidylinositol-specific phospholipase C, X domain containing 1	Hs.522568	ENSG00000182378	A_23_P61180	ref|Homo sapiens phosphatidylinositol-specific phospholipase C, X domain containing 1 (PLCXD1), mRNA [NM_018390]	-0.237587	0.848162	9.24809	-10.992	7.89e-06	0.000165667	4.07713
20158	280636	C11orf31	chromosome 11 open reading frame 31	Hs.655373	ENSG00000211450	A_23_P340318	ref|Homo sapiens chromosome 11 open reading frame 31 (C11orf31), mRNA [NM_170746]	-0.23638	0.848872	12.6872	-10.9674	8.02e-06	0.000167253	4.06003
39949	219654	ZCCHC24	zinc finger, CCHC domain containing 24	Hs.523080	ENSG00000165424	A_23_P335452	ref|Homo sapiens zinc finger, CCHC domain containing 24 (ZCCHC24), mRNA [NM_153367]	-0.236199	0.848979	6.49913	-9.09037	2.93e-05	0.000387437	2.63772
35570	10850	CCL27	chemokine (C-C motif) ligand 27	Hs.648124	ENSG00000213927	A_23_P135248	ref|Homo sapiens chemokine (C-C motif) ligand 27 (CCL27), mRNA [NM_006664]	-0.236107	0.849033	5.3597	-9.97214	1.55e-05	0.000255286	3.33623
41805	9892	SNAP91	synaptosomal-associated protein, 91kDa homolog (mouse)	Hs.368046	ENSG00000065609	A_23_P214803	ref|Homo sapiens synaptosomal-associated protein, 91kDa homolog (mouse) (SNAP91), mRNA [NM_014841]	-0.235921	0.849143	4.94468	-3.76539	0.00640705	0.0203033	-3.26827
5960	79157	MFSD11	major facilitator superfamily domain containing 11	Hs.73965	ENSG00000092931	A_23_P26704	ref|Homo sapiens major facilitator superfamily domain containing 11 (MFSD11), mRNA [NM_024311]	-0.235914	0.849147	8.28318	-9.61259	2e-05	0.000302238	3.05836
6270	221016	CCDC7	coiled-coil domain containing 7	Hs.585464	ENSG00000216937	A_23_P374294	ref|Homo sapiens coiled-coil domain containing 7 (CCDC7), transcript variant 1, mRNA [NM_145023]	-0.235827	0.849198	6.44141	-7.96095	7.18e-05	0.000708822	1.6511
8906	57348	TTYH1	tweety homolog 1 (Drosophila)	Hs.268728	ENSG00000167614	A_23_P50817	ref|Homo sapiens tweety homolog 1 (Drosophila) (TTYH1), transcript variant 1, mRNA [NM_020659]	-0.235816	0.849205	6.63643	-8.35504	5.19e-05	0.000564242	2.00813
30895	2820	GPD2	glycerol-3-phosphate dehydrogenase 2 (mitochondrial)	Hs.512382	ENSG00000115159	A_23_P119812	ref|Homo sapiens glycerol-3-phosphate dehydrogenase 2 (mitochondrial) (GPD2), nuclear gene encoding mitochondrial protein, transcript variant 2, mRNA [NM_000408]	-0.2357	0.849273	6.27826	-8.03209	6.76e-05	0.000679932	1.71662
40099	64976	MRPL40	mitochondrial ribosomal protein L40	Hs.431307	ENSG00000185608	A_24_P228667	ref|Homo sapiens mitochondrial ribosomal protein L40 (MRPL40), nuclear gene encoding mitochondrial protein, mRNA [NM_003776]	-0.23558	0.849343	9.48462	-8.33653	5.27e-05	0.000570723	1.99168
42408	6336	SCN10A	sodium channel, voltage-gated, type X, alpha subunit	Hs.250443	ENSG00000185313	A_23_P158555	ref|Homo sapiens sodium channel, voltage-gated, type X, alpha subunit (SCN10A), mRNA [NM_006514]	-0.235522	0.849377	4.97421	-4.88825	0.00153985	0.00670608	-1.72201
36157	7113	TMPRSS2	transmembrane protease, serine 2	Hs.439309	ENSG00000184012	A_23_P29067	ref|Homo sapiens transmembrane protease, serine 2 (TMPRSS2), transcript variant 2, mRNA [NM_005656]	-0.235277	0.849522	5.70911	-8.56586	4.39e-05	0.000504234	2.19334
5535	23416	KCNH3	potassium voltage-gated channel, subfamily H (eag-related), member 3	Hs.64064	ENSG00000135519	A_23_P87917	ref|Homo sapiens potassium voltage-gated channel, subfamily H (eag-related), member 3 (KCNH3), mRNA [NM_012284]	-0.235221	0.849555	6.65986	-6.54471	0.000258403	0.00176869	0.238315
43313	115650	TNFRSF13C	tumor necrosis factor receptor superfamily, member 13C	Hs.344088	ENSG00000159958	A_23_P91764	ref|Homo sapiens tumor necrosis factor receptor superfamily, member 13C (TNFRSF13C), mRNA [NM_052945]	-0.235171	0.849584	5.76973	-7.91744	7.44e-05	0.000726541	1.6108
2754	7695	ZNF136	zinc finger protein 136	Hs.479874	ENSG00000196646	A_23_P147121	ref|Homo sapiens zinc finger protein 136 (ZNF136), mRNA [NM_003437]	-0.235108	0.849621	7.20657	-9.03628	3.05e-05	0.000396883	2.59294
43093	2110	ETFDH	electron-transferring-flavoprotein dehydrogenase	Hs.155729	ENSG00000171503	A_23_P61447	ref|Homo sapiens electron-transferring-flavoprotein dehydrogenase (ETFDH), nuclear gene encoding mitochondrial protein, mRNA [NM_004453]	-0.234826	0.849788	9.26732	-9.89716	1.63e-05	0.000264722	3.27905
24176	4502	MT2A	metallothionein 2A	Hs.647371	ENSG00000125148	A_23_P106844	ref|Homo sapiens metallothionein 2A (MT2A), mRNA [NM_005953]	-0.23477	0.84982	14.7285	-4.87283	0.00156832	0.00679731	-1.74203
32281	83444	INO80B	INO80 complex subunit B	Hs.410786	ENSG00000115274	A_23_P56673	ref|Homo sapiens INO80 complex subunit B (INO80B), mRNA [NM_031288]	-0.234396	0.850041	7.60673	-10.9541	8.08e-06	0.000168271	4.05076
14414	221883	HOXA11-AS1	HOXA11 antisense RNA 1 (non-protein coding)	Hs.587427	NA	A_24_P280983	ref|Homo sapiens HOXA11 antisense RNA (non-protein coding) (HOXA11AS), non-coding RNA [NR_002795]	-0.234155	0.850183	8.60274	-7.1379	0.000147507	0.00117984	0.856408
24039	126299	ZNF428	zinc finger protein 428	Hs.99093	ENSG00000131116	A_23_P311468	ref|Homo sapiens zinc finger protein 428 (ZNF428), mRNA [NM_182498]	-0.234028	0.850257	9.18466	-9.32401	2.46e-05	0.000346853	2.8285
22897	9252	RPS6KA5	ribosomal protein S6 kinase, 90kDa, polypeptide 5	Hs.510225	ENSG00000100784	A_24_P304636	ref|Homo sapiens ribosomal protein S6 kinase, 90kDa, polypeptide 5 (RPS6KA5), transcript variant 1, mRNA [NM_004755]	-0.234018	0.850263	5.47266	-7.43225	0.000113172	0.000968949	1.14862
1048	152831	KLB	klotho beta	Hs.90756	ENSG00000134962	A_23_P350617	ref|Homo sapiens klotho beta (KLB), mRNA [NM_175737]	-0.233828	0.850376	4.91908	-2.72763	0.0280554	0.0644698	-4.82955
28519	8888	MCM3AP	minichromosome maintenance complex component 3 associated protein	Hs.389037	ENSG00000160294	A_23_P120744	ref|Homo sapiens minichromosome maintenance complex component 3 associated protein (MCM3AP), mRNA [NM_003906]	-0.233792	0.850397	11.059	-11.1959	6.94e-06	0.000152095	4.21748
35757	23241	PACS2	phosphofurin acidic cluster sorting protein 2	Hs.525626	ENSG00000179364	A_24_P393372	ref|Homo sapiens phosphofurin acidic cluster sorting protein 2 (PACS2), transcript variant 1, mRNA [NM_001100913]	-0.233677	0.850465	6.18511	-6.2724	0.000338553	0.00215672	-0.0593092
33633	100128288	LOC100128288	hypothetical LOC100128288	Hs.549913	NA	A_24_P256415	ref|Homo sapiens hypothetical protein LOC100128288 (LOC100128288), non-coding RNA [NR_024447]	-0.233581	0.850521	6.04893	-5.33864	0.000914989	0.00452291	-1.15219
23638	30000	TNPO2	transportin 2	Hs.416049	ENSG00000105576	A_23_P354953	ref|Homo sapiens transportin 2 (importin 3, karyopherin beta 2b) (TNPO2), transcript variant 2, mRNA [NM_013433]	-0.233424	0.850613	11.0711	-10.2785	1.26e-05	0.000221354	3.56587
30513	7915	ALDH5A1	aldehyde dehydrogenase 5 family, member A1	Hs.371723	ENSG00000112294	A_24_P3761	ref|Homo sapiens aldehyde dehydrogenase 5 family, member A1 (ALDH5A1), nuclear gene encoding mitochondrial protein, transcript variant 1, mRNA [NM_170740]	-0.233412	0.850621	6.68169	-9.60182	2.01e-05	0.000303634	3.0499
31789	51385	ZNF589	zinc finger protein 589	Hs.172602	ENSG00000164048	A_24_P247978	ref|Homo sapiens zinc finger protein 589 (ZNF589), mRNA [NM_016089]	-0.233354	0.850655	8.24643	-6.4255	0.000290545	0.00192709	0.109137
36071	123096	SLC25A29	solute carrier family 25, member 29	Hs.578109	ENSG00000197119	A_23_P77048	ref|Homo sapiens solute carrier family 25, member 29 (SLC25A29), nuclear gene encoding mitochondrial protein, mRNA [NM_001039355]	-0.232887	0.85093	11.7636	-7.59538	9.81e-05	0.000879388	1.30666
17928	8861	LDB1	LIM domain binding 1	Hs.454418	ENSG00000198728	A_23_P97892	ref|Homo sapiens LIM domain binding 1 (LDB1), transcript variant 3, mRNA [NM_003893]	-0.232715	0.851032	7.8054	-7.99195	6.99e-05	0.000696484	1.67972
25918	10329	TMEM5	transmembrane protein 5	Hs.216386	ENSG00000118600	A_23_P2446	ref|Homo sapiens transmembrane protein 5 (TMEM5), mRNA [NM_014254]	-0.232596	0.851102	8.77977	-9.00384	3.13e-05	0.000403285	2.56597
26922	9678	PHF14	PHD finger protein 14	Hs.655688	ENSG00000106443	A_23_P134384	ref|Homo sapiens PHD finger protein 14 (PHF14), transcript variant 2, mRNA [NM_014660]	-0.232584	0.851109	9.33506	-9.6862	1.9e-05	0.000291943	3.11601
7626	400629	TEX19	testis expressed 19	Hs.231897	ENSG00000182459	A_23_P375165	ref|Homo sapiens FLJ35767 protein (FLJ35767), mRNA [NM_207459]	-0.232487	0.851167	5.68184	-9.58363	2.04e-05	0.000305655	3.03558
32203	112752	IFT43	intraflagellar transport 43 homolog (Chlamydomonas)	Hs.532626	ENSG00000119650	A_23_P48728	ref|Homo sapiens chromosome 14 open reading frame 179 (C14orf179), transcript variant 1, mRNA [NM_052873]	-0.232176	0.85135	9.10779	-10.1345	1.39e-05	0.000236942	3.45875
19691	6526	SLC5A3	solute carrier family 5 (sodium/myo-inositol cotransporter), member 3	Hs.302742	ENSG00000198743	A_23_P109304	ref|Homo sapiens solute carrier family 5 (sodium/myo-inositol cotransporter), member 3 (SLC5A3), mRNA [NM_006933]	-0.232168	0.851355	11.8071	-10.9334	8.19e-06	0.000169699	4.03631
37522	151987	PPP4R2	protein phosphatase 4, regulatory subunit 2	Hs.431092	ENSG00000163605	A_32_P228775	ref|Homo sapiens protein phosphatase 4, regulatory subunit 2 (PPP4R2), mRNA [NM_174907]	-0.232023	0.85144	7.8197	-7.68469	9.08e-05	0.000832642	1.39203
26731	402483	FLJ45340	hypothetical LOC402483	Hs.465593, Hs.722350	NA	A_32_P50406	ref|Homo sapiens hypothetical LOC402483 (FLJ45340), non-coding RNA [NR_024368]	-0.232021	0.851442	9.05361	-11.0852	7.44e-06	0.000159362	4.14163
34442	6612	SUMO3	SMT3 suppressor of mif two 3 homolog 3 (S. cerevisiae)	Hs.474005	ENSG00000184900	A_24_P245767	ref|Homo sapiens SMT3 suppressor of mif two 3 homolog 3 (S. cerevisiae) (SUMO3), mRNA [NM_006936]	-0.232001	0.851453	7.20081	-9.32424	2.46e-05	0.000346853	2.82869
63	3382	ICA1	islet cell autoantigen 1, 69kDa	Hs.487561	ENSG00000003147	A_23_P215419	ref|Homo sapiens islet cell autoantigen 1, 69kDa (ICA1), transcript variant 2, mRNA [NM_004968]	-0.231877	0.851526	7.22958	-8.51745	4.56e-05	0.00051781	2.15116
37918	22980	TCF25	transcription factor 25 (basic helix-loop-helix)	Hs.415342	ENSG00000141002	A_23_P49220	ref|Homo sapiens transcription factor 25 (basic helix-loop-helix) (TCF25), mRNA [NM_014972]	-0.231744	0.851605	9.84695	-11.1076	7.34e-06	0.000157681	4.157
21102	126567	C2CD4C	C2 calcium-dependent domain containing 4C	Hs.223770	ENSG00000183186	A_32_P82895	ref|Homo sapiens family with sequence similarity 148, member C (FAM148C), mRNA [NM_001136263]	-0.231694	0.851634	8.81076	-10.5875	1.02e-05	0.000195228	3.79123
1886	348110	C15orf38	chromosome 15 open reading frame 38	Hs.728822	ENSG00000242498	A_23_P106425	ref|Homo sapiens chromosome 15 open reading frame 38 (C15orf38), mRNA [NM_182616]	-0.231525	0.851734	7.41703	-9.31813	2.47e-05	0.000347985	2.82375
19293	26297	SERGEF	secretion regulating guanine nucleotide exchange factor	Hs.32470	ENSG00000129158	A_24_P364087	ref|Homo sapiens secretion regulating guanine nucleotide exchange factor (SERGEF), mRNA [NM_012139]	-0.231204	0.851924	8.12437	-8.41281	4.95e-05	0.000546596	2.05928
21908	145757	LOC145757	hypothetical LOC145757	Hs.612155, Hs.730396	NA	A_32_P145039	gb|Homo sapiens cDNA FLJ31972 fis, clone NT2RP7008142. [AK056534]	-0.231204	0.851924	6.30069	-8.50581	4.6e-05	0.000519823	2.14099
3175	23313	KIAA0930	KIAA0930	Hs.592207	ENSG00000100364	A_24_P32252	ref|Homo sapiens chromosome 22 open reading frame 9 (C22orf9), transcript variant 1, mRNA [NM_015264]	-0.231201	0.851925	6.30599	-4.13604	0.00391989	0.0137977	-2.73842
27002	283991	FAM100B	family with sequence similarity 100, member B	Hs.644033	ENSG00000185262	A_24_P194714	ref|Homo sapiens family with sequence similarity 100, member B (FAM100B), mRNA [NM_182565]	-0.23118	0.851938	10.5458	-6.69214	0.000224012	0.00159628	0.395722
38928	220082	SPERT	spermatid associated	Hs.186363	ENSG00000174015	A_32_P56604	ref|Homo sapiens spermatid associated (SPERT), mRNA [NM_152719]	-0.231074	0.852	7.54009	-10.9129	8.3e-06	0.000170946	4.02203
24257	2060	EPS15	epidermal growth factor receptor pathway substrate 15	Hs.83722	ENSG00000085832	A_24_P28578	ref|Homo sapiens epidermal growth factor receptor pathway substrate 15 (EPS15), mRNA [NM_001981]	-0.230936	0.852082	6.34881	-9.59311	2.03e-05	0.000304426	3.04304
3697	23354	HAUS5	HAUS augmin-like complex, subunit 5	Hs.7426	ENSG00000249115	A_23_P349771	ref|Homo sapiens KIAA0841 (KIAA0841), mRNA [NM_015302]	-0.230631	0.852262	7.54763	-7.51312	0.000105379	0.000922113	1.22731
13142	495	ATP4A	ATPase, H+/K+ exchanging, alpha polypeptide	Hs.36992	ENSG00000105675	A_23_P430728	ref|Homo sapiens ATPase, H+/K+ exchanging, alpha polypeptide (ATP4A), mRNA [NM_000704]	-0.230619	0.852269	7.76094	-7.74811	8.59e-05	0.000802027	1.45216
26817	246184	CDC26	cell division cycle 26 homolog (S. cerevisiae)	Hs.727648	ENSG00000176386	A_32_P228501	ref|Homo sapiens cell division cycle 26 homolog (S. cerevisiae) (CDC26), mRNA [NM_139286]	-0.230271	0.852475	9.1081	-10.4125	1.15e-05	0.000210676	3.66442
4868	6764	ST5	suppression of tumorigenicity 5	Hs.117715	ENSG00000166444	A_23_P24884	ref|Homo sapiens suppression of tumorigenicity 5 (ST5), transcript variant 1, mRNA [NM_005418]	-0.230175	0.852532	7.89704	-8.55041	4.44e-05	0.000508654	2.17991
5632	91373	UAP1L1	UDP-N-acteylglucosamine pyrophosphorylase 1-like 1	Hs.142076	ENSG00000197355	A_23_P135164	ref|Homo sapiens UDP-N-acteylglucosamine pyrophosphorylase 1-like 1 (UAP1L1), mRNA [NM_207309]	-0.230024	0.852621	7.61991	-9.01062	3.11e-05	0.00040206	2.57162
19364	23032	USP33	ubiquitin specific peptidase 33	Hs.480597	ENSG00000077254	A_24_P402495	ref|Homo sapiens ubiquitin specific peptidase 33 (USP33), transcript variant 1, mRNA [NM_015017]	-0.229965	0.852656	8.33712	-3.93506	0.00510365	0.0170028	-3.02348
34815	283385	MORN3	MORN repeat containing 3	Hs.434154	ENSG00000139714	A_23_P332340	ref|Homo sapiens MORN repeat containing 3 (MORN3), mRNA [NM_173855]	-0.229758	0.852778	5.16539	-10.3311	1.22e-05	0.00021733	3.60473
1086	6553	SLC9A5	solute carrier family 9 (sodium/hydrogen exchanger), member 5	Hs.439650	ENSG00000135740	A_23_P129433	ref|Homo sapiens solute carrier family 9 (sodium/hydrogen exchanger), member 5 (SLC9A5), mRNA [NM_004594]	-0.229652	0.85284	8.89163	-9.81668	1.73e-05	0.000275026	3.21722
25018	29954	POMT2	protein-O-mannosyltransferase 2	Hs.132989	ENSG00000009830	A_24_P111134	ref|Homo sapiens protein-O-mannosyltransferase 2 (POMT2), mRNA [NM_013382]	-0.229608	0.852867	7.99677	-7.87624	7.71e-05	0.000743784	1.57245
36921	2876	GPX1	glutathione peroxidase 1	Hs.76686	ENSG00000233276	A_23_P250671	ref|Homo sapiens glutathione peroxidase 1 (GPX1), transcript variant 2, mRNA [NM_201397]	-0.229446	0.852962	12.4286	-9.11592	2.87e-05	0.000382444	2.65879
6541	8027	STAM	signal transducing adaptor molecule (SH3 domain and ITAM motif) 1	Hs.335391	ENSG00000256941, ENSG00000136738	A_23_P1343	ref|Homo sapiens signal transducing adaptor molecule (SH3 domain and ITAM motif) 1 (STAM), mRNA [NM_003473]	-0.22935	0.853019	7.70614	-8.42431	4.91e-05	0.000543661	2.06942
6842	5094	PCBP2	poly(rC) binding protein 2	Hs.546271	ENSG00000197111	A_23_P204052	ref|Homo sapiens poly(rC) binding protein 2 (PCBP2), transcript variant 2, mRNA [NM_031989]	-0.229314	0.85304	8.74484	-9.11567	2.88e-05	0.000382444	2.65859
18790	124045	C16orf55	chromosome 16 open reading frame 55	Hs.655171	ENSG00000167523	A_32_P107493	ref|Homo sapiens chromosome 16 open reading frame 55 (C16orf55), mRNA [NM_153025]	-0.229172	0.853124	6.73813	-5.95742	0.000467752	0.00273255	-0.415126
8362	128710	C20orf94	chromosome 20 open reading frame 94	Hs.668782	ENSG00000149346	A_23_P364766	ref|Homo sapiens chromosome 20 open reading frame 94 (C20orf94), mRNA [NM_001009608]	-0.22917	0.853126	8.8296	-9.87632	1.66e-05	0.000267303	3.26308
39031	56147	PCDHA1	protocadherin alpha 1	Hs.199343	ENSG00000204970	A_24_P146138	ref|Homo sapiens protocadherin alpha 1 (PCDHA1), transcript variant 2, mRNA [NM_031410]	-0.229158	0.853133	9.57037	-9.66757	1.92e-05	0.000293958	3.10145
20582	55872	PBK	PDZ binding kinase	Hs.104741	ENSG00000168078	A_32_P62997	ref|Homo sapiens PDZ binding kinase (PBK), mRNA [NM_018492]	-0.229148	0.853138	10.789	-8.95848	3.24e-05	0.000412236	2.52812
31236	155368	WBSCR27	Williams Beuren syndrome chromosome region 27	Hs.647042	ENSG00000165171	A_23_P381017	ref|Homo sapiens Williams Beuren syndrome chromosome region 27 (WBSCR27), mRNA [NM_152559]	-0.229036	0.853205	6.9282	-10.2183	1.31e-05	0.000227672	3.52124
16946	3590	IL11RA	interleukin 11 receptor, alpha	Hs.591088	ENSG00000137070	A_23_P71867	ref|Homo sapiens interleukin 11 receptor, alpha (IL11RA), transcript variant 2, mRNA [NM_147162]	-0.228411	0.853574	7.67704	-10.7787	9.05e-06	0.000180524	3.92763
11941	64787	EPS8L2	EPS8-like 2	Hs.55016	ENSG00000177106	A_23_P147822	ref|Homo sapiens EPS8-like 2 (EPS8L2), mRNA [NM_022772]	-0.228098	0.85376	9.45033	-7.25246	0.00013292	0.00109233	0.971242
38909	55769	ZNF83	zinc finger protein 83	Hs.467210, Hs.659798, Hs.665751, Hs.710125	ENSG00000167766	A_23_P89145	ref|Homo sapiens zinc finger protein 83 (ZNF83), transcript variant 5, mRNA [NM_018300]	-0.227936	0.853856	8.03757	-11.0532	7.59e-06	0.000161583	4.11951
27068	27336	HTATSF1	HIV-1 Tat specific factor 1	Hs.204475	ENSG00000102241	A_23_P45345	ref|Homo sapiens HIV-1 Tat specific factor 1 (HTATSF1), mRNA [NM_014500]	-0.227827	0.85392	10.5965	-9.88436	1.65e-05	0.000266301	3.26925
32935	51107	APH1A	anterior pharynx defective 1 homolog A (C. elegans)	Hs.108408	ENSG00000117362	A_23_P12329	ref|Homo sapiens anterior pharynx defective 1 homolog A (C. elegans) (APH1A), transcript variant 2, mRNA [NM_016022]	-0.227425	0.854158	7.18434	-5.191	0.00108187	0.0051209	-1.3358
27134	55501	CHST12	carbohydrate (chondroitin 4) sulfotransferase 12	Hs.213088	ENSG00000136213	A_23_P310421	ref|Homo sapiens carbohydrate (chondroitin 4) sulfotransferase 12 (CHST12), mRNA [NM_018641]	-0.226961	0.854433	9.50041	-7.86231	7.8e-05	0.000749101	1.55946
6264	7265	TTC1	tetratricopeptide repeat domain 1	Hs.519718	ENSG00000113312	A_23_P19164	ref|Homo sapiens tetratricopeptide repeat domain 1 (TTC1), mRNA [NM_003314]	-0.226869	0.854487	10.4073	-7.78756	8.31e-05	0.000783334	1.48938
41419	124446	TMEM219	transmembrane protein 219	Hs.460574	ENSG00000149932	A_23_P77562	ref|Homo sapiens transmembrane protein 219 (TMEM219), transcript variant 2, mRNA [NM_194280]	-0.226597	0.854649	9.61846	-6.01223	0.000441791	0.00261827	-0.352301
21380	100527964	LOC100527964	hypothetical LOC100527964	Hs.496545	NA	A_24_P519638	gb|Homo sapiens cDNA FLJ38931 fis, clone NT2NE2013189. [AK096250]	-0.226591	0.854652	8.68405	-7.66503	9.23e-05	0.00084245	1.3733
33125	150709	ANKAR	ankyrin and armadillo repeat containing	Hs.60772, Hs.655700	ENSG00000151687	A_23_P370544	ref|Homo sapiens ankyrin and armadillo repeat containing (ANKAR), mRNA [NM_144708]	-0.226362	0.854788	6.25103	-10.5644	1.04e-05	0.00019666	3.7746
6977	10922	FASTK	Fas-activated serine/threonine kinase	Hs.647094	ENSG00000164896	A_23_P215140	ref|Homo sapiens Fas-activated serine/threonine kinase (FASTK), transcript variant 1, mRNA [NM_006712]	-0.22614	0.854919	9.50206	-9.17617	2.75e-05	0.000371881	2.70828
8135	100132406	NBPF10	neuroblastoma breakpoint family, member 10	Hs.714127, Hs.721588	ENSG00000163386	A_32_P83465	ref|Homo sapiens neuroblastoma breakpoint family, member 10 (NBPF10), mRNA [NM_001039703]	-0.226072	0.85496	14.878	-5.06232	0.00125503	0.00573999	-1.49836
29445	5891	MOK	MOK protein kinase	Hs.104119	ENSG00000080823	A_23_P76731	ref|Homo sapiens renal tumor antigen (RAGE), mRNA [NM_014226]	-0.225828	0.855104	12.503	-9.92271	1.61e-05	0.000261538	3.29858
16469	57610	RANBP10	RAN binding protein 10	Hs.368569	ENSG00000141084	A_23_P369733	ref|Homo sapiens RAN binding protein 10 (RANBP10), mRNA [NM_020850]	-0.225579	0.855252	9.61694	-9.37192	2.38e-05	0.000338331	2.86709
18150	9526	MPDU1	mannose-P-dolichol utilization defect 1	Hs.246381	ENSG00000129255	A_24_P198844	ref|Homo sapiens mannose-P-dolichol utilization defect 1 (MPDU1), transcript variant 1, mRNA [NM_004870]	-0.225495	0.855301	9.2838	-5.75849	0.000577271	0.00318896	-0.646467
1234	153222	C5orf41	chromosome 5 open reading frame 41	Hs.484195	ENSG00000164463	A_23_P404606	ref|Homo sapiens chromosome 5 open reading frame 41 (C5orf41), mRNA [NM_153607]	-0.225447	0.85533	8.59035	-9.92111	1.61e-05	0.000261613	3.29736
26530	63899	NSUN3	NOP2/Sun domain family, member 3	Hs.448003	ENSG00000178694	A_23_P21785	ref|Homo sapiens NOL1/NOP2/Sun domain family, member 3 (NSUN3), mRNA [NM_022072]	-0.225395	0.855361	8.14325	-8.14923	6.14e-05	0.000633947	1.82347
39980	374819	LRRC37A3	leucine rich repeat containing 37, member A3	Hs.551962	ENSG00000176809	A_23_P331400	ref|Homo sapiens leucine rich repeat containing 37, member A3 (LRRC37A3), mRNA [NM_199340]	-0.225241	0.855452	5.78418	-8.00611	6.91e-05	0.000691525	1.69275
42043	2998	GYS2	glycogen synthase 2 (liver)	Hs.82614	ENSG00000111713	A_23_P36621	ref|Homo sapiens glycogen synthase 2 (liver) (GYS2), mRNA [NM_021957]	-0.225125	0.855521	4.89637	-5.50243	0.0007624	0.00393923	-0.952018
31041	9121	SLC16A5	solute carrier family 16, member 5 (monocarboxylic acid transporter 6)	Hs.592095	ENSG00000170190	A_23_P159125	ref|Homo sapiens solute carrier family 16, member 5 (monocarboxylic acid transporter 6) (SLC16A5), mRNA [NM_004695]	-0.225097	0.855538	11.7044	-8.95876	3.24e-05	0.000412236	2.52835
36533	83707	TRPT1	tRNA phosphotransferase 1	Hs.326586	ENSG00000149743	A_23_P98248	ref|Homo sapiens tRNA phosphotransferase 1 (TRPT1), transcript variant 1, mRNA [NM_001033678]	-0.225027	0.855579	9.68901	-8.9333	3.3e-05	0.000417283	2.50703
43214	79990	PLEKHH3	pleckstrin homology domain containing, family H (with MyTH4 domain) member 3	Hs.632251	ENSG00000068137	A_32_P172188	ref|Homo sapiens pleckstrin homology domain containing, family H (with MyTH4 domain) member 3 (PLEKHH3), mRNA [NM_024927]	-0.225005	0.855592	9.48429	-5.86964	0.000512939	0.00292023	-0.51656
17870	23125	CAMTA2	calmodulin binding transcription activator 2	Hs.632242	ENSG00000108509	A_23_P365189	ref|Homo sapiens calmodulin binding transcription activator 2 (CAMTA2), mRNA [NM_015099]	-0.224747	0.855745	6.31631	-10.7938	8.96e-06	0.000179601	3.93828
42338	100505483	LOC100505483	hypothetical LOC100505483	Hs.649054	NA	A_24_P735306	gb|Homo sapiens cDNA clone IMAGE:40108910. [BC131560]	-0.224623	0.855818	6.31426	-9.72298	1.85e-05	0.000286972	3.14466
32837	55751	TMEM184C	transmembrane protein 184C	Hs.203896	ENSG00000164168	A_23_P18739	ref|Homo sapiens transmembrane protein 184C (TMEM184C), mRNA [NM_018241]	-0.22462	0.85582	6.78456	-7.83634	7.97e-05	0.000760852	1.53517
40203	7251	TSG101	tumor susceptibility gene 101	Hs.523512	ENSG00000074319	A_23_P75839	ref|Homo sapiens tumor susceptibility gene 101 (TSG101), mRNA [NM_006292]	-0.22443	0.855933	10.071	-5.99637	0.000449135	0.00264697	-0.370442
29586	3679	ITGA7	integrin, alpha 7	Hs.524484	ENSG00000135424	A_23_P128084	ref|Homo sapiens integrin, alpha 7 (ITGA7), mRNA [NM_002206]	-0.224319	0.855999	7.33169	-8.50982	4.59e-05	0.000518818	2.14449
40127	55112	WDR60	WD repeat domain 60	Hs.389945	ENSG00000126870	A_23_P157361	ref|Homo sapiens WD repeat domain 60 (WDR60), mRNA [NM_018051]	-0.224214	0.856061	7.56139	-7.96739	7.14e-05	0.00070597	1.65706
31252	11105	PRDM7	PR domain containing 7	Hs.406695	ENSG00000126856	A_23_P49230	ref|Homo sapiens PR domain containing 7 (PRDM7), transcript variant 2, mRNA [NM_052996]	-0.224089	0.856135	4.98971	-9.92359	1.61e-05	0.000261538	3.29925
39619	123	PLIN2	perilipin 2	Hs.3416	ENSG00000147872	A_23_P134953	ref|Homo sapiens adipose differentiation-related protein (ADFP), mRNA [NM_001122]	-0.223918	0.856237	6.82791	-5.19212	0.00108049	0.00511652	-1.33441
5380	140885	SIRPA	signal-regulatory protein alpha	Hs.581021	ENSG00000198053	A_24_P259083	ref|Homo sapiens signal-regulatory protein alpha (SIRPA), transcript variant 1, mRNA [NM_001040022]	-0.223874	0.856263	5.22128	-6.36148	0.000309629	0.00201915	0.0390545
3857	84501	SPIRE2	spire homolog 2 (Drosophila)	Hs.461786	ENSG00000204991	A_23_P37825	ref|Homo sapiens spire homolog 2 (Drosophila) (SPIRE2), mRNA [NM_032451]	-0.223741	0.856342	7.76032	-7.86784	7.76e-05	0.000746596	1.56462
41884	91151	TIGD7	tigger transposable element derived 7	Hs.161287	ENSG00000140993	A_23_P129577	ref|Homo sapiens tigger transposable element derived 7 (TIGD7), mRNA [NM_033208]	-0.22366	0.85639	5.44496	-7.43208	0.000113189	0.000968949	1.14846
8784	6902	TBCA	tubulin folding cofactor A	Hs.291212	ENSG00000171530	A_23_P167698	ref|Homo sapiens tubulin folding cofactor A (TBCA), mRNA [NM_004607]	-0.223631	0.856407	14.5989	-9.65271	1.94e-05	0.00029625	3.08983
839	441194	PMS2CL	PMS2 C-terminal like pseudogene	Hs.715590	NA	A_23_P6589	gb|Homo sapiens PMS2 C-terminal like pseudogene, mRNA (cDNA clone IMAGE:5273238). [BC041364]	-0.222905	0.856838	8.41918	-10.5652	1.04e-05	0.00019666	3.77517
2114	29057	FAM156A	family with sequence similarity 156, member A	Hs.6451, Hs.653131	ENSG00000179304, ENSG00000182646	A_23_P148519	ref|Homo sapiens family with sequence similarity 156, member A (FAM156A), mRNA [NM_014138]	-0.222837	0.856879	11.06	-8.75314	3.79e-05	0.000456953	2.35465
39750	10211	FLOT1	flotillin 1	Hs.179986	ENSG00000223654, ENSG00000236271, ENSG00000206480, ENSG00000230143, ENSG00000137312, ENSG00000224740, ENSG00000232280, ENSG00000206379	A_23_P314526	ref|Homo sapiens flotillin 1 (FLOT1), mRNA [NM_005803]	-0.222816	0.856891	7.31128	-6.09438	0.000405829	0.00245958	-0.258861
19717	253639	ZNF620	zinc finger protein 620	Hs.581541	ENSG00000177842	A_32_P308779	ref|Homo sapiens zinc finger protein 620 (ZNF620), transcript variant 1, mRNA [NM_175888]	-0.222511	0.857073	5.45482	-8.10012	6.39e-05	0.000652837	1.77883
17285	5636	PRPSAP2	phosphoribosyl pyrophosphate synthetase-associated protein 2	Hs.632236	ENSG00000141127	A_23_P49646	ref|Homo sapiens phosphoribosyl pyrophosphate synthetase-associated protein 2 (PRPSAP2), mRNA [NM_002767]	-0.222499	0.85708	9.00006	-6.41783	0.000292762	0.0019358	0.100761
35949	7879	RAB7A	RAB7A, member RAS oncogene family	Hs.722215	ENSG00000075785	A_24_P234572	ref|Homo sapiens RAB7A, member RAS oncogene family (RAB7A), mRNA [NM_004637]	-0.222412	0.857131	9.42205	-10.6757	9.67e-06	0.000188468	3.85442
15188	387328	ZNF322P1	zinc finger protein 322 pseudogene 1	Hs.648180	ENSG00000188801	A_32_P163533	ref|Homo sapiens zinc finger protein 322B (ZNF322B), mRNA [NM_199005]	-0.222209	0.857252	6.60368	-7.14359	0.000146741	0.00117545	0.862144
9053	832	CAPZB	capping protein (actin filament) muscle Z-line, beta	Hs.432760, Hs.661292	ENSG00000077549	A_23_P126752	ref|Homo sapiens capping protein (actin filament) muscle Z-line, beta (CAPZB), mRNA [NM_004930]	-0.222191	0.857262	9.75546	-9.22944	2.64e-05	0.000361491	2.7518
32009	7905	REEP5	receptor accessory protein 5	Hs.429608	ENSG00000129625	A_32_P131377	ref|Homo sapiens receptor accessory protein 5 (REEP5), mRNA [NM_005669]	-0.221915	0.857427	10.0368	-9.69395	1.89e-05	0.000290961	3.12205
1349	9050	PSTPIP2	proline-serine-threonine phosphatase interacting protein 2	Hs.567384	ENSG00000152229	A_23_P208119	ref|Homo sapiens proline-serine-threonine phosphatase interacting protein 2 (PSTPIP2), mRNA [NM_024430]	-0.221886	0.857444	5.66663	-3.7497	0.00654468	0.0206655	-3.2911
28634	57584	ARHGAP21	Rho GTPase activating protein 21	Hs.524195	ENSG00000107863	A_23_P115608	ref|Homo sapiens Rho GTPase activating protein 21 (ARHGAP21), mRNA [NM_020824]	-0.221842	0.85747	7.13881	-9.06574	2.98e-05	0.000391459	2.61736
17578	6311	ATXN2	ataxin 2	Hs.76253	ENSG00000204842	A_23_P389907	ref|Homo sapiens ataxin 2 (ATXN2), mRNA [NM_002973]	-0.221662	0.857577	10.4237	-10.6086	1.01e-05	0.000193819	3.8064
37896	100506436	SPAG5-AS1	SPAG5 antisense RNA 1 (non-protein coding)	Hs.715828	NA	A_24_P700052	gb|Homo sapiens cDNA FLJ25772 fis, clone TST06461. [AK098638]	-0.221466	0.857694	5.58596	-6.36145	0.000309639	0.00201915	0.0390187
37487	84327	ZBED3	zinc finger, BED-type containing 3	Hs.584988	ENSG00000132846	A_23_P93032	ref|Homo sapiens zinc finger, BED-type containing 3 (ZBED3), mRNA [NM_032367]	-0.221248	0.857823	9.73213	-10.4712	1.11e-05	0.000204693	3.70714
23371	4221	MEN1	multiple endocrine neoplasia I	Hs.423348	ENSG00000133895	A_23_P75453	ref|Homo sapiens multiple endocrine neoplasia I (MEN1), transcript variant e1E, mRNA [NM_130803]	-0.221079	0.857924	8.38462	-6.65152	0.000232947	0.00163974	0.352614
40681	10565	ARFGEF1	ADP-ribosylation factor guanine nucleotide-exchange factor 1 (brefeldin A-inhibited)	Hs.656902	ENSG00000066777	A_23_P82941	ref|Homo sapiens ADP-ribosylation factor guanine nucleotide-exchange factor 1(brefeldin A-inhibited) (ARFGEF1), mRNA [NM_006421]	-0.221	0.857971	8.53535	-9.7774	1.78e-05	0.000279857	3.18688
35179	10276	NET1	neuroepithelial cell transforming 1	Hs.25155	ENSG00000173848	A_23_P83931	ref|Homo sapiens neuroepithelial cell transforming 1 (NET1), transcript variant 1, mRNA [NM_001047160]	-0.220749	0.85812	10.3074	-6.94911	0.00017562	0.00133846	0.664038
14564	165545	DQX1	DEAQ box RNA-dependent ATPase 1	Hs.191705	ENSG00000144045	A_23_P56659	ref|Homo sapiens DEAQ box polypeptide 1 (RNA-dependent ATPase) (DQX1), mRNA [NM_133637]	-0.220333	0.858367	6.286	-5.4188	0.000836458	0.00422181	-1.05376
36415	414328	C9orf103	chromosome 9 open reading frame 103	Hs.530261	ENSG00000148057	A_23_P123732	ref|Homo sapiens chromosome 9 open reading frame 103 (C9orf103), mRNA [NM_001001551]	-0.220282	0.858398	7.27541	-8.5256	4.53e-05	0.000515896	2.15827
3346	54799	MBTD1	mbt domain containing 1	Hs.656803	ENSG00000011258	A_23_P107238	gb|Homo sapiens cDNA FLJ42067 fis, clone SYNOV2007965, moderately similar to Homo sapiens mRNA for H-l(3)mbt-like protein. [AK124061]	-0.220077	0.85852	7.18459	-9.04666	3.03e-05	0.000394679	2.60156
35082	100506513	CATX-1	hypothetical LOC100506513	Hs.676466	NA	A_24_P238412	gb|Homo sapiens CATX-1 mRNA, partial cds. [AF083117]	-0.220029	0.858548	4.9849	-3.39411	0.0106942	0.0302435	-3.8161
14477	64411	ARAP3	ArfGAP with RhoGAP domain, ankyrin repeat and PH domain 3	Hs.726187	ENSG00000120318	A_23_P167389	ref|Homo sapiens ArfGAP with RhoGAP domain, ankyrin repeat and PH domain 3 (ARAP3), mRNA [NM_022481]	-0.220027	0.858549	8.62478	-5.94241	0.000475157	0.00276353	-0.432406
26616	5605	MAP2K2	mitogen-activated protein kinase kinase 2	Hs.465627	ENSG00000126934	A_23_P208835	ref|Homo sapiens mitogen-activated protein kinase kinase 2 (MAP2K2), mRNA [NM_030662]	-0.219881	0.858636	12.633	-8.35721	5.18e-05	0.000563964	2.01005
9534	2644	GCHFR	GTP cyclohydrolase I feedback regulator	Hs.631717	ENSG00000137880	A_23_P77328	ref|Homo sapiens GTP cyclohydrolase I feedback regulator (GCHFR), mRNA [NM_005258]	-0.219777	0.858698	6.76596	-8.25112	5.65e-05	0.000599364	1.91537
15068	7423	VEGFB	vascular endothelial growth factor B	Hs.78781	ENSG00000173511	A_23_P1594	ref|Homo sapiens vascular endothelial growth factor B (VEGFB), mRNA [NM_003377]	-0.219712	0.858737	10.2509	-8.49438	4.64e-05	0.000523228	2.13099
16247	25841	ABTB2	ankyrin repeat and BTB (POZ) domain containing 2	Hs.23361	ENSG00000166016	A_23_P356616	ref|Homo sapiens ankyrin repeat and BTB (POZ) domain containing 2 (ABTB2), mRNA [NM_145804]	-0.219702	0.858743	8.40898	-9.03736	3.05e-05	0.000396883	2.59383
39468	4296	MAP3K11	mitogen-activated protein kinase kinase kinase 11	Hs.502872	ENSG00000173327	A_23_P98275	ref|Homo sapiens mitogen-activated protein kinase kinase kinase 11 (MAP3K11), mRNA [NM_002419]	-0.21946	0.858887	7.8896	-6.13019	0.000391179	0.00239929	-0.218393
7708	9919	SEC16A	SEC16 homolog A (S. cerevisiae)	Hs.522500, Hs.668588	ENSG00000148396	A_23_P251303	ref|Homo sapiens SEC16 homolog A (S. cerevisiae) (SEC16A), mRNA [NM_014866]	-0.219195	0.859045	9.75872	-9.87472	1.66e-05	0.000267354	3.26185
6348	157574	FBXO16	F-box protein 16	Hs.659190	ENSG00000214050	A_23_P168847	ref|Homo sapiens F-box protein 16 (FBXO16), mRNA [NM_172366]	-0.219106	0.859097	6.57237	-8.86566	3.47e-05	0.000431339	2.45014
22662	135892	TRIM50	tripartite motif containing 50	Hs.647053	ENSG00000146755	A_23_P308136	ref|Homo sapiens tripartite motif-containing 50 (TRIM50), mRNA [NM_178125]	-0.219006	0.859157	6.29557	-8.10117	6.38e-05	0.000652422	1.77979
10741	55152	DALRD3	DALR anticodon binding domain containing 3	Hs.654815, Hs.708076	ENSG00000178149	A_23_P135611	ref|Homo sapiens DALR anticodon binding domain containing 3 (DALRD3), transcript variant 2, mRNA [NM_018114]	-0.218889	0.859227	7.86424	-8.1891	5.94e-05	0.000620034	1.85954
18212	80347	COASY	CoA synthase	Hs.296422	ENSG00000068120	A_23_P4144	ref|Homo sapiens Coenzyme A synthase (COASY), nuclear gene encoding mitochondrial protein, transcript variant 1, mRNA [NM_025233]	-0.218848	0.859252	10.0424	-7.49475	0.000107095	0.00093257	1.2095
7689	81629	TSSK3	testis-specific serine kinase 3	Hs.512763	ENSG00000162526	A_23_P399681	ref|Homo sapiens testis-specific serine kinase 3 (TSSK3), mRNA [NM_052841]	-0.218731	0.859321	7.10435	-9.50641	2.16e-05	0.000318396	2.97451
25737	1666	DECR1	2,4-dienoyl CoA reductase 1, mitochondrial	Hs.492212	ENSG00000104325	A_24_P269619	ref|Homo sapiens 2,4-dienoyl CoA reductase 1, mitochondrial (DECR1), nuclear gene encoding mitochondrial protein, mRNA [NM_001359]	-0.218664	0.859361	8.97675	-10.0967	1.42e-05	0.000240975	3.43035
36730	54474	KRT20	keratin 20	Hs.84905	ENSG00000171431	A_23_P66854	ref|Homo sapiens keratin 20 (KRT20), mRNA [NM_019010]	-0.218385	0.859527	4.97102	-5.28235	0.000974998	0.00473908	-1.22183
19413	54795	TRPM4	transient receptor potential cation channel, subfamily M, member 4	Hs.467101	ENSG00000130529	A_23_P153529	ref|Homo sapiens transient receptor potential cation channel, subfamily M, member 4 (TRPM4), mRNA [NM_017636]	-0.218143	0.859671	7.75229	-4.94697	0.00143651	0.00635557	-1.64609
41658	1006	CDH8	cadherin 8, type 2	Hs.368322	ENSG00000150394	A_23_P140797	ref|Homo sapiens cadherin 8, type 2 (CDH8), mRNA [NM_001796]	-0.217976	0.859771	4.89681	-7.21255	0.00013781	0.00112004	0.9314
18458	1954	MEGF8	multiple EGF-like-domains 8	Hs.132483	ENSG00000105429	A_23_P335198	ref|Homo sapiens multiple EGF-like-domains 8 (MEGF8), mRNA [NM_001410]	-0.217941	0.859791	7.98484	-9.49123	2.18e-05	0.000320714	2.96246
11195	57333	RCN3	reticulocalbin 3, EF-hand calcium binding domain	Hs.567550	ENSG00000142552	A_23_P67339	ref|Homo sapiens reticulocalbin 3, EF-hand calcium binding domain (RCN3), mRNA [NM_020650]	-0.217765	0.859896	5.60581	-8.61904	4.21e-05	0.000491607	2.23946
27604	63910	SLC17A9	solute carrier family 17, member 9	Hs.512686	ENSG00000101194	A_23_P210361	ref|Homo sapiens chromosome 20 open reading frame 59 (C20orf59), mRNA [NM_022082]	-0.217751	0.859905	8.44971	-5.84046	0.000529023	0.00298788	-0.550513
16613	56995	TULP4	tubby like protein 4	Hs.486993	ENSG00000130338	A_23_P382045	ref|Homo sapiens tubby like protein 4 (TULP4), transcript variant 1, mRNA [NM_020245]	-0.217668	0.859954	7.81878	-8.33212	5.29e-05	0.000571905	1.98775
25807	55775	TDP1	tyrosyl-DNA phosphodiesterase 1	Hs.209945	ENSG00000042088	A_23_P117623	ref|Homo sapiens tyrosyl-DNA phosphodiesterase 1 (TDP1), transcript variant 1, mRNA [NM_018319]	-0.217623	0.859981	9.34096	-10.5791	1.03e-05	0.000196052	3.78518
27545	23400	ATP13A2	ATPase type 13A2	Hs.128866	ENSG00000159363	A_23_P12423	ref|Homo sapiens ATPase type 13A2 (ATP13A2), transcript variant 1, mRNA [NM_022089]	-0.217494	0.860058	7.50769	-5.96743	0.000462887	0.00271114	-0.403624
4942	55316	RSAD1	radical S-adenosyl methionine domain containing 1	Hs.8033	ENSG00000136444	A_23_P152807	ref|Homo sapiens radical S-adenosyl methionine domain containing 1 (RSAD1), mRNA [NM_018346]	-0.217427	0.860098	10.1081	-7.20449	0.000138821	0.00112699	0.923335
35003	53358	SHC3	SHC (Src homology 2 domain containing) transforming protein 3	Hs.292737	ENSG00000148082	A_23_P61406	ref|Homo sapiens SHC (Src homology 2 domain containing) transforming protein 3 (SHC3), mRNA [NM_016848]	-0.217405	0.860111	8.10036	-4.37202	0.00289776	0.0108656	-2.41087
31517	80317	ZKSCAN3	zinc finger with KRAB and SCAN domains 3	Hs.485004	ENSG00000189298	A_23_P168019	ref|Homo sapiens zinc finger with KRAB and SCAN domains 3 (ZKSCAN3), mRNA [NM_024493]	-0.217383	0.860124	6.76414	-8.42195	4.92e-05	0.000544457	2.06734
37069	9870	KIAA0317	KIAA0317	NA	ENSG00000119682	A_23_P369987	ref|Homo sapiens KIAA0317 (KIAA0317), mRNA [NM_001039479]	-0.217293	0.860178	8.59989	-5.50257	0.000762283	0.00393923	-0.951849
39789	56260	C8orf44	chromosome 8 open reading frame 44	Hs.661238	ENSG00000213865	A_23_P168965	ref|Homo sapiens chromosome 8 open reading frame 44 (C8orf44), mRNA [NM_019607]	-0.217168	0.860253	7.78602	-8.27135	5.55e-05	0.00059234	1.9335
20378	220929	ZNF438	zinc finger protein 438	Hs.660642	ENSG00000183621	A_23_P161156	ref|Homo sapiens zinc finger protein 438 (ZNF438), transcript variant 2, mRNA [NM_182755]	-0.217087	0.860301	7.62803	-9.68699	1.9e-05	0.000291932	3.11662
28480	5286	PIK3C2A	phosphoinositide-3-kinase, class 2, alpha polypeptide	Hs.175343	ENSG00000011405	A_23_P36166	ref|Homo sapiens phosphoinositide-3-kinase, class 2, alpha polypeptide (PIK3C2A), mRNA [NM_002645]	-0.216844	0.860446	8.7443	-7.67088	9.18e-05	0.000840146	1.37888
11022	3695	ITGB7	integrin, beta 7	Hs.654470	ENSG00000139626	A_23_P76529	ref|Homo sapiens integrin, beta 7 (ITGB7), mRNA [NM_000889]	-0.216825	0.860457	6.22186	-5.45378	0.000804555	0.00410185	-1.01109
35172	90423	ATP6V1E2	ATPase, H+ transporting, lysosomal 31kDa, V1 subunit E2	Hs.659656	ENSG00000250565	A_23_P143047	ref|Homo sapiens ATPase, H+ transporting, lysosomal 31kDa, V1 subunit E2 (ATP6V1E2), mRNA [NM_080653]	-0.216792	0.860477	5.99783	-4.09894	0.00411372	0.0143507	-2.79063
3402	677769	SCARNA17	small Cajal body-specific RNA 17	NA	NA	A_32_P37592	ref|Homo sapiens small Cajal body-specific RNA 17 (SCARNA17), non-coding RNA [NR_003003]	-0.216707	0.860527	9.37556	-8.86508	3.48e-05	0.000431339	2.44964
43013	5089	PBX2	pre-B-cell leukemia homeobox 2	Hs.509545, Hs.718462	ENSG00000225987, ENSG00000204304, ENSG00000206315, ENSG00000236353, ENSG00000237344, ENSG00000224952, ENSG00000232005	A_23_P214658	ref|Homo sapiens pre-B-cell leukemia homeobox 2 (PBX2), mRNA [NM_002586]	-0.216663	0.860554	6.46165	-4.05826	0.00433828	0.0149573	-2.84809
13026	55260	TMEM143	transmembrane protein 143	Hs.351335	ENSG00000161558	A_24_P412976	ref|Homo sapiens transmembrane protein 143 (TMEM143), mRNA [NM_018273]	-0.216613	0.860583	8.25054	-5.4344	0.000822063	0.00416661	-1.03471
11691	50831	TAS2R3	taste receptor, type 2, member 3	Hs.676011	ENSG00000127362	A_23_P20139	ref|Homo sapiens taste receptor, type 2, member 3 (TAS2R3), mRNA [NM_016943]	-0.216538	0.860628	5.17029	-5.72136	0.000600715	0.0032866	-0.690221
6523	56181	FAM54B	family with sequence similarity 54, member B	Hs.149305	ENSG00000117640	A_23_P97195	ref|Homo sapiens family with sequence similarity 54, member B (FAM54B), transcript variant 1, mRNA [NM_019557]	-0.215737	0.861106	8.96784	-9.8042	1.74e-05	0.000276433	3.2076
41489	163051	ZNF709	zinc finger protein 709	Hs.631623	ENSG00000242852, ENSG00000196826	A_24_P91405	ref|Homo sapiens zinc finger protein 709 (ZNF709), mRNA [NM_152601]	-0.215581	0.861199	6.6702	-7.75473	8.55e-05	0.000798862	1.45842
7018	51300	TIMMDC1	translocase of inner mitochondrial membrane domain containing 1	Hs.477287	ENSG00000113845	A_23_P18413	ref|Homo sapiens chromosome 3 open reading frame 1 (C3orf1), mRNA [NM_016589]	-0.215559	0.861213	12.7496	-8.10275	6.38e-05	0.000651728	1.78123
22168	9969	MED13	mediator complex subunit 13	Hs.282678	ENSG00000108510	A_23_P27247	ref|Homo sapiens mediator complex subunit 13 (MED13), mRNA [NM_005121]	-0.215478	0.861261	7.17184	-7.80536	8.18e-05	0.000776262	1.50611
42406	353088	ZNF429	zinc finger protein 429	Hs.572567, Hs.709598	ENSG00000197013	A_32_P106944	ref|Homo sapiens zinc finger protein 429 (ZNF429), mRNA [NM_001001415]	-0.215414	0.861299	5.68775	-5.16165	0.00111891	0.00525045	-1.37268
36145	90589	ZNF625	zinc finger protein 625	Hs.512823	ENSG00000257591	A_24_P344537	ref|Homo sapiens zinc finger protein 625 (ZNF625), mRNA [NM_145233]	-0.215407	0.861303	6.51979	-6.47562	0.000276516	0.00185783	0.163661
35497	10795	ZNF268	zinc finger protein 268	Hs.124047	ENSG00000090612, ENSG00000256825	A_23_P255591	gb|H.sapiens HZF3 mRNA for zinc finger protein. [X78926]	-0.21531	0.861361	6.95585	-9.24143	2.62e-05	0.000359179	2.76155
37985	94134	ARHGAP12	Rho GTPase activating protein 12	Hs.499264	ENSG00000165322	A_23_P149775	ref|Homo sapiens Rho GTPase activating protein 12 (ARHGAP12), mRNA [NM_018287]	-0.214667	0.861745	10.4528	-7.50305	0.000106316	0.00092782	1.21755
285	9746	CLSTN3	calsyntenin 3	Hs.535378	ENSG00000139182	A_23_P53724	ref|Homo sapiens calsyntenin 3 (CLSTN3), mRNA [NM_014718]	-0.214554	0.861812	8.59405	-6.30627	0.000327215	0.00210489	-0.0217933
6532	219402	MTIF3	mitochondrial translational initiation factor 3	Hs.534582	ENSG00000122033	A_23_P53788	ref|Homo sapiens mitochondrial translational initiation factor 3 (MTIF3), nuclear gene encoding mitochondrial protein, mRNA [NM_152912]	-0.214237	0.862002	9.69622	-9.49245	2.18e-05	0.000320714	2.96342
40362	59067	IL21	interleukin 21	Hs.567559	ENSG00000138684	A_23_P167250	ref|Homo sapiens interleukin 21 (IL21), mRNA [NM_021803]	-0.214208	0.862019	4.99242	-4.79484	0.00172152	0.0072992	-1.84381
28819	219541	MED19	mediator complex subunit 19	Hs.43619	ENSG00000156603	A_23_P150510	ref|Homo sapiens mediator complex subunit 19 (MED19), mRNA [NM_153450]	-0.214074	0.862099	9.02716	-8.88092	3.43e-05	0.000428191	2.46301
30433	65266	WNK4	WNK lysine deficient protein kinase 4	Hs.105448	ENSG00000126562	A_24_P327181	ref|Homo sapiens WNK lysine deficient protein kinase 4 (WNK4), mRNA [NM_032387]	-0.213957	0.862169	5.86196	-6.25635	0.000344079	0.00218198	-0.0771375
22557	339044	PKD1P1	polycystic kidney disease 1 (autosomal dominant) pseudogene 1	Hs.636569, Hs.650111	NA	A_24_P238046	gb|Homo sapiens cDNA FLJ13314 fis, clone OVARC1001506, highly similar to POLYCYSTIN PRECURSOR. [AK023376]	-0.213815	0.862254	7.22308	-8.42563	4.9e-05	0.000543224	2.07059
3864	11072	DUSP14	dual specificity phosphatase 14	Hs.91448	ENSG00000161326	A_23_P207537	ref|Homo sapiens dual specificity phosphatase 14 (DUSP14), mRNA [NM_007026]	-0.21344	0.862478	8.3225	-8.27301	5.55e-05	0.00059212	1.93499
8065	64746	ACBD3	acyl-CoA binding domain containing 3	Hs.520207	ENSG00000182827	A_23_P200477	gb|Homo sapiens gcp60 mRNA for golgi resident protein GCP60, complete cds. [AB043587]	-0.213265	0.862583	8.13276	-9.82408	1.72e-05	0.000273801	3.22293
27372	146691	TOM1L2	target of myb1-like 2 (chicken)	Hs.462379	ENSG00000175662	A_23_P141180	ref|Homo sapiens target of myb1-like 2 (chicken) (TOM1L2), transcript variant 3, mRNA [NM_001082968]	-0.213253	0.86259	9.50091	-9.08466	2.94e-05	0.000388344	2.633
25584	23380	SRGAP2	SLIT-ROBO Rho GTPase activating protein 2	Hs.497575	ENSG00000163486	A_32_P50123	ref|Homo sapiens SLIT-ROBO Rho GTPase activating protein 2 (SRGAP2), transcript variant 2, mRNA [NM_001042758]	-0.213224	0.862607	8.09427	-9.74905	1.81e-05	0.000283454	3.16491
27155	90632	LINC00473	long intergenic non-protein coding RNA 473	Hs.31917	NA	A_24_P636301	gb|full-length cDNA clone CL0BB018ZH05 of Neuroblastoma of Homo sapiens (human). [CR618615]	-0.213169	0.86264	8.19816	-8.23854	5.7e-05	0.000603326	1.90407
33237	5238	PGM3	phosphoglucomutase 3	Hs.661665	ENSG00000013375	A_24_P944723	gb|Homo sapiens cDNA FLJ11614 fis, clone HEMBA1004015. [AK021676]	-0.213127	0.862666	7.49932	-6.20023	0.000364204	0.00227665	-0.139728
42922	56977	STOX2	storkhead box 2	Hs.21958, Hs.696657	ENSG00000173320	A_23_P251364	ref|Homo sapiens storkhead box 2 (STOX2), mRNA [NM_020225]	-0.213082	0.862692	5.88758	-6.80584	0.000200971	0.00148052	0.515376
42298	283970	PDXDC2P	pyridoxal-dependent decarboxylase domain containing 2, pseudogene	Hs.513695	NA	A_24_P870101	gb|Homo sapiens cDNA: FLJ22556 fis, clone HSI01326. [AK026209]	-0.213028	0.862725	5.83793	-10.0651	1.46e-05	0.000244538	3.40657
10087	54704	PDP1	pyruvate dehyrogenase phosphatase catalytic subunit 1	Hs.22265	ENSG00000164951	A_23_P123336	ref|Homo sapiens protein phosphatase 2C, magnesium-dependent, catalytic subunit (PPM2C), nuclear gene encoding mitochondrial protein, mRNA [NM_018444]	-0.212811	0.862855	7.56201	-9.01144	3.11e-05	0.000401929	2.5723
18253	84276	NICN1	nicolin 1	Hs.191460	ENSG00000145029	A_23_P110005	ref|Homo sapiens nicolin 1 (NICN1), mRNA [NM_032316]	-0.212738	0.862898	8.37578	-10.0689	1.45e-05	0.000244279	3.40943
9234	200576	PIKFYVE	phosphoinositide kinase, FYVE finger containing	Hs.173939	ENSG00000115020	A_24_P943957	ref|Homo sapiens phosphatidylinositol-3-phosphate/phosphatidylinositol 5-kinase, type III (PIP5K3), transcript variant 2, mRNA [NM_015040]	-0.212509	0.863035	8.44745	-9.34523	2.43e-05	0.000343013	2.84561
19557	26873	OPLAH	5-oxoprolinase (ATP-hydrolysing)	Hs.305882	ENSG00000256366, ENSG00000178814	A_23_P170186	ref|Homo sapiens 5-oxoprolinase (ATP-hydrolysing) (OPLAH), mRNA [NM_017570]	-0.212318	0.863149	8.61018	-9.6697	1.92e-05	0.000293896	3.10312
26482	64760	FAM160B2	family with sequence similarity 160, member B2	Hs.491223	ENSG00000158863	A_23_P157620	ref|Homo sapiens family with sequence similarity 160, member B2 (FAM160B2), mRNA [NM_022749]	-0.212204	0.863218	9.53953	-9.10392	2.9e-05	0.000384979	2.6489
4	100132006	LOC100132006	hypothetical protein LOC100132006	Hs.593666	NA	A_24_P934473	gb|Homo sapiens cDNA FLJ35527 fis, clone SPLEN2001781. [AK092846]	-0.211992	0.863344	7.06201	-6.98149	0.000170399	0.00131031	0.697315
41027	91801	ALKBH8	alkB, alkylation repair homolog 8 (E. coli)	Hs.503763	ENSG00000137760	A_23_P371876	ref|Homo sapiens alkB, alkylation repair homolog 8 (E. coli) (ALKBH8), mRNA [NM_138775]	-0.211961	0.863363	6.79743	-7.95394	7.22e-05	0.000711471	1.64462
6115	124936	CYB5D2	cytochrome b5 domain containing 2	Hs.513871	ENSG00000167740	A_24_P228027	ref|Homo sapiens cytochrome b5 domain containing 2 (CYB5D2), transcript variant 1, mRNA [NM_144611]	-0.211928	0.863383	8.35489	-6.77229	0.000207481	0.00151517	0.480229
2784	79932	KIAA0319L	KIAA0319-like	Hs.456507	ENSG00000142687	A_23_P115534	ref|Homo sapiens KIAA0319-like (KIAA0319L), transcript variant 1, mRNA [NM_024874]	-0.211871	0.863417	6.96868	-6.72324	0.000217429	0.00156198	0.4286
40451	23626	SPO11	SPO11 meiotic protein covalently bound to DSB homolog (S. cerevisiae)	Hs.159737	ENSG00000054796	A_23_P166027	ref|Homo sapiens SPO11 meiotic protein covalently bound to DSB homolog (S. cerevisiae) (SPO11), transcript variant 1, mRNA [NM_012444]	-0.211711	0.863513	4.86501	-6.82298	0.000197732	0.00146362	0.533287
6872	23478	SEC11A	SEC11 homolog A (S. cerevisiae)	Hs.9534	ENSG00000140612	A_23_P380917	ref|Homo sapiens SEC11 homolog A (S. cerevisiae) (SEC11A), mRNA [NM_014300]	-0.2115	0.863639	12.836	-8.81131	3.62e-05	0.000444175	2.40414
26714	7593	MZF1	myeloid zinc finger 1	Hs.399810	ENSG00000099326	A_23_P130455	ref|Homo sapiens myeloid zinc finger 1 (MZF1), transcript variant 2, mRNA [NM_198055]	-0.21126	0.863782	9.72953	-9.75751	1.8e-05	0.000282478	3.17147
39413	5210	PFKFB4	6-phosphofructo-2-kinase/fructose-2,6-biphosphatase 4	Hs.476217	ENSG00000114268	A_24_P362904	ref|Homo sapiens 6-phosphofructo-2-kinase/fructose-2,6-biphosphatase 4 (PFKFB4), mRNA [NM_004567]	-0.210736	0.864096	7.76861	-7.53201	0.000103647	0.000911553	1.24559
41874	92283	ZNF461	zinc finger protein 461	Hs.590972	ENSG00000197808	A_23_P67424	ref|Homo sapiens zinc finger protein 461 (ZNF461), mRNA [NM_153257]	-0.210683	0.864128	6.48061	-8.88716	3.42e-05	0.000427257	2.46826
39538	9693	RAPGEF2	Rap guanine nucleotide exchange factor (GEF) 2	Hs.113912	ENSG00000109756	A_24_P935919	gb|Homo sapiens mRNA; cDNA DKFZp586O1422 (from clone DKFZp586O1422). [AL117397]	-0.210598	0.864179	5.1912	-4.53025	0.00237736	0.00930674	-2.19566
30089	3376	IARS	isoleucyl-tRNA synthetase	Hs.445403	ENSG00000196305	A_23_P258964	ref|Homo sapiens isoleucyl-tRNA synthetase (IARS), transcript variant long, mRNA [NM_013417]	-0.210479	0.86425	11.3113	-8.35284	5.2e-05	0.000564894	2.00618
30925	8881	CDC16	cell division cycle 16 homolog (S. cerevisiae)	Hs.374127	ENSG00000130177	A_23_P88083	ref|Homo sapiens cell division cycle 16 homolog (S. cerevisiae) (CDC16), transcript variant 1, mRNA [NM_003903]	-0.210344	0.864331	9.50864	-7.26871	0.000130985	0.00108097	0.987416
10853	84498	FAM120B	family with sequence similarity 120B	Hs.369522	ENSG00000112584	A_23_P313476	ref|Homo sapiens family with sequence similarity 120B (FAM120B), mRNA [NM_032448]	-0.210227	0.864401	8.44974	-9.27365	2.56e-05	0.0003542	2.78774
36365	55596	ZCCHC8	zinc finger, CCHC domain containing 8	Hs.37706, Hs.99298	ENSG00000033030	A_23_P64669	ref|Homo sapiens zinc finger, CCHC domain containing 8 (ZCCHC8), mRNA [NM_017612]	-0.210202	0.864416	9.40973	-9.96739	1.56e-05	0.00025574	3.33262
2360	147339	C18orf25	chromosome 18 open reading frame 25	Hs.116486	ENSG00000152242	A_23_P345361	ref|Homo sapiens chromosome 18 open reading frame 25 (C18orf25), transcript variant 1, mRNA [NM_145055]	-0.209944	0.864571	8.39155	-4.95268	0.00142687	0.00632067	-1.63873
22999	575	BAI1	brain-specific angiogenesis inhibitor 1	Hs.194654	ENSG00000181790	A_23_P125056	ref|Homo sapiens brain-specific angiogenesis inhibitor 1 (BAI1), mRNA [NM_001702]	-0.209261	0.86498	7.05693	-8.56379	4.39e-05	0.000504576	2.19155
40741	8100	IFT88	intraflagellar transport 88 homolog (Chlamydomonas)	Hs.187376	ENSG00000032742	A_23_P48339	ref|Homo sapiens intraflagellar transport 88 homolog (Chlamydomonas) (IFT88), transcript variant 1, mRNA [NM_175605]	-0.209237	0.864995	6.59956	-8.95513	3.25e-05	0.000412693	2.52532
26717	8681	JMJD7-PLA2G4B	JMJD7-PLA2G4B readthrough	Hs.198161	ENSG00000168970	A_23_P403424	ref|Homo sapiens JMJD7-PLA2G4B readthrough transcript (JMJD7-PLA2G4B), transcript variant 1, mRNA [NM_005090]	-0.209216	0.865007	9.90574	-8.88601	3.42e-05	0.000427319	2.4673
21612	7748	ZNF195	zinc finger protein 195	Hs.386294	ENSG00000005801	A_23_P252748	ref|Homo sapiens zinc finger protein 195 (ZNF195), transcript variant 3, mRNA [NM_007152]	-0.209169	0.865035	7.96385	-5.96977	0.000461758	0.00270665	-0.400937
7675	4644	MYO5A	myosin VA (heavy chain 12, myoxin)	Hs.21213, Hs.596221	ENSG00000197535	A_23_P117654	ref|Homo sapiens myosin VA (heavy chain 12, myoxin) (MYO5A), transcript variant 1, mRNA [NM_000259]	-0.209066	0.865097	6.76555	-6.93629	0.000177737	0.00134994	0.650828
21648	51310	SLC22A17	solute carrier family 22, member 17	Hs.373498	ENSG00000092096	A_24_P330385	ref|Homo sapiens solute carrier family 22, member 17 (SLC22A17), transcript variant 2, mRNA [NM_016609]	-0.208666	0.865337	7.54461	-9.97484	1.55e-05	0.000255099	3.33829
39365	378108	TRIM74	tripartite motif containing 74	Hs.645328	ENSG00000155428	A_24_P109375	ref|Homo sapiens tripartite motif-containing 74 (TRIM74), mRNA [NM_198853]	-0.208419	0.865485	6.6664	-7.05054	0.000159836	0.00125009	0.767888
1664	254896	LOC254896	hypothetical LOC254896	Hs.655801	NA	A_23_P409723	gb|Homo sapiens hypothetical protein MGC31957, mRNA (cDNA clone MGC:31957 IMAGE:3959651), complete cds. [BC021569]	-0.208225	0.865602	6.95384	-6.51124	0.000267006	0.00180992	0.202225
42696	121274	ZNF641	zinc finger protein 641	Hs.23492	ENSG00000167528	A_23_P64785	ref|Homo sapiens zinc finger protein 641 (ZNF641), mRNA [NM_152320]	-0.207992	0.865742	5.23539	-3.74309	0.00660361	0.0208137	-3.30072
12222	93129	ORAI3	ORAI calcium release-activated calcium modulator 3	Hs.729239	ENSG00000175938	A_23_P106898	ref|Homo sapiens ORAI calcium release-activated calcium modulator 3 (ORAI3), mRNA [NM_152288]	-0.207858	0.865822	8.5077	-8.95339	3.25e-05	0.000412878	2.52386
12996	100287590	LOC100287590	hypothetical protein LOC100287590	Hs.463010	NA	A_32_P85279	gb|full-length cDNA clone CS0DC013YG14 of Neuroblastoma Cot 25-normalized of Homo sapiens (human). [CR617560]	-0.207857	0.865823	6.95289	-9.3361	2.44e-05	0.000344572	2.83826
10907	55515	ACCN4	amiloride-sensitive cation channel 4, pituitary	Hs.87469	ENSG00000072182	A_24_P405375	ref|Homo sapiens amiloride-sensitive cation channel 4, pituitary (ACCN4), transcript variant 1, mRNA [NM_018674]	-0.207838	0.865834	6.20442	-7.56918	0.00010033	0.000893617	1.28146
29971	583	BBS2	Bardet-Biedl syndrome 2	Hs.333738	ENSG00000125124	A_23_P106835	ref|Homo sapiens Bardet-Biedl syndrome 2 (BBS2), mRNA [NM_031885]	-0.2074	0.866096	10.7206	-7.95924	7.19e-05	0.000709518	1.64952
23742	5033	P4HA1	prolyl 4-hydroxylase, alpha polypeptide I	Hs.500047, Hs.593005	ENSG00000122884	A_24_P406693	ref|Homo sapiens prolyl 4-hydroxylase, alpha polypeptide I (P4HA1), transcript variant 1, mRNA [NM_000917]	-0.20735	0.866127	8.87908	-7.54554	0.000102425	0.00090429	1.25867
27624	92162	TMEM88	transmembrane protein 88	Hs.389669	ENSG00000167874	A_23_P77859	ref|Homo sapiens transmembrane protein 88 (TMEM88), mRNA [NM_203411]	-0.20729	0.866163	6.83261	-8.55688	4.42e-05	0.000506477	2.18554
34656	51042	ZNF593	zinc finger protein 593	Hs.477273	ENSG00000142684	A_23_P34741	ref|Homo sapiens zinc finger protein 593 (ZNF593), mRNA [NM_015871]	-0.206497	0.866639	9.88773	-9.6756	1.91e-05	0.000293213	3.10773
42266	22872	SEC31A	SEC31 homolog A (S. cerevisiae)	Hs.370024	ENSG00000138674	A_23_P170273	ref|Homo sapiens SEC31 homolog A (S. cerevisiae) (SEC31A), transcript variant 5, mRNA [NM_001077207]	-0.206475	0.866652	8.31495	-6.92678	0.000179324	0.00135843	0.641023
21523	51195	RAPGEFL1	Rap guanine nucleotide exchange factor (GEF)-like 1	NA	ENSG00000108352	A_23_P152970	ref|Homo sapiens Rap guanine nucleotide exchange factor (GEF)-like 1 (RAPGEFL1), mRNA [NM_016339]	-0.206347	0.866729	6.67542	-7.79092	8.29e-05	0.000782237	1.49253
13318	1396	CRIP1	cysteine-rich protein 1 (intestinal)	Hs.70327	ENSG00000213145, ENSG00000257341	A_23_P44674	ref|Homo sapiens cysteine-rich protein 1 (intestinal) (CRIP1), mRNA [NM_001311]	-0.205944	0.866971	6.52612	-7.86053	7.81e-05	0.000749778	1.55779
8776	22938	SNW1	SNW domain containing 1	Hs.445498	ENSG00000100603	A_23_P37347	ref|Homo sapiens SNW domain containing 1 (SNW1), mRNA [NM_012245]	-0.205788	0.867065	9.85385	-9.85285	1.69e-05	0.000269623	3.24506
38917	7531	YWHAE	tyrosine 3-monooxygenase/tryptophan 5-monooxygenase activation protein, epsilon polypeptide	Hs.513851	ENSG00000108953	A_24_P33444	ref|Homo sapiens tyrosine 3-monooxygenase/tryptophan 5-monooxygenase activation protein, epsilon polypeptide (YWHAE), transcript variant 1, mRNA [NM_006761]	-0.205509	0.867232	5.7624	-8.44459	4.83e-05	0.000537114	2.08728
35762	9685	CLINT1	clathrin interactor 1	Hs.644000	ENSG00000113282	A_24_P12149	ref|Homo sapiens clathrin interactor 1 (CLINT1), mRNA [NM_014666]	-0.205443	0.867272	8.83235	-7.50889	0.000105771	0.000924611	1.22321
9806	3768	KCNJ12	potassium inwardly-rectifying channel, subfamily J, member 12	Hs.200629	ENSG00000237600, ENSG00000184185	A_23_P129821	ref|Homo sapiens potassium inwardly-rectifying channel, subfamily J, member 12 (KCNJ12), mRNA [NM_021012]	-0.205353	0.867326	6.71345	-8.11311	6.32e-05	0.0006477	1.79066
27374	4126	MANBA	mannosidase, beta A, lysosomal	Hs.480415	ENSG00000109323	A_23_P258698	ref|Homo sapiens mannosidase, beta A, lysosomal (MANBA), mRNA [NM_005908]	-0.205305	0.867355	8.75829	-7.16713	0.000143622	0.00115644	0.885844
22550	80761	UPK3B	uroplakin 3B	Hs.488861	ENSG00000243566	A_24_P112160	ref|Homo sapiens uroplakin 3B (UPK3B), transcript variant 1, mRNA [NM_030570]	-0.205189	0.867425	7.17361	-9.70137	1.88e-05	0.000290155	3.12783
29998	113177	IZUMO4	IZUMO family member 4	Hs.424049	ENSG00000099840	A_23_P50674	ref|Homo sapiens chromosome 19 open reading frame 36 (C19orf36), transcript variant 1, mRNA [NM_001031735]	-0.204876	0.867613	5.76545	-4.16973	0.00375248	0.0133372	-2.69118
37455	653319	KIAA0895L	KIAA0895-like	Hs.651201	ENSG00000196123	A_24_P922062	gb|Homo sapiens cDNA FLJ34984 fis, clone OCBBF2001639. [AK092303]	-0.20449	0.867845	5.87784	-4.74083	0.00183725	0.00766127	-1.91481
25194	7461	CLIP2	CAP-GLY domain containing linker protein 2	Hs.647018	ENSG00000106665	A_23_P215479	ref|Homo sapiens CAP-GLY domain containing linker protein 2 (CLIP2), transcript variant 1, mRNA [NM_003388]	-0.204357	0.867925	8.87834	-6.69521	0.000223353	0.0015932	0.398972
31147	160313	KRT19P2	keratin 19 pseudogene 2	Hs.527883	NA	A_23_P353865	gb|Homo sapiens mRNA for keratin 19, partial cds, isolate:K19-141. [AB041269]	-0.204085	0.868089	5.43124	-6.38526	0.000302382	0.00198189	0.0651425
24616	199800	C19orf76	chromosome 19 open reading frame 76	Hs.311193, Hs.607562	ENSG00000224420	A_23_P27688	ref|Homo sapiens hypothetical protein LOC199800 (LOC199800), mRNA [NM_001101340]	-0.203979	0.868153	7.18783	-5.34552	0.00090794	0.00449935	-1.1437
8873	37	ACADVL	acyl-CoA dehydrogenase, very long chain	Hs.437178	ENSG00000072778	A_23_P207650	ref|Homo sapiens acyl-Coenzyme A dehydrogenase, very long chain (ACADVL), nuclear gene encoding mitochondrial protein, transcript variant 1, mRNA [NM_000018]	-0.203963	0.868162	13.0715	-7.86542	7.78e-05	0.000747627	1.56236
38703	30837	SOCS7	suppressor of cytokine signaling 7	Hs.514132	ENSG00000255751, ENSG00000174111	A_24_P367211	ref|Homo sapiens suppressor of cytokine signaling 7 (SOCS7), mRNA [NM_014598]	-0.203939	0.868177	6.47794	-9.48587	2.19e-05	0.000321293	2.9582
17120	11127	KIF3A	kinesin family member 3A	Hs.43670	ENSG00000131437	A_23_P122027	ref|Homo sapiens kinesin family member 3A (KIF3A), mRNA [NM_007054]	-0.203929	0.868183	9.09693	-8.18953	5.94e-05	0.000619966	1.85993
34276	730051	ZNF814	zinc finger protein 814	Hs.634143	ENSG00000204514	A_24_P582763	gb|Homo sapiens cDNA FLJ39082 fis, clone NT2RP7018586. [AK096401]	-0.203883	0.868211	6.04237	-9.25577	2.59e-05	0.000357311	2.77322
7443	55786	ZNF415	zinc finger protein 415	Hs.147765	ENSG00000170954	A_23_P89871	ref|Homo sapiens zinc finger protein 415 (ZNF415), transcript variant 2, mRNA [NM_018355]	-0.203772	0.868278	5.41337	-7.75112	8.57e-05	0.000800601	1.45501
18602	84105	PCBD2	pterin-4 alpha-carbinolamine dehydratase/dimerization cofactor of hepatocyte nuclear factor 1 alpha (TCF1) 2	Hs.710014	ENSG00000132570	A_24_P180423	gb|Homo sapiens cDNA FLJ25629 fis, clone STM03715. [AK098495]	-0.203716	0.868311	6.12127	-4.20651	0.00357858	0.0128518	-2.63978
36448	23564	DDAH2	dimethylarginine dimethylaminohydrolase 2	Hs.247362	ENSG00000213722, ENSG00000206395, ENSG00000226634, ENSG00000225635, ENSG00000233076, ENSG00000227317, ENSG00000228128	A_23_P19482	ref|Homo sapiens dimethylarginine dimethylaminohydrolase 2 (DDAH2), mRNA [NM_013974]	-0.20349	0.868447	9.8082	-6.2952	0.000330876	0.00212089	-0.0340463
22011	145553	MDP1	magnesium-dependent phosphatase 1	Hs.220963	ENSG00000213920	A_23_P99811	ref|Homo sapiens magnesium-dependent phosphatase 1 (MDP-1), mRNA [NM_138476]	-0.203487	0.868449	8.37452	-6.59908	0.000245078	0.0017047	0.296663
3706	284013	VMO1	vitelline membrane outer layer 1 homolog (chicken)	Hs.122561	ENSG00000182853	A_23_P55356	ref|Homo sapiens vitelline membrane outer layer 1 homolog (chicken) (VMO1), mRNA [NM_182566]	-0.203434	0.868481	7.53834	-8.77024	3.74e-05	0.000453358	2.36923
24467	25961	NUDT13	nudix (nucleoside diphosphate linked moiety X)-type motif 13	Hs.533657	ENSG00000166321	A_32_P41471	ref|Homo sapiens nudix (nucleoside diphosphate linked moiety X)-type motif 13 (NUDT13), mRNA [NM_015901]	-0.203146	0.868654	7.59568	-8.72453	3.87e-05	0.000463752	2.3302
3964	23008	KLHDC10	kelch domain containing 10	Hs.520710	ENSG00000128607	A_24_P299429	gb|Homo sapiens mRNA for KIAA0265 gene, partial cds. [D87454]	-0.202968	0.868762	6.01993	-8.99529	3.15e-05	0.000404978	2.55885
2594	10799	RPP40	ribonuclease P/MRP 40kDa subunit	Hs.511756	ENSG00000124787	A_23_P111297	ref|Homo sapiens ribonuclease P/MRP 40kDa subunit (RPP40), mRNA [NM_006638]	-0.202966	0.868763	7.95162	-8.75007	3.8e-05	0.000457503	2.35203
27393	9737	GPRASP1	G protein-coupled receptor associated sorting protein 1	Hs.729265	ENSG00000198932	A_23_P96590	ref|Homo sapiens G protein-coupled receptor associated sorting protein 1 (GPRASP1), transcript variant 1, mRNA [NM_014710]	-0.202856	0.868829	6.61744	-9.38866	2.35e-05	0.000335504	2.88054
33859	5608	MAP2K6	mitogen-activated protein kinase kinase 6	Hs.463978	ENSG00000108984	A_23_P207445	ref|Homo sapiens mitogen-activated protein kinase kinase 6 (MAP2K6), mRNA [NM_002758]	-0.202561	0.869006	6.29687	-4.47455	0.00254785	0.00981489	-2.27101
30844	5098	PCDHGC3	protocadherin gamma subfamily C, 3	Hs.368160	ENSG00000253767, ENSG00000253873, ENSG00000240184	A_23_P218937	ref|Homo sapiens protocadherin gamma subfamily C, 3 (PCDHGC3), transcript variant 2, mRNA [NM_032402]	-0.202525	0.869028	7.41392	-9.73477	1.83e-05	0.000285405	3.15382
41340	23498	HAAO	3-hydroxyanthranilate 3,4-dioxygenase	Hs.368805	ENSG00000162882	A_23_P28697	ref|Homo sapiens 3-hydroxyanthranilate 3,4-dioxygenase (HAAO), mRNA [NM_012205]	-0.202472	0.86906	5.22363	-3.03251	0.0179323	0.0453254	-4.36268
20534	120376	C11orf93	chromosome 11 open reading frame 93	Hs.31409	ENSG00000214290	A_23_P116173	ref|Homo sapiens Uncharacterized protein LOC120376 (LOC120376), mRNA [NM_001136105]	-0.202287	0.869172	5.12888	-8.56034	4.41e-05	0.000505365	2.18854
29462	10043	TOM1	target of myb1 (chicken)	Hs.474705	ENSG00000100284	A_23_P103084	ref|Homo sapiens target of myb1 (chicken) (TOM1), transcript variant 1, mRNA [NM_005488]	-0.202192	0.869229	7.48389	-6.75262	0.000211407	0.00153627	0.459562
39280	388969	C2orf68	chromosome 2 open reading frame 68	Hs.516159	ENSG00000168887	A_24_P289376	ref|Homo sapiens chromosome 2 open reading frame 68 (C2orf68), mRNA [NM_001013649]	-0.202078	0.869298	8.94292	-6.9251	0.000179607	0.00135986	0.639287
3441	84519	ACRBP	acrosin binding protein	Hs.123239	ENSG00000111644	A_23_P151120	ref|Homo sapiens acrosin binding protein (ACRBP), mRNA [NM_032489]	-0.201983	0.869355	5.49466	-7.26705	0.000131181	0.00108177	0.985762
27472	80336	PABPC1L	poly(A) binding protein, cytoplasmic 1-like	Hs.641481	ENSG00000101104	A_23_P309599	gb|Homo sapiens cDNA: FLJ23107 fis, clone LNG07738. [AK026760]	-0.201968	0.869364	6.45923	-5.65754	0.000643531	0.00347532	-0.765874
40450	100505622	LOC100505622	hypothetical LOC100505622	Hs.661761	NA	A_24_P459739	gb|Homo sapiens, clone IMAGE:4852110, mRNA. [BC015776]	-0.20194	0.86938	4.93513	-4.09519	0.00413385	0.0144064	-2.79591
25827	4122	MAN2A2	mannosidase, alpha, class 2A, member 2	Hs.116459	ENSG00000196547	A_24_P381838	ref|Homo sapiens mannosidase, alpha, class 2A, member 2 (MAN2A2), mRNA [NM_006122]	-0.201874	0.869421	9.49491	-8.37175	5.12e-05	0.000559648	2.02295
26948	55572	FOXRED1	FAD-dependent oxidoreductase domain containing 1	Hs.317190	ENSG00000110074	A_23_P35883	ref|Homo sapiens FAD-dependent oxidoreductase domain containing 1 (FOXRED1), mRNA [NM_017547]	-0.201702	0.869524	9.80558	-9.72599	1.84e-05	0.000286668	3.147
17057	253461	ZBTB38	zinc finger and BTB domain containing 38	NA	ENSG00000177311	A_23_P380076	ref|Homo sapiens zinc finger and BTB domain containing 38 (ZBTB38), mRNA [NM_001080412]	-0.201542	0.86962	9.08703	-4.07124	0.00426521	0.0147472	-2.82973
955	23468	CBX5	chromobox homolog 5	Hs.349283	ENSG00000094916	A_24_P664995	ref|Homo sapiens chromobox homolog 5 (HP1 alpha homolog, Drosophila) (CBX5), transcript variant 1, mRNA [NM_001127322]	-0.201469	0.869664	7.56572	-7.32752	0.000124241	0.00104177	1.04571
6150	28976	ACAD9	acyl-CoA dehydrogenase family, member 9	Hs.567482	ENSG00000177646	A_24_P191656	ref|Homo sapiens acyl-Coenzyme A dehydrogenase family, member 9 (ACAD9), mRNA [NM_014049]	-0.20142	0.869694	9.01194	-6.64329	0.000234805	0.00164964	0.343858
8213	84282	RNF135	ring finger protein 135	Hs.29874	ENSG00000181481	A_23_P252283	ref|Homo sapiens ring finger protein 135 (RNF135), transcript variant 1, mRNA [NM_032322]	-0.201416	0.869696	8.60951	-4.64563	0.00206263	0.00837329	-2.04099
27650	91775	FAM55C	family with sequence similarity 55, member C	Hs.595933	ENSG00000144815	A_23_P132560	ref|Homo sapiens family with sequence similarity 55, member C (FAM55C), transcript variant 2, mRNA [NM_145037]	-0.201392	0.869711	5.60629	-6.67025	0.000228779	0.00162017	0.372512
22903	25998	IBTK	inhibitor of Bruton agammaglobulinemia tyrosine kinase	Hs.306425	ENSG00000005700	A_24_P929724	ref|Homo sapiens inhibitor of Bruton agammaglobulinemia tyrosine kinase (IBTK), mRNA [NM_015525]	-0.201317	0.869756	9.2622	-9.07083	2.97e-05	0.000390895	2.62157
1491	63908	NAPB	N-ethylmaleimide-sensitive factor attachment protein, beta	Hs.269471	ENSG00000125814	A_23_P109193	ref|Homo sapiens N-ethylmaleimide-sensitive factor attachment protein, beta (NAPB), mRNA [NM_022080]	-0.201278	0.869779	7.31308	-9.45703	2.24e-05	0.000325106	2.93523
29982	55764	IFT122	intraflagellar transport 122 homolog (Chlamydomonas)	Hs.655284	ENSG00000163913	A_23_P212447	ref|Homo sapiens intraflagellar transport 122 homolog (Chlamydomonas) (IFT122), transcript variant 3, mRNA [NM_018262]	-0.201071	0.869905	9.18946	-6.96261	0.000173422	0.001327	0.677926
24810	84693	MCEE	methylmalonyl CoA epimerase	Hs.94949	ENSG00000124370	A_23_P56654	ref|Homo sapiens methylmalonyl CoA epimerase (MCEE), mRNA [NM_032601]	-0.200864	0.870029	8.87365	-9.59348	2.03e-05	0.000304426	3.04333
32987	11232	POLG2	polymerase (DNA directed), gamma 2, accessory subunit	Hs.437009	ENSG00000255574, ENSG00000256525	A_23_P26905	ref|Homo sapiens polymerase (DNA directed), gamma 2, accessory subunit (POLG2), mRNA [NM_007215]	-0.200769	0.870087	10.0007	-9.29949	2.51e-05	0.000351187	2.80867
32193	752014	CEMP1	cementum protein 1	Hs.433499	ENSG00000205923	A_24_P287785	gb|Homo sapiens mRNA; cDNA DKFZp313E2215 (from clone DKFZp313E2215). [AL833099]	-0.200633	0.870169	10.117	-8.63444	4.16e-05	0.000487413	2.25276
38153	7108	TM7SF2	transmembrane 7 superfamily member 2	Hs.31130	ENSG00000149809	A_23_P116037	ref|Homo sapiens transmembrane 7 superfamily member 2 (TM7SF2), mRNA [NM_003273]	-0.20063	0.87017	8.85468	-7.55106	0.000101932	0.000901587	1.26399
30546	4548	MTR	5-methyltetrahydrofolate-homocysteine methyltransferase	Hs.498187	ENSG00000116984	A_23_P200936	ref|Homo sapiens 5-methyltetrahydrofolate-homocysteine methyltransferase (MTR), mRNA [NM_000254]	-0.200441	0.870284	6.55294	-5.34606	0.00090738	0.0044976	-1.14303
10745	1182	CLCN3	chloride channel 3	Hs.481186	ENSG00000109572	A_24_P402847	ref|Homo sapiens chloride channel 3 (CLCN3), transcript variant b, mRNA [NM_001829]	-0.200294	0.870373	7.56191	-9.14532	2.81e-05	0.00037765	2.68298
29893	29104	N6AMT1	N-6 adenine-specific DNA methyltransferase 1 (putative)	Hs.163846	ENSG00000156239	A_23_P80086	ref|Homo sapiens N-6 adenine-specific DNA methyltransferase 1 (putative) (N6AMT1), transcript variant 1, mRNA [NM_013240]	-0.199978	0.870564	8.25311	-6.29917	0.000329556	0.00211524	-0.0296443
10272	10657	KHDRBS1	KH domain containing, RNA binding, signal transduction associated 1	Hs.445893	ENSG00000121774	A_23_P200386	ref|Homo sapiens KH domain containing, RNA binding, signal transduction associated 1 (KHDRBS1), mRNA [NM_006559]	-0.19967	0.870749	12.3022	-8.61927	4.21e-05	0.000491607	2.23965
23461	90427	BMF	Bcl2 modifying factor	Hs.591104	ENSG00000104081	A_23_P379649	ref|Homo sapiens Bcl2 modifying factor (BMF), transcript variant 1, mRNA [NM_001003940]	-0.199443	0.870887	6.31984	-5.94878	0.000471999	0.00274905	-0.425069
26551	22921	MSRB2	methionine sulfoxide reductase B2	Hs.461420	ENSG00000148450	A_23_P97932	ref|Homo sapiens methionine sulfoxide reductase B2 (MSRB2), mRNA [NM_012228]	-0.198932	0.871195	11.0437	-7.72782	8.75e-05	0.000811318	1.43297
24233	114785	MBD6	methyl-CpG binding domain protein 6	Hs.524523	ENSG00000166987	A_32_P411592	ref|Homo sapiens methyl-CpG binding domain protein 6 (MBD6), mRNA [NM_052897]	-0.198642	0.871371	6.67412	-8.11436	6.32e-05	0.000647339	1.7918
31895	816	CAMK2B	calcium/calmodulin-dependent protein kinase II beta	Hs.351887	ENSG00000058404	A_23_P42882	ref|Homo sapiens calcium/calmodulin-dependent protein kinase II beta (CAMK2B), transcript variant 6, mRNA [NM_172082]	-0.198545	0.871429	7.00068	-5.21833	0.0010486	0.00500262	-1.30158
29287	85367	KIAA1652	KIAA1652 protein	Hs.729276	NA	A_24_P247920	gb|Homo sapiens mRNA for KIAA1652 protein, partial cds. [AB051439]	-0.198089	0.871704	7.3824	-7.95563	7.21e-05	0.000711179	1.64619
42907	55679	LIMS2	LIM and senescent cell antigen-like domains 2	Hs.469881	ENSG00000072163	A_23_P142796	ref|Homo sapiens LIM and senescent cell antigen-like domains 2 (LIMS2), transcript variant 2, mRNA [NM_017980]	-0.198054	0.871726	8.35235	-6.18989	0.000368051	0.00229475	-0.151299
10422	123016	TTC8	tetratricopeptide repeat domain 8	Hs.303055	ENSG00000165533	A_32_P169735	ref|Homo sapiens tetratricopeptide repeat domain 8 (TTC8), transcript variant 1, mRNA [NM_144596]	-0.198024	0.871743	8.61564	-8.85824	3.49e-05	0.000432837	2.44387
16321	56850	GRIPAP1	GRIP1 associated protein 1	Hs.109929	ENSG00000068400	A_24_P45251	ref|Homo sapiens GRIP1 associated protein 1 (GRIPAP1), transcript variant 1, mRNA [NM_020137]	-0.198012	0.871751	9.43995	-7.24298	0.000134064	0.00109782	0.961793
728	7419	VDAC3	voltage-dependent anion channel 3	Hs.699301	ENSG00000078668	A_23_P60069	ref|Homo sapiens voltage-dependent anion channel 3 (VDAC3), transcript variant 2, mRNA [NM_005662]	-0.197875	0.871834	11.2495	-8.56095	4.4e-05	0.000505253	2.18908
1021	55000	TUG1	taurine upregulated 1 (non-protein coding)	Hs.554829	NA	A_24_P382724	ref|Homo sapiens taurine upregulated 1 (non-protein coding) (TUG1), non-coding RNA [NR_002323]	-0.197644	0.871973	9.36972	-7.00741	0.000166346	0.00128838	0.723864
15055	25917	THUMPD3	THUMP domain containing 3	Hs.443081	ENSG00000134077	A_23_P212213	ref|Homo sapiens THUMP domain containing 3 (THUMPD3), transcript variant 1, mRNA [NM_015453]	-0.197635	0.871979	8.07878	-7.38648	0.000117867	0.00100091	1.10379
5184	1340	COX6B1	cytochrome c oxidase subunit VIb polypeptide 1 (ubiquitous)	Hs.431668	ENSG00000126267	A_23_P108244	ref|Homo sapiens cytochrome c oxidase subunit Vib polypeptide 1 (ubiquitous) (COX6B1), mRNA [NM_001863]	-0.19753	0.872042	12.3277	-9.28581	2.53e-05	0.000352401	2.7976
11069	2261	FGFR3	fibroblast growth factor receptor 3	Hs.1420	ENSG00000068078	A_23_P212830	ref|Homo sapiens fibroblast growth factor receptor 3 (FGFR3), transcript variant 1, mRNA [NM_000142]	-0.197478	0.872074	6.34267	-5.07021	0.00124357	0.00569779	-1.48832
19054	23360	FNBP4	formin binding protein 4	Hs.6834	ENSG00000109920	A_23_P395595	ref|Homo sapiens formin binding protein 4 (FNBP4), mRNA [NM_015308]	-0.197474	0.872076	10.0785	-7.1109	0.0001512	0.00120118	0.829136
16201	255394	TCP11L2	t-complex 11 (mouse)-like 2	Hs.696047	ENSG00000166046	A_23_P419107	ref|Homo sapiens t-complex 11 (mouse)-like 2 (TCP11L2), mRNA [NM_152772]	-0.197399	0.872121	6.57759	-9.15688	2.79e-05	0.000375337	2.69247
7438	201501	ZBTB7C	zinc finger and BTB domain containing 7C	Hs.515388	ENSG00000184828	A_23_P345973	ref|Homo sapiens zinc finger and BTB domain containing 7C (ZBTB7C), mRNA [NM_001039360]	-0.197394	0.872124	6.85604	-9.06352	2.99e-05	0.000391701	2.61553
42213	951	CD37	CD37 molecule	Hs.166556	ENSG00000104894	A_24_P82749	ref|Homo sapiens CD37 molecule (CD37), transcript variant 1, mRNA [NM_001774]	-0.197345	0.872154	5.00547	-5.25746	0.00100292	0.00483952	-1.25277
34241	56950	SMYD2	SET and MYND domain containing 2	Hs.66170	ENSG00000143499	A_23_P170587	ref|Homo sapiens SET and MYND domain containing 2 (SMYD2), mRNA [NM_020197]	-0.197267	0.872202	9.37398	-6.33913	0.000316618	0.00205409	0.0144664
30104	4599	MX1	myxovirus (influenza virus) resistance 1, interferon-inducible protein p78 (mouse)	Hs.517307	ENSG00000157601	A_23_P17663	ref|Homo sapiens myxovirus (influenza virus) resistance 1, interferon-inducible protein p78 (mouse) (MX1), mRNA [NM_002462]	-0.197139	0.872279	6.09116	-5.52008	0.000747717	0.00388791	-0.93067
14492	994	CDC25B	cell division cycle 25 homolog B (S. pombe)	Hs.153752	ENSG00000101224	A_23_P210726	ref|Homo sapiens cell division cycle 25 homolog B (S. pombe) (CDC25B), transcript variant 1, mRNA [NM_021873]	-0.197089	0.872309	10.6135	-8.40159	5e-05	0.000550277	2.04936
27734	54970	TTC12	tetratricopeptide repeat domain 12	Hs.288772	ENSG00000149292	A_24_P73075	ref|Homo sapiens tetratricopeptide repeat domain 12 (TTC12), mRNA [NM_017868]	-0.196951	0.872392	8.78057	-4.71314	0.00189989	0.00786652	-1.95139
23455	100233156	LOC100233156	tektin 4 pseudogene	Hs.595418	NA	A_32_P32496	gb|Homo sapiens cDNA FLJ44253 fis, clone TKIDN2009092. [AK126241]	-0.196903	0.872421	7.28192	-8.87291	3.46e-05	0.000429962	2.45625
22959	284004	HEXDC	hexosaminidase (glycosyl hydrolase family 20, catalytic domain) containing	Hs.444743	ENSG00000169660	A_23_P300174	ref|Homo sapiens hexosaminidase (glycosyl hydrolase family 20, catalytic domain) containing (HEXDC), mRNA [NM_173620]	-0.196796	0.872486	7.07312	-6.26961	0.000339508	0.00215994	-0.0624084
2880	5650	KLK7	kallikrein-related peptidase 7	Hs.151254	ENSG00000169035	A_23_P39056	ref|Homo sapiens kallikrein-related peptidase 7 (KLK7), transcript variant 1, mRNA [NM_005046]	-0.196744	0.872517	6.0022	-7.50352	0.000106272	0.00092768	1.21801
25008	1394	CRHR1	corticotropin releasing hormone receptor 1	Hs.417628	ENSG00000257793, ENSG00000120088	A_23_P414884	ref|Homo sapiens corticotropin releasing hormone receptor 1 (CRHR1), mRNA [NM_004382]	-0.19652	0.872653	7.6786	-7.43154	0.000113243	0.000969011	1.14793
540	100128398	LOC100128398	hypothetical LOC100128398	Hs.655081	NA	A_24_P135427	gb|Homo sapiens cDNA FLJ37429 fis, clone BRAWH2001666. [AK094748]	-0.196491	0.87267	6.15215	-7.41466	0.000114951	0.000980554	1.13142
29252	57167	SALL4	sal-like 4 (Drosophila)	Hs.517113	ENSG00000101115	A_23_P109072	ref|Homo sapiens sal-like 4 (Drosophila) (SALL4), mRNA [NM_020436]	-0.196456	0.872692	6.78881	-6.11972	0.0003954	0.00241425	-0.230205
37885	5308	PITX2	paired-like homeodomain 2	Hs.643588	ENSG00000164093	A_23_P167367	ref|Homo sapiens paired-like homeodomain 2 (PITX2), transcript variant 2, mRNA [NM_153426]	-0.196224	0.872832	4.99922	-4.20625	0.00357981	0.0128552	-2.64016
30731	57447	NDRG2	NDRG family member 2	Hs.525205	ENSG00000165795	A_23_P37205	ref|Homo sapiens NDRG family member 2 (NDRG2), transcript variant 1, mRNA [NM_201535]	-0.196143	0.872881	9.23949	-9.20303	2.69e-05	0.000366879	2.73024
30978	54662	TBC1D13	TBC1 domain family, member 13	Hs.3376	ENSG00000107021	A_23_P94660	ref|Homo sapiens TBC1 domain family, member 13 (TBC1D13), mRNA [NM_018201]	-0.196027	0.872951	10.2349	-8.64172	4.13e-05	0.000485858	2.25905
24904	29992	PILRA	paired immunoglobin-like type 2 receptor alpha	Hs.444407	ENSG00000085514	A_23_P31224	ref|Homo sapiens paired immunoglobin-like type 2 receptor alpha (PILRA), transcript variant 3, mRNA [NM_178273]	-0.195831	0.87307	8.87333	-4.79783	0.00171537	0.00728132	-1.8399
42556	143503	OR51E1	olfactory receptor, family 51, subfamily E, member 1	Hs.470038	ENSG00000180785	A_23_P13493	ref|Homo sapiens olfactory receptor, family 51, subfamily E, member 1 (OR51E1), mRNA [NM_152430]	-0.195613	0.873202	4.90917	-4.11232	0.00404262	0.0141436	-2.77178
12254	5922	RASA2	RAS p21 protein activator 2	Hs.655941	ENSG00000155903	A_23_P80566	ref|Homo sapiens RAS p21 protein activator 2 (RASA2), mRNA [NM_006506]	-0.19552	0.873258	7.40995	-4.80569	0.00169926	0.0072283	-1.8296
39677	253512	SLC25A30	solute carrier family 25, member 30	Hs.591230	ENSG00000174032	A_23_P159284	ref|Homo sapiens solute carrier family 25, member 30 (SLC25A30), mRNA [NM_001010875]	-0.19518	0.873464	5.47445	-5.77423	0.000567638	0.00314938	-0.627969
3237	285352	FLJ39534	hypothetical FLJ39534	Hs.570631	NA	A_32_P70361	gb|Homo sapiens cDNA FLJ39534 fis, clone PUAEN2005247. [AK096853]	-0.195128	0.873495	6.19506	-6.89607	0.000184564	0.00138794	0.609272
34392	9415	FADS2	fatty acid desaturase 2	Hs.502745	ENSG00000134824	A_23_P98580	ref|Homo sapiens fatty acid desaturase 2 (FADS2), mRNA [NM_004265]	-0.195056	0.873539	10.3776	-8.40705	4.98e-05	0.000548272	2.05419
20331	147798	TMC4	transmembrane channel-like 4	Hs.355126	ENSG00000167608	A_23_P330461	ref|Homo sapiens transmembrane channel-like 4 (TMC4), mRNA [NM_144686]	-0.195048	0.873544	5.5579	-5.90468	0.000494347	0.00284387	-0.475957
32209	100128343	LOC100128343	hypothetical LOC100128343	Hs.675262	NA	A_24_P401432	gb|Homo sapiens clone pp9378 unknown mRNA. [AF289611]	-0.194903	0.873631	6.75934	-6.79545	0.000202961	0.00149012	0.504508
40864	1611	DAP	death-associated protein	Hs.75189	ENSG00000112977	A_24_P243278	ref|Homo sapiens death-associated protein (DAP), mRNA [NM_004394]	-0.194766	0.873715	7.15636	-5.95303	0.000469906	0.00274218	-0.42018
17473	22884	WDR37	WD repeat domain 37	Hs.188495	ENSG00000047056	A_23_P47073	ref|Homo sapiens WD repeat domain 37 (WDR37), mRNA [NM_014023]	-0.194672	0.873772	9.41066	-5.98988	0.000452179	0.00266093	-0.377873
42978	80352	RNF39	ring finger protein 39	Hs.121178	ENSG00000236967, ENSG00000204618, ENSG00000237733, ENSG00000230467, ENSG00000227171, ENSG00000230332, ENSG00000235022, ENSG00000206500	A_24_P314931	ref|Homo sapiens ring finger protein 39 (RNF39), transcript variant 1, mRNA [NM_025236]	-0.194467	0.873896	4.94857	-2.84718	0.0235129	0.0560536	-4.64612
16245	100130950	LOC100130950	hypothetical LOC100130950	Hs.668646	NA	A_24_P400832	gb|Homo sapiens cDNA clone IMAGE:5269150. [BC029580]	-0.194182	0.874069	8.17071	-9.10761	2.89e-05	0.000384052	2.65195
10486	126823	KLHDC9	kelch domain containing 9	Hs.507290	ENSG00000162755	A_23_P86100	ref|Homo sapiens kelch domain containing 9 (KLHDC9), transcript variant 2, mRNA [NM_001007255]	-0.193957	0.874205	8.26599	-8.25559	5.63e-05	0.000597918	1.91939
37312	978	CDA	cytidine deaminase	Hs.466910	ENSG00000158825	A_23_P34597	ref|Homo sapiens cytidine deaminase (CDA), mRNA [NM_001785]	-0.193899	0.87424	6.62979	-9.24401	2.61e-05	0.00035899	2.76366
35619	285097	FLJ38379	hypothetical FLJ38379	Hs.653239	NA	A_24_P194661	gb|Homo sapiens cDNA FLJ38379 fis, clone FEBRA2002986. [AK095698]	-0.193863	0.874262	5.74532	-4.69824	0.00193455	0.00797196	-1.9711
33785	201973	CCDC111	coiled-coil domain containing 111	Hs.481307	ENSG00000164306	A_23_P358470	ref|Homo sapiens coiled-coil domain containing 111 (CCDC111), mRNA [NM_152683]	-0.193585	0.87443	7.19658	-5.75016	0.000582441	0.00320894	-0.656268
35964	55252	ASXL2	additional sex combs like 2 (Drosophila)	Hs.119815	ENSG00000143970	A_23_P210300	ref|Homo sapiens additional sex combs like 2 (Drosophila) (ASXL2), mRNA [NM_018263]	-0.193181	0.874675	9.87487	-5.99804	0.000448354	0.00264452	-0.368526
4542	29924	EPN1	epsin 1	Hs.279953	ENSG00000063245	A_23_P384072	ref|Homo sapiens epsin 1 (EPN1), transcript variant 3, mRNA [NM_013333]	-0.193059	0.874749	6.46811	-9.05508	3.01e-05	0.000392538	2.60854
28180	27040	LAT	linker for activation of T cells	Hs.632179	ENSG00000213658	A_23_P60977	ref|Homo sapiens linker for activation of T cells (LAT), transcript variant 1, mRNA [NM_014387]	-0.193032	0.874765	6.38066	-8.23153	5.74e-05	0.000605747	1.89778
31735	8859	STK19	serine/threonine kinase 19	Hs.654371	ENSG00000204344, ENSG00000234947, ENSG00000226257, ENSG00000206342, ENSG00000236250, ENSG00000226033	A_23_P19479	ref|Homo sapiens serine/threonine kinase 19 (STK19), transcript variant 2, mRNA [NM_032454]	-0.193023	0.874771	8.48407	-8.7376	3.84e-05	0.000460337	2.34138
29652	221272	LOC221272	hypothetical LOC221272	Hs.586272	NA	A_32_P88764	gb|Homo sapiens cDNA: FLJ21659 fis, clone COL08743. [AK025312]	-0.1928	0.874906	6.26421	-8.38661	5.06e-05	0.0005544	2.03611
26348	84618	NT5C1A	5'-nucleotidase, cytosolic IA	Hs.307006	ENSG00000116981	A_24_P113960	ref|Homo sapiens 5'-nucleotidase, cytosolic IA (NT5C1A), mRNA [NM_032526]	-0.192517	0.875078	6.64344	-8.74007	3.83e-05	0.000459838	2.34349
15795	768096	HAR1A	highly accelerated region 1A (non-protein coding)	Hs.549606	NA	A_32_P226498	ref|Homo sapiens highly accelerated region 1A (non-protein coding) (HAR1A), non-coding RNA [NR_003244]	-0.192427	0.875133	6.85788	-8.51342	4.57e-05	0.000518447	2.14764
20409	728175	LOC728175	hypothetical LOC728175	Hs.590107	NA	A_23_P379111	gb|Homo sapiens hypothetical protein MGC24125, mRNA (cDNA clone IMAGE:4687544), complete cds. [BC020886]	-0.192397	0.875151	6.4838	-4.49465	0.00248481	0.00962827	-2.24376
16238	4490	MT1B	metallothionein 1B	Hs.656629	ENSG00000169688	A_23_P37983	ref|Homo sapiens metallothionein 1B (MT1B), mRNA [NM_005947]	-0.192339	0.875186	13.621	-8.83685	3.55e-05	0.000438128	2.42579
13478	22949	PTGR1	prostaglandin reductase 1	Hs.584864	ENSG00000106853	A_23_P157809	ref|Homo sapiens prostaglandin reductase 1 (PTGR1), mRNA [NM_012212]	-0.19233	0.875191	10.3525	-7.94167	7.29e-05	0.000716338	1.63326
15871	80063	ATF7IP2	activating transcription factor 7 interacting protein 2	Hs.513343	ENSG00000166669	A_24_P341987	ref|Homo sapiens activating transcription factor 7 interacting protein 2 (ATF7IP2), mRNA [NM_024997]	-0.192328	0.875192	6.18848	-8.91398	3.35e-05	0.000421386	2.49082
14629	645644	FLJ42627	hypothetical LOC645644	Hs.597810, Hs.677234	NA	A_32_P204785	ref|Homo sapiens hypothetical LOC645644 (FLJ42627), non-coding RNA [NR_024492]	-0.192145	0.875303	7.59049	-8.05067	6.66e-05	0.000672697	1.73366
32884	22950	SLC4A1AP	solute carrier family 4 (anion exchanger), member 1, adaptor protein	Hs.306000	ENSG00000163798	A_23_P56810	ref|Homo sapiens solute carrier family 4 (anion exchanger), member 1, adaptor protein (SLC4A1AP), mRNA [NM_018158]	-0.192143	0.875305	8.9942	-7.08211	0.000155252	0.00122174	0.799972
33379	345651	ACTBL2	actin, beta-like 2	Hs.482167	ENSG00000169067	A_24_P6903	ref|Homo sapiens actin, beta-like 2 (ACTBL2), mRNA [NM_001017992]	-0.191954	0.875419	7.57698	-6.01962	0.000438414	0.00260252	-0.343857
31319	1290	COL5A2	collagen, type V, alpha 2	Hs.445827	ENSG00000204262	A_23_P10391	ref|Homo sapiens collagen, type V, alpha 2 (COL5A2), mRNA [NM_000393]	-0.191825	0.875497	13.3459	-8.96967	3.21e-05	0.000410691	2.53747
35240	10627	MYL12A	myosin, light chain 12A, regulatory, non-sarcomeric	Hs.190086	ENSG00000101608	A_23_P4572	ref|Homo sapiens myosin regulatory light chain MRCL3 (MRCL3), mRNA [NM_006471]	-0.191817	0.875503	13.6387	-9.14869	2.81e-05	0.000376934	2.68575
1316	56143	PCDHA5	protocadherin alpha 5	Hs.199343	ENSG00000204965	A_23_P334045	ref|Homo sapiens protocadherin alpha 5 (PCDHA5), transcript variant 2, mRNA [NM_031501]	-0.191813	0.875505	9.13774	-6.07828	0.000412611	0.00248921	-0.277104
18032	91316	GUSBP11	glucuronidase, beta pseudogene 11	Hs.148656	NA	A_23_P143600	gb|Homo sapiens cDNA FLJ43820 fis, clone TESTI4002202, moderately similar to Lambda L-chain C region. [AK125808]	-0.191708	0.875569	8.52481	-9.13584	2.83e-05	0.00037881	2.67518
36659	79885	HDAC11	histone deacetylase 11	Hs.404802	ENSG00000163517	A_23_P155360	ref|Homo sapiens histone deacetylase 11 (HDAC11), transcript variant 2, mRNA [NM_024827]	-0.191545	0.875667	6.34495	-8.46595	4.75e-05	0.000531837	2.10606
27	7248	TSC1	tuberous sclerosis 1	Hs.370854	ENSG00000165699	A_24_P329635	ref|Homo sapiens tuberous sclerosis 1 (TSC1), transcript variant 1, mRNA [NM_000368]	-0.191437	0.875733	8.11216	-7.33411	0.00012351	0.00103724	1.05222
4875	123872	DNAAF1	dynein, axonemal, assembly factor 1	Hs.310164	ENSG00000154099	A_23_P54612	ref|Homo sapiens leucine rich repeat containing 50 (LRRC50), mRNA [NM_178452]	-0.19137	0.875774	5.2867	-5.09538	0.0012078	0.00558047	-1.45638
12370	374977	HEATR8	HEAT repeat containing 8	Hs.412482	ENSG00000184313	A_23_P160226	ref|Homo sapiens chromosome 1 open reading frame 175 (C1orf175), mRNA [NM_001039464]	-0.191303	0.875814	5.75785	-8.88143	3.43e-05	0.000428191	2.46344
31991	283701	LOC283701	hypothetical LOC283701	Hs.546844	NA	A_24_P222176	gb|Homo sapiens mRNA for FLJ00278 protein. [AK090401]	-0.191217	0.875867	5.47877	-8.51603	4.56e-05	0.00051792	2.14992
8662	55296	TBC1D19	TBC1 domain family, member 19	Hs.479403	ENSG00000109680	A_23_P136196	ref|Homo sapiens TBC1 domain family, member 19 (TBC1D19), mRNA [NM_018317]	-0.190976	0.876013	7.28051	-8.54137	4.47e-05	0.000511103	2.17203
26830	55749	CCAR1	cell division cycle and apoptosis regulator 1	Hs.49853	ENSG00000060339	A_23_P115842	ref|Homo sapiens cell division cycle and apoptosis regulator 1 (CCAR1), mRNA [NM_018237]	-0.190768	0.876139	10.3202	-4.90731	0.00150544	0.0065893	-1.69732
37272	23231	SEL1L3	sel-1 suppressor of lin-12-like 3 (C. elegans)	Hs.479384	ENSG00000091490	A_23_P426021	ref|Homo sapiens KIAA0746 protein (KIAA0746), mRNA [NM_015187]	-0.190628	0.876224	6.79022	-5.98184	0.000455982	0.00267931	-0.387089
21421	79135	APOO	apolipoprotein O	Hs.495851	ENSG00000184831	A_23_P61127	ref|Homo sapiens apolipoprotein O (APOO), transcript variant 1, mRNA [NM_024122]	-0.190549	0.876272	10.8755	-8.16479	6.06e-05	0.000628289	1.83756
42112	126248	WDR88	WD repeat domain 88	Hs.211046	ENSG00000166359	A_32_P346172	ref|Homo sapiens WD repeat domain 88 (WDR88), mRNA [NM_173479]	-0.190433	0.876342	4.90129	-4.97324	0.00139277	0.00620955	-1.61228
27387	27352	SGSM3	small G protein signaling modulator 3	Hs.474914	ENSG00000100359	A_23_P166491	ref|Homo sapiens small G protein signaling modulator 3 (SGSM3), mRNA [NM_015705]	-0.19033	0.876405	8.17471	-4.09965	0.00410989	0.0143408	-2.78963
22219	254065	BRWD3	bromodomain and WD repeat domain containing 3	Hs.147027, Hs.613180	ENSG00000165288	A_32_P489130	ref|Homo sapiens bromodomain and WD repeat domain containing 3 (BRWD3), mRNA [NM_153252]	-0.190246	0.876456	7.73928	-6.54906	0.000257308	0.00176347	0.242995
36807	93653	ST7-AS1	ST7 antisense RNA 1 (non-protein coding)	Hs.597516	NA	A_32_P181297	ref|Homo sapiens ST7 overlapping transcript 1 (non-protein coding) (ST7OT1), non-coding RNA [NR_002330]	-0.190021	0.876593	7.66486	-7.57978	9.94e-05	0.000887941	1.29166
35629	7087	ICAM5	intercellular adhesion molecule 5, telencephalin	Hs.465862	ENSG00000105376	A_23_P119143	ref|Homo sapiens intercellular adhesion molecule 5, telencephalin (ICAM5), mRNA [NM_003259]	-0.18996	0.87663	8.70596	-5.04635	0.00127858	0.00581947	-1.5187
37653	6578	SLCO2A1	solute carrier organic anion transporter family, member 2A1	Hs.518270	ENSG00000174640	A_23_P135990	ref|Homo sapiens solute carrier organic anion transporter family, member 2A1 (SLCO2A1), mRNA [NM_005630]	-0.189812	0.87672	5.60858	-4.35746	0.00295157	0.0110107	-2.43085
30752	65980	BRD9	bromodomain containing 9	Hs.449278	ENSG00000028310	A_23_P19004	ref|Homo sapiens bromodomain containing 9 (BRD9), transcript variant 1, mRNA [NM_023924]	-0.189777	0.876741	11.7168	-9.2024	2.7e-05	0.000366935	2.72973
32517	246243	RNASEH1	ribonuclease H1	Hs.568006	ENSG00000171865	A_24_P937582	gb|Homo sapiens cDNA FLJ14704 fis, clone NT2RP3000526. [AK027610]	-0.189728	0.876771	8.74105	-7.83979	7.95e-05	0.000759172	1.5384
25548	51227	PIGP	phosphatidylinositol glycan anchor biosynthesis, class P	Hs.656565, Hs.716087	ENSG00000185808	A_23_P143484	ref|Homo sapiens phosphatidylinositol glycan anchor biosynthesis, class P (PIGP), transcript variant 1, mRNA [NM_153681]	-0.189659	0.876813	8.61781	-4.16921	0.00375503	0.013343	-2.69191
9674	51092	SIDT2	SID1 transmembrane family, member 2	Hs.712144	ENSG00000149577	A_23_P98402	ref|Homo sapiens SID1 transmembrane family, member 2 (SIDT2), mRNA [NM_001040455]	-0.189621	0.876836	11.8317	-8.20237	5.88e-05	0.000615261	1.87152
33967	11103	KRR1	KRR1, small subunit (SSU) processome component, homolog (yeast)	Hs.645517	ENSG00000111615	A_32_P326819	ref|Homo sapiens KRR1, small subunit (SSU) processome component, homolog (yeast) (KRR1), mRNA [NM_007043]	-0.189505	0.876906	8.95151	-7.42362	0.000114041	0.000974899	1.14019
37129	93974	ATPIF1	ATPase inhibitory factor 1	Hs.590908	ENSG00000130770	A_23_P126716	ref|Homo sapiens ATPase inhibitory factor 1 (ATPIF1), nuclear gene encoding mitochondrial protein, transcript variant 3, mRNA [NM_178191]	-0.189486	0.876918	13.2665	-8.91971	3.33e-05	0.000420278	2.49563
12297	60681	FKBP10	FK506 binding protein 10, 65 kDa	Hs.463035	ENSG00000257282, ENSG00000141756	A_23_P15727	ref|Homo sapiens FK506 binding protein 10, 65 kDa (FKBP10), mRNA [NM_021939]	-0.189455	0.876937	12.5806	-4.81534	0.00167971	0.00716837	-1.81697
38143	2232	FDXR	ferredoxin reductase	Hs.69745	ENSG00000161513	A_23_P38154	ref|Homo sapiens ferredoxin reductase (FDXR), nuclear gene encoding mitochondrial protein, transcript variant 2, mRNA [NM_004110]	-0.189344	0.877004	11.0928	-8.08631	6.46e-05	0.000657707	1.76623
38543	89874	SLC25A21	solute carrier family 25 (mitochondrial oxodicarboxylate carrier), member 21	NA	ENSG00000183032	A_23_P136504	ref|Homo sapiens solute carrier family 25 (mitochondrial oxodicarboxylate carrier), member 21 (SLC25A21), nuclear gene encoding mitochondrial protein, mRNA [NM_030631]	-0.189299	0.877032	5.10811	-3.58569	0.00818985	0.0246697	-3.53145
7852	7699	ZNF140	zinc finger protein 140	Hs.181552	ENSG00000196387	A_23_P150841	ref|Homo sapiens zinc finger protein 140 (ZNF140), mRNA [NM_003440]	-0.188679	0.877409	6.97597	-5.59414	0.000689433	0.00365674	-0.841558
20773	4661	MYT1	myelin transcription factor 1	Hs.279562	ENSG00000196132	A_23_P210835	ref|Homo sapiens myelin transcription factor 1 (MYT1), mRNA [NM_004535]	-0.188473	0.877534	5.72058	-4.12755	0.00396336	0.0139236	-2.75035
19818	54507	ADAMTSL4	ADAMTS-like 4	Hs.516243	ENSG00000143382	A_23_P115011	ref|Homo sapiens ADAMTS-like 4 (ADAMTSL4), transcript variant 1, mRNA [NM_019032]	-0.188052	0.87779	6.11665	-7.57878	9.95e-05	0.000888345	1.2907
1818	285268	ZNF621	zinc finger protein 621	Hs.19977	ENSG00000172888	A_24_P340800	ref|Homo sapiens zinc finger protein 621 (ZNF621), transcript variant 1, mRNA [NM_198484]	-0.187978	0.877835	7.8085	-7.38975	0.000117525	0.000998976	1.107
24750	9831	ZNF623	zinc finger protein 623	Hs.43133, Hs.694018	ENSG00000183309	A_23_P258931	ref|Homo sapiens zinc finger protein 623 (ZNF623), transcript variant 1, mRNA [NM_014789]	-0.187955	0.877849	7.16681	-9.08246	2.95e-05	0.000388748	2.63119
23680	23015	GOLGA8A	golgin A8 family, member A	Hs.182982, Hs.720151	ENSG00000175265	A_24_P910580	ref|Homo sapiens golgi autoantigen, golgin subfamily a, 8A (GOLGA8A), mRNA [NM_181077]	-0.187891	0.877888	8.3872	-7.54674	0.000102317	0.000903892	1.25983
9735	27443	CECR2	cat eye syndrome chromosome region, candidate 2	Hs.658723	ENSG00000099954	A_23_P211326	ref|Homo sapiens cat eye syndrome chromosome region, candidate 2 (CECR2), mRNA [NM_031413]	-0.18771	0.877998	7.82064	-5.90504	0.000494156	0.00284353	-0.475532
38955	100130815	LOC100130815	hypothetical LOC100130815	Hs.638556	NA	A_32_P876086	gb|Homo sapiens mRNA; cDNA DKFZp434O1614 (from clone DKFZp434O1614). [AL834311]	-0.187669	0.878023	4.92057	-4.39133	0.00282803	0.0106557	-2.38441
27013	168090	C6orf118	chromosome 6 open reading frame 118	Hs.144734	ENSG00000112539	A_32_P85106	ref|Homo sapiens chromosome 6 open reading frame 118 (C6orf118), mRNA [NM_144980]	-0.187616	0.878056	7.44981	-8.09853	6.4e-05	0.000653545	1.77738
35323	10180	RBM6	RNA binding motif protein 6	Hs.696735	ENSG00000004534	A_23_P57941	ref|Homo sapiens RNA binding motif protein 6 (RBM6), mRNA [NM_005777]	-0.187547	0.878097	9.65036	-7.413	0.00011512	0.00098155	1.1298
30011	29956	CERS2	ceramide synthase 2	NA	ENSG00000143418	A_23_P63010	ref|Homo sapiens LAG1 homolog, ceramide synthase 2 (LASS2), transcript variant 1, mRNA [NM_181746]	-0.187439	0.878163	10.8334	-6.95855	0.000174081	0.00133009	0.673747
39406	53917	RAB24	RAB24, member RAS oncogene family	Hs.16258	ENSG00000169228	A_23_P61823	ref|Homo sapiens RAB24, member RAS oncogene family (RAB24), transcript variant 1, mRNA [NM_001031677]	-0.187244	0.878282	11.2142	-4.76323	0.00178826	0.00750955	-1.88532
18674	100288069	LOC100288069	hypothetical LOC100288069	Hs.527521	NA	A_24_P401981	gb|Homo sapiens cDNA clone IMAGE:4129277, partial cds. [BC006361]	-0.187028	0.878414	6.1094	-7.53507	0.000103369	0.000910032	1.24855
27807	285905	INTS4L1	integrator complex subunit 4-like 1	Hs.567827	NA	A_32_P345444	gb|Homo sapiens cDNA FLJ25037 fis, clone CBL03066. [AK057766]	-0.186989	0.878437	5.88949	-7.49435	0.000107133	0.00093257	1.2091
2221	254057	LOC254057	hypothetical protein LOC254057	Hs.586109	NA	A_24_P450092	gb|Homo sapiens cDNA: FLJ21000 fis, clone CAE03359. [AK024653]	-0.186626	0.878658	7.34763	-8.56897	4.38e-05	0.000503405	2.19605
28888	60561	RINT1	RAD50 interactor 1	Hs.531388	ENSG00000135249	A_23_P59677	ref|Homo sapiens RAD50 interactor 1 (RINT1), mRNA [NM_021930]	-0.186611	0.878668	8.80711	-7.7576	8.52e-05	0.000797247	1.46113
43113	222826	C6orf146	chromosome 6 open reading frame 146	Hs.657342	ENSG00000145975	A_23_P317760	ref|Homo sapiens chromosome 6 open reading frame 146 (C6orf146), mRNA [NM_173563]	-0.186584	0.878684	4.89446	-4.41173	0.00275635	0.0104464	-2.35652
20663	10650	SLMO1	slowmo homolog 1 (Drosophila)	Hs.514718	ENSG00000141391	A_23_P38677	ref|Homo sapiens slowmo homolog 1 (Drosophila) (SLMO1), transcript variant 2, mRNA [NM_006553]	-0.186529	0.878717	8.59052	-8.78538	3.7e-05	0.000450099	2.38212
38432	55731	C17orf63	chromosome 17 open reading frame 63	Hs.564533	ENSG00000173065	A_23_P141484	ref|Homo sapiens chromosome 17 open reading frame 63 (C17orf63), transcript variant 2, mRNA [NM_018182]	-0.186462	0.878758	9.69571	-7.73996	8.65e-05	0.00080557	1.44446
29160	7566	ZNF18	zinc finger protein 18	Hs.370473	ENSG00000154957	A_23_P141302	ref|Homo sapiens zinc finger protein 18 (ZNF18), mRNA [NM_144680]	-0.186442	0.87877	9.11533	-4.94066	0.00144723	0.0063919	-1.65421
29580	7442	TRPV1	transient receptor potential cation channel, subfamily V, member 1	Hs.579217, Hs.655380	ENSG00000196689	A_23_P375281	ref|Homo sapiens transient receptor potential cation channel, subfamily V, member 1 (TRPV1), transcript variant 3, mRNA [NM_080706]	-0.186375	0.878811	7.48331	-6.08922	0.000407987	0.00246836	-0.264698
34372	9400	RECQL5	RecQ protein-like 5	Hs.632229	ENSG00000108469	A_23_P332042	ref|Homo sapiens RecQ protein-like 5 (RECQL5), transcript variant 1, mRNA [NM_004259]	-0.186292	0.878862	8.17034	-4.62418	0.00211748	0.00853923	-2.06959
28574	7750	ZMYM2	zinc finger, MYM-type 2	Hs.507433	ENSG00000121741	A_23_P99405	ref|Homo sapiens zinc finger, MYM-type 2 (ZMYM2), mRNA [NM_003453]	-0.186271	0.878875	9.16242	-5.26966	0.000989127	0.00479047	-1.2376
35778	285855	RPL7L1	ribosomal protein L7-like 1	Hs.520133	ENSG00000146223	A_24_P332971	ref|Homo sapiens ribosomal protein L7-like 1 (RPL7L1), mRNA [NM_198486]	-0.186125	0.878963	9.04096	-6.21012	0.000360565	0.00226042	-0.128672
12860	6887	TAL2	T-cell acute lymphocytic leukemia 2	Hs.247978	ENSG00000186051	A_23_P409449	ref|Homo sapiens T-cell acute lymphocytic leukemia 2 (TAL2), mRNA [NM_005421]	-0.18609	0.878985	5.18423	-7.2068	0.00013853	0.00112526	0.925648
15198	317	APAF1	apoptotic peptidase activating factor 1	Hs.728891	ENSG00000120868	A_23_P36611	ref|Homo sapiens apoptotic peptidase activating factor 1 (APAF1), transcript variant 3, mRNA [NM_181861]	-0.186085	0.878988	6.28042	-8.56129	4.4e-05	0.00050525	2.18938
37587	162632	LOC162632	ubiquitin specific peptidase 6 (Tre-2 oncogene) pseudogene	Hs.419859	NA	A_24_P566764	ref|Homo sapiens TL132 pseudogene (LOC162632), non-coding RNA [NR_003190]	-0.186048	0.879011	10.0139	-7.23441	0.000135107	0.00110345	0.953239
16072	11253	MAN1B1	mannosidase, alpha, class 1B, member 1	Hs.279881	ENSG00000177239	A_23_P94857	ref|Homo sapiens mannosidase, alpha, class 1B, member 1 (MAN1B1), mRNA [NM_016219]	-0.185957	0.879065	10.0805	-2.93958	0.0205323	0.0504165	-4.50462
37132	55733	HHAT	hedgehog acyltransferase	Hs.58650	ENSG00000054392	A_23_P136355	ref|Homo sapiens hedgehog acyltransferase (HHAT), transcript variant 1, mRNA [NM_018194]	-0.185852	0.87913	6.04251	-6.122	0.000394478	0.00241168	-0.227636
36532	4232	MEST	mesoderm specific transcript homolog (mouse)	Hs.270978	ENSG00000106484	A_23_P156970	ref|Homo sapiens mesoderm specific transcript homolog (mouse) (MEST), transcript variant 1, mRNA [NM_002402]	-0.185818	0.87915	5.22833	-8.63696	4.15e-05	0.000487024	2.25494
22201	9709	HERPUD1	homocysteine-inducible, endoplasmic reticulum stress-inducible, ubiquitin-like domain member 1	Hs.146393	ENSG00000051108	A_23_P54846	ref|Homo sapiens homocysteine-inducible, endoplasmic reticulum stress-inducible, ubiquitin-like domain member 1 (HERPUD1), transcript variant 1, mRNA [NM_014685]	-0.185815	0.879152	12.2525	-5.14461	0.00114105	0.0053392	-1.39414
30655	26025	PCDHGA12	protocadherin gamma subfamily A, 12	Hs.368160	ENSG00000253159	A_24_P34944	ref|Homo sapiens protocadherin gamma subfamily A, 12 (PCDHGA12), transcript variant 2, mRNA [NM_032094]	-0.18578	0.879174	5.90855	-6.22569	0.000354917	0.00223335	-0.111289
31002	85021	REPS1	RALBP1 associated Eps domain containing 1	Hs.334603	ENSG00000135597	A_23_P70748	ref|Homo sapiens RALBP1 associated Eps domain containing 1 (REPS1), transcript variant 1, mRNA [NM_031922]	-0.185734	0.879201	9.87204	-4.32843	0.00306214	0.0113437	-2.47078
9575	92335	STRADA	STE20-related kinase adaptor alpha	Hs.514402	ENSG00000125695	A_24_P147407	ref|Homo sapiens STE20-related kinase adaptor alpha (STRADA), transcript variant 3, mRNA [NM_153335]	-0.185716	0.879213	8.37435	-8.24101	5.69e-05	0.000602697	1.9063
26351	4214	MAP3K1	mitogen-activated protein kinase kinase kinase 1	Hs.653654	ENSG00000095015	A_24_P766204	ref|Homo sapiens mitogen-activated protein kinase kinase kinase 1 (MAP3K1), mRNA [NM_005921]	-0.185662	0.879245	5.23493	-5.53772	0.000733358	0.00383624	-0.909381
19058	5653	KLK6	kallikrein-related peptidase 6	Hs.79361	ENSG00000167755	A_24_P236935	ref|Homo sapiens kallikrein-related peptidase 6 (KLK6), transcript variant B, mRNA [NM_001012964]	-0.185573	0.879299	6.75934	-6.30031	0.00032918	0.00211408	-0.0283862
6206	7776	ZNF236	zinc finger protein 236	Hs.719137	ENSG00000130856	A_23_P55601	ref|Homo sapiens zinc finger protein 236 (ZNF236), mRNA [NM_007345]	-0.185449	0.879375	6.45532	-5.91011	0.00049153	0.0028318	-0.46967
11063	51631	LUC7L2	LUC7-like 2 (S. cerevisiae)	Hs.728191	ENSG00000146963	A_23_P59791	ref|Homo sapiens LUC7-like 2 (S. cerevisiae) (LUC7L2), mRNA [NM_016019]	-0.185431	0.879386	9.75708	-7.16919	0.000143352	0.00115475	0.887915
26037	10737	RFPL3-AS1	RFPL3 antisense RNA 1 (non-protein coding)	Hs.274285	NA	A_24_P169048	ref|Homo sapiens RFPL3 antisense RNA (non-protein coding) (RFPL3S), non-coding RNA [NR_001450]	-0.18539	0.879411	5.76776	-7.36001	0.000120683	0.00101942	1.07776
36858	8703	B4GALT3	UDP-Gal:betaGlcNAc beta 1,4- galactosyltransferase, polypeptide 3	Hs.321231, Hs.517373	ENSG00000158850	A_23_P103919	ref|Homo sapiens UDP-Gal:betaGlcNAc beta 1,4- galactosyltransferase, polypeptide 3 (B4GALT3), mRNA [NM_003779]	-0.185288	0.879473	9.31849	-5.62756	0.000664797	0.00356487	-0.80159
27236	4054	LTBP3	latent transforming growth factor beta binding protein 3	Hs.289019	ENSG00000168056	A_24_P298360	ref|Homo sapiens latent transforming growth factor beta binding protein 3 (LTBP3), transcript variant 2, mRNA [NM_021070]	-0.185214	0.879519	8.24631	-5.3972	0.000856859	0.00430673	-1.08019
40120	6344	SCTR	secretin receptor	Hs.42091	ENSG00000080293	A_23_P28139	ref|Homo sapiens secretin receptor (SCTR), mRNA [NM_002980]	-0.18513	0.87957	4.97931	-5.89569	0.000499046	0.00286331	-0.486361
37478	57150	C6orf162	chromosome 6 open reading frame 162	Hs.70769	ENSG00000111850	A_23_P59255	ref|Homo sapiens chromosome 6 open reading frame 162 (C6orf162), transcript variant 1, mRNA [NM_001042493]	-0.185088	0.879595	10.0956	-4.0536	0.00436486	0.0150298	-2.85469
7194	388135	C15orf59	chromosome 15 open reading frame 59	Hs.40794	ENSG00000205363	A_32_P210168	ref|Homo sapiens chromosome 15 open reading frame 59 (C15orf59), mRNA [NM_001039614]	-0.185075	0.879603	7.98341	-6.3512	0.000312825	0.00203465	0.0277429
2946	5775	PTPN4	protein tyrosine phosphatase, non-receptor type 4 (megakaryocyte)	Hs.469809	ENSG00000088179	A_32_P96845	ref|Homo sapiens protein tyrosine phosphatase, non-receptor type 4 (megakaryocyte) (PTPN4), mRNA [NM_002830]	-0.18499	0.879655	9.02065	-5.96126	0.000465877	0.00272397	-0.410708
16172	9455	HOMER2	homer homolog 2 (Drosophila)	Hs.578443	ENSG00000103942	A_23_P99906	ref|Homo sapiens homer homolog 2 (Drosophila) (HOMER2), transcript variant 2, mRNA [NM_199330]	-0.184883	0.87972	6.13926	-3.79708	0.00613863	0.0196335	-3.22227
20068	81669	CCNL2	cyclin L2	Hs.515704	ENSG00000221978	A_23_P217899	ref|Homo sapiens cyclin L2 (CCNL2), transcript variant 2, mRNA [NM_001039577]	-0.184877	0.879724	9.50515	-7.00881	0.00016613	0.00128721	0.725298
35655	81490	PTDSS2	phosphatidylserine synthase 2	Hs.12851	ENSG00000174915	A_32_P353798	ref|Homo sapiens phosphatidylserine synthase 2 (PTDSS2), mRNA [NM_030783]	-0.184775	0.879786	9.94419	-8.64171	4.13e-05	0.000485858	2.25903
14534	266655	LINC00094	long intergenic non-protein coding RNA 94	Hs.654869	NA	A_32_P116058	ref|Homo sapiens non-protein coding RNA 94 (NCRNA00094), non-coding RNA [NR_015427]	-0.184728	0.879815	9.36378	-6.93174	0.000178494	0.00135403	0.646139
36127	254013	METTL20	methyltransferase like 20	Hs.585084	ENSG00000139160	A_23_P404120	ref|Homo sapiens chromosome 12 open reading frame 72 (C12orf72), transcript variant 1, mRNA [NM_173802]	-0.184617	0.879883	5.52684	-7.59302	9.83e-05	0.000880651	1.30439
23453	55743	CHFR	checkpoint with forkhead and ring finger domains	Hs.720197	ENSG00000072609	A_23_P344037	ref|Homo sapiens checkpoint with forkhead and ring finger domains (CHFR), mRNA [NM_018223]	-0.184524	0.87994	7.5757	-7.5394	0.000102977	0.000907688	1.25274
4199	81621	KAZALD1	Kazal-type serine peptidase inhibitor domain 1	Hs.534859, Hs.632079	ENSG00000107821	A_23_P421011	ref|Homo sapiens Kazal-type serine peptidase inhibitor domain 1 (KAZALD1), mRNA [NM_030929]	-0.184381	0.880027	7.41666	-7.87188	7.73e-05	0.000745182	1.56838
23909	90333	ZNF468	zinc finger protein 468	Hs.467223	ENSG00000204604	A_24_P109854	ref|Homo sapiens zinc finger protein 468 (ZNF468), transcript variant 1, mRNA [NM_199132]	-0.184328	0.880059	5.35679	-8.81593	3.61e-05	0.000443301	2.40807
42045	10736	SIX2	SIX homeobox 2	Hs.101937	ENSG00000170577	A_23_P28120	ref|Homo sapiens SIX homeobox 2 (SIX2), mRNA [NM_016932]	-0.184325	0.880061	5.08506	-5.46673	0.000793087	0.00405863	-0.995331
31018	113246	C12orf57	chromosome 12 open reading frame 57	Hs.405913	ENSG00000111678	A_23_P350551	ref|Homo sapiens chromosome 12 open reading frame 57 (C12orf57), mRNA [NM_138425]	-0.18431	0.88007	12.2611	-6.00667	0.000444347	0.00262739	-0.35865
5982	7756	ZNF207	zinc finger protein 207	Hs.500775	ENSG00000010244	A_23_P118690	ref|Homo sapiens zinc finger protein 207 (ZNF207), transcript variant 2, mRNA [NM_001032293]	-0.184221	0.880124	9.6241	-7.25435	0.000132693	0.00109113	0.973123
26658	57571	CARNS1	carnosine synthase 1	Hs.502982	ENSG00000172508	A_23_P344884	ref|Homo sapiens ATP-grasp domain containing 1 (ATPGD1), mRNA [NM_020811]	-0.184216	0.880127	5.38807	-8.18158	5.98e-05	0.000622884	1.85276
851	79982	DNAJB14	DnaJ (Hsp40) homolog, subfamily B, member 14	Hs.577426	ENSG00000164031	A_23_P213199	ref|Homo sapiens DnaJ (Hsp40) homolog, subfamily B, member 14 (DNAJB14), transcript variant 1, mRNA [NM_001031723]	-0.184109	0.880193	7.68902	-8.00425	6.92e-05	0.000692276	1.69104
35294	26048	ZNF500	zinc finger protein 500	Hs.513316	ENSG00000103199	A_24_P126305	ref|Homo sapiens zinc finger protein 500 (ZNF500), mRNA [NM_021646]	-0.183879	0.880333	8.10206	-7.02167	0.000164161	0.00127633	0.738446
42597	1152	CKB	creatine kinase, brain	Hs.173724	ENSG00000166165	A_23_P25674	ref|Homo sapiens creatine kinase, brain (CKB), mRNA [NM_001823]	-0.183814	0.880373	9.49314	-8.19265	5.92e-05	0.00061883	1.86275
15130	84727	SPSB2	splA/ryanodine receptor domain and SOCS box containing 2	Hs.479856	ENSG00000111671	A_23_P151098	ref|Homo sapiens splA/ryanodine receptor domain and SOCS box containing 2 (SPSB2), mRNA [NM_032641]	-0.183749	0.880412	9.01618	-6.03145	0.000433071	0.00257928	-0.330364
34917	115004	MB21D1	Mab-21 domain containing 1	Hs.658405	ENSG00000164430	A_32_P1173	ref|Homo sapiens chromosome 6 open reading frame 150 (C6orf150), mRNA [NM_138441]	-0.183665	0.880463	6.6628	-7.10446	0.000152095	0.00120601	0.822626
11025	197259	MLKL	mixed lineage kinase domain-like	Hs.119878	ENSG00000168404	A_24_P185044	ref|Homo sapiens mixed lineage kinase domain-like (MLKL), transcript variant 1, mRNA [NM_152649]	-0.183581	0.880515	6.72425	-7.49075	0.000107473	0.000934776	1.20561
25246	259292	TAS2R46	taste receptor, type 2, member 46	Hs.688193	ENSG00000226761	A_23_P376114	ref|Homo sapiens taste receptor, type 2, member 46 (TAS2R46), mRNA [NM_176887]	-0.183507	0.88056	8.03182	-5.62992	0.000663096	0.00355795	-0.798776
26035	259173	ALS2CL	ALS2 C-terminal like	Hs.517937	ENSG00000178038	A_32_P420009	ref|Homo sapiens ALS2 C-terminal like (ALS2CL), transcript variant 1, mRNA [NM_147129]	-0.183496	0.880566	5.94078	-5.55778	0.000717393	0.00377413	-0.885215
36006	79686	LINC00341	long intergenic non-protein coding RNA 341	Hs.41502	NA	A_23_P14302	gb|Homo sapiens chromosome 14 open reading frame 139, mRNA (cDNA clone MGC:14946 IMAGE:3532035), complete cds. [BC008299]	-0.183175	0.880763	6.40342	-5.76135	0.000575508	0.00318287	-0.643105
42553	387129	NPSR1	neuropeptide S receptor 1	Hs.652373	ENSG00000187258	A_23_P19886	ref|Homo sapiens neuropeptide S receptor 1 (NPSR1), transcript variant 2, mRNA [NM_207173]	-0.183103	0.880807	4.85879	-4.8978	0.0015225	0.00664425	-1.70963
17365	25912	C1orf43	chromosome 1 open reading frame 43	Hs.287471	ENSG00000143612	A_24_P393461	ref|Homo sapiens chromosome 1 open reading frame 43 (C1orf43), transcript variant 2, mRNA [NM_138740]	-0.182934	0.880909	10.4028	-8.71939	3.89e-05	0.00046535	2.3258
25514	151393	FAM82A1	family with sequence similarity 82, member A1	Hs.591566	ENSG00000115841	A_23_P102160	gb|Homo sapiens unknown mRNA. [AF435956]	-0.182922	0.880917	6.95245	-5.78708	0.000559905	0.00311724	-0.61289
22354	100131096	LOC100131096	hypothetical LOC100131096	Hs.635442	NA	A_32_P19000	gb|Homo sapiens cDNA clone IMAGE:5286005. [BC041417]	-0.182873	0.880947	5.17176	-8.0065	6.91e-05	0.000691455	1.69311
16572	80237	ELL3	elongation factor RNA polymerase II-like 3	Hs.706346	ENSG00000128886	A_24_P47988	ref|Homo sapiens elongation factor RNA polymerase II-like 3 (ELL3), mRNA [NM_025165]	-0.18283	0.880973	7.35298	-6.35485	0.000311687	0.00202847	0.0317579
37751	9862	MED24	mediator complex subunit 24	Hs.462983	ENSG00000008838	A_23_P124760	ref|Homo sapiens mediator complex subunit 24 (MED24), transcript variant 1, mRNA [NM_014815]	-0.182817	0.880981	7.85501	-6.61749	0.00024074	0.00168099	0.316345
18584	340061	TMEM173	transmembrane protein 173	Hs.379754	ENSG00000184584	A_23_P61371	ref|Homo sapiens transmembrane protein 173 (TMEM173), mRNA [NM_198282]	-0.182816	0.880982	6.94759	-7.88073	7.68e-05	0.000741955	1.57664
12099	80017	C14orf159	chromosome 14 open reading frame 159	Hs.309849	ENSG00000133943	A_23_P48771	ref|Homo sapiens chromosome 14 open reading frame 159 (C14orf159), transcript variant 3, mRNA [NM_024952]	-0.1828	0.880991	8.71395	-8.56651	4.38e-05	0.000504108	2.19391
16690	127495	LRRC39	leucine rich repeat containing 39	Hs.44277	ENSG00000122477	A_23_P330578	ref|Homo sapiens leucine rich repeat containing 39 (LRRC39), mRNA [NM_144620]	-0.182762	0.881015	6.10972	-6.94051	0.000177036	0.00134603	0.655186
41840	4047	LSS	lanosterol synthase (2,3-oxidosqualene-lanosterol cyclase)	Hs.596543	ENSG00000160285	A_24_P384839	ref|Homo sapiens lanosterol synthase (2,3-oxidosqualene-lanosterol cyclase) (LSS), transcript variant 1, mRNA [NM_002340]	-0.182565	0.881135	10.8463	-7.60437	9.73e-05	0.000874521	1.31529
30913	60680	CELF5	CUGBP, Elav-like family member 5	Hs.655747	ENSG00000161082	A_23_P60775	ref|Homo sapiens bruno-like 5, RNA binding protein (Drosophila) (BRUNOL5), mRNA [NM_021938]	-0.182491	0.88118	5.03344	-3.29764	0.0122552	0.0336209	-3.96083
3348	100505576	LOC100505576	hypothetical LOC100505576	Hs.634043	NA	A_32_P226678	gb|BX114764 NCI_CGAP_GCB1 Homo sapiens cDNA clone IMAGp998M182012, mRNA sequence [BX114764]	-0.182392	0.881241	5.81854	-7.13718	0.000147604	0.0011804	0.85568
31660	115708	TRMT61A	tRNA methyltransferase 61 homolog A (S. cerevisiae)	Hs.525610	ENSG00000166166	A_24_P373126	ref|Homo sapiens chromosome 14 open reading frame 172 (C14orf172), mRNA [NM_152307]	-0.182293	0.881301	6.3553	-5.16907	0.00110941	0.00521307	-1.36334
6207	51661	FKBP7	FK506 binding protein 7	Hs.410378	ENSG00000079150	A_23_P79622	ref|Homo sapiens FK506 binding protein 7 (FKBP7), transcript variant 1, mRNA [NM_181342]	-0.182289	0.881304	7.04388	-6.31803	0.000323378	0.00208485	-0.0088013
9197	59285	CACNG6	calcium channel, voltage-dependent, gamma subunit 6	Hs.631560	ENSG00000130433	A_23_P501933	ref|Homo sapiens calcium channel, voltage-dependent, gamma subunit 6 (CACNG6), transcript variant 1, mRNA [NM_145814]	-0.182224	0.881344	9.17577	-7.79223	8.28e-05	0.000781581	1.49376
21581	79659	DYNC2H1	dynein, cytoplasmic 2, heavy chain 1	Hs.503721	ENSG00000187240	A_24_P917015	ref|Homo sapiens dynein, cytoplasmic 2, heavy chain 1 (DYNC2H1), mRNA [NM_001080463]	-0.182153	0.881387	7.62471	-8.61844	4.21e-05	0.000491607	2.23893
29783	83449	PMFBP1	polyamine modulated factor 1 binding protein 1	Hs.714939	ENSG00000118557	A_23_P106874	ref|Homo sapiens polyamine modulated factor 1 binding protein 1 (PMFBP1), mRNA [NM_031293]	-0.182102	0.881418	6.23045	-7.46239	0.000110194	0.000951769	1.17803
24283	55815	TSNAXIP1	translin-associated factor X interacting protein 1	Hs.632212	ENSG00000102904	A_23_P129425	ref|Homo sapiens translin-associated factor X interacting protein 1 (TSNAXIP1), mRNA [NM_018430]	-0.181945	0.881514	6.48299	-5.36844	0.000884878	0.00441482	-1.11549
3942	51503	CWC15	CWC15 spliceosome-associated protein homolog (S. cerevisiae)	Hs.503597	NA	A_23_P98218	ref|Homo sapiens CWC15 spliceosome-associated protein homolog (S. cerevisiae) (CWC15), mRNA [NM_016403]	-0.181897	0.881543	10.4302	-7.70003	8.96e-05	0.000826077	1.40661
22455	4987	OPRL1	opiate receptor-like 1	Hs.2859	ENSG00000125510	A_23_P345564	ref|Homo sapiens opiate receptor-like 1 (OPRL1), transcript variant 1, mRNA [NM_182647]	-0.181811	0.881596	6.19282	-5.75271	0.000580854	0.00320385	-0.653268
41408	9895	TECPR2	tectonin beta-propeller repeat containing 2	Hs.195667	ENSG00000196663	A_32_P355396	ref|Homo sapiens KIAA0329 (KIAA0329), mRNA [NM_014844]	-0.181766	0.881623	7.0319	-7.65654	9.3e-05	0.000846875	1.36521
19107	6709	SPTAN1	spectrin, alpha, non-erythrocytic 1 (alpha-fodrin)	Hs.372331	ENSG00000197694	A_23_P20832	ref|Homo sapiens spectrin, alpha, non-erythrocytic 1 (alpha-fodrin) (SPTAN1), transcript variant 2, mRNA [NM_003127]	-0.181743	0.881637	9.45252	-8.75848	3.77e-05	0.000455975	2.3592
26802	81544	GDPD5	glycerophosphodiester phosphodiesterase domain containing 5	Hs.503297	ENSG00000158555	A_24_P261567	ref|Homo sapiens glycerophosphodiester phosphodiesterase domain containing 5 (GDPD5), mRNA [NM_030792]	-0.181704	0.881661	7.42015	-6.85647	0.000191571	0.00143096	0.568184
34152	9295	SRSF11	serine/arginine-rich splicing factor 11	Hs.479693	ENSG00000116754	A_23_P11664	ref|Homo sapiens splicing factor, arginine/serine-rich 11 (SFRS11), mRNA [NM_004768]	-0.181582	0.881736	12.1132	-8.23584	5.72e-05	0.000604162	1.90165
41761	268	AMH	anti-Mullerian hormone	Hs.112432	ENSG00000104899	A_23_P78944	ref|Homo sapiens anti-Mullerian hormone (AMH), mRNA [NM_000479]	-0.181499	0.881787	8.08892	-8.52253	4.54e-05	0.000516573	2.15559
41978	26993	AKAP8L	A kinase (PRKA) anchor protein 8-like	Hs.399800	ENSG00000011243	A_23_P153767	ref|Homo sapiens A kinase (PRKA) anchor protein 8-like (AKAP8L), mRNA [NM_014371]	-0.181492	0.881791	8.26314	-3.66031	0.00739192	0.0227609	-3.4217
18503	388581	FAM132A	family with sequence similarity 132, member A	Hs.197613	ENSG00000184163	A_32_P75792	ref|Homo sapiens family with sequence similarity 132, member A (FAM132A), mRNA [NM_001014980]	-0.181479	0.881799	7.1344	-6.93079	0.000178654	0.00135501	0.645156
31755	55683	KIAA1310	KIAA1310	Hs.516341	ENSG00000114982	A_23_P209538	ref|Homo sapiens KIAA1310 (KIAA1310), transcript variant 2, mRNA [NM_017991]	-0.181406	0.881843	8.3264	-7.45672	0.000110748	0.000955221	1.1725
1671	201163	FLCN	folliculin	Hs.31652	ENSG00000154803	A_24_P173124	ref|Homo sapiens folliculin (FLCN), transcript variant 1, mRNA [NM_144997]	-0.181344	0.881881	5.46683	-4.5953	0.00219392	0.00877892	-2.10822
18099	59343	SENP2	SUMO1/sentrin/SMT3 specific peptidase 2	Hs.401388	ENSG00000163904	A_23_P257988	gb|Homo sapiens sentrin-specific protease (SENP2) mRNA, complete cds. [AF151697]	-0.181262	0.881931	8.07037	-7.15681	0.00014498	0.001165	0.875464
7954	55314	TMEM144	transmembrane protein 144	Hs.176227	ENSG00000164124	A_23_P133120	ref|Homo sapiens transmembrane protein 144 (TMEM144), mRNA [NM_018342]	-0.181185	0.881978	6.79053	-7.28981	0.000128519	0.00106692	1.00838
30463	1028	CDKN1C	cyclin-dependent kinase inhibitor 1C (p57, Kip2)	Hs.106070	ENSG00000129757	A_23_P428129	ref|Homo sapiens cyclin-dependent kinase inhibitor 1C (p57, Kip2) (CDKN1C), transcript variant 1, mRNA [NM_000076]	-0.180976	0.882106	8.85082	-6.70835	0.000220553	0.00157866	0.412876
42629	54511	HMGCLL1	3-hydroxymethyl-3-methylglutaryl-CoA lyase-like 1	Hs.147054	ENSG00000146151	A_32_P49508	ref|Homo sapiens 3-hydroxymethyl-3-methylglutaryl-Coenzyme A lyase-like 1 (HMGCLL1), transcript variant 1, mRNA [NM_019036]	-0.180817	0.882203	5.03172	-4.60598	0.00216531	0.00869011	-2.09393
23692	84268	RPAIN	RPA interacting protein	Hs.462086, Hs.555866	ENSG00000129197	A_24_P187119	ens|CDNA FLJ25625 fis, clone STM02974 [Source:UniProtKB/TrEMBL;Acc:Q8N1H0] [ENST00000399576]	-0.180644	0.882309	7.44466	-5.69846	0.000615703	0.00335343	-0.717303
37005	9860	LRIG2	leucine-rich repeats and immunoglobulin-like domains 2	Hs.448972, Hs.729143	ENSG00000198799	A_23_P160869	ref|Homo sapiens leucine-rich repeats and immunoglobulin-like domains 2 (LRIG2), mRNA [NM_014813]	-0.180613	0.882328	8.69716	-5.95879	0.000467082	0.00272974	-0.41355
14139	494150	LOC494150	prohibitin pseudogene	Hs.662179	NA	A_24_P325006	gb|Homo sapiens prohibitin pseudogene, mRNA (cDNA clone IMAGE:4547239). [BC014228]	-0.180387	0.882467	6.26671	-5.78759	0.000559602	0.00311596	-0.612295
13832	114790	STK11IP	serine/threonine kinase 11 interacting protein	Hs.22410	ENSG00000144589	A_23_P321320	ref|Homo sapiens serine/threonine kinase 11 interacting protein (STK11IP), mRNA [NM_052902]	-0.180354	0.882487	10.8589	-6.48511	0.000273946	0.00184477	0.173949
2350	55814	BDP1	B double prime 1, subunit of RNA polymerase III transcription initiation factor IIIB	Hs.258272	ENSG00000256410, ENSG00000145734	A_24_P247910	gb|Homo sapiens mRNA for KIAA1241 protein, partial cds. [AB033067]	-0.18035	0.882489	6.2574	-5.23441	0.00102956	0.00494185	-1.2815
22299	59348	ZNF350	zinc finger protein 350	Hs.407694	ENSG00000256683	A_23_P78458	ref|Homo sapiens zinc finger protein 350 (ZNF350), mRNA [NM_021632]	-0.180038	0.88268	6.59847	-5.10173	0.00119895	0.00554417	-1.44833
38325	23475	QPRT	quinolinate phosphoribosyltransferase	Hs.513484	ENSG00000103485	A_23_P34233	ref|Homo sapiens quinolinate phosphoribosyltransferase (QPRT), mRNA [NM_014298]	-0.17987	0.882783	8.39754	-6.14516	0.000385233	0.00237341	-0.20153
39898	29937	NENF	neudesin neurotrophic factor	Hs.461787	ENSG00000117691	A_23_P137948	ref|Homo sapiens neuron derived neurotrophic factor (NENF), mRNA [NM_013349]	-0.17974	0.882862	10.6811	-7.57423	9.99e-05	0.000890623	1.28632
18530	4999	ORC2	origin recognition complex, subunit 2	Hs.444870	ENSG00000115942	A_23_P39616	ref|Homo sapiens origin recognition complex, subunit 2-like (yeast) (ORC2L), mRNA [NM_006190]	-0.179664	0.882909	9.0136	-6.95878	0.000174042	0.00133003	0.673992
18626	10906	TRAFD1	TRAF-type zinc finger domain containing 1	Hs.5148	ENSG00000135148	A_23_P128541	ref|Homo sapiens TRAF-type zinc finger domain containing 1 (TRAFD1), transcript variant 2, mRNA [NM_006700]	-0.179555	0.882975	7.86544	-8.11956	6.29e-05	0.000645007	1.79653
35686	29894	CPSF1	cleavage and polyadenylation specific factor 1, 160kDa	Hs.493202	ENSG00000256775, ENSG00000071894	A_23_P169112	ref|Homo sapiens cleavage and polyadenylation specific factor 1, 160kDa (CPSF1), mRNA [NM_013291]	-0.179528	0.882992	11.0708	-8.57334	4.36e-05	0.000502998	2.19985
40128	113791	PIK3IP1	phosphoinositide-3-kinase interacting protein 1	Hs.26670	ENSG00000100100	A_24_P134488	ref|Homo sapiens phosphoinositide-3-kinase interacting protein 1 (PIK3IP1), transcript variant 1, mRNA [NM_052880]	-0.179489	0.883016	5.94107	-5.87916	0.000507814	0.0028972	-0.505516
24579	9851	KIAA0753	KIAA0753	Hs.28070	ENSG00000198920	A_23_P89543	ref|Homo sapiens KIAA0753 (KIAA0753), mRNA [NM_014804]	-0.179347	0.883103	9.85683	-6.12796	0.000392074	0.00240274	-0.220907
22929	10585	POMT1	protein-O-mannosyltransferase 1	Hs.522449	ENSG00000130714	A_23_P146361	ref|Homo sapiens protein-O-mannosyltransferase 1 (POMT1), transcript variant 1, mRNA [NM_007171]	-0.179128	0.883237	8.79304	-8.31006	5.38e-05	0.000579303	1.96811
42346	138474	TAF1L	TAF1 RNA polymerase II, TATA box binding protein (TBP)-associated factor, 210kDa-like	Hs.591086	ENSG00000122728	A_23_P419850	ref|Homo sapiens TAF1 RNA polymerase II, TATA box binding protein (TBP)-associated factor, 210kDa-like (TAF1L), mRNA [NM_153809]	-0.179082	0.883265	7.06578	-7.01787	0.00016474	0.00127969	0.73456
9595	11146	GLMN	glomulin, FKBP associated protein	Hs.49105	ENSG00000174842	A_23_P160742	ref|Homo sapiens glomulin, FKBP associated protein (GLMN), mRNA [NM_053274]	-0.179063	0.883276	9.07842	-7.28372	0.000129225	0.00107071	1.00233
30336	220906	LOC220906	hypothetical LOC220906	Hs.403253	NA	A_24_P879563	gb|Homo sapiens hypothetical protein LOC220906, mRNA (cDNA clone IMAGE:4837455). [BC045818]	-0.178972	0.883332	7.87127	-7.56541	0.000100661	0.000894729	1.27782
4559	3915	LAMC1	laminin, gamma 1 (formerly LAMB2)	Hs.609663	ENSG00000135862	A_23_P201628	ref|Homo sapiens laminin, gamma 1 (formerly LAMB2) (LAMC1), mRNA [NM_002293]	-0.178969	0.883334	9.57851	-6.45797	0.000281369	0.00188227	0.144494
1250	60560	NAA35	N(alpha)-acetyltransferase 35, NatC auxiliary subunit	Hs.436098	ENSG00000135040	A_23_P20676	ref|Homo sapiens MAK10 homolog, amino-acid N-acetyltransferase subunit (S. cerevisiae) (MAK10), mRNA [NM_024635]	-0.178918	0.883366	8.75267	-5.9855	0.000454243	0.00267045	-0.382885
19433	23616	SH3BP1	SH3-domain binding protein 1	Hs.601143	ENSG00000100092	A_23_P143692	ref|Homo sapiens SH3-domain binding protein 1 (SH3BP1), mRNA [NM_018957]	-0.178913	0.883368	6.2073	-4.82976	0.00165098	0.00707101	-1.79813
34856	400720	ZNF772	zinc finger protein 772	Hs.388810	ENSG00000197128	A_23_P67089	ref|Homo sapiens zinc finger protein 772 (ZNF772), mRNA [NM_001024596]	-0.178896	0.883379	5.89436	-5.67377	0.000632329	0.00342763	-0.74658
19075	64427	TTC31	tetratricopeptide repeat domain 31	Hs.557709	ENSG00000115282	A_23_P39813	ref|Homo sapiens tetratricopeptide repeat domain 31 (TTC31), mRNA [NM_022492]	-0.178842	0.883412	7.31519	-6.66396	0.00023017	0.00162736	0.365833
32710	441124	LOC441124	hypothetical gene supported by AK093729; BX647918	Hs.520589	NA	A_24_P456944	gb|Homo sapiens cDNA FLJ41452 fis, clone BRSTN2010363. [AK123446]	-0.178682	0.88351	6.01496	-6.11443	0.000397553	0.00242501	-0.236185
10740	54463	FAM134B	family with sequence similarity 134, member B	Hs.662367	ENSG00000154153	A_24_P266048	ref|Homo sapiens family with sequence similarity 134, member B (FAM134B), transcript variant 1, mRNA [NM_001034850]	-0.17865	0.883529	6.02104	-4.57705	0.00224375	0.00891895	-2.13268
34172	6549	SLC9A2	solute carrier family 9 (sodium/hydrogen exchanger), member 2	Hs.250083	ENSG00000115616	A_23_P5536	ref|Homo sapiens solute carrier family 9 (sodium/hydrogen exchanger), member 2 (SLC9A2), mRNA [NM_003048]	-0.178635	0.883538	4.9578	-4.00313	0.0046641	0.0158538	-2.92631
43357	9203	ZMYM3	zinc finger, MYM-type 3	Hs.522684	ENSG00000147130	A_24_P16815	ref|Homo sapiens zinc finger, MYM-type 3 (ZMYM3), transcript variant 1, mRNA [NM_005096]	-0.178482	0.883632	8.48258	-5.24381	0.00101859	0.00490263	-1.26977
30728	6999	TDO2	tryptophan 2,3-dioxygenase	Hs.183671	ENSG00000255589, ENSG00000151790	A_23_P80974	ref|Homo sapiens tryptophan 2,3-dioxygenase (TDO2), mRNA [NM_005651]	-0.178401	0.883682	5.24218	-7.69648	8.98e-05	0.000827902	1.40324
31954	255043	TMEM86B	transmembrane protein 86B	Hs.135215	ENSG00000180089	A_23_P108054	ref|Homo sapiens transmembrane protein 86B (TMEM86B), mRNA [NM_173804]	-0.178347	0.883715	7.96315	-6.69199	0.000224044	0.00159628	0.395564
41891	91404	SESTD1	SEC14 and spectrin domains 1	Hs.30977	ENSG00000187231	A_23_P367610	ref|Homo sapiens SEC14 and spectrin domains 1 (SESTD1), mRNA [NM_178123]	-0.178316	0.883734	4.88471	-4.89685	0.00152421	0.00664865	-1.71086
33630	10058	ABCB6	ATP-binding cassette, sub-family B (MDR/TAP), member 6	Hs.107911	ENSG00000115657	A_23_P5441	ref|Homo sapiens ATP-binding cassette, sub-family B (MDR/TAP), member 6 (ABCB6), nuclear gene encoding mitochondrial protein, mRNA [NM_005689]	-0.178295	0.883747	8.56005	-5.999	0.000447906	0.00264246	-0.367426
40417	55526	DHTKD1	dehydrogenase E1 and transketolase domain containing 1	Hs.104980, Hs.711138	ENSG00000181192	A_24_P722216	ref|Homo sapiens dehydrogenase E1 and transketolase domain containing 1 (DHTKD1), mRNA [NM_018706]	-0.178219	0.883793	9.01527	-3.46044	0.00974488	0.0281608	-3.7171
16663	51542	VPS54	vacuolar protein sorting 54 homolog (S. cerevisiae)	Hs.48499	ENSG00000143952	A_23_P131737	ref|Homo sapiens vacuolar protein sorting 54 homolog (S. cerevisiae) (VPS54), transcript variant 1, mRNA [NM_016516]	-0.178174	0.883821	8.85425	-5.35893	0.000894368	0.00444871	-1.12719
8846	84461	NEURL4	neuralized homolog 4 (Drosophila)	Hs.654794	ENSG00000215041	A_23_P360179	ref|Homo sapiens KIAA1787 protein (KIAA1787), transcript variant 1, mRNA [NM_032442]	-0.178062	0.88389	9.799	-7.69443	9e-05	0.000828658	1.40129
36647	9132	KCNQ4	potassium voltage-gated channel, KQT-like subfamily, member 4	Hs.473058	ENSG00000117013	A_23_P34424	ref|Homo sapiens potassium voltage-gated channel, KQT-like subfamily, member 4 (KCNQ4), transcript variant 1, mRNA [NM_004700]	-0.177945	0.883961	5.84539	-5.63377	0.000660329	0.00354486	-0.794182
16800	201255	LRRC45	leucine rich repeat containing 45	Hs.143774	ENSG00000169683	A_23_P381461	ref|Homo sapiens leucine rich repeat containing 45 (LRRC45), mRNA [NM_144999]	-0.177838	0.884027	8.97072	-5.27656	0.000981415	0.00476279	-1.22902
21156	2039	EPB49	erythrocyte membrane protein band 4.9 (dematin)	Hs.106124	ENSG00000158856	A_23_P219117	ref|Homo sapiens erythrocyte membrane protein band 4.9 (dematin) (EPB49), transcript variant 1, mRNA [NM_001978]	-0.177826	0.884034	6.83358	-7.04712	0.000160342	0.00125225	0.7644
40174	2733	GLE1	GLE1 RNA export mediator homolog (yeast)	Hs.522418	ENSG00000119392	A_23_P258367	ref|Homo sapiens GLE1 RNA export mediator homolog (yeast) (GLE1), transcript variant 2, mRNA [NM_001499]	-0.177697	0.884113	9.87914	-7.8455	7.91e-05	0.000756333	1.54375
36300	79037	PVRIG	poliovirus receptor related immunoglobulin domain containing	Hs.729356	ENSG00000213413	A_23_P8424	ref|Homo sapiens poliovirus receptor related immunoglobulin domain containing (PVRIG), mRNA [NM_024070]	-0.177626	0.884157	6.5622	-5.79109	0.00055752	0.00310835	-0.608198
30912	4356	MPP3	membrane protein, palmitoylated 3 (MAGUK p55 subfamily member 3)	Hs.396566	ENSG00000161647	A_23_P141346	ref|Homo sapiens membrane protein, palmitoylated 3 (MAGUK p55 subfamily member 3) (MPP3), transcript variant 1, mRNA [NM_001932]	-0.177615	0.884163	8.52699	-8.45576	4.79e-05	0.00053424	2.09711
5096	23097	CDK19	cyclin-dependent kinase 19	Hs.584867	ENSG00000155111	A_24_P699896	gb|Homo sapiens cell division cycle 2-like 6 (CDK8-like), mRNA (cDNA clone IMAGE:5296862). [BC036637]	-0.177565	0.884194	8.22632	-5.1712	0.0011067	0.0052043	-1.36067
34357	440275	EIF2AK4	eukaryotic translation initiation factor 2 alpha kinase 4	Hs.656673	ENSG00000128829	A_23_P54540	ref|Homo sapiens eukaryotic translation initiation factor 2 alpha kinase 4 (EIF2AK4), mRNA [NM_001013703]	-0.177563	0.884196	7.83694	-7.25144	0.000133043	0.00109276	0.970219
1047	55680	RUFY2	RUN and FYVE domain containing 2	Hs.653144	ENSG00000204130	A_24_P941708	ref|Homo sapiens RUN and FYVE domain containing 2 (RUFY2), transcript variant 2, mRNA [NM_001042417]	-0.177544	0.884207	7.03517	-4.69805	0.00193499	0.00797304	-1.97135
13653	8398	PLA2G6	phospholipase A2, group VI (cytosolic, calcium-independent)	Hs.170479	ENSG00000184381	A_23_P6464	ref|Homo sapiens phospholipase A2, group VI (cytosolic, calcium-independent) (PLA2G6), transcript variant 1, mRNA [NM_003560]	-0.177532	0.884214	6.48357	-8.14885	6.14e-05	0.000633996	1.82312
19148	64080	RBKS	ribokinase	Hs.11916	ENSG00000171174	A_23_P9523	ref|Homo sapiens ribokinase (RBKS), mRNA [NM_022128]	-0.1775	0.884234	9.41585	-6.07026	0.000416036	0.00250499	-0.2862
37923	80723	TMEM22	transmembrane protein 22	Hs.477692	ENSG00000168917	A_24_P371281	ref|Homo sapiens transmembrane protein 22 (TMEM22), transcript variant 1, mRNA [NM_025246]	-0.177414	0.884287	7.60761	-8.31914	5.34e-05	0.000576208	1.9762
42385	9605	C16orf7	chromosome 16 open reading frame 7	Hs.164410	ENSG00000075399	A_23_P129476	ref|Homo sapiens chromosome 16 open reading frame 7 (C16orf7), mRNA [NM_004913]	-0.177351	0.884325	7.98137	-7.83595	7.97e-05	0.000760852	1.5348
32983	259291	TAS2R45	taste receptor, type 2, member 45	Hs.287378	NA	A_23_P303851	ref|Homo sapiens taste receptor, type 2, member 45 (TAS2R45), mRNA [NM_176886]	-0.177283	0.884367	8.39887	-4.39783	0.00280499	0.0105891	-2.37552
29000	79591	C10orf76	chromosome 10 open reading frame 76	Hs.16004	ENSG00000120029	A_23_P86504	ref|Homo sapiens chromosome 10 open reading frame 76 (C10orf76), mRNA [NM_024541]	-0.177167	0.884438	8.47173	-7.58983	9.85e-05	0.00088219	1.30133
2427	144203	OVOS2	ovostatin 2	Hs.524331	NA	A_23_P25069	gb|Homo sapiens ovostatin 2, mRNA (cDNA clone IMAGE:4827636). [BC039117]	-0.177161	0.884442	7.33002	-6.82131	0.000198045	0.00146537	0.531541
34873	3281	HSBP1	heat shock factor binding protein 1	Hs.250899	ENSG00000230989	A_23_P100203	ref|Homo sapiens heat shock factor binding protein 1 (HSBP1), mRNA [NM_001537]	-0.177025	0.884525	8.61189	-8.43202	4.88e-05	0.000541258	2.07622
15727	55011	PIH1D1	PIH1 domain containing 1	Hs.5245	ENSG00000104872	A_23_P90155	ref|Homo sapiens PIH1 domain containing 1 (PIH1D1), mRNA [NM_017916]	-0.176862	0.884625	9.07247	-6.90599	0.000182852	0.00137817	0.619543
26488	3770	KCNJ14	potassium inwardly-rectifying channel, subfamily J, member 14	Hs.590945, Hs.644912	ENSG00000182324	A_23_P130764	ref|Homo sapiens potassium inwardly-rectifying channel, subfamily J, member 14 (KCNJ14), transcript variant 2, mRNA [NM_170720]	-0.176577	0.8848	9.17863	-8.20258	5.87e-05	0.000615261	1.87171
37722	1136	CHRNA3	cholinergic receptor, nicotinic, alpha 3	Hs.89605	ENSG00000080644	A_23_P253911	ref|Homo sapiens cholinergic receptor, nicotinic, alpha 3 (CHRNA3), mRNA [NM_000743]	-0.17655	0.884816	5.67453	-4.80173	0.00170735	0.00725561	-1.83479
35096	55657	ZNF692	zinc finger protein 692	Hs.377705	ENSG00000171163	A_23_P170978	ref|Homo sapiens zinc finger protein 692 (ZNF692), transcript variant 2, mRNA [NM_017865]	-0.176365	0.88493	10.5298	-4.78308	0.00174603	0.0073752	-1.85924
32753	9590	AKAP12	A kinase (PRKA) anchor protein 12	Hs.371240	ENSG00000131016	A_23_P214897	ref|Homo sapiens A kinase (PRKA) anchor protein 12 (AKAP12), transcript variant 2, mRNA [NM_144497]	-0.176359	0.884933	5.82802	-4.67352	0.0019936	0.00816386	-2.00388
41105	93492	TPTE2	transmembrane phosphoinositide 3-phosphatase and tensin homolog 2	Hs.377488	ENSG00000132958	A_24_P118052	ref|Homo sapiens transmembrane phosphoinositide 3-phosphatase and tensin homolog 2 (TPTE2), transcript variant 3, mRNA [NM_199254]	-0.17622	0.885019	4.87097	-6.36588	0.000308275	0.00201412	0.0438829
28685	93550	ANUBL1	AN1, ubiquitin-like, homolog (Xenopus laevis)	Hs.89029	ENSG00000172671	A_23_P1170	ref|Homo sapiens AN1, ubiquitin-like, homolog (Xenopus laevis) (ANUBL1), transcript variant 1, mRNA [NM_174890]	-0.176045	0.885126	5.63771	-6.34933	0.000313407	0.00203752	0.0256944
579	84881	RPUSD4	RNA pseudouridylate synthase domain containing 4	Hs.150458	ENSG00000165526	A_24_P318073	ref|Homo sapiens RNA pseudouridylate synthase domain containing 4 (RPUSD4), mRNA [NM_032795]	-0.175969	0.885173	8.34229	-6.75028	0.00021188	0.00153804	0.457101
42441	10526	IPO8	importin 8	Hs.505136	ENSG00000133704	A_23_P98923	ref|Homo sapiens importin 8 (IPO8), mRNA [NM_006390]	-0.175841	0.885251	6.62853	-4.4809	0.00252775	0.00975563	-2.26239
859	144132	DNHD1	dynein heavy chain domain 1	Hs.720080	ENSG00000179532	A_24_P943352	gb|Homo sapiens mRNA; cDNA DKFZp686J0796 (from clone DKFZp686J0796). [BX647806]	-0.175768	0.885296	5.0171	-4.65906	0.00202908	0.00827192	-2.02311
11518	840	CASP7	caspase 7, apoptosis-related cysteine peptidase	Hs.9216	ENSG00000165806	A_23_P12572	ref|Homo sapiens caspase 7, apoptosis-related cysteine peptidase (CASP7), transcript variant delta, mRNA [NM_033338]	-0.175745	0.88531	7.36545	-6.72515	0.000217032	0.00156026	0.430617
8487	26577	PCOLCE2	procollagen C-endopeptidase enhancer 2	Hs.8944	ENSG00000163710	A_23_P57709	ref|Homo sapiens procollagen C-endopeptidase enhancer 2 (PCOLCE2), mRNA [NM_013363]	-0.17547	0.885479	9.37156	-8.38892	5.05e-05	0.000553929	2.03817
36518	6917	TCEA1	transcription elongation factor A (SII), 1	Hs.491745	ENSG00000187735	A_23_P132444	ref|Homo sapiens transcription elongation factor A (SII), 1 (TCEA1), transcript variant 1, mRNA [NM_006756]	-0.17536	0.885546	11.2866	-7.93841	7.31e-05	0.000717458	1.63024
30763	146439	CCDC64B	coiled-coil domain containing 64B	Hs.513285	ENSG00000162069	A_24_P273647	gb|Homo sapiens mRNA; cDNA DKFZp666L166 (from clone DKFZp666L166). [AL833749]	-0.175317	0.885573	5.87896	-5.54849	0.000724737	0.00380261	-0.896398
16088	79609	METTL21D	methyltransferase like 21D	Hs.558541	ENSG00000100483	A_23_P128940	ref|Homo sapiens chromosome 14 open reading frame 138 (C14orf138), transcript variant 1, mRNA [NM_024558]	-0.175222	0.885631	9.72308	-8.29771	5.44e-05	0.000583679	1.95708
33498	51265	CDKL3	cyclin-dependent kinase-like 3	Hs.719926	ENSG00000006837	A_23_P110643	ref|Homo sapiens cyclin-dependent kinase-like 3 (CDKL3), transcript variant 2, mRNA [NM_016508]	-0.175173	0.885661	8.09831	-7.08842	0.000154354	0.00121798	0.806373
12060	79979	TRMT2B	TRM2 tRNA methyltransferase 2 homolog B (S. cerevisiae)	Hs.496501	ENSG00000188917	A_23_P73604	ref|Homo sapiens TRM2 tRNA methyltransferase 2 homolog B (S. cerevisiae) (TRMT2B), mRNA [NM_024917]	-0.175151	0.885675	6.72631	-7.972	7.11e-05	0.000704218	1.66132
18701	1145	CHRNE	cholinergic receptor, nicotinic, epsilon	Hs.654535	ENSG00000108556	A_23_P304279	ref|Homo sapiens cholinergic receptor, nicotinic, epsilon (CHRNE), mRNA [NM_000080]	-0.175061	0.88573	7.01546	-6.9139	0.000181502	0.00136951	0.627717
34952	51449	PCYOX1	prenylcysteine oxidase 1	Hs.567502	ENSG00000116005	A_23_P56640	ref|Homo sapiens prenylcysteine oxidase 1 (PCYOX1), mRNA [NM_016297]	-0.175039	0.885743	8.28004	-7.46114	0.000110316	0.000952634	1.17681
11486	26229	B3GAT3	beta-1,3-glucuronyltransferase 3 (glucuronosyltransferase I)	Hs.502759	ENSG00000149541	A_23_P36140	ref|Homo sapiens beta-1,3-glucuronyltransferase 3 (glucuronosyltransferase I) (B3GAT3), mRNA [NM_012200]	-0.174954	0.885795	8.58495	-4.82044	0.00166949	0.00713458	-1.81031
24364	23382	AHCYL2	adenosylhomocysteinase-like 2	Hs.600789	ENSG00000158467	A_24_P72518	ref|Homo sapiens S-adenosylhomocysteine hydrolase-like 2 (AHCYL2), transcript variant 1, mRNA [NM_015328]	-0.174946	0.885801	8.07479	-7.81829	8.09e-05	0.000769953	1.51825
1826	3155	HMGCL	3-hydroxymethyl-3-methylglutaryl-CoA lyase	Hs.533444	ENSG00000117305	A_23_P145	ref|Homo sapiens 3-hydroxymethyl-3-methylglutaryl-Coenzyme A lyase (HMGCL), mRNA [NM_000191]	-0.17494	0.885805	7.98866	-5.45775	0.00080102	0.00408669	-1.00625
37496	10443	N4BP2L2	NEDD4 binding protein 2-like 2	Hs.507680	ENSG00000244754	A_23_P53856	ref|Homo sapiens NEDD4 binding protein 2-like 2 (N4BP2L2), transcript variant 2, mRNA [NM_014887]	-0.174784	0.8859	11.4083	-8.19228	5.92e-05	0.000618867	1.86242
32078	4258	MGST2	microsomal glutathione S-transferase 2	Hs.81874	ENSG00000085871	A_23_P110167	ref|Homo sapiens microsomal glutathione S-transferase 2 (MGST2), mRNA [NM_002413]	-0.174729	0.885934	8.86222	-6.55557	0.000255679	0.00175507	0.249995
32051	127018	LYPLAL1	lysophospholipase-like 1	Hs.657617	ENSG00000143353	A_23_P86222	ref|Homo sapiens lysophospholipase-like 1 (LYPLAL1), mRNA [NM_138794]	-0.174691	0.885957	9.50411	-8.47674	4.71e-05	0.000528534	2.11553
29496	8065	CUL5	cullin 5	Hs.440320, Hs.701122	ENSG00000166266	A_23_P203009	ref|Homo sapiens cullin 5 (CUL5), mRNA [NM_003478]	-0.17464	0.885989	7.94596	-7.5086	0.000105799	0.000924668	1.22292
38629	56898	BDH2	3-hydroxybutyrate dehydrogenase, type 2	Hs.124696	ENSG00000164039	A_24_P80500	ref|Homo sapiens 3-hydroxybutyrate dehydrogenase, type 2 (BDH2), mRNA [NM_020139]	-0.174543	0.886048	5.05536	-7.98507	7.03e-05	0.000699004	1.67337
24425	79819	WDR78	WD repeat domain 78	Hs.49421	ENSG00000152763	A_24_P409013	ref|Homo sapiens WD repeat domain 78 (WDR78), transcript variant 1, mRNA [NM_024763]	-0.174512	0.886067	5.27246	-8.28609	5.49e-05	0.000587605	1.94669
42706	79937	CNTNAP3	contactin associated protein-like 3	Hs.521495, Hs.604441, Hs.658328	ENSG00000106714	A_24_P418203	ref|Homo sapiens contactin associated protein-like 3 (CNTNAP3), mRNA [NM_033655]	-0.174488	0.886082	7.73989	-7.35259	0.000121485	0.0010248	1.07045
41159	10232	MSLN	mesothelin	Hs.408488	ENSG00000102854	A_23_P77529	ref|Homo sapiens mesothelin (MSLN), transcript variant 1, mRNA [NM_005823]	-0.174445	0.886108	5.15183	-8.35781	5.18e-05	0.000563919	2.01059
17763	9654	TTLL4	tubulin tyrosine ligase-like family, member 4	Hs.471405	ENSG00000135912	A_23_P142697	ref|Homo sapiens tubulin tyrosine ligase-like family, member 4 (TTLL4), mRNA [NM_014640]	-0.174322	0.886184	7.03511	-7.9153	7.46e-05	0.000727269	1.6088
17553	1594	CYP27B1	cytochrome P450, family 27, subfamily B, polypeptide 1	Hs.524528	ENSG00000111012	A_23_P36397	ref|Homo sapiens cytochrome P450, family 27, subfamily B, polypeptide 1 (CYP27B1), nuclear gene encoding mitochondrial protein, mRNA [NM_000785]	-0.174079	0.886333	6.19732	-6.75832	0.000210262	0.00152974	0.465549
146	55521	TRIM36	tripartite motif containing 36	Hs.519514, Hs.638953	ENSG00000152503	A_24_P363134	ref|Homo sapiens tripartite motif-containing 36 (TRIM36), transcript variant 1, mRNA [NM_018700]	-0.173647	0.886599	5.54442	-4.78567	0.0017406	0.00735657	-1.85584
13883	55311	ZNF444	zinc finger protein 444	Hs.24545	ENSG00000167685	A_23_P27767	ref|Homo sapiens zinc finger protein 444 (ZNF444), mRNA [NM_018337]	-0.173528	0.886672	10.7643	-8.35762	5.18e-05	0.000563919	2.01042
41829	129530	LYG1	lysozyme G-like 1	Hs.164589	ENSG00000144214	A_23_P165707	ref|Homo sapiens lysozyme G-like 1 (LYG1), mRNA [NM_174898]	-0.173522	0.886675	6.56134	-7.60568	9.72e-05	0.000874287	1.31654
5422	440556	FLJ42875	hypothetical LOC440556	Hs.531041	NA	A_24_P366787	ref|Homo sapiens hypothetical LOC440556 (FLJ42875), transcript variant 2, non-coding RNA [NR_024371]	-0.1734	0.88675	6.86109	-6.58156	0.000249284	0.00172483	0.277906
37459	162073	ITPRIPL2	inositol 1,4,5-trisphosphate receptor interacting protein-like 2	Hs.530899	ENSG00000205730	A_24_P315306	ref|Homo sapiens inositol 1,4,5-triphosphate receptor interacting protein-like 2 (ITPRIPL2), mRNA [NM_001034841]	-0.173315	0.886802	6.67707	-6.79587	0.000202881	0.00148979	0.504946
41787	10290	SPEG	SPEG complex locus	Hs.21639	ENSG00000072195	A_23_P338919	gb|Homo sapiens cDNA FLJ30825 fis, clone FEBRA2001706, highly similar to Human APEG-1 mRNA. [AK055387]	-0.173303	0.88681	8.93066	-5.13797	0.00114982	0.00537166	-1.40252
41413	644192	LOC644192	hypothetical LOC644192	Hs.58690	NA	A_24_P795371	gb|Homo sapiens cDNA FLJ10010 fis, clone HEMBA1000302. [AK000872]	-0.173107	0.886931	6.66847	-4.74071	0.00183753	0.00766171	-1.91498
32027	51171	HSD17B14	hydroxysteroid (17-beta) dehydrogenase 14	Hs.18788	ENSG00000087076	A_23_P78762	ref|Homo sapiens hydroxysteroid (17-beta) dehydrogenase 14 (HSD17B14), mRNA [NM_016246]	-0.172878	0.887071	5.96968	-6.0167	0.000439742	0.00260827	-0.347186
7496	54916	C14orf101	chromosome 14 open reading frame 101	Hs.497253	ENSG00000070269	A_23_P205607	ref|Homo sapiens chromosome 14 open reading frame 101 (C14orf101), mRNA [NM_017799]	-0.172575	0.887258	8.45224	-6.45572	0.000281994	0.00188516	0.142048
28256	131965	METTL6	methyltransferase like 6	Hs.149487	ENSG00000206562	A_23_P361469	ref|Homo sapiens methyltransferase like 6 (METTL6), mRNA [NM_152396]	-0.172332	0.887407	7.87796	-7.13126	0.000148405	0.00118419	0.84971
4723	5189	PEX1	peroxisomal biogenesis factor 1	Hs.164682	ENSG00000127980	A_23_P20045	ref|Homo sapiens peroxisomal biogenesis factor 1 (PEX1), mRNA [NM_000466]	-0.17229	0.887433	8.33907	-7.53899	0.000103014	0.000907832	1.25234
20915	125919	ZNF543	zinc finger protein 543	Hs.202544	ENSG00000178229	A_24_P913119	gb|Homo sapiens clone L2-6 zinc finger protein mRNA, partial cds. [AF024696]	-0.172217	0.887478	5.98051	-5.61201	0.000676143	0.00360582	-0.820179
33420	155382	VPS37D	vacuolar protein sorting 37 homolog D (S. cerevisiae)	Hs.647037	ENSG00000176428	A_23_P409417	ref|Homo sapiens vacuolar protein sorting 37 homolog D (S. cerevisiae) (VPS37D), mRNA [NM_001077621]	-0.171973	0.887628	7.14778	-4.92779	0.0014694	0.00646827	-1.67083
36693	84984	CEP19	centrosomal protein 19kDa	Hs.282800	ENSG00000174007	A_32_P212058	ref|Homo sapiens chromosome 3 open reading frame 34 (C3orf34), mRNA [NM_032898]	-0.17193	0.887654	5.92409	-5.75766	0.000577782	0.00319056	-0.647439
9110	221079	ARL5B	ADP-ribosylation factor-like 5B	Hs.25362	ENSG00000165997	A_24_P943997	ref|Homo sapiens ADP-ribosylation factor-like 5B (ARL5B), mRNA [NM_178815]	-0.171866	0.887694	6.5161	-7.5071	0.000105938	0.000925514	1.22147
23272	8237	USP11	ubiquitin specific peptidase 11	Hs.171501	ENSG00000102226	A_23_P171366	ref|Homo sapiens ubiquitin specific peptidase 11 (USP11), mRNA [NM_004651]	-0.171758	0.887761	10.0679	-7.87424	7.72e-05	0.000744547	1.57058
23073	50626	CYHR1	cysteine/histidine-rich 1	Hs.459379	ENSG00000187954	A_24_P89843	ref|Homo sapiens cysteine/histidine-rich 1 (CYHR1), transcript variant 2, mRNA [NM_032687]	-0.171713	0.887788	8.79779	-4.60747	0.00216134	0.00867658	-2.09193
28333	8209	C21orf33	chromosome 21 open reading frame 33	Hs.413482	ENSG00000160221	A_23_P109333	ref|Homo sapiens chromosome 21 open reading frame 33 (C21orf33), nuclear gene encoding mitochondrial protein, transcript variant 1, mRNA [NM_004649]	-0.171655	0.887824	11.2505	-5.5104	0.000755738	0.00391975	-0.942384
7045	27120	DKKL1	dickkopf-like 1	Hs.515855	ENSG00000104901	A_23_P130743	ref|Homo sapiens dickkopf-like 1 (soggy) (DKKL1), mRNA [NM_014419]	-0.171627	0.887841	5.95797	-6.29112	0.000332235	0.0021274	-0.03856
37275	22979	EFR3B	EFR3 homolog B (S. cerevisiae)	Hs.4892	ENSG00000084710	A_32_P83049	ref|Homo sapiens EFR3 homolog B (S. cerevisiae) (EFR3B), mRNA [NM_014971]	-0.171566	0.887878	7.03872	-7.05638	0.000158976	0.0012445	0.773831
15660	343990	C2orf55	chromosome 2 open reading frame 55	Hs.469398	ENSG00000196872	A_24_P272313	ref|Homo sapiens chromosome 2 open reading frame 55 (C2orf55), mRNA [NM_207362]	-0.171515	0.88791	5.16002	-6.71127	0.000219936	0.00157529	0.415963
28565	26013	L3MBTL1	l(3)mbt-like 1 (Drosophila)	Hs.709356	ENSG00000185513	A_24_P393389	gb|Homo sapiens mRNA for KIAA0681 protein, partial cds. [AB014581]	-0.171437	0.887958	6.49187	-6.9777	0.000171002	0.00131351	0.693424
6470	440	ASNS	asparagine synthetase (glutamine-hydrolyzing)	Hs.489207	ENSG00000070669	A_23_P145694	ref|Homo sapiens asparagine synthetase (ASNS), transcript variant 2, mRNA [NM_001673]	-0.171397	0.887983	11.6616	-8.31985	5.34e-05	0.00057602	1.97683
26827	9731	CEP104	centrosomal protein 104kDa	Hs.133089, Hs.509017	ENSG00000116198	A_24_P295877	ref|Homo sapiens KIAA0562 (KIAA0562), mRNA [NM_014704]	-0.171379	0.887993	7.15148	-6.39528	0.000299386	0.00196701	0.0761118
9017	84080	C16orf48	chromosome 16 open reading frame 48	Hs.729159	ENSG00000124074	A_23_P14975	ref|Homo sapiens chromosome 16 open reading frame 48 (C16orf48), mRNA [NM_032140]	-0.171348	0.888013	9.56719	-5.35713	0.000896172	0.00445478	-1.1294
31380	10020	GNE	glucosamine (UDP-N-acetyl)-2-epimerase/N-acetylmannosamine kinase	Hs.5920	ENSG00000159921	A_23_P216489	ref|Homo sapiens glucosamine (UDP-N-acetyl)-2-epimerase/N-acetylmannosamine kinase (GNE), transcript variant 2, mRNA [NM_005476]	-0.171326	0.888026	11.7121	-7.38351	0.000118179	0.00100316	1.10088
26426	5394	EXOSC10	exosome component 10	Hs.632368	ENSG00000171824	A_23_P62868	ref|Homo sapiens exosome component 10 (EXOSC10), transcript variant 1, mRNA [NM_001001998]	-0.171064	0.888188	10.9308	-7.13827	0.000147456	0.00117984	0.856789
2351	11187	PKP3	plakophilin 3	Hs.534395	ENSG00000184363	A_23_P95810	ref|Homo sapiens plakophilin 3 (PKP3), mRNA [NM_007183]	-0.170952	0.888257	11.1665	-7.84261	7.93e-05	0.000757689	1.54104
40540	23256	SCFD1	sec1 family domain containing 1	Hs.369168	ENSG00000092108	A_23_P88209	ref|Homo sapiens sec1 family domain containing 1 (SCFD1), transcript variant 1, mRNA [NM_016106]	-0.17085	0.888319	9.33913	-5.49544	0.000768306	0.00396169	-0.960489
17466	114822	RHPN1	rhophilin, Rho GTPase binding protein 1	Hs.521912	ENSG00000158106	A_23_P315386	ref|Homo sapiens rhophilin, Rho GTPase binding protein 1 (RHPN1), mRNA [NM_052924]	-0.170769	0.888369	8.78935	-5.87922	0.000507779	0.0028972	-0.505441
639	23321	TRIM2	tripartite motif containing 2	Hs.435711	ENSG00000109654	A_24_P208909	ref|Homo sapiens tripartite motif-containing 2 (TRIM2), transcript variant 1, mRNA [NM_015271]	-0.170701	0.888411	5.28394	-5.45378	0.000804558	0.00410185	-1.01109
38371	196968	DNM1P46	DNM1 pseudogene 46	Hs.567763, Hs.585319	NA	A_24_P110141	ref|Homo sapiens chromosome 15 open reading frame 51 (C15orf51), non-coding RNA [NR_003260]	-0.170611	0.888466	6.11059	-7.51468	0.000105235	0.000921363	1.22882
37208	54981	C9orf95	chromosome 9 open reading frame 95	Hs.494186	ENSG00000106733	A_23_P32036	ref|Homo sapiens chromosome 9 open reading frame 95 (C9orf95), transcript variant 1, mRNA [NM_017881]	-0.17044	0.888572	6.18405	-5.41171	0.000843097	0.00425213	-1.06243
4953	5590	PRKCZ	protein kinase C, zeta	Hs.496255	ENSG00000067606	A_23_P51187	ref|Homo sapiens protein kinase C, zeta (PRKCZ), transcript variant 1, mRNA [NM_002744]	-0.170399	0.888597	11.4949	-6.9431	0.000176609	0.0013442	0.657847
1206	925	CD8A	CD8a molecule	Hs.85258	ENSG00000153563	A_32_P163247	ref|Homo sapiens CD8a molecule (CD8A), transcript variant 1, mRNA [NM_001768]	-0.170234	0.888699	6.1221	-6.13372	0.000389767	0.00239266	-0.214411
24456	6897	TARS	threonyl-tRNA synthetase	Hs.481860	ENSG00000113407	A_23_P70168	ref|Homo sapiens threonyl-tRNA synthetase (TARS), mRNA [NM_152295]	-0.170022	0.888829	11.3526	-6.81226	0.000199749	0.0014744	0.522095
2108	11145	PLA2G16	phospholipase A2, group XVI	Hs.502775	ENSG00000176485	A_23_P116414	ref|Homo sapiens phospholipase A2, group XVI (PLA2G16), transcript variant 1, mRNA [NM_007069]	-0.170017	0.888832	10.2522	-5.19652	0.00107506	0.00509747	-1.32889
2199	64776	C11orf1	chromosome 11 open reading frame 1	Hs.17546	ENSG00000137720	A_23_P150350	ref|Homo sapiens chromosome 11 open reading frame 1 (C11orf1), mRNA [NM_022761]	-0.169979	0.888856	7.44712	-6.65056	0.000233162	0.00164023	0.351594
35167	5526	PPP2R5B	protein phosphatase 2, regulatory subunit B', beta	Hs.75199	ENSG00000068971	A_23_P35796	ref|Homo sapiens protein phosphatase 2, regulatory subunit B', beta isoform (PPP2R5B), mRNA [NM_006244]	-0.169951	0.888873	7.89945	-3.64769	0.00752083	0.0230629	-3.44022
2404	57699	CPNE5	copine V	Hs.657869	ENSG00000124772	A_23_P360804	ref|Homo sapiens copine V (CPNE5), mRNA [NM_020939]	-0.169837	0.888943	5.66698	-5.67047	0.000634587	0.00343772	-0.750498
14297	3623	INHA	inhibin, alpha	Hs.407506	ENSG00000123999	A_23_P51039	ref|Homo sapiens inhibin, alpha (INHA), mRNA [NM_002191]	-0.169826	0.88895	6.12435	-6.48181	0.000274838	0.00184942	0.170368
9551	23129	PLXND1	plexin D1	Hs.301685	ENSG00000004399	A_23_P80752	ref|Homo sapiens plexin D1 (PLXND1), mRNA [NM_015103]	-0.169814	0.888957	7.31185	-6.41743	0.000292876	0.00193626	0.100333
41370	284367	SIGLECP3	sialic acid binding Ig-like lectin, pseudogene 3	Hs.132045	NA	A_32_P128258	ref|Homo sapiens sialic acid binding Ig-like lectin, pseudogene 3 (SIGLECP3), non-coding RNA [NR_002804]	-0.169786	0.888975	4.877	-6.58791	0.000247751	0.00171749	0.284707
2238	4051	CYP4F3	cytochrome P450, family 4, subfamily F, polypeptide 3	Hs.106242	ENSG00000186529, ENSG00000186115	A_23_P209116	gb|Homo sapiens mRNA for leukotriene B4 omega-hydroxylase, complete cds. [AB002454]	-0.169715	0.889019	4.82584	-3.99404	0.00472035	0.0159961	-2.93925
15307	79695	GALNT12	UDP-N-acetyl-alpha-D-galactosamine:polypeptide N-acetylgalactosaminyltransferase 12 (GalNAc-T12)	Hs.47099	ENSG00000119514	A_23_P415652	ref|Homo sapiens UDP-N-acetyl-alpha-D-galactosamine:polypeptide N-acetylgalactosaminyltransferase 12 (GalNAc-T12) (GALNT12), mRNA [NM_024642]	-0.169708	0.889023	6.48046	-5.89378	0.000500047	0.00286564	-0.488566
17219	3840	KPNA4	karyopherin alpha 4 (importin alpha 3)	Hs.467866	ENSG00000186432	A_32_P3127	gb|Homo sapiens clone 23728 mRNA sequence. [AF038199]	-0.169588	0.889097	7.02728	-7.28049	0.000129601	0.00107244	0.999125
23115	142937	LOC142937	hypothetical protein BC008131	Hs.679824	NA	A_23_P402164	gb|Homo sapiens cDNA clone IMAGE:3454038. [BC008131]	-0.169355	0.88924	7.30097	-6.57095	0.000251874	0.00173859	0.266516
24973	6621	SNAPC4	small nuclear RNA activating complex, polypeptide 4, 190kDa	Hs.113265	ENSG00000165684	A_23_P20728	ref|Homo sapiens small nuclear RNA activating complex, polypeptide 4, 190kDa (SNAPC4), mRNA [NM_003086]	-0.169047	0.88943	9.35997	-5.9653	0.000463916	0.00271563	-0.406068
41099	54902	TTC19	tetratricopeptide repeat domain 19	Hs.462316	ENSG00000011295	A_24_P126393	ref|Homo sapiens tetratricopeptide repeat domain 19 (TTC19), mRNA [NM_017775]	-0.168903	0.889519	7.91372	-5.8719	0.000511718	0.00291481	-0.513939
22772	541466	CT45A1	cancer/testis antigen family 45, member A1	Hs.460937	ENSG00000232478	A_32_P780817	ref|Homo sapiens cancer/testis antigen CT45-1 (CT45-1), mRNA [NM_001017417]	-0.168768	0.889602	4.86476	-5.11031	0.00118711	0.00550555	-1.43746
5005	6045	RNF2	ring finger protein 2	Hs.591490	ENSG00000121481	A_23_P85543	ref|Homo sapiens ring finger protein 2 (RNF2), mRNA [NM_007212]	-0.168731	0.889625	7.09008	-4.97897	0.00138342	0.00617739	-1.60491
41339	8689	KRT36	keratin 36	Hs.248189	ENSG00000126337	A_23_P55400	ref|Homo sapiens keratin 36 (KRT36), mRNA [NM_003771]	-0.168644	0.889679	4.96926	-2.86525	0.0228962	0.0549033	-4.61843
35711	23288	IQCE	IQ motif containing E	Hs.520627	ENSG00000106012	A_23_P19852	ref|Homo sapiens IQ motif containing E (IQCE), transcript variant 1, mRNA [NM_152558]	-0.168565	0.889727	9.4031	-4.61766	0.00213448	0.0085894	-2.0783
42702	389610	XKR5	XK, Kell blood group complex subunit-related family, member 5	Hs.558840	NA	A_32_P233877	ref|Homo sapiens XK, Kell blood group complex subunit-related family, member 5 (XKR5), mRNA [NM_207411]	-0.16856	0.88973	4.84768	-5.28826	0.000968493	0.00471869	-1.21449
7462	147111	NOTUM	notum pectinacetylesterase homolog (Drosophila)	Hs.106137	ENSG00000185269	A_23_P101007	ref|Homo sapiens notum pectinacetylesterase homolog (Drosophila) (NOTUM), mRNA [NM_178493]	-0.168554	0.889734	6.46739	-5.27669	0.000981265	0.0047626	-1.22885
36041	399687	MYO18A	myosin XVIIIA	Hs.462590	ENSG00000196535	A_23_P78122	ref|Homo sapiens myosin XVIIIA (MYO18A), transcript variant 1, mRNA [NM_078471]	-0.168502	0.889766	9.20819	-4.10435	0.00408479	0.0142647	-2.783
9307	4646	MYO6	myosin VI	Hs.149387	ENSG00000196586	A_23_P255952	ref|Homo sapiens myosin VI (MYO6), mRNA [NM_004999]	-0.168333	0.88987	8.75465	-6.72137	0.000217819	0.001564	0.426627
23110	27094	KCNMB3	potassium large conductance calcium-activated channel, subfamily M beta member 3	Hs.591285	ENSG00000171121	A_24_P251661	ref|Homo sapiens potassium large conductance calcium-activated channel, subfamily M beta member 3 (KCNMB3), transcript variant 1, mRNA [NM_171828]	-0.168304	0.889888	7.41387	-6.2239	0.000355559	0.00223519	-0.113278
6188	9869	SETDB1	SET domain, bifurcated 1	Hs.643565	ENSG00000143379	A_23_P126398	ref|Homo sapiens SET domain, bifurcated 1 (SETDB1), mRNA [NM_012432]	-0.168276	0.889905	7.86174	-3.91124	0.0052679	0.0174019	-3.05762
9779	7073	TIAL1	TIA1 cytotoxic granule-associated RNA binding protein-like 1	Hs.501203	ENSG00000151923	A_23_P161488	ref|Homo sapiens TIA1 cytotoxic granule-associated RNA binding protein-like 1 (TIAL1), transcript variant 2, mRNA [NM_001033925]	-0.168201	0.889951	10.0498	-7.72978	8.73e-05	0.000810551	1.43483
38935	26140	TTLL3	tubulin tyrosine ligase-like family, member 3	Hs.323342	ENSG00000214021	A_24_P917492	gb|Homo sapiens tubulin tyrosine ligase-like family, member 3, mRNA (cDNA clone IMAGE:3841498), with apparent retained intron. [BC009479]	-0.168034	0.890055	7.1988	-7.45804	0.000110619	0.000954486	1.17379
23605	57661	PHRF1	PHD and ring finger domains 1	Hs.325838	ENSG00000070047	A_23_P75391	ref|Homo sapiens PHD and ring finger domains 1 (PHRF1), mRNA [NM_020901]	-0.168006	0.890072	8.26446	-5.41263	0.000842235	0.00424849	-1.06131
32911	7551	ZNF3	zinc finger protein 3	Hs.435302	ENSG00000166526	A_23_P219084	ref|Homo sapiens zinc finger protein 3 (ZNF3), transcript variant 2, mRNA [NM_032924]	-0.167852	0.890167	8.62809	-4.87648	0.00156153	0.0067762	-1.73729
26242	81566	CSRNP2	cysteine-serine-rich nuclear protein 2	Hs.524425	ENSG00000110925	A_23_P151209	ref|Homo sapiens cysteine-serine-rich nuclear protein 2 (CSRNP2), mRNA [NM_030809]	-0.167589	0.890329	7.75047	-6.59087	0.00024704	0.00171473	0.287876
2508	286343	C9orf150	chromosome 9 open reading frame 150	Hs.445356	ENSG00000153714	A_23_P83007	ref|Homo sapiens chromosome 9 open reading frame 150 (C9orf150), mRNA [NM_203403]	-0.167574	0.890339	8.75363	-7.56404	0.000100781	0.000895135	1.27651
10446	23169	SLC35D1	solute carrier family 35 (UDP-glucuronic acid/UDP-N-acetylgalactosamine dual transporter), member D1	Hs.213642	ENSG00000116704	A_23_P357929	ref|Homo sapiens solute carrier family 35 (UDP-glucuronic acid/UDP-N-acetylgalactosamine dual transporter), member D1 (SLC35D1), mRNA [NM_015139]	-0.167541	0.890359	6.78551	-7.29876	0.000127489	0.00106222	1.01725
4072	2287	FKBP3	FK506 binding protein 3, 25kDa	Hs.509226	ENSG00000100442	A_23_P117558	ref|Homo sapiens FK506 binding protein 3, 25kDa (FKBP3), mRNA [NM_002013]	-0.167327	0.890491	11.2563	-7.9419	7.29e-05	0.000716338	1.63347
16983	221527	ZBTB12	zinc finger and BTB domain containing 12	Hs.234027	ENSG00000204366, ENSG00000237900, ENSG00000234852, ENSG00000206366, ENSG00000234196	A_23_P111155	ref|Homo sapiens zinc finger and BTB domain containing 12 (ZBTB12), mRNA [NM_181842]	-0.167305	0.890505	7.04868	-6.03188	0.000432876	0.00257847	-0.32987
496	57504	MTA3	metastasis associated 1 family, member 3	Hs.435413	ENSG00000057935	A_23_P154522	ref|Homo sapiens metastasis associated 1 family, member 3 (MTA3), mRNA [NM_020744]	-0.167259	0.890533	8.59609	-7.76256	8.49e-05	0.000794819	1.46581
17267	259296	TAS2R50	taste receptor, type 2, member 50	Hs.688194	ENSG00000212126	A_23_P347029	ref|Homo sapiens taste receptor, type 2, member 50 (TAS2R50), mRNA [NM_176890]	-0.167207	0.890565	7.48519	-7.3882	0.000117687	0.000999766	1.10548
31731	8872	CDC123	cell division cycle 123 homolog (S. cerevisiae)	Hs.412842	ENSG00000151465	A_24_P303974	ref|Homo sapiens cell division cycle 123 homolog (S. cerevisiae) (CDC123), mRNA [NM_006023]	-0.167205	0.890566	9.81486	-7.51041	0.00010563	0.000923677	1.22468
15133	100133130	LOC100133130	PRO1102	Hs.729422	NA	A_23_P377411	gb|Homo sapiens clone FLB4246 PRO1102 mRNA, complete cds. [AF130105]	-0.16715	0.8906	7.41808	-5.43303	0.000823312	0.00417099	-1.03638
40441	22818	COPZ1	coatomer protein complex, subunit zeta 1	Hs.505652	ENSG00000111481	A_24_P389959	ref|Homo sapiens coatomer protein complex, subunit zeta 1 (COPZ1), mRNA [NM_016057]	-0.167066	0.890652	9.13235	-5.07311	0.00123939	0.00568467	-1.48464
10992	25992	SNED1	sushi, nidogen and EGF-like domains 1	Hs.471834	ENSG00000162804	A_24_P409071	ref|Homo sapiens sushi, nidogen and EGF-like domains 1 (SNED1), mRNA [NM_001080437]	-0.166807	0.890812	8.17048	-7.58346	9.91e-05	0.00088582	1.29521
28552	55227	LRRC1	leucine rich repeat containing 1	Hs.606493, Hs.646997	ENSG00000137269	A_23_P215024	ref|Homo sapiens leucine rich repeat containing 1 (LRRC1), mRNA [NM_018214]	-0.166786	0.890825	5.79822	-5.9321	0.000480313	0.00278605	-0.444278
37145	57189	KIAA1147	KIAA1147	Hs.521240	ENSG00000257093, ENSG00000127359	A_23_P404821	ref|Homo sapiens KIAA1147 (KIAA1147), mRNA [NM_001080392]	-0.166771	0.890834	6.57235	-3.57238	0.00834175	0.0250257	-3.55111
674	340120	ANKRD34B	ankyrin repeat domain 34B	Hs.519404	ENSG00000189127	A_24_P916073	ref|Homo sapiens ankyrin repeat domain 34B (ANKRD34B), mRNA [NM_001004441]	-0.166556	0.890967	5.25502	-5.96741	0.000462899	0.00271114	-0.403652
16363	9557	CHD1L	chromodomain helicase DNA binding protein 1-like	Hs.191164	ENSG00000131778	A_23_P45831	ref|Homo sapiens chromodomain helicase DNA binding protein 1-like (CHD1L), mRNA [NM_004284]	-0.166503	0.891	9.40745	-7.77038	8.43e-05	0.000791309	1.47318
30082	64599	GIGYF1	GRB10 interacting GYF protein 1	Hs.414396	ENSG00000146830	A_24_P231173	ref|Homo sapiens GRB10 interacting GYF protein 1 (GIGYF1), mRNA [NM_022574]	-0.166439	0.89104	8.09051	-6.03677	0.000430689	0.00256827	-0.324296
6138	160492	IFLTD1	intermediate filament tail domain containing 1	Hs.44647	ENSG00000152936	A_23_P311050	ref|Homo sapiens intermediate filament tail domain containing 1 (IFLTD1), mRNA [NM_152590]	-0.166415	0.891054	5.90762	-5.10631	0.00119262	0.00552282	-1.44253
37257	6540	SLC6A13	solute carrier family 6 (neurotransmitter transporter, GABA), member 13	Hs.504398	ENSG00000010379	A_23_P64980	ref|Homo sapiens solute carrier family 6 (neurotransmitter transporter, GABA), member 13 (SLC6A13), mRNA [NM_016615]	-0.1664	0.891063	5.13022	-4.57992	0.00223584	0.00889416	-2.12884
16696	4335	MNT	MAX binding protein	Hs.626579, Hs.632239	ENSG00000070444	A_23_P341443	ref|Homo sapiens MAX binding protein (MNT), mRNA [NM_020310]	-0.166389	0.89107	8.13178	-6.20761	0.000361483	0.00226387	-0.131474
40242	57573	ZNF471	zinc finger protein 471	Hs.710590	ENSG00000196263	A_23_P417684	gb|Homo sapiens mRNA for KIAA1396 protein, partial cds. [AB037817]	-0.166372	0.891081	5.37314	-5.88743	0.000503406	0.00287805	-0.49593
9924	88455	ANKRD13A	ankyrin repeat domain 13A	Hs.528703	ENSG00000076513	A_24_P98975	ref|Homo sapiens ankyrin repeat domain 13A (ANKRD13A), mRNA [NM_033121]	-0.166197	0.891189	7.52464	-6.59943	0.000244993	0.00170438	0.297042
43010	23108	RAP1GAP2	RAP1 GTPase activating protein 2	Hs.499659	ENSG00000132359	A_23_P412214	ref|Homo sapiens GTPase activating Rap/RanGAP domain-like 4 (GARNL4), transcript variant 1, mRNA [NM_015085]	-0.166186	0.891196	5.82563	-5.91892	0.000487002	0.00281243	-0.45949
9787	51130	ASB3	ankyrin repeat and SOCS box containing 3	Hs.40763	ENSG00000115239	A_23_P56833	ref|Homo sapiens ankyrin repeat and SOCS box-containing 3 (ASB3), transcript variant 1, mRNA [NM_016115]	-0.166115	0.89124	9.0528	-6.79061	0.000203898	0.00149483	0.499434
8554	8787	RGS9	regulator of G-protein signaling 9	Hs.664380	ENSG00000108370	A_23_P66881	ref|Homo sapiens regulator of G-protein signaling 9 (RGS9), transcript variant 1, mRNA [NM_003835]	-0.166093	0.891253	5.18356	-5.32363	0.000930577	0.00458334	-1.17071
2086	23181	DIP2A	DIP2 disco-interacting protein 2 homolog A (Drosophila)	Hs.189585	ENSG00000160305	A_24_P7179	ref|Homo sapiens DIP2 disco-interacting protein 2 homolog A (Drosophila) (DIP2A), transcript variant 3, mRNA [NM_206890]	-0.16609	0.891255	7.57007	-5.79888	0.000552912	0.00308782	-0.599074
40395	441024	MTHFD2L	methylenetetrahydrofolate dehydrogenase (NADP+ dependent) 2-like	Hs.479954, Hs.721011	ENSG00000163738	A_24_P307314	gb|Homo sapiens methylenetetrahydrofolate dehydrogenase (NADP+ dependent) 2-like, mRNA (cDNA clone IMAGE:4794959), complete cds. [BC037529]	-0.166035	0.891289	6.49407	-7.5172	0.000105002	0.000920115	1.23126
36058	146336	LOC146336	hypothetical LOC146336	Hs.250557	NA	A_32_P399187	gb|Homo sapiens cDNA FLJ32252 fis, clone PROST1000167, weakly similar to SYNAPSIN I. [AK056814]	-0.166021	0.891298	4.86079	-5.80124	0.000551521	0.00308243	-0.596304
869	55422	ZNF331	zinc finger protein 331	Hs.185674	ENSG00000130844	A_23_P50376	ref|Homo sapiens zinc finger protein 331 (ZNF331), transcript variant 1, mRNA [NM_018555]	-0.165751	0.891464	7.42362	-3.79078	0.00619099	0.019766	-3.2314
25440	161582	DYX1C1	dyslexia susceptibility 1 candidate 1	Hs.126403	ENSG00000256061	A_23_P37505	ref|Homo sapiens dyslexia susceptibility 1 candidate 1 (DYX1C1), transcript variant 1, mRNA [NM_130810]	-0.165686	0.891505	5.98349	-7.12542	0.000149201	0.001189	0.843815
14151	246329	STAC3	SH3 and cysteine rich domain 3	Hs.417595	ENSG00000185482	A_23_P10947	ref|Homo sapiens SH3 and cysteine rich domain 3 (STAC3), mRNA [NM_145064]	-0.165664	0.891518	5.52508	-5.60712	0.00067975	0.00361999	-0.826023
1110	1366	CLDN7	claudin 7	Hs.513915	ENSG00000181885	A_23_P164284	ref|Homo sapiens claudin 7 (CLDN7), mRNA [NM_001307]	-0.165657	0.891522	5.2076	-5.54363	0.000728613	0.00381695	-0.902255
10085	151188	ARL6IP6	ADP-ribosylation-like factor 6 interacting protein 6	Hs.516468, Hs.643580	ENSG00000177917	A_23_P28169	ref|Homo sapiens ADP-ribosylation-like factor 6 interacting protein 6 (ARL6IP6), transcript variant 1, mRNA [NM_152522]	-0.165583	0.891568	9.3078	-7.47856	0.000108633	0.000941858	1.19376
32432	4038	LRP4	low density lipoprotein receptor-related protein 4	Hs.4930	ENSG00000134569	A_24_P403561	ref|Homo sapiens low density lipoprotein receptor-related protein 4 (LRP4), mRNA [NM_002334]	-0.165353	0.891711	8.38595	-6.26219	0.000342057	0.00217236	-0.0706472
6675	80864	EGFL8	EGF-like-domain, multiple 8	Hs.332138	###############################################################################################################################################################################################################################################################	A_23_P168105	ref|Homo sapiens EGF-like-domain, multiple 8 (EGFL8), mRNA [NM_030652]	-0.16535	0.891712	6.56098	-4.67319	0.00199441	0.00816435	-2.00433
19450	9112	MTA1	metastasis associated 1	Hs.525629	ENSG00000182979	A_24_P241370	ref|Homo sapiens metastasis associated 1 (MTA1), mRNA [NM_004689]	-0.165328	0.891726	8.73301	-6.72593	0.00021687	0.00155976	0.431442
38220	63941	NECAB3	N-terminal EF-hand calcium binding protein 3	Hs.516986	ENSG00000125967	A_23_P68628	ref|Homo sapiens N-terminal EF-hand calcium binding protein 3 (NECAB3), transcript variant 2, mRNA [NM_031232]	-0.165204	0.891802	7.95599	-4.0913	0.00415492	0.0144572	-2.80141
26788	81031	SLC2A10	solute carrier family 2 (facilitated glucose transporter), member 10	Hs.305971	ENSG00000197496	A_23_P210521	ref|Homo sapiens solute carrier family 2 (facilitated glucose transporter), member 10 (SLC2A10), mRNA [NM_030777]	-0.165	0.891928	5.54076	-3.81909	0.0059593	0.019173	-3.19039
26797	54961	SSH3	slingshot homolog 3 (Drosophila)	Hs.29173	ENSG00000172830	A_23_P150147	ref|Homo sapiens slingshot homolog 3 (Drosophila) (SSH3), mRNA [NM_017857]	-0.164921	0.891977	7.43642	-7.79756	8.24e-05	0.000779703	1.49878
39954	11013	TMSB15A	thymosin beta 15a	Hs.56145	ENSG00000158164	A_23_P137173	ref|Homo sapiens thymosin-like 8 (TMSL8), mRNA [NM_021992]	-0.164822	0.892038	4.89296	-4.44354	0.00264852	0.0101244	-2.31314
18767	1649	DDIT3	DNA-damage-inducible transcript 3	Hs.505777	ENSG00000175197	A_23_P21134	ref|Homo sapiens DNA-damage-inducible transcript 3 (DDIT3), mRNA [NM_004083]	-0.164723	0.8921	6.23374	-4.54832	0.00232478	0.00914978	-2.17131
38264	137075	CLDN23	claudin 23	Hs.183617	ENSG00000253958	A_23_P134854	ref|Homo sapiens claudin 23 (CLDN23), mRNA [NM_194284]	-0.164633	0.892155	6.43765	-6.467	0.000278876	0.00186877	0.154299
34983	6274	S100A3	S100 calcium binding protein A3	Hs.557609	ENSG00000188015	A_23_P104073	ref|Homo sapiens S100 calcium binding protein A3 (S100A3), mRNA [NM_002960]	-0.164631	0.892157	7.53643	-7.15509	0.000145207	0.00116617	0.873735
32967	8506	CNTNAP1	contactin associated protein 1	Hs.408730	ENSG00000108797	A_23_P411113	ref|Homo sapiens contactin associated protein 1 (CNTNAP1), mRNA [NM_003632]	-0.164546	0.892209	8.65989	-7.4804	0.000108457	0.000941452	1.19556
21177	155061	ZNF746	zinc finger protein 746	Hs.24643	ENSG00000181220	A_24_P206344	ref|Homo sapiens zinc finger protein 746 (ZNF746), mRNA [NM_152557]	-0.164504	0.892235	9.26998	-6.29201	0.000331938	0.00212613	-0.0375764
34816	84256	FLYWCH1	FLYWCH-type zinc finger 1	Hs.655321	ENSG00000059122	A_24_P313445	ref|Homo sapiens FLYWCH-type zinc finger 1 (FLYWCH1), transcript variant 2, mRNA [NM_020912]	-0.164436	0.892277	7.53975	-6.12767	0.000392191	0.00240312	-0.221235
38672	219990	PLAC1L	placenta-specific 1-like	Hs.132310	ENSG00000149507	A_23_P317820	ref|Homo sapiens placenta-specific 1-like (PLAC1L), mRNA [NM_173801]	-0.16424	0.892398	4.84141	-3.50973	0.00909814	0.0267281	-3.64384
40671	254042	METAP1D	methionyl aminopeptidase type 1D (mitochondrial)	Hs.298250	ENSG00000172878	A_23_P90790	ref|Homo sapiens methionine aminopeptidase 1D (MAP1D), mRNA [NM_199227]	-0.164124	0.892471	6.02587	-6.77224	0.00020749	0.00151517	0.480179
37064	100288181	LOC100288181	hypothetical LOC100288181	Hs.716823	NA	A_32_P202214	gb|Homo sapiens mRNA; cDNA DKFZp781D082 (from clone DKFZp781D082). [CR627188]	-0.164032	0.892527	5.71809	-4.53657	0.00235882	0.00925267	-2.18713
3150	5796	PTPRK	protein tyrosine phosphatase, receptor type, K	Hs.155919	ENSG00000152894	A_32_P99100	ref|Homo sapiens protein tyrosine phosphatase, receptor type, K (PTPRK), transcript variant 2, mRNA [NM_002844]	-0.163992	0.892552	6.2599	-5.29429	0.000961914	0.0046951	-1.20702
15230	29	ABR	active BCR-related gene	Hs.159306	ENSG00000159842	A_23_P503182	ref|Homo sapiens active BCR-related gene (ABR), transcript variant 1, mRNA [NM_021962]	-0.163781	0.892682	10.8505	-7.30574	0.000126692	0.00105701	1.02417
4006	22985	ACIN1	apoptotic chromatin condensation inducer 1	Hs.124490	ENSG00000100813	A_23_P14389	ref|Homo sapiens apoptotic chromatin condensation inducer 1 (ACIN1), mRNA [NM_014977]	-0.163778	0.892684	8.16572	-5.22197	0.00104426	0.00498906	-1.29704
13289	221504	ZBTB9	zinc finger and BTB domain containing 9	Hs.591805	ENSG00000213588, ENSG00000236515	A_23_P8119	ref|Homo sapiens zinc finger and BTB domain containing 9 (ZBTB9), mRNA [NM_152735]	-0.163702	0.892732	6.01575	-5.49534	0.00076839	0.00396169	-0.960609
32898	3993	LLGL2	lethal giant larvae homolog 2 (Drosophila)	Hs.514477	ENSG00000073350	A_24_P307869	ref|Homo sapiens lethal giant larvae homolog 2 (Drosophila) (LLGL2), transcript variant 2, mRNA [NM_001015002]	-0.163662	0.892756	7.25238	-5.69962	0.000614932	0.00335092	-0.715926
26506	492311	C5orf53	chromosome 5 open reading frame 53	Hs.696360	ENSG00000182700	A_24_P110558	ref|Homo sapiens similar to bovine IgA regulatory protein (LOC492311), mRNA [NM_001007189]	-0.163562	0.892818	7.13992	-5.89159	0.000501202	0.00287124	-0.491104
37103	2790	GNG10	guanine nucleotide binding protein (G protein), gamma 10	Hs.534196, Hs.656890	ENSG00000242616	A_23_P112251	ref|Homo sapiens guanine nucleotide binding protein (G protein), gamma 10 (GNG10), mRNA [NM_001017998]	-0.163416	0.892908	10.503	-6.82118	0.000198069	0.00146537	0.531408
26317	333	APLP1	amyloid beta (A4) precursor-like protein 1	Hs.74565	ENSG00000105290	A_23_P27983	ref|Homo sapiens amyloid beta (A4) precursor-like protein 1 (APLP1), transcript variant 2, mRNA [NM_005166]	-0.163363	0.892941	8.28814	-6.86967	0.000189203	0.00141596	0.581897
42048	23265	EXOC7	exocyst complex component 7	Hs.514496	ENSG00000182473	A_23_P89163	ref|Homo sapiens exocyst complex component 7 (EXOC7), transcript variant 1, mRNA [NM_001013839]	-0.163348	0.89295	10.1449	-5.94495	0.000473895	0.0027573	-0.429479
43320	5884	RAD17	RAD17 homolog (S. pombe)	Hs.16184	ENSG00000152942	A_24_P97836	ref|Homo sapiens RAD17 homolog (S. pombe) (RAD17), transcript variant 8, mRNA [NM_002873]	-0.163342	0.892954	7.68269	-4.39649	0.00280972	0.0106033	-2.37736
31190	56133	PCDHB2	protocadherin beta 2	Hs.533023	ENSG00000112852	A_23_P213375	ref|Homo sapiens protocadherin beta 2 (PCDHB2), mRNA [NM_018936]	-0.163277	0.892995	5.13559	-6.75613	0.000210702	0.00153243	0.463248
42116	51390	AIG1	androgen-induced 1	Hs.567501	ENSG00000146416	A_23_P93431	ref|Homo sapiens androgen-induced 1 (AIG1), mRNA [NM_016108]	-0.163003	0.893164	8.76753	-5.81971	0.000540795	0.00303933	-0.574712
5942	400818	NBPF9	neuroblastoma breakpoint family, member 9	Hs.534675, Hs.714127	ENSG00000168614, ENSG00000203832	A_24_P16541	ref|Homo sapiens neuroblastoma breakpoint family, member 20 (NBPF20), mRNA [NM_001037675]	-0.162834	0.893269	9.16246	-7.76054	8.5e-05	0.000795757	1.46391
31834	79031	PDCL3	phosducin-like 3	Hs.469459	ENSG00000115539	A_32_P157531	ref|Homo sapiens phosducin-like 3 (PDCL3), mRNA [NM_024065]	-0.162799	0.89329	6.76155	-4.69172	0.00194995	0.00802246	-1.97974
21106	55532	SLC30A10	solute carrier family 30, member 10	Hs.284450	ENSG00000196660	A_23_P86242	ref|Homo sapiens solute carrier family 30, member 10 (SLC30A10), mRNA [NM_018713]	-0.162612	0.893406	4.99608	-4.64105	0.00207422	0.00841089	-2.0471
22327	7482	WNT2B	wingless-type MMTV integration site family, member 2B	Hs.258575	ENSG00000134245	A_23_P138352	ref|Homo sapiens wingless-type MMTV integration site family, member 2B (WNT2B), transcript variant WNT-2B1, mRNA [NM_004185]	-0.162507	0.893471	6.32539	-4.17326	0.00373544	0.0132943	-2.68625
30060	8425	LTBP4	latent transforming growth factor beta binding protein 4	Hs.466766	ENSG00000090006	A_24_P181731	ref|Homo sapiens latent transforming growth factor beta binding protein 4 (LTBP4), transcript variant 1, mRNA [NM_001042544]	-0.162414	0.893529	7.73451	-5.06207	0.0012554	0.00574046	-1.49868
30492	9454	HOMER3	homer homolog 3 (Drosophila)	Hs.720208	ENSG00000051128	A_23_P39364	ref|Homo sapiens homer homolog 3 (Drosophila) (HOMER3), mRNA [NM_004838]	-0.162397	0.893539	12.5364	-5.12944	0.00116117	0.00541521	-1.41328
28849	3960	LGALS4	lectin, galactoside-binding, soluble, 4	Hs.5302	ENSG00000171747	A_23_P254917	ref|Homo sapiens lectin, galactoside-binding, soluble, 4 (LGALS4), mRNA [NM_006149]	-0.162386	0.893546	5.43084	-5.23147	0.001033	0.00494949	-1.28517
37244	9847	KIAA0528	KIAA0528	Hs.271014	ENSG00000111731	A_23_P151027	ref|Homo sapiens KIAA0528 (KIAA0528), mRNA [NM_014802]	-0.162333	0.893579	7.54805	-5.53702	0.000733923	0.00383827	-0.910227
36701	342096	GOLGA6A	golgin A6 family, member A	Hs.546408, Hs.672474	ENSG00000159289	A_23_P106371	ref|Homo sapiens golgi autoantigen, golgin subfamily a, 6 (GOLGA6), mRNA [NM_001038640]	-0.162327	0.893583	5.15084	-5.62025	0.000670106	0.00358448	-0.810328
2206	80150	ASRGL1	asparaginase like 1	Hs.535326	ENSG00000162174	A_23_P203391	ref|Homo sapiens asparaginase like 1 (ASRGL1), transcript variant 1, mRNA [NM_001083926]	-0.162187	0.893669	7.44052	-6.94423	0.000176423	0.00134302	0.659012
40082	728609	SDHAP3	succinate dehydrogenase complex, subunit A, flavoprotein pseudogene 3	Hs.379186	NA	A_23_P156807	gb|Homo sapiens cDNA FLJ14015 fis, clone HEMBA1000327. [AK024077]	-0.1621	0.893723	7.66607	-5.99526	0.000449652	0.00264826	-0.371708
30446	79603	CERS4	ceramide synthase 4	Hs.515111	ENSG00000090661	A_23_P153867	ref|Homo sapiens LAG1 homolog, ceramide synthase 4 (LASS4), mRNA [NM_024552]	-0.162067	0.893744	7.31052	-3.73214	0.00670242	0.0210548	-3.31667
37151	4353	MPO	myeloperoxidase	Hs.458272	ENSG00000005381	A_23_P141173	ref|Homo sapiens myeloperoxidase (MPO), nuclear gene encoding mitochondrial protein, mRNA [NM_000250]	-0.161967	0.893806	4.86412	-4.00512	0.00465189	0.0158247	-2.92348
5244	9973	CCS	copper chaperone for superoxide dismutase	Hs.502917	ENSG00000173992	A_23_P127475	ref|Homo sapiens copper chaperone for superoxide dismutase (CCS), mRNA [NM_005125]	-0.161928	0.89383	9.64301	-6.025	0.000435973	0.00259229	-0.337714
42636	3316	HSPB2	heat shock 27kDa protein 2	Hs.709660	ENSG00000170276, ENSG00000254445	A_23_P161727	ref|Homo sapiens heat shock 27kDa protein 2 (HSPB2), mRNA [NM_001541]	-0.161903	0.893845	5.4058	-6.81106	0.000199977	0.00147454	0.52084
1046	5793	PTPRG	protein tyrosine phosphatase, receptor type, G	Hs.595541	ENSG00000144724	A_23_P41054	ref|Homo sapiens protein tyrosine phosphatase, receptor type, G (PTPRG), mRNA [NM_002841]	-0.161765	0.893931	8.88453	-5.32377	0.000930434	0.00458334	-1.17054
5307	22881	ANKRD6	ankyrin repeat domain 6	Hs.702213	ENSG00000135299	A_23_P70297	gb|Homo sapiens mRNA for KIAA0957 protein, partial cds. [AB023174]	-0.161697	0.893973	6.8527	-6.91462	0.000181379	0.00136922	0.628459
8325	1326	MAP3K8	mitogen-activated protein kinase kinase kinase 8	Hs.432453	ENSG00000107968	A_23_P23947	ref|Homo sapiens mitogen-activated protein kinase kinase kinase 8 (MAP3K8), mRNA [NM_005204]	-0.161604	0.89403	5.91584	-5.2254	0.00104017	0.00497888	-1.29275
41122	5893	RAD52	RAD52 homolog (S. cerevisiae)	Hs.410355	ENSG00000002016	A_23_P64990	ref|Homo sapiens RAD52 homolog (S. cerevisiae) (RAD52), mRNA [NM_134424]	-0.161595	0.894036	9.07948	-5.34396	0.000909528	0.00450413	-1.14562
10548	5395	PMS2	PMS2 postmeiotic segregation increased 2 (S. cerevisiae)	Hs.632637	ENSG00000122512	A_24_P374586	ref|Homo sapiens PMS2 postmeiotic segregation increased 2 (S. cerevisiae) (PMS2), transcript variant 1, mRNA [NM_000535]	-0.161567	0.894054	8.44287	-6.65382	0.00023243	0.00163751	0.35506
12137	2800	GOLGA1	golgin A1	Hs.133469, Hs.59504	ENSG00000136935	A_23_P258978	ref|Homo sapiens golgi autoantigen, golgin subfamily a, 1 (GOLGA1), mRNA [NM_002077]	-0.161478	0.894109	7.97977	-6.83418	0.000195648	0.0014527	0.544969
38558	8639	AOC3	amine oxidase, copper containing 3 (vascular adhesion protein 1)	Hs.198241	ENSG00000131471	A_23_P426305	ref|Homo sapiens amine oxidase, copper containing 3 (vascular adhesion protein 1) (AOC3), mRNA [NM_003734]	-0.161468	0.894115	6.52364	-5.02415	0.00131211	0.00594139	-1.54703
2751	54996	MOSC2	MOCO sulphurase C-terminal domain containing 2	Hs.369042	ENSG00000117791	A_23_P200685	ref|Homo sapiens MOCO sulphurase C-terminal domain containing 2 (MOSC2), mRNA [NM_017898]	-0.161398	0.894158	7.72191	-7.34068	0.000122786	0.00103296	1.05871
20763	85371	KIAA1656	KIAA1656 protein	Hs.505597, Hs.730361	NA	A_32_P378035	gb|Homo sapiens mRNA for KIAA1656 protein, partial cds. [AB051443]	-0.161382	0.894168	5.44518	-4.94111	0.00144646	0.00639047	-1.65363
19498	23385	NCSTN	nicastrin	Hs.517249	ENSG00000162736	A_23_P34402	ref|Homo sapiens nicastrin (NCSTN), mRNA [NM_015331]	-0.161323	0.894205	11.042	-4.93011	0.00146537	0.00645496	-1.66783
24667	54985	HCFC1R1	host cell factor C1 regulator 1 (XPO1 dependent)	Hs.423103	ENSG00000103145	A_23_P26534	ref|Homo sapiens host cell factor C1 regulator 1 (XPO1 dependent) (HCFC1R1), transcript variant 1, mRNA [NM_017885]	-0.161236	0.894259	9.99981	-6.61435	0.000241473	0.00168502	0.312995
12404	29903	CCDC106	coiled-coil domain containing 106	Hs.82482	ENSG00000173581	A_23_P16197	ref|Homo sapiens coiled-coil domain containing 106 (CCDC106), mRNA [NM_013301]	-0.16122	0.894268	6.56311	-6.30838	0.000326525	0.00210077	-0.0194695
37042	1739	DLG1	discs, large homolog 1 (Drosophila)	Hs.292549	ENSG00000075711	A_23_P416142	ref|Homo sapiens discs, large homolog 1 (Drosophila) (DLG1), transcript variant 2, mRNA [NM_004087]	-0.16119	0.894287	9.19785	-5.78087	0.000563629	0.00313235	-0.620178
313	6799	SULT1A2	sulfotransferase family, cytosolic, 1A, phenol-preferring, member 2	Hs.546304	ENSG00000197165	A_23_P106773	ref|Homo sapiens sulfotransferase family, cytosolic, 1A, phenol-preferring, member 2 (SULT1A2), transcript variant 2, mRNA [NM_177528]	-0.161162	0.894304	5.6465	-6.70168	0.000221968	0.00158722	0.405827
16845	4781	NFIB	nuclear factor I/B	Hs.644095	ENSG00000147862	A_23_P216448	ref|Homo sapiens nuclear factor I/B (NFIB), mRNA [NM_005596]	-0.161147	0.894314	6.33496	-4.16438	0.00377857	0.0133981	-2.69868
5270	1108	CHD4	chromodomain helicase DNA binding protein 4	Hs.162233	ENSG00000111642	A_23_P53541	ref|Homo sapiens chromodomain helicase DNA binding protein 4 (CHD4), mRNA [NM_001273]	-0.161007	0.894401	10.2999	-7.26448	0.000131485	0.00108407	0.983208
41288	8644	AKR1C3	aldo-keto reductase family 1, member C3 (3-alpha hydroxysteroid dehydrogenase, type II)	Hs.78183	ENSG00000196139	A_23_P138541	ref|Homo sapiens aldo-keto reductase family 1, member C3 (3-alpha hydroxysteroid dehydrogenase, type II) (AKR1C3), mRNA [NM_003739]	-0.160985	0.894414	7.49821	-7.71636	8.83e-05	0.000817677	1.42211
25962	5373	PMM2	phosphomannomutase 2	Hs.625732	ENSG00000140650	A_23_P432360	ref|Homo sapiens phosphomannomutase 2 (PMM2), mRNA [NM_000303]	-0.160912	0.894459	8.23378	-6.47496	0.000276698	0.00185819	0.162936
4764	5599	MAPK8	mitogen-activated protein kinase 8	Hs.138211	ENSG00000107643	A_23_P356152	ref|Homo sapiens mitogen-activated protein kinase 8 (MAPK8), transcript variant JNK1-b2, mRNA [NM_139047]	-0.160875	0.894482	7.75215	-7.68746	9.05e-05	0.000831536	1.39466
38623	9899	SV2B	synaptic vesicle glycoprotein 2B	Hs.21754	ENSG00000185518	A_23_P100022	ref|Homo sapiens synaptic vesicle glycoprotein 2B (SV2B), mRNA [NM_014848]	-0.160577	0.894667	5.04622	-3.91494	0.00524197	0.0173331	-3.0523
14969	81858	SHARPIN	SHANK-associated RH domain interactor	Hs.529755	ENSG00000179526	A_23_P94942	ref|Homo sapiens SHANK-associated RH domain interactor (SHARPIN), mRNA [NM_030974]	-0.160524	0.8947	9.31724	-6.41414	0.000293833	0.00194111	0.0967365
6927	100129917	LOC100129917	hypothetical LOC100129917	Hs.707307	NA	A_24_P110291	gb|Homo sapiens cDNA FLJ31021 fis, clone HLUNG2000412. [AK055583]	-0.160509	0.894709	7.87174	-6.62047	0.000240047	0.0016775	0.319522
29297	163351	GBP6	guanylate binding protein family, member 6	Hs.254338	ENSG00000183347	A_23_P130642	ref|Homo sapiens guanylate binding protein family, member 6 (GBP6), mRNA [NM_198460]	-0.160485	0.894724	14.5114	-3.75672	0.00648273	0.0205046	-3.28088
31144	145773	FAM81A	family with sequence similarity 81, member A	Hs.531168	ENSG00000157470	A_23_P423482	ref|Homo sapiens family with sequence similarity 81, member A (FAM81A), mRNA [NM_152450]	-0.160379	0.89479	5.27177	-3.95085	0.00499782	0.0167376	-3.00088
42635	11142	PKIG	protein kinase (cAMP-dependent, catalytic) inhibitor gamma	Hs.472831	ENSG00000168734	A_23_P91221	ref|Homo sapiens protein kinase (cAMP-dependent, catalytic) inhibitor gamma (PKIG), transcript variant 1, mRNA [NM_181805]	-0.160138	0.894939	6.67217	-7.16275	0.000144196	0.00115977	0.881443
40137	85414	SLC45A3	solute carrier family 45, member 3	Hs.278695	ENSG00000158715	A_24_P208345	ref|Homo sapiens solute carrier family 45, member 3 (SLC45A3), mRNA [NM_033102]	-0.160085	0.894972	7.6188	-7.45529	0.000110888	0.000956188	1.17111
25577	10351	ABCA8	ATP-binding cassette, sub-family A (ABC1), member 8	Hs.58351	ENSG00000141338	A_23_P118615	ref|Homo sapiens ATP-binding cassette, sub-family A (ABC1), member 8 (ABCA8), mRNA [NM_007168]	-0.160007	0.895021	8.35348	-6.30945	0.000326175	0.002099	-0.0182858
14236	2517	FUCA1	fucosidase, alpha-L- 1, tissue	Hs.370858	ENSG00000179163	A_23_P11543	ref|Homo sapiens fucosidase, alpha-L- 1, tissue (FUCA1), mRNA [NM_000147]	-0.159817	0.895139	8.88453	-6.56128	0.000254258	0.00174769	0.256134
983	1999	ELF3	E74-like factor 3 (ets domain transcription factor, epithelial-specific )	NA	ENSG00000163435	A_23_P104188	ref|Homo sapiens E74-like factor 3 (ets domain transcription factor, epithelial-specific ) (ELF3), transcript variant 1, mRNA [NM_004433]	-0.159811	0.895143	5.47425	-6.6418	0.000235144	0.00165175	0.342268
37656	79772	MCTP1	multiple C2 domains, transmembrane 1	Hs.655087	ENSG00000175471	A_24_P212481	ref|Homo sapiens multiple C2 domains, transmembrane 1 (MCTP1), transcript variant L, mRNA [NM_024717]	-0.159805	0.895146	8.28708	-5.11605	0.00117926	0.00547839	-1.43021
31160	124220	ZG16B	zymogen granule protein 16 homolog B (rat)	Hs.105887	ENSG00000162078	A_23_P118203	ref|Homo sapiens similar to common salivary protein 1 (LOC124220), mRNA [NM_145252]	-0.159732	0.895191	5.08841	-4.64974	0.0020523	0.00833996	-2.03552
11357	79778	MICALL2	MICAL-like 2	Hs.376617, Hs.663699	ENSG00000164877	A_24_P206305	ref|Homo sapiens MICAL-like 2 (MICALL2), transcript variant 1, mRNA [NM_182924]	-0.159725	0.895196	9.18821	-4.51876	0.00241148	0.00941278	-2.21116
35203	9244	CRLF1	cytokine receptor-like factor 1	Hs.114948	ENSG00000006016	A_23_P56197	ref|Homo sapiens cytokine receptor-like factor 1 (CRLF1), mRNA [NM_004750]	-0.159624	0.895259	12.7389	-6.49173	0.00027217	0.00183545	0.181119
30459	1589	CYP21A2	cytochrome P450, family 21, subfamily A, polypeptide 2	Hs.654479	ENSG00000231852, ENSG00000233151, ENSG00000206338, ENSG00000232414, ENSG00000198457, ENSG00000235134	A_23_P257478	ref|Homo sapiens cytochrome P450, family 21, subfamily A, polypeptide 2 (CYP21A2), transcript variant 1, mRNA [NM_000500]	-0.159373	0.895414	5.40658	-5.59771	0.000686754	0.00364387	-0.837281
1270	29109	FHOD1	formin homology 2 domain containing 1	Hs.95231	ENSG00000135723	A_23_P37778	ref|Homo sapiens formin homology 2 domain containing 1 (FHOD1), mRNA [NM_013241]	-0.159333	0.895439	10.0104	-6.42508	0.000290665	0.00192752	0.108682
5697	54868	TMEM104	transmembrane protein 104	Hs.370262	ENSG00000109066	A_24_P284324	ref|Homo sapiens transmembrane protein 104 (TMEM104), mRNA [NM_017728]	-0.158922	0.895694	9.29527	-7.29344	0.0001281	0.00106528	1.01198
37213	285852	TREML4	triggering receptor expressed on myeloid cells-like 4	Hs.434181	ENSG00000188056	A_24_P655458	ref|Homo sapiens triggering receptor expressed on myeloid cells-like 4 (TREML4), mRNA [NM_198153]	-0.15891	0.895702	4.81914	-7.22665	0.00013606	0.00110834	0.945489
15997	26227	PHGDH	phosphoglycerate dehydrogenase	Hs.487296	ENSG00000092621	A_23_P85783	ref|Homo sapiens phosphoglycerate dehydrogenase (PHGDH), mRNA [NM_006623]	-0.1589	0.895708	9.34154	-4.88607	0.00154384	0.00671846	-1.72484
42414	4739	NEDD9	neural precursor cell expressed, developmentally down-regulated 9	Hs.37982	ENSG00000111859	A_23_P344555	ref|Homo sapiens neural precursor cell expressed, developmentally down-regulated 9 (NEDD9), transcript variant 1, mRNA [NM_006403]	-0.158894	0.895711	4.88821	-4.91727	0.00148779	0.00653447	-1.68443
2172	9710	KIAA0355	KIAA0355	Hs.330073	ENSG00000166398	A_23_P324490	ref|Homo sapiens KIAA0355 (KIAA0355), mRNA [NM_014686]	-0.158604	0.895891	8.46277	-6.30388	0.000328001	0.00210869	-0.0244347
22884	51114	ZDHHC9	zinc finger, DHHC-type containing 9	Hs.193566	ENSG00000188706	A_23_P95330	ref|Homo sapiens zinc finger, DHHC-type containing 9 (ZDHHC9), transcript variant 1, mRNA [NM_016032]	-0.158411	0.896012	6.5222	-5.08421	0.00122353	0.00563394	-1.47054
40786	55779	WDR52	WD repeat domain 52	Hs.584936	ENSG00000206530	A_23_P110090	gb|Homo sapiens cDNA FLJ11142 fis, clone PLACE1006552. [AK002004]	-0.158278	0.896094	5.54516	-5.18212	0.00109294	0.0051598	-1.34695
19276	3761	KCNJ4	potassium inwardly-rectifying channel, subfamily J, member 4	Hs.32505	ENSG00000168135	A_24_P6125	ref|Homo sapiens potassium inwardly-rectifying channel, subfamily J, member 4 (KCNJ4), transcript variant 1, mRNA [NM_152868]	-0.158234	0.896122	6.12227	-5.82887	0.00053556	0.00301749	-0.564016
23341	7784	ZP3	zona pellucida glycoprotein 3 (sperm receptor)	Hs.656137	ENSG00000188372	A_23_P134419	ref|Homo sapiens zona pellucida glycoprotein 3 (sperm receptor) (ZP3), transcript variant 2, mRNA [NM_007155]	-0.158107	0.8962	8.32828	-6.27089	0.000339071	0.00215893	-0.0609925
2755	650655	ABCA17P	ATP-binding cassette, sub-family A (ABC1), member 17, pseudogene	Hs.376281	NA	A_32_P29703	gb|Homo sapiens cDNA clone IMAGE:5271371. [BC042853]	-0.157967	0.896287	5.80518	-5.83471	0.000532253	0.00300261	-0.557206
25078	401264	FLJ37798	hypothetical LOC401264	Hs.544586	NA	A_32_P3385	gb|full-length cDNA clone CS0DI060YD22 of Placenta Cot 25-normalized of Homo sapiens (human). [CR611098]	-0.157893	0.896333	6.17757	-7.27465	0.000130285	0.00107643	0.993321
13306	400604	LOC400604	hypothetical LOC400604	Hs.641441	NA	A_32_P66306	gb|Homo sapiens hypothetical gene supported by BC039664, mRNA (cDNA clone IMAGE:2901155). [BC039664]	-0.15776	0.896416	6.23032	-6.2915	0.000332109	0.00212691	-0.0381447
35648	147923	ZNF420	zinc finger protein 420	Hs.444992	ENSG00000197050	A_23_P380951	ref|Homo sapiens zinc finger protein 420 (ZNF420), mRNA [NM_144689]	-0.157691	0.896459	6.70619	-7.30014	0.000127331	0.00106153	1.01862
22135	2049	EPHB3	EPH receptor B3	Hs.2913	ENSG00000182580	A_23_P95060	ref|Homo sapiens EPH receptor B3 (EPHB3), mRNA [NM_004443]	-0.157558	0.896542	6.50287	-6.82357	0.000197622	0.00146306	0.5339
24478	6453	ITSN1	intersectin 1 (SH3 domain protein)	Hs.160324	ENSG00000205726	A_23_P252962	ref|Homo sapiens intersectin 1 (SH3 domain protein) (ITSN1), transcript variant 2, mRNA [NM_001001132]	-0.157551	0.896545	8.93052	-5.16173	0.00111881	0.00525045	-1.37258
42623	7620	ZNF69	zinc finger protein 69	Hs.661955	ENSG00000198429	A_24_P254084	ref|Homo sapiens zinc finger protein 69 (ZNF69), mRNA [NM_021915]	-0.15755	0.896546	4.93731	-3.71592	0.00685183	0.0214279	-3.34033
19368	10174	SORBS3	sorbin and SH3 domain containing 3	Hs.528572	ENSG00000120896	A_23_P300714	ref|Homo sapiens sorbin and SH3 domain containing 3 (SORBS3), transcript variant 1, mRNA [NM_005775]	-0.15749	0.896584	9.25815	-6.87209	0.000188772	0.00141297	0.584411
1591	4293	MAP3K9	mitogen-activated protein kinase kinase kinase 9	Hs.445496, Hs.593542	ENSG00000006432	A_32_P147678	gb|Homo sapiens cDNA FLJ41436 fis, clone BRHIP2007741. [AK123430]	-0.157474	0.896593	6.33211	-5.38907	0.000864675	0.00433848	-1.09015
31638	9988	DMTF1	cyclin D binding myb-like transcription factor 1	Hs.196129	ENSG00000135164	A_23_P8664	ref|Homo sapiens cyclin D binding myb-like transcription factor 1 (DMTF1), transcript variant 1, mRNA [NM_021145]	-0.157166	0.896785	9.745	-7.15558	0.000145143	0.00116588	0.874221
28537	6249	CLIP1	CAP-GLY domain containing linker protein 1	Hs.524809	ENSG00000130779	A_23_P25003	ref|Homo sapiens CAP-GLY domain containing linker protein 1 (CLIP1), transcript variant 1, mRNA [NM_002956]	-0.157075	0.896841	9.62977	-4.55732	0.00229904	0.00907811	-2.15919
17200	2592	GALT	galactose-1-phosphate uridylyltransferase	Hs.522090	ENSG00000213930	A_23_P502035	ref|Homo sapiens galactose-1-phosphate uridylyltransferase (GALT), mRNA [NM_000155]	-0.157041	0.896863	7.88905	-7.52038	0.000104709	0.000917737	1.23434
29029	8940	TOP3B	topoisomerase (DNA) III beta	Hs.436401	ENSG00000100038	A_23_P80213	ref|Homo sapiens topoisomerase (DNA) III beta (TOP3B), mRNA [NM_003935]	-0.157039	0.896864	9.01702	-7.50548	0.000106089	0.000926456	1.21991
27877	51147	ING4	inhibitor of growth family, member 4	Hs.524210	ENSG00000111653	A_23_P48070	ref|Homo sapiens inhibitor of growth family, member 4 (ING4), transcript variant 1, mRNA [NM_016162]	-0.156942	0.896924	9.55158	-4.93739	0.00145283	0.00640598	-1.65844
7806	79834	PEAK1	NKF3 kinase family member	Hs.9587	ENSG00000173517	A_24_P109652	ref|Homo sapiens NKF3 kinase family member (SGK269), mRNA [NM_024776]	-0.156815	0.897003	6.93148	-5.51021	0.000755896	0.0039201	-0.942613
13598	78989	COLEC11	collectin sub-family member 11	Hs.32603	ENSG00000118004	A_24_P388322	ref|Homo sapiens collectin sub-family member 11 (COLEC11), transcript variant 2, mRNA [NM_199235]	-0.156697	0.897077	5.90765	-5.08552	0.00122167	0.00562777	-1.46888
43269	2868	GRK4	G protein-coupled receptor kinase 4	Hs.32959	ENSG00000125388	A_23_P212756	ref|Homo sapiens G protein-coupled receptor kinase 4 (GRK4), transcript variant 3, mRNA [NM_001004057]	-0.156673	0.897091	5.69972	-6.53993	0.000259613	0.0017734	0.233166
24006	1952	CELSR2	cadherin, EGF LAG seven-pass G-type receptor 2 (flamingo homolog, Drosophila)	Hs.57652	ENSG00000143126	A_24_P182620	ref|Homo sapiens cadherin, EGF LAG seven-pass G-type receptor 2 (flamingo homolog, Drosophila) (CELSR2), mRNA [NM_001408]	-0.156617	0.897126	7.01966	-6.56569	0.000253167	0.00174267	0.260872
8795	146705	C17orf56	chromosome 17 open reading frame 56	Hs.631761	ENSG00000167302	A_23_P301340	ref|Homo sapiens chromosome 17 open reading frame 56 (C17orf56), mRNA [NM_144679]	-0.15658	0.897149	10.6851	-5.35088	0.000902488	0.00447997	-1.1371
41264	55290	BRF2	BRF2, subunit of RNA polymerase III transcription initiation factor, BRF1-like	Hs.709301	ENSG00000104221	A_23_P20480	ref|Homo sapiens BRF2, subunit of RNA polymerase III transcription initiation factor, BRF1-like (BRF2), mRNA [NM_018310]	-0.156552	0.897167	6.51287	-6.06043	0.000420277	0.00252317	-0.297364
42333	53336	CPXCR1	CPX chromosome region, candidate 1	Hs.458292	ENSG00000147183	A_23_P62336	ref|Homo sapiens CPX chromosome region, candidate 1 (CPXCR1), mRNA [NM_033048]	-0.156489	0.897206	4.86906	-3.62884	0.00771778	0.0235353	-3.46791
36567	197407	ZNF48	zinc finger protein 48	Hs.513501, Hs.690989	ENSG00000180035	A_23_P415643	ref|Homo sapiens zinc finger protein 48 (ZNF48), mRNA [NM_152652]	-0.156422	0.897247	7.24852	-5.85113	0.00052308	0.00296243	-0.538089
39599	6273	S100A2	S100 calcium binding protein A2	Hs.516484	ENSG00000196754	A_23_P201706	ref|Homo sapiens S100 calcium binding protein A2 (S100A2), mRNA [NM_005978]	-0.156321	0.89731	9.74879	-6.14959	0.00038349	0.00236618	-0.196538
8367	8463	TEAD2	TEA domain family member 2	Hs.515534	ENSG00000074219	A_23_P119344	ref|Homo sapiens TEA domain family member 2 (TEAD2), mRNA [NM_003598]	-0.156297	0.897325	6.86622	-4.14425	0.00387837	0.0136827	-2.7269
31027	10446	LRRN2	leucine rich repeat neuronal 2	Hs.26312	ENSG00000170382	A_23_P11843	ref|Homo sapiens leucine rich repeat neuronal 2 (LRRN2), transcript variant 2, mRNA [NM_201630]	-0.156235	0.897364	6.74462	-6.45548	0.000282061	0.00188516	0.141786
31011	170393	C10orf91	chromosome 10 open reading frame 91	Hs.375059	ENSG00000180066	A_24_P158468	ref|Homo sapiens chromosome 10 open reading frame 91 (C10orf91), mRNA [NM_173541]	-0.155948	0.897542	5.32074	-4.59779	0.00218719	0.00875852	-2.10488
6016	728294	D2HGDH	D-2-hydroxyglutarate dehydrogenase	Hs.516813	ENSG00000180902	A_32_P6769	gb|Homo sapiens D-2-hydroxyglutarate dehydrogenase, mRNA (cDNA clone IMAGE:30334929), with apparent retained intron. [BC071598]	-0.155816	0.897625	6.07234	-4.35922	0.002945	0.0109914	-2.42843
39436	23347	SMCHD1	structural maintenance of chromosomes flexible hinge domain containing 1	Hs.8118	ENSG00000101596	A_24_P82630	ref|Homo sapiens structural maintenance of chromosomes flexible hinge domain containing 1 (SMCHD1), mRNA [NM_015295]	-0.155715	0.897687	4.83012	-4.40509	0.00277945	0.010511	-2.36559
17332	197257	LDHD	lactate dehydrogenase D	Hs.380929	ENSG00000166816	A_23_P54918	ref|Homo sapiens lactate dehydrogenase D (LDHD), nuclear gene encoding mitochondrial protein, transcript variant 1, mRNA [NM_153486]	-0.155612	0.897751	8.25782	-7.1661	0.000143757	0.00115723	0.884808
32466	284185	LINC00482	long intergenic non-protein coding RNA 482	Hs.631762	NA	A_23_P426565	ref|Homo sapiens chromosome 17 open reading frame 55 (C17orf55), mRNA [NM_178519]	-0.155534	0.8978	5.65647	-4.5348	0.00236398	0.00926791	-2.18951
33466	23126	POGZ	pogo transposable element with ZNF domain	Hs.489873	ENSG00000143442	A_23_P500734	ref|Homo sapiens pogo transposable element with ZNF domain (POGZ), transcript variant 1, mRNA [NM_015100]	-0.155474	0.897837	9.59726	-7.26055	0.000131953	0.00108689	0.979298
36082	2525	FUT3	fucosyltransferase 3 (galactoside 3(4)-L-fucosyltransferase, Lewis blood group)	Hs.169238	ENSG00000171124	A_23_P360316	ref|Homo sapiens fucosyltransferase 3 (galactoside 3(4)-L-fucosyltransferase, Lewis blood group) (FUT3), transcript variant 1, mRNA [NM_000149]	-0.154923	0.898181	5.25746	-5.40186	0.000852413	0.00428786	-1.07449
27708	84309	NUDT16L1	nudix (nucleoside diphosphate linked moiety X)-type motif 16-like 1	Hs.513315	ENSG00000168101	A_23_P49429	ref|Homo sapiens nudix (nucleoside diphosphate linked moiety X)-type motif 16-like 1 (NUDT16L1), mRNA [NM_032349]	-0.154921	0.898181	10.1533	-5.48717	0.000775358	0.00398908	-0.970517
20664	728448	PPIEL	peptidylprolyl isomerase E-like pseudogene	Hs.472508	NA	A_24_P315921	gb|Homo sapiens cDNA FLJ36340 fis, clone THYMU2006468. [AK093659]	-0.154882	0.898206	7.29325	-6.82591	0.000197184	0.00146081	0.536347
12461	10146	G3BP1	GTPase activating protein (SH3 domain) binding protein 1	Hs.587054	ENSG00000145907	A_23_P336479	ref|Homo sapiens GTPase activating protein (SH3 domain) binding protein 1 (G3BP1), transcript variant 1, mRNA [NM_005754]	-0.154827	0.89824	9.55908	-6.38545	0.000302327	0.00198182	0.0653442
38878	126074	C19orf39	chromosome 19 open reading frame 39	Hs.631619	ENSG00000173928	A_23_P353085	ref|Homo sapiens chromosome 19 open reading frame 39 (C19orf39), mRNA [NM_175871]	-0.154696	0.898321	7.86232	-3.79068	0.00619182	0.0197671	-3.23155
5823	643802	LOC643802	u3 small nucleolar ribonucleoprotein protein MPP10-like	Hs.451336	NA	A_24_P221968	gb|Homo sapiens mRNA; cDNA DKFZp313P036 (from clone DKFZp313P036). [BX537874]	-0.154644	0.898354	5.12679	-4.96186	0.00141153	0.0062732	-1.62691
15842	100287497	LOC100287497	hypothetical LOC100287497	NA	ENSG00000197049	A_24_P290333	gb|Homo sapiens cDNA: FLJ23183 fis, clone LNG11477. [AK026836]	-0.154643	0.898355	6.7357	-5.05086	0.00127188	0.00579628	-1.51296
41634	642864	SRG7	spermatogenesis-related protein 7	Hs.372658	NA	A_32_P70056	gb|Homo sapiens spermatogenesis-related protein 7 mRNA, complete cds. [AY312144]	-0.154587	0.898389	5.05781	-6.30949	0.000326162	0.002099	-0.0182437
22847	23334	SZT2	seizure threshold 2 homolog (mouse)	Hs.634915, Hs.643560, Hs.709864, Hs.711213, Hs.711258	ENSG00000198198	A_23_P51639	ref|Homo sapiens KIAA0467 (KIAA0467), mRNA [NM_015284]	-0.154472	0.898461	7.68087	-5.48297	0.000778968	0.00400332	-0.975616
16630	387680	FAM21A	family with sequence similarity 21, member A	Hs.645272	ENSG00000099290	A_24_P677639	ref|Homo sapiens family with sequence similarity 21, member A (FAM21A), mRNA [NM_001005751]	-0.154455	0.898471	5.94025	-6.75228	0.000211477	0.00153627	0.459197
32906	730091	LOC730091	hypothetical LOC730091	Hs.659905	NA	A_32_P224327	gb|Homo sapiens cDNA FLJ31839 fis, clone NT2RP7000086. [AK056401]	-0.154397	0.898508	5.42609	-5.71597	0.000604209	0.0032998	-0.696595
43049	79690	GAL3ST4	galactose-3-O-sulfotransferase 4	Hs.44856	ENSG00000197093	A_23_P31240	ref|Homo sapiens galactose-3-O-sulfotransferase 4 (GAL3ST4), mRNA [NM_024637]	-0.154389	0.898513	5.12986	-5.24832	0.00101339	0.00488245	-1.26416
2690	55108	BSDC1	BSD domain containing 1	Hs.353454	ENSG00000160058	A_23_P11705	ref|Homo sapiens BSD domain containing 1 (BSDC1), mRNA [NM_018045]	-0.154225	0.898615	9.58029	-5.46625	0.000793508	0.00406015	-0.995913
16134	146664	MGAT5B	mannosyl (alpha-1,6-)-glycoprotein beta-1,6-N-acetyl-glucosaminyltransferase, isozyme B	Hs.144531	ENSG00000167889	A_24_P219474	ref|Homo sapiens mannosyl (alpha-1,6-)-glycoprotein beta-1,6-N-acetyl-glucosaminyltransferase, isozyme B (MGAT5B), transcript variant 1, mRNA [NM_144677]	-0.154138	0.898669	8.51231	-5.59737	0.000687014	0.0036448	-0.837697
7092	192669	EIF2C3	eukaryotic translation initiation factor 2C, 3	Hs.657659	ENSG00000126070	A_23_P97021	ref|Homo sapiens eukaryotic translation initiation factor 2C, 3 (EIF2C3), transcript variant 1, mRNA [NM_024852]	-0.15405	0.898724	8.59091	-6.98973	0.000169099	0.00130328	0.705762
21964	53904	MYO3A	myosin IIIA	Hs.662630	ENSG00000095777	A_23_P86411	ref|Homo sapiens myosin IIIA (MYO3A), mRNA [NM_017433]	-0.154048	0.898725	5.28346	-3.37132	0.0110427	0.0309692	-3.8502
18554	81493	SYNC	syncoilin, intermediate filament protein	Hs.16003, Hs.712631	ENSG00000162520	A_23_P96965	ref|Homo sapiens syncoilin, intermediate filament protein (SYNC), mRNA [NM_030786]	-0.154038	0.898732	7.03315	-7.15962	0.000144608	0.00116244	0.878295
7174	7473	WNT3	wingless-type MMTV integration site family, member 3	Hs.445884	ENSG00000108379	A_23_P130158	ref|Homo sapiens wingless-type MMTV integration site family, member 3 (WNT3), mRNA [NM_030753]	-0.153829	0.898861	6.46912	-6.43184	0.000288727	0.00191995	0.11605
39529	6811	STX5	syntaxin 5	Hs.654602	ENSG00000162236	A_23_P24755	ref|Homo sapiens syntaxin 5 (STX5), mRNA [NM_003164]	-0.153781	0.898891	7.9007	-6.29958	0.000329423	0.00211524	-0.0291985
29852	84229	CCDC135	coiled-coil domain containing 135	Hs.513635	ENSG00000159625	A_23_P129367	ref|Homo sapiens coiled-coil domain containing 135 (CCDC135), mRNA [NM_032269]	-0.153677	0.898956	5.01894	-4.66764	0.00200795	0.00820739	-2.0117
5825	51308	REEP2	receptor accessory protein 2	Hs.416090	ENSG00000132563	A_23_P19182	ref|Homo sapiens receptor accessory protein 2 (REEP2), mRNA [NM_016606]	-0.153468	0.899087	11.2774	-3.93045	0.005135	0.0170718	-3.03008
36186	84148	KAT8	K(lysine) acetyltransferase 8	Hs.533803	ENSG00000103510	A_23_P100478	ref|Homo sapiens MYST histone acetyltransferase 1 (MYST1), transcript variant 1, mRNA [NM_032188]	-0.153348	0.899162	7.4471	-6.69786	0.000222785	0.00159092	0.401779
35340	2664	GDI1	GDP dissociation inhibitor 1	Hs.595950, Hs.74576	ENSG00000203879	A_23_P45496	ref|Homo sapiens GDP dissociation inhibitor 1 (GDI1), mRNA [NM_001493]	-0.153234	0.899232	9.58872	-7.29028	0.000128465	0.00106672	1.00884
41650	161253	REM2	RAS (RAD and GEM)-like GTP binding 2	Hs.444911	ENSG00000139890	A_23_P151624	ref|Homo sapiens RAS (RAD and GEM)-like GTP binding 2 (REM2), mRNA [NM_173527]	-0.153124	0.899301	4.9305	-4.91177	0.00149751	0.00656385	-1.69154
24964	51084	CRYL1	crystallin, lambda 1	Hs.370703	ENSG00000165475	A_23_P162746	ref|Homo sapiens crystallin, lambda 1 (CRYL1), mRNA [NM_015974]	-0.153075	0.899332	8.99159	-6.54119	0.000259293	0.00177259	0.234528
34928	96610	LOC96610	BMS1 homolog, ribosome assembly protein (yeast) pseudogene	Hs.449601	NA	A_24_P93316	gb|Homo sapiens cDNA: FLJ22755 fis, clone KAIA0769. [AK026408]	-0.15306	0.899341	7.77745	-5.36919	0.000884139	0.00441316	-1.11457
981	158056	MAMDC4	MAM domain containing 4	Hs.376780	ENSG00000177943	A_23_P71790	ref|Homo sapiens MAM domain containing 4 (MAMDC4), mRNA [NM_206920]	-0.153048	0.899349	7.07958	-4.51426	0.00242498	0.00945153	-2.21724
35899	3300	DNAJB2	DnaJ (Hsp40) homolog, subfamily B, member 2	Hs.77768	ENSG00000135924	A_23_P209519	ref|Homo sapiens DnaJ (Hsp40) homolog, subfamily B, member 2 (DNAJB2), transcript variant 1, mRNA [NM_001039550]	-0.153022	0.899364	5.56163	-5.64226	0.000654276	0.00351889	-0.784066
4442	1775	DNASE1L2	deoxyribonuclease I-like 2	Hs.103503	ENSG00000167968	A_23_P3643	ref|Homo sapiens deoxyribonuclease I-like 2 (DNASE1L2), mRNA [NM_001374]	-0.152975	0.899394	6.49022	-4.8048	0.00170107	0.00723531	-1.83077
12747	607	BCL9	B-cell CLL/lymphoma 9	Hs.415209	ENSG00000116128	A_23_P382602	ref|Homo sapiens B-cell CLL/lymphoma 9 (BCL9), mRNA [NM_004326]	-0.152881	0.899452	5.33376	-6.16695	0.000376752	0.00233624	-0.177024
42838	3965	LGALS9	lectin, galactoside-binding, soluble, 9	Hs.81337	ENSG00000168961	A_23_P116557	ref|Homo sapiens lectin, galactoside-binding, soluble, 9 (LGALS9), transcript variant 1, mRNA [NM_009587]	-0.152769	0.899522	5.16414	-3.93624	0.00509565	0.0169865	-3.02178
12635	646450	C3orf71	chromosome 3 open reading frame 71	Hs.720727	ENSG00000221883	A_24_P76018	ref|Homo sapiens chromosome 3 open reading frame 71 (C3orf71), mRNA [NM_001123040]	-0.152718	0.899554	6.27697	-5.43453	0.000821945	0.00416649	-1.03455
33291	91661	ZNF765	zinc finger protein 765	Hs.685640	ENSG00000196417	A_24_P202637	gb|Homo sapiens zinc finger protein 765, mRNA (cDNA clone IMAGE:5094445). [BC017357]	-0.152675	0.899581	7.05853	-6.12141	0.000394716	0.00241179	-0.2283
42194	4062	LY6H	lymphocyte antigen 6 complex, locus H	Hs.159590	ENSG00000176956	A_23_P134914	ref|Homo sapiens lymphocyte antigen 6 complex, locus H (LY6H), transcript variant 1, mRNA [NM_002347]	-0.152661	0.89959	4.90067	-4.24627	0.00340041	0.0123355	-2.58444
41800	9842	PLEKHM1	pleckstrin homology domain containing, family M (with RUN domain) member 1	Hs.514242	ENSG00000257339, ENSG00000225190	A_24_P49514	ref|Homo sapiens pleckstrin homology domain containing, family M (with RUN domain) member 1 (PLEKHM1), mRNA [NM_014798]	-0.152561	0.899652	6.42383	-3.22936	0.013506	0.0363422	-4.0638
41927	54437	SEMA5B	sema domain, seven thrombospondin repeats (type 1 and type 1-like), transmembrane domain (TM) and short cytoplasmic domain, (semaphorin) 5B	Hs.210870	ENSG00000082684	A_23_P121374	ref|Homo sapiens sema domain, seven thrombospondin repeats (type 1 and type 1-like), transmembrane domain (TM) and short cytoplasmic domain, (semaphorin) 5B (SEMA5B), transcript variant 1, mRNA [NM_001031702]	-0.152509	0.899685	4.8846	-4.714	0.00189789	0.00786124	-1.95024
3130	401044	FLJ40712	FLJ40712 protein	Hs.683800	NA	A_24_P187874	gb|Homo sapiens cDNA FLJ40712 fis, clone THYMU2027249. [AK098031]	-0.152445	0.899724	6.28056	-7.3788	0.000118677	0.0010062	1.09624
35001	5193	PEX12	peroxisomal biogenesis factor 12	Hs.591190	ENSG00000108733	A_24_P416411	ref|Homo sapiens peroxisomal biogenesis factor 12 (PEX12), mRNA [NM_000286]	-0.152369	0.899772	7.26111	-3.9892	0.00475058	0.0160847	-2.94614
17014	83854	ANGPTL6	angiopoietin-like 6	Hs.712850	ENSG00000130812	A_23_P50276	ref|Homo sapiens angiopoietin-like 6 (ANGPTL6), mRNA [NM_031917]	-0.152346	0.899786	5.6631	-4.02904	0.00450777	0.0154251	-2.8895
40217	157562	LOC157562	hypothetical protein LOC157562	Hs.27371	NA	A_32_P192922	gb|Homo sapiens mRNA; cDNA DKFZp566J123 (from clone DKFZp566J123). [AL050061]	-0.151918	0.900053	6.21309	-5.97478	0.00045935	0.00269618	-0.395184
24766	90665	TBL1Y	transducin (beta)-like 1, Y-linked	Hs.664560	ENSG00000092377	A_23_P114466	ref|Homo sapiens transducin (beta)-like 1Y-linked (TBL1Y), transcript variant 1, mRNA [NM_033284]	-0.151772	0.900144	6.81117	-6.49856	0.000270349	0.00182545	0.188513
17966	2941	GSTA4	glutathione S-transferase alpha 4	Hs.485557	ENSG00000170899	A_23_P110941	ref|Homo sapiens glutathione S-transferase alpha 4 (GSTA4), mRNA [NM_001512]	-0.151749	0.900159	8.88251	-6.25188	0.000345636	0.00218701	-0.0821111
18312	80179	MYO19	myosin XIX	Hs.302051	ENSG00000255925, ENSG00000141140	A_23_P320250	ref|Homo sapiens myosin XIX (MYO19), transcript variant 1, mRNA [NM_025109]	-0.15174	0.900164	10.4933	-4.65785	0.00203208	0.00828337	-2.02472
35409	100316868	HOTTIP	HOXA distal transcript antisense RNA (non-protein coding)	Hs.634354	NA	A_32_P52386	gb|Homo sapiens cDNA FLJ36668 fis, clone UTERU2003926. [AK093987]	-0.15174	0.900164	5.68499	-4.46164	0.00258923	0.0099381	-2.28853
7616	57181	SLC39A10	solute carrier family 39 (zinc transporter), member 10	Hs.650158	ENSG00000196950	A_23_P119778	ref|Homo sapiens solute carrier family 39 (zinc transporter), member 10 (SLC39A10), transcript variant 2, mRNA [NM_020342]	-0.151722	0.900176	11.3006	-6.67902	0.000226856	0.00160997	0.381817
11157	54431	DNAJC10	DnaJ (Hsp40) homolog, subfamily C, member 10	Hs.516632	ENSG00000077232	A_23_P319133	ref|Homo sapiens DnaJ (Hsp40) homolog, subfamily C, member 10 (DNAJC10), mRNA [NM_018981]	-0.151671	0.900207	9.8801	-6.58205	0.000249167	0.00172429	0.278427
18363	57118	CAMK1D	calcium/calmodulin-dependent protein kinase ID	Hs.659517	ENSG00000183049	A_23_P124252	ref|Homo sapiens calcium/calmodulin-dependent protein kinase ID (CAMK1D), transcript variant 1, mRNA [NM_020397]	-0.151608	0.900247	7.78954	-5.89853	0.000497556	0.00285745	-0.483072
30171	22909	FAN1	FANCD2/FANCI-associated nuclease 1	Hs.584863	ENSG00000198690	A_23_P377888	ref|Homo sapiens myotubularin related protein 15 (MTMR15), mRNA [NM_014967]	-0.151595	0.900255	9.03784	-7.10618	0.000151856	0.00120489	0.824363
25808	129025	ZNF280A	zinc finger protein 280A	Hs.178665	ENSG00000169548	A_23_P154972	ref|Homo sapiens zinc finger protein 280A (ZNF280A), mRNA [NM_080740]	-0.151545	0.900286	7.41831	-6.32954	0.000319672	0.00206714	0.00389265
26176	57147	SCYL3	SCY1-like 3 (S. cerevisiae)	Hs.435560	ENSG00000000457	A_23_P74320	ref|Homo sapiens SCY1-like 3 (S. cerevisiae) (SCYL3), transcript variant 1, mRNA [NM_020423]	-0.151536	0.900292	7.61238	-6.35936	0.000310287	0.00202118	0.036715
26237	256987	SERINC5	serine incorporator 5	Hs.288232	ENSG00000164300	A_23_P423457	ref|Homo sapiens serine incorporator 5 (SERINC5), mRNA [NM_178276]	-0.151486	0.900323	8.02442	-6.54062	0.000259438	0.00177286	0.233911
42944	51622	CCZ1	CCZ1 vacuolar protein trafficking and biogenesis associated homolog (S. cerevisiae)	Hs.530000	ENSG00000122674, ENSG00000146574	A_24_P377489	ref|Homo sapiens chromosome 7 open reading frame 28A (C7orf28A), mRNA [NM_015622]	-0.151399	0.900377	11.4935	-5.81003	0.000546387	0.00306163	-0.586023
21847	51276	ZNF571	zinc finger protein 571	Hs.590944	ENSG00000180479	A_23_P108342	ref|Homo sapiens zinc finger protein 571 (ZNF571), mRNA [NM_016536]	-0.151371	0.900394	7.70658	-4.9404	0.00144767	0.0063932	-1.65455
40264	80199	FUZ	fuzzy homolog (Drosophila)	Hs.288800	ENSG00000010361	A_24_P121891	ref|Homo sapiens fuzzy homolog (Drosophila) (FUZ), mRNA [NM_025129]	-0.151361	0.900401	6.29064	-3.49018	0.00934896	0.0273004	-3.67286
2516	25977	NECAP1	NECAP endocytosis associated 1	Hs.555927	ENSG00000089818	A_32_P144920	ref|Homo sapiens NECAP endocytosis associated 1 (NECAP1), transcript variant 1, mRNA [NM_015509]	-0.151313	0.900431	7.49485	-3.69687	0.00703195	0.0218682	-3.36817
24530	4867	NPHP1	nephronophthisis 1 (juvenile)	Hs.280388	ENSG00000144061	A_23_P108970	ens|Nephrocystin-1 (Juvenile nephronophthisis 1 protein) [Source:UniProtKB/Swiss-Prot;Acc:O15259] [ENST00000316534]	-0.151229	0.900483	5.87934	-5.44622	0.00081134	0.00412575	-1.0203
20729	1302	COL11A2	collagen, type XI, alpha 2	Hs.390171	ENSG00000227801, ENSG00000204248, ENSG00000206290, ENSG00000235708, ENSG00000223699, ENSG00000230930, ENSG00000232541	A_23_P42322	ref|Homo sapiens collagen, type XI, alpha 2 (COL11A2), transcript variant 1, mRNA [NM_080680]	-0.151207	0.900497	6.08291	-5.2924	0.000963976	0.00470185	-1.20937
29513	124976	SPNS2	spinster homolog 2 (Drosophila)	Hs.22824	ENSG00000183018	A_24_P230173	ref|Homo sapiens spinster homolog 2 (Drosophila) (SPNS2), mRNA [NM_001124758]	-0.150986	0.900635	5.22397	-6.29574	0.000330696	0.00212005	-0.0334483
13700	3065	HDAC1	histone deacetylase 1	Hs.88556	ENSG00000116478	A_23_P114656	ref|Homo sapiens histone deacetylase 1 (HDAC1), mRNA [NM_004964]	-0.150899	0.900689	12.3959	-6.27451	0.000337836	0.00215385	-0.0569713
30226	4983	OPHN1	oligophrenin 1	Hs.128824	ENSG00000079482	A_23_P417753	ref|Homo sapiens oligophrenin 1 (OPHN1), mRNA [NM_002547]	-0.150849	0.90072	4.96265	-5.7053	0.000611182	0.00333216	-0.709204
31984	284207	METRNL	meteorin, glial cell differentiation regulator-like	Hs.378821	ENSG00000176845	A_23_P10591	ref|Homo sapiens meteorin, glial cell differentiation regulator-like (METRNL), mRNA [NM_001004431]	-0.150791	0.900757	9.38029	-6.13172	0.000390568	0.00239656	-0.216671
40844	4862	NPAS2	neuronal PAS domain protein 2	Hs.156832, Hs.705895	ENSG00000170485	A_23_P415984	ref|Homo sapiens neuronal PAS domain protein 2 (NPAS2), mRNA [NM_002518]	-0.150777	0.900765	8.82574	-6.44075	0.000286196	0.00190562	0.125753
16657	642477	FLJ39632	hypothetical LOC642477	Hs.474095, Hs.536395	NA	A_24_P788227	gb|Homo sapiens cDNA clone IMAGE:5270501. [BC041856]	-0.150694	0.900817	8.59222	-7.30326	0.000126974	0.00105916	1.02171
38013	5602	MAPK10	mitogen-activated protein kinase 10	Hs.125503	ENSG00000109339	A_23_P45025	ref|Homo sapiens mitogen-activated protein kinase 10 (MAPK10), transcript variant 3, mRNA [NM_138980]	-0.150666	0.900834	4.87268	-6.12435	0.000393527	0.00240825	-0.224981
13947	27294	DHDH	dihydrodiol dehydrogenase (dimeric)	Hs.631555	ENSG00000104808	A_23_P67367	ref|Homo sapiens dihydrodiol dehydrogenase (dimeric) (DHDH), mRNA [NM_014475]	-0.150647	0.900846	6.53535	-6.41243	0.000294332	0.00194411	0.0948678
16109	55907	CMAS	cytidine monophosphate N-acetylneuraminic acid synthetase	Hs.311346	ENSG00000111726	A_32_P73045	ref|Homo sapiens cytidine monophosphate N-acetylneuraminic acid synthetase (CMAS), mRNA [NM_018686]	-0.150582	0.900887	7.56238	-4.57696	0.00224401	0.00891895	-2.13281
23072	5871	MAP4K2	mitogen-activated protein kinase kinase kinase kinase 2	Hs.534341	ENSG00000168067	A_24_P287075	ref|Homo sapiens mitogen-activated protein kinase kinase kinase kinase 2 (MAP4K2), mRNA [NM_004579]	-0.150551	0.900906	7.37888	-5.16621	0.00111306	0.00522909	-1.36694
22705	55014	STX17	syntaxin 17	Hs.704031	ENSG00000136874	A_23_P169358	ref|Homo sapiens syntaxin 17 (STX17), mRNA [NM_017919]	-0.150511	0.900931	8.38525	-5.50908	0.000756833	0.0039213	-0.943973
21092	79633	FAT4	FAT tumor suppressor homolog 4 (Drosophila)	Hs.563205	ENSG00000196159	A_23_P18649	ref|Homo sapiens FAT tumor suppressor homolog 4 (Drosophila) (FAT4), mRNA [NM_024582]	-0.150492	0.900943	5.66631	-4.22495	0.00349474	0.0126082	-2.6141
25688	55056	FLJ10038	hypothetical protein FLJ10038	Hs.511316	NA	A_23_P106280	gb|Homo sapiens cDNA FLJ10038 fis, clone HEMBA1000971. [AK000900]	-0.150391	0.901006	9.66244	-6.98224	0.000170281	0.00130988	0.69808
13375	1416	CRYBB2P1	crystallin, beta B2 pseudogene 1	Hs.571835	NA	A_24_P823219	gb|Homo sapiens crystallin, beta B2 pseudogene 1, mRNA (cDNA clone IMAGE:5288881). [BC047380]	-0.150281	0.901075	7.00142	-4.94378	0.00144191	0.0063749	-1.65019
42097	160762	CCDC63	coiled-coil domain containing 63	Hs.437141	ENSG00000173093	A_23_P345175	ref|Homo sapiens coiled-coil domain containing 63 (CCDC63), mRNA [NM_152591]	-0.150231	0.901106	4.84244	-5.65563	0.000644861	0.00348077	-0.768143
40001	11116	FGFR1OP	FGFR1 oncogene partner	Hs.487175	ENSG00000213066	A_23_P145134	ref|Homo sapiens FGFR1 oncogene partner (FGFR1OP), transcript variant 1, mRNA [NM_007045]	-0.150226	0.901109	9.40948	-7.24653	0.000133634	0.00109657	0.965329
3439	64170	CARD9	caspase recruitment domain family, member 9	Hs.694071	ENSG00000187796	A_23_P500433	ref|Homo sapiens caspase recruitment domain family, member 9 (CARD9), transcript variant 1, mRNA [NM_052813]	-0.149974	0.901267	5.9735	-3.88745	0.00543765	0.0178212	-3.09179
4793	64864	RFX7	regulatory factor X, 7	NA	ENSG00000181827	A_23_P26107	ref|Homo sapiens regulatory factor X, 7 (RFX7), mRNA [NM_022841]	-0.149916	0.901303	7.57851	-5.42348	0.000832107	0.00420474	-1.04803
2282	25981	DNAH1	dynein, axonemal, heavy chain 1	Hs.655469	ENSG00000114841	A_23_P18213	ref|Homo sapiens dynein, axonemal, heavy chain 1 (DNAH1), mRNA [NM_015512]	-0.149896	0.901315	6.2489	-6.74234	0.000213493	0.00154341	0.448739
40444	5170	PDPK1	3-phosphoinositide dependent protein kinase-1	Hs.459691	ENSG00000140992	A_24_P222599	ref|Homo sapiens 3-phosphoinositide dependent protein kinase-1 (PDPK1), transcript variant 1, mRNA [NM_002613]	-0.149877	0.901327	7.46597	-3.78666	0.00622554	0.019847	-3.23739
10904	54973	CPSF3L	cleavage and polyadenylation specific factor 3-like	Hs.6449	ENSG00000127054	A_23_P35030	ref|Homo sapiens cleavage and polyadenylation specific factor 3-like (CPSF3L), mRNA [NM_017871]	-0.14983	0.901356	9.27916	-5.75035	0.000582318	0.00320867	-0.656035
33892	57547	ZNF624	zinc finger protein 624	Hs.128078	ENSG00000197566	A_23_P153037	ref|Homo sapiens zinc finger protein 624 (ZNF624), mRNA [NM_020787]	-0.149776	0.901391	7.421	-6.10922	0.000399686	0.00243323	-0.242074
19266	7138	TNNT1	troponin T type 1 (skeletal, slow)	Hs.631558	ENSG00000105048	A_23_P56050	ref|Homo sapiens troponin T type 1 (skeletal, slow) (TNNT1), transcript variant 2, mRNA [NM_001126132]	-0.149738	0.901414	10.7663	-5.65461	0.000645577	0.00348261	-0.769361
8164	219333	USP12	ubiquitin specific peptidase 12	Hs.42400	ENSG00000152484	A_24_P237613	ref|Homo sapiens ubiquitin specific peptidase 12 (USP12), mRNA [NM_182488]	-0.149723	0.901423	9.66823	-7.12286	0.000149551	0.00119157	0.84123
6718	8557	TCAP	titin-cap (telethonin)	Hs.77628	ENSG00000173991	A_23_P107051	ref|Homo sapiens titin-cap (telethonin) (TCAP), mRNA [NM_003673]	-0.149447	0.901596	8.32756	-7.15269	0.000145526	0.00116787	0.871317
39118	51642	MRPL48	mitochondrial ribosomal protein L48	Hs.503239	ENSG00000175581	A_23_P162106	ref|Homo sapiens mitochondrial ribosomal protein L48 (MRPL48), nuclear gene encoding mitochondrial protein, mRNA [NM_016055]	-0.149321	0.901675	8.18191	-4.71966	0.00188493	0.00782024	-1.94276
35768	3712	IVD	isovaleryl-CoA dehydrogenase	Hs.513646	ENSG00000128928	A_23_P129322	ref|Homo sapiens isovaleryl Coenzyme A dehydrogenase (IVD), nuclear gene encoding mitochondrial protein, mRNA [NM_002225]	-0.149123	0.901798	6.15442	-5.21422	0.00105352	0.00502062	-1.30672
12701	150082	LCA5L	Leber congenital amaurosis 5-like	Hs.517284	ENSG00000157578	A_32_P48466	ref|Homo sapiens Leber congenital amaurosis 5-like (LCA5L), mRNA [NM_152505]	-0.149111	0.901806	5.39839	-4.68984	0.0019544	0.00803621	-1.98223
865	92340	C17orf72	chromosome 17 open reading frame 72	Hs.708161	ENSG00000224383	A_32_P27535	gb|Homo sapiens chromosome 17 open reading frame 72, mRNA (cDNA clone IMAGE:5299340). [BC045676]	-0.149089	0.90182	5.74299	-6.2312	0.00035294	0.0022229	-0.105139
8844	326625	MMAB	methylmalonic aciduria (cobalamin deficiency) cblB type	Hs.12106	ENSG00000139428	A_24_P56221	ref|Homo sapiens methylmalonic aciduria (cobalamin deficiency) cblB type (MMAB), nuclear gene encoding mitochondrial protein, mRNA [NM_052845]	-0.149075	0.901828	6.1966	-5.3834	0.000870182	0.00435804	-1.09712
7072	64122	FN3K	fructosamine 3 kinase	Hs.151135	ENSG00000167363	A_23_P89215	ref|Homo sapiens fructosamine 3 kinase (FN3K), mRNA [NM_022158]	-0.148849	0.90197	5.51912	-4.46562	0.0025764	0.009902	-2.28313
283	10902	BRD8	bromodomain containing 8	Hs.519337	ENSG00000112983	A_23_P145016	ref|Homo sapiens bromodomain containing 8 (BRD8), transcript variant 1, mRNA [NM_006696]	-0.148717	0.902052	10.5493	-6.2676	0.000340198	0.00216338	-0.0646451
30802	5834	PYGB	phosphorylase, glycogen; brain	Hs.368157	ENSG00000100994	A_23_P331670	ref|Homo sapiens phosphorylase, glycogen; brain (PYGB), mRNA [NM_002862]	-0.148629	0.902107	12.4422	-3.64088	0.00759133	0.0232305	-3.45022
8500	151325	MYADML	myeloid-associated differentiation marker-like	Hs.528847	NA	A_32_P332	ref|Homo sapiens myeloid-associated differentiation marker-like (MYADML), non-coding RNA [NR_003143]	-0.148495	0.902191	5.18198	-6.73216	0.000215581	0.00155358	0.438013
68	387263	C6orf120	chromosome 6 open reading frame 120	Hs.591375, Hs.694601	ENSG00000185127	A_24_P298846	ref|Homo sapiens chromosome 6 open reading frame 120 (C6orf120), mRNA [NM_001029863]	-0.148485	0.902197	9.13417	-4.83048	0.00164957	0.00706717	-1.7972
438	6895	TARBP2	TAR (HIV-1) RNA binding protein 2	Hs.326	ENSG00000139546	A_23_P87603	ref|Homo sapiens TAR (HIV-1) RNA binding protein 2 (TARBP2), transcript variant 1, mRNA [NM_134323]	-0.148403	0.902248	7.79801	-6.78832	0.000204341	0.0014967	0.497041
42601	3212	HOXB2	homeobox B2	Hs.514289	ENSG00000173917	A_23_P107283	ref|Homo sapiens homeobox B2 (HOXB2), mRNA [NM_002145]	-0.148362	0.902274	9.22661	-3.23498	0.0133982	0.0360856	-4.05532
18660	51225	ABI3	ABI family, member 3	Hs.130719	ENSG00000108798	A_23_P141429	ref|Homo sapiens ABI family, member 3 (ABI3), transcript variant 1, mRNA [NM_016428]	-0.148239	0.902351	5.13215	-4.07095	0.00426681	0.0147472	-2.83014
35331	84658	EMR3	egf-like module containing, mucin-like, hormone receptor-like 3	Hs.658712	ENSG00000131355	A_23_P218549	ref|Homo sapiens egf-like module containing, mucin-like, hormone receptor-like 3 (EMR3), mRNA [NM_032571]	-0.148211	0.902369	4.93696	-3.16953	0.0147139	0.0388194	-4.15435
40416	278	AMY1C	amylase, alpha 1C (salivary)	Hs.655232, Hs.662103	ENSG00000237763, ENSG00000174876, ENSG00000187733	A_23_P23611	ref|Homo sapiens amylase, alpha 1C (salivary) (AMY1C), mRNA [NM_001008219]	-0.148185	0.902385	5.12357	-5.18088	0.00109449	0.00516478	-1.34851
21046	1759	DNM1	dynamin 1	Hs.522413	ENSG00000106976	A_23_P135273	ref|Homo sapiens dynamin 1 (DNM1), transcript variant 2, mRNA [NM_001005336]	-0.148169	0.902395	6.86745	-5.05684	0.00126306	0.00576577	-1.50534
9162	9820	CUL7	cullin 7	Hs.520136	ENSG00000044090	A_23_P19348	ref|Homo sapiens cullin 7 (CUL7), mRNA [NM_014780]	-0.148107	0.902434	7.78949	-5.54729	0.000725694	0.00380625	-0.897847
27923	83544	DNAL1	dynein, axonemal, light chain 1	Hs.271270	ENSG00000119661	A_23_P25913	ref|Homo sapiens dynein, axonemal, light chain 1 (DNAL1), mRNA [NM_031427]	-0.147963	0.902524	6.67273	-6.60092	0.000244641	0.00170265	0.29863
19996	445815	PALM2-AKAP2	PALM2-AKAP2 readthrough	Hs.591908	ENSG00000157654	A_23_P342654	ref|Homo sapiens PALM2-AKAP2 readthrough transcript (PALM2-AKAP2), transcript variant 2, mRNA [NM_147150]	-0.147871	0.902581	10.0085	-2.24974	0.0574033	0.113276	-5.55942
38036	9166	EBAG9	estrogen receptor binding site associated, antigen, 9	Hs.409368	ENSG00000147654	A_24_P98263	ref|Homo sapiens estrogen receptor binding site associated, antigen, 9 (EBAG9), transcript variant 1, mRNA [NM_004215]	-0.147836	0.902604	7.71369	-6.49109	0.000272342	0.00183633	0.180422
14676	10224	ZNF443	zinc finger protein 443	Hs.720755	ENSG00000180855	A_23_P67278	ref|Homo sapiens zinc finger protein 443 (ZNF443), mRNA [NM_005815]	-0.147681	0.9027	5.93486	-6.64981	0.000233333	0.00164069	0.350788
29025	285386	TPRG1	tumor protein p63 regulated 1	Hs.729544	ENSG00000188001	A_24_P586712	ref|Homo sapiens tumor protein p63 regulated 1 (TPRG1), mRNA [NM_198485]	-0.147557	0.902778	11.8587	-5.79721	0.000553894	0.00309172	-0.601025
43202	170082	TCEANC	transcription elongation factor A (SII) N-terminal and central domain containing	Hs.222855	ENSG00000176896	A_24_P196469	gb|Homo sapiens cDNA FLJ39713 fis, clone SMINT2013170, weakly similar to TRANSCRIPTION FACTOR S-II-RELATED PROTEIN 4. [AK097032]	-0.147549	0.902783	4.8304	-5.75119	0.000581797	0.00320661	-0.655052
33720	79047	KCTD15	potassium channel tetramerisation domain containing 15	Hs.221873, Hs.606506	ENSG00000153885	A_23_P78871	ref|Homo sapiens potassium channel tetramerisation domain containing 15 (KCTD15), transcript variant 1, mRNA [NM_024076]	-0.147441	0.90285	6.92014	-3.81204	0.0060161	0.0193199	-3.20059
25213	81543	LRRC3	leucine rich repeat containing 3	Hs.326579	ENSG00000160233	A_23_P253597	ref|Homo sapiens leucine rich repeat containing 3 (LRRC3), mRNA [NM_030891]	-0.147369	0.902896	7.40332	-6.15614	0.000380933	0.00235677	-0.189173
5860	79184	BRCC3	BRCA1/BRCA2-containing complex, subunit 3	Hs.558537	ENSG00000185515	A_24_P144504	ref|Homo sapiens BRCA1/BRCA2-containing complex, subunit 3 (BRCC3), transcript variant 2, mRNA [NM_001018055]	-0.147214	0.902992	6.59018	-4.56013	0.00229109	0.00905457	-2.15542
29314	57698	KIAA1598	KIAA1598	Hs.501140	ENSG00000187164	A_23_P202587	ref|Homo sapiens KIAA1598 (KIAA1598), transcript variant 2, mRNA [NM_018330]	-0.147125	0.903048	8.73418	-3.00296	0.0187193	0.0468912	-4.40777
10396	5546	PRCC	papillary renal cell carcinoma (translocation-associated)	Hs.516948	ENSG00000143294	A_23_P23411	ref|Homo sapiens papillary renal cell carcinoma (translocation-associated) (PRCC), transcript variant 1, mRNA [NM_005973]	-0.147101	0.903063	8.7247	-3.82316	0.0059268	0.0190869	-3.18451
27234	875	CBS	cystathionine-beta-synthase	Hs.533013	ENSG00000160200	A_24_P48856	ref|Homo sapiens cystathionine-beta-synthase (CBS), mRNA [NM_000071]	-0.147079	0.903077	9.57982	-4.31428	0.00311768	0.011515	-2.49029
41677	147687	ZNF417	zinc finger protein 417	Hs.567710	ENSG00000173480	A_23_P404595	ref|Homo sapiens zinc finger protein 417 (ZNF417), mRNA [NM_152475]	-0.147004	0.903124	5.73132	-5.5043	0.000760836	0.00393485	-0.949764
39429	2740	GLP1R	glucagon-like peptide 1 receptor	Hs.389103	ENSG00000112164	A_23_P392402	ref|Homo sapiens glucagon-like peptide 1 receptor (GLP1R), mRNA [NM_002062]	-0.146986	0.903135	4.87481	-6.33505	0.000317913	0.00206002	0.00997263
43367	112703	FAM71E1	family with sequence similarity 71, member E1	Hs.448941	ENSG00000142530	A_24_P246351	ref|Homo sapiens family with sequence similarity 71, member E1 (FAM71E1), mRNA [NM_138411]	-0.146885	0.903199	6.04325	-6.16869	0.000376085	0.0023341	-0.175071
8022	165324	UBXN2A	UBX domain protein 2A	Hs.591576	ENSG00000173960	A_23_P131240	ref|Homo sapiens UBX domain protein 2A (UBXN2A), mRNA [NM_181713]	-0.146847	0.903222	6.1832	-3.98604	0.0047705	0.016132	-2.95066
21454	5475	PPEF1	protein phosphatase, EF-hand calcium binding domain 1	Hs.211589	ENSG00000086717	A_23_P125505	ref|Homo sapiens protein phosphatase, EF-hand calcium binding domain 1 (PPEF1), transcript variant 1, mRNA [NM_006240]	-0.146837	0.903229	5.2147	-4.84346	0.00162419	0.00698155	-1.78026
14186	23061	TBC1D9B	TBC1 domain family, member 9B (with GRAM domain)	Hs.155829	ENSG00000197226	A_24_P17722	ref|Homo sapiens TBC1 domain family, member 9B (with GRAM domain) (TBC1D9B), transcript variant 1, mRNA [NM_198868]	-0.146822	0.903238	10.0941	-4.36751	0.00291431	0.0109079	-2.41706
18910	29952	DPP7	dipeptidyl-peptidase 7	Hs.37916	ENSG00000176978	A_23_P32975	ref|Homo sapiens dipeptidyl-peptidase 7 (DPP7), mRNA [NM_013379]	-0.146756	0.903279	11.319	-3.21704	0.0137458	0.036839	-4.08242
16452	5365	PLXNB3	plexin B3	Hs.632833	ENSG00000198753	A_23_P137168	ref|Homo sapiens plexin B3 (PLXNB3), mRNA [NM_005393]	-0.1466	0.903377	5.56574	-6.75474	0.00021098	0.00153394	0.461792
10919	10564	ARFGEF2	ADP-ribosylation factor guanine nucleotide-exchange factor 2 (brefeldin A-inhibited)	Hs.62578	ENSG00000124198	A_23_P5995	ref|Homo sapiens ADP-ribosylation factor guanine nucleotide-exchange factor 2 (brefeldin A-inhibited) (ARFGEF2), mRNA [NM_006420]	-0.146586	0.903385	8.78913	-5.62157	0.000669143	0.00357977	-0.808748
41255	5870	RAB6A	RAB6A, member RAS oncogene family	Hs.503222, Hs.535586	ENSG00000175582	A_23_P203729	ref|Homo sapiens RAB6A, member RAS oncogene family (RAB6A), transcript variant 1, mRNA [NM_002869]	-0.14658	0.903389	6.09234	-3.98222	0.00479457	0.0162033	-2.95609
37390	84749	USP30	ubiquitin specific peptidase 30	Hs.486434, Hs.660996	ENSG00000135093	A_24_P390055	ref|Homo sapiens ubiquitin specific peptidase 30 (USP30), mRNA [NM_032663]	-0.146512	0.903432	7.3825	-7.08718	0.000154529	0.00121868	0.805117
38867	4782	NFIC	nuclear factor I/C (CCAAT-binding transcription factor)	Hs.170131	ENSG00000141905	A_23_P131115	ref|Homo sapiens nuclear factor I/C (CCAAT-binding transcription factor) (NFIC), transcript variant 1, mRNA [NM_005597]	-0.146498	0.903441	8.75865	-5.4548	0.00080365	0.00409818	-1.00985
25930	51291	GMIP	GEM interacting protein	Hs.49427	ENSG00000089639	A_23_P56228	ref|Homo sapiens GEM interacting protein (GMIP), mRNA [NM_016573]	-0.146366	0.903524	7.29773	-5.66516	0.000638244	0.00345279	-0.75681
14619	80349	WDR61	WD repeat domain 61	Hs.513055	ENSG00000140395	A_23_P49021	ref|Homo sapiens WD repeat domain 61 (WDR61), mRNA [NM_025234]	-0.14633	0.903546	9.04204	-6.52935	0.000262313	0.00178554	0.221766
20639	3177	SLC29A2	solute carrier family 29 (nucleoside transporters), member 2	Hs.569017	ENSG00000174669	A_23_P104705	ref|Homo sapiens solute carrier family 29 (nucleoside transporters), member 2 (SLC29A2), mRNA [NM_001532]	-0.146276	0.90358	9.6933	-4.92606	0.0014724	0.00647803	-1.67306
32655	50832	TAS2R4	taste receptor, type 2, member 4	Hs.669863	ENSG00000127364	A_23_P20101	ref|Homo sapiens taste receptor, type 2, member 4 (TAS2R4), mRNA [NM_016944]	-0.146254	0.903594	5.30079	-6.75401	0.000211128	0.0015345	0.46102
32784	325	APCS	amyloid P component, serum	Hs.507080	ENSG00000132703	A_23_P96827	ref|Homo sapiens amyloid P component, serum (APCS), mRNA [NM_001639]	-0.1462	0.903628	5.16716	-6.42332	0.000291172	0.00192942	0.106759
25481	3754	KCNF1	potassium voltage-gated channel, subfamily F, member 1	Hs.23735	ENSG00000162975	A_23_P142765	ref|Homo sapiens potassium voltage-gated channel, subfamily F, member 1 (KCNF1), mRNA [NM_002236]	-0.146188	0.903635	5.02781	-5.51864	0.000748906	0.00389316	-0.932414
11130	10392	NOD1	nucleotide-binding oligomerization domain containing 1	Hs.405153	ENSG00000106100	A_24_P129277	ref|Homo sapiens nucleotide-binding oligomerization domain containing 1 (NOD1), mRNA [NM_006092]	-0.146146	0.903661	6.86386	-6.16267	0.000378402	0.00234412	-0.181834
22555	255104	TMCO4	transmembrane and coiled-coil domains 4	Hs.656313	ENSG00000162542	A_23_P158277	ref|Homo sapiens transmembrane and coiled-coil domains 4 (TMCO4), mRNA [NM_181719]	-0.146098	0.903691	7.83449	-6.92755	0.000179196	0.00135813	0.641814
18561	8495	PPFIBP2	PTPRF interacting protein, binding protein 2 (liprin beta 2)	Hs.655714	ENSG00000166387	A_23_P409623	ref|Homo sapiens PTPRF interacting protein, binding protein 2 (liprin beta 2) (PPFIBP2), mRNA [NM_003621]	-0.146053	0.90372	7.47325	-4.72727	0.00186763	0.00776481	-1.9327
1492	7639	ZNF85	zinc finger protein 85	Hs.37138	ENSG00000253145, ENSG00000105750	A_23_P67702	ref|Homo sapiens zinc finger protein 85 (ZNF85), mRNA [NM_003429]	-0.145846	0.903849	6.68168	-4.86049	0.00159154	0.00687389	-1.75808
33641	55717	WDR11	WD repeat domain 11	Hs.144447	ENSG00000120008	A_23_P63929	ref|Homo sapiens bromodomain and WD repeat domain containing 2 (BRWD2), mRNA [NM_018117]	-0.145838	0.903854	8.60909	-5.47334	0.000787308	0.00403477	-0.987305
36639	150677	OTOS	otospiralin	Hs.148586	ENSG00000178602	A_23_P90997	ref|Homo sapiens otospiralin (OTOS), mRNA [NM_148961]	-0.145626	0.903987	5.475	-5.98586	0.000454076	0.00267045	-0.382479
36732	1786	DNMT1	DNA (cytosine-5-)-methyltransferase 1	Hs.202672	ENSG00000130816	A_24_P408083	ref|Homo sapiens DNA (cytosine-5-)-methyltransferase 1 (DNMT1), transcript variant 2, mRNA [NM_001379]	-0.145441	0.904103	8.81038	-4.92697	0.00147081	0.006473	-1.67188
18769	404734	ANKHD1-EIF4EBP3	ANKHD1-EIF4EBP3 readthrough	Hs.594084	ENSG00000249536, ENSG00000131503, ENSG00000254996	A_23_P58443	ref|Homo sapiens ANKHD1-EIF4EBP3 readthrough transcript (ANKHD1-EIF4EBP3), mRNA [NM_020690]	-0.145437	0.904105	8.69535	-6.50684	0.000268162	0.00181491	0.197465
15455	148979	GLIS1	GLIS family zinc finger 1	Hs.306691	ENSG00000174332	A_23_P316612	ref|Homo sapiens GLIS family zinc finger 1 (GLIS1), mRNA [NM_147193]	-0.145383	0.904139	5.64188	-6.75001	0.000211935	0.00153804	0.456816
9799	683	BST1	bone marrow stromal cell antigen 1	Hs.720344	ENSG00000109743	A_23_P7325	ref|Homo sapiens bone marrow stromal cell antigen 1 (BST1), mRNA [NM_004334]	-0.145324	0.904176	5.9354	-4.67453	0.00199116	0.00815568	-2.00255
4859	8089	YEATS4	YEATS domain containing 4	Hs.4029	ENSG00000127337	A_23_P87591	ref|Homo sapiens YEATS domain containing 4 (YEATS4), mRNA [NM_006530]	-0.145205	0.904251	8.05136	-5.82672	0.000536785	0.00302148	-0.566527
11169	441108	C5orf56	chromosome 5 open reading frame 56	Hs.658288, Hs.708847, Hs.729227	ENSG00000197536	A_24_P941866	ref|Homo sapiens hypothetical gene supported by AK128882 (LOC441108), mRNA [NM_001013717]	-0.145156	0.904282	6.1703	-5.69895	0.000615375	0.00335249	-0.716718
21448	51100	SH3GLB1	SH3-domain GRB2-like endophilin B1	Hs.136309	ENSG00000097033	A_23_P22957	ref|Homo sapiens SH3-domain GRB2-like endophilin B1 (SH3GLB1), mRNA [NM_016009]	-0.145128	0.904299	9.56277	-6.53392	0.000261142	0.00178029	0.226697
12895	54901	CDKAL1	CDK5 regulatory subunit associated protein 1-like 1	Hs.657604	ENSG00000145996	A_32_P128310	ref|Homo sapiens CDK5 regulatory subunit associated protein 1-like 1 (CDKAL1), mRNA [NM_017774]	-0.145089	0.904324	7.27373	-5.88996	0.000502066	0.00287342	-0.492998
33676	10870	HCST	hematopoietic cell signal transducer	Hs.117339	ENSG00000126264	A_23_P39386	ref|Homo sapiens hematopoietic cell signal transducer (HCST), transcript variant 1, mRNA [NM_014266]	-0.144919	0.90443	6.01035	-6.08061	0.000411623	0.00248465	-0.274465
42854	199692	ZNF627	zinc finger protein 627	Hs.526665	ENSG00000198551	A_23_P135730	ref|Homo sapiens zinc finger protein 627 (ZNF627), mRNA [NM_145295]	-0.144815	0.904495	8.55671	-5.53231	0.000737729	0.00385214	-0.915906
34823	9706	ULK2	unc-51-like kinase 2 (C. elegans)	Hs.168762	ENSG00000083290	A_24_P932594	ref|Homo sapiens unc-51-like kinase 2 (C. elegans) (ULK2), transcript variant 1, mRNA [NM_014683]	-0.144722	0.904554	6.12297	-3.72891	0.00673187	0.0211289	-3.32138
14468	84305	WIBG	within bgcn homolog (Drosophila)	Hs.505687, Hs.524488	ENSG00000170473	A_23_P13632	ref|Homo sapiens within bgcn homolog (Drosophila) (WIBG), transcript variant 1, mRNA [NM_032345]	-0.144699	0.904568	8.87838	-6.90384	0.000183222	0.00138024	0.617318
13548	375260	WASH2P	WAS protein family homolog 2 pseudogene	Hs.446466, Hs.459573, Hs.709408	NA	A_24_P24831	ref|Homo sapiens WAS protein family homolog 1 (WASH1), mRNA [NM_182905]	-0.144568	0.90465	12.5383	-4.85819	0.00159589	0.00688789	-1.76107
24995	10633	RASL10A	RAS-like, family 10, member A	Hs.73088	ENSG00000100276	A_23_P166400	ref|Homo sapiens RAS-like, family 10, member A (RASL10A), transcript variant 2, mRNA [NM_001007279]	-0.14451	0.904687	8.44938	-3.72736	0.00674614	0.0211645	-3.32365
40647	401027	C2orf66	chromosome 2 open reading frame 66	Hs.372069	ENSG00000187944	A_32_P223464	ref|Homo sapiens chromosome 2 open reading frame 66 (C2orf66), mRNA [NM_213608]	-0.144474	0.904709	5.59491	-4.40254	0.0027884	0.0105394	-2.36908
38831	9865	TRIL	TLR4 interactor with leucine-rich repeats	NA	NA	A_24_P183664	ref|Homo sapiens KIAA0644 gene product (KIAA0644), mRNA [NM_014817]	-0.144419	0.904744	4.8601	-2.65236	0.0313751	0.0703685	-4.94508
12061	55122	AKIRIN2	akirin 2	Hs.485915	ENSG00000135334	A_23_P428819	ref|Homo sapiens akirin 2 (AKIRIN2), mRNA [NM_018064]	-0.14429	0.904825	8.93961	-5.47365	0.000787037	0.00403386	-0.986927
18082	5886	RAD23A	RAD23 homolog A (S. cerevisiae)	Hs.643267	ENSG00000179262	A_24_P22887	ref|Homo sapiens RAD23 homolog A (S. cerevisiae) (RAD23A), mRNA [NM_005053]	-0.143997	0.905008	8.98868	-6.03688	0.000430638	0.00256827	-0.324165
28114	221545	C6orf136	chromosome 6 open reading frame 136	Hs.591787	ENSG00000233164, ENSG00000206487, ENSG00000237100, ENSG00000204564, ENSG00000224120, ENSG00000233641, ENSG00000237012	A_23_P300826	ref|Homo sapiens chromosome 6 open reading frame 136 (C6orf136), transcript variant 2, mRNA [NM_145029]	-0.14399	0.905012	8.53091	-6.04733	0.000426007	0.00254735	-0.312266
33980	8608	RDH16	retinol dehydrogenase 16 (all-trans)	Hs.134958	ENSG00000139547	A_23_P36484	ref|Homo sapiens retinol dehydrogenase 16 (all-trans) (RDH16), mRNA [NM_003708]	-0.143939	0.905044	6.23147	-3.36546	0.0111343	0.0311779	-3.85899
29370	84883	AIFM2	apoptosis-inducing factor, mitochondrion-associated, 2	Hs.650680	ENSG00000042286	A_23_P138567	ref|Homo sapiens apoptosis-inducing factor, mitochondrion-associated, 2 (AIFM2), nuclear gene encoding mitochondrial protein, mRNA [NM_032797]	-0.1439	0.905069	9.68372	-4.80789	0.00169479	0.00721431	-1.82672
16584	60484	HAPLN2	hyaluronan and proteoglycan link protein 2	Hs.410719	ENSG00000132702	A_23_P149232	ref|Homo sapiens hyaluronan and proteoglycan link protein 2 (HAPLN2), mRNA [NM_021817]	-0.143863	0.905092	5.26391	-3.47675	0.00952562	0.0276964	-3.69283
[truncated: 16,934 more rows]
