# Supplementary material for: Identification of miR-145 targets through an integrated omics analysis
Source: Royal Society of Chemistry journal article supplement (doi:10.1039/c4mb00585f), 2014-10-23
Supplement: c4mb00585f4.xlsx [file c4mb00585f4.xlsx]

## Sheet: mir145.48hr.nr.txt
SystematicName	logFC	AveExpr	t	P.Value	adj.P.Val	B
hsa-let-7a	-0.384137	9.78412	-3.55127	0.00655135	0.0730616	-3.50865
hsa-let-7a*	0.114367	4.31116	2.68375	0.0257984	0.157663	-4.92384
hsa-let-7b	-0.303465	8.03258	-6.05997	0.000216265	0.0111834	0.140798
hsa-let-7b*	0.065497	4.33298	1.60769	0.143539	0.381022	-6.58355
hsa-let-7c	-0.210843	6.08201	-4.24732	0.00232413	0.0441058	-2.41292
hsa-let-7c*	0.214152	4.37932	4.5517	0.00150942	0.0357202	-1.95228
hsa-let-7d	-0.374988	9.25225	-4.84995	0.00100192	0.0299352	-1.51316
hsa-let-7d*	0.12963	4.35736	2.37366	0.0425806	0.207051	-5.42603
hsa-let-7e	-1.20592	6.52954	-21.1513	8.81e-09	2.96e-06	10.9932
hsa-let-7e*	0.104794	4.2948	2.4433	0.038046	0.194741	-5.31413
hsa-let-7f	-0.107759	6.16483	-1.47355	0.175849	0.424677	-6.76416
hsa-let-7f-1*	0.12332	4.3646	3.00441	0.0154259	0.116517	-4.39882
hsa-let-7f-2*	0.259101	4.48797	5.3159	0.000541963	0.0191755	-0.852067
hsa-let-7g	-0.160209	5.77692	-2.71582	0.0244988	0.154279	-4.87147
hsa-let-7g*	0.0867318	4.30591	2.05611	0.0709994	0.268698	-5.92575
hsa-let-7i	-0.385995	11.4778	-6.56248	0.000121118	0.00775445	0.769305
hsa-let-7i*	-0.115956	4.27395	-2.54559	0.0322463	0.175883	-5.14872
hsa-miR-1	0.179595	4.39417	4.6551	0.00130759	0.0334868	-1.79866
hsa-miR-100	-0.142506	4.826	-3.88065	0.00397883	0.0581471	-2.98344
hsa-miR-100*	0.083071	4.34146	2.02195	0.074984	0.273957	-5.97819
hsa-miR-101	-0.132662	4.56095	-3.11501	0.0129409	0.106092	-4.21768
hsa-miR-101*	-0.142777	4.30597	-3.04405	0.0144829	0.112986	-4.33387
hsa-miR-103	-0.452653	8.06503	-6.95118	7.9e-05	0.00574663	1.23354
hsa-miR-103-as	0.0228067	4.29074	0.52113	0.615283	0.799194	-7.6941
hsa-miR-105	-0.117041	4.28674	-2.27295	0.0501021	0.22284	-5.58659
hsa-miR-105*	0.194936	4.32613	4.2376	0.00235689	0.0443195	-2.42782
hsa-miR-106a*	0.319372	4.35066	4.46911	0.0016947	0.0367593	-2.07605
hsa-miR-106b	-0.234473	9.24094	-4.76833	0.00111938	0.0320215	-1.6321
hsa-miR-106b*	-0.0365948	4.25649	-0.890939	0.396939	0.637615	-7.42015
hsa-miR-107	-0.350138	7.47137	-6.76367	9.69e-05	0.0066783	1.01191
hsa-miR-10a	-0.206123	7.24505	-3.94494	0.00361595	0.0552459	-2.88226
hsa-miR-10a*	-0.144354	4.42975	-2.57207	0.0308958	0.17165	-5.10575
hsa-miR-10b	-0.0757475	4.45825	-1.93556	0.0860374	0.291269	-6.10931
hsa-miR-10b*	0.184966	4.91221	4.49913	0.00162468	0.0366657	-2.03096
hsa-miR-1178	-0.0942225	4.30661	-2.21915	0.0546433	0.232072	-5.67167
hsa-miR-1179	-0.0690524	4.34961	-1.76889	0.111866	0.333311	-6.35555
hsa-miR-1180	0.0855917	4.33347	1.89145	0.0922637	0.30036	-6.1754
hsa-miR-1181	0.100228	5.5934	1.34206	0.213557	0.463108	-6.93189
hsa-miR-1182	-0.0431159	4.35057	-0.834503	0.426324	0.663417	-7.47007
hsa-miR-1183	-0.107418	4.58298	-2.41918	0.0395593	0.199578	-5.35295
hsa-miR-1184	0.0615445	4.27858	1.56492	0.15321	0.393099	-6.6421
hsa-miR-1185	-0.0663849	4.31785	-1.41472	0.19194	0.44038	-6.84042
hsa-miR-1197	-0.0711158	4.27692	-1.65512	0.13346	0.367698	-6.51762
hsa-miR-1200	-0.112221	4.27272	-2.87564	0.0189497	0.133742	-4.60988
hsa-miR-1201	-0.073027	4.30792	-1.75373	0.114544	0.336031	-6.37745
hsa-miR-1202	0.38339	7.8319	4.87512	0.000968435	0.0294975	-1.47666
hsa-miR-1203	-0.0700313	4.32617	-1.30282	0.226074	0.475122	-6.97998
hsa-miR-1204	-0.132891	4.31562	-3.04126	0.0145472	0.112986	-4.33844
hsa-miR-1205	-0.0823937	4.35532	-1.89895	0.0911764	0.298881	-6.16421
hsa-miR-1206	-0.0830146	4.30486	-2.00324	0.0772556	0.277357	-6.00676
hsa-miR-1207-3p	-0.0685	4.30294	-1.58183	0.149318	0.387938	-6.61905
hsa-miR-1207-5p	0.345811	8.288	5.08958	0.00072762	0.0244571	-1.16935
hsa-miR-1208	-0.0845198	4.51489	-1.96111	0.0826165	0.286283	-6.07077
hsa-miR-122	0.098658	4.33025	1.96363	0.0822856	0.285887	-6.06695
hsa-miR-122*	0.0738452	4.36579	1.71486	0.121684	0.347222	-6.43317
hsa-miR-1224-3p	0.125993	4.26535	2.87139	0.019079	0.134302	-4.61684
hsa-miR-1224-5p	-0.11665	5.3326	-1.71879	0.120945	0.345979	-6.42758
hsa-miR-1225-3p	0.11148	4.71143	2.53126	0.0330023	0.177453	-5.17197
hsa-miR-1225-5p	0.937716	10.6813	6.34654	0.000154788	0.00904839	0.503233
hsa-miR-1226	0.122148	4.29404	3.12628	0.0127121	0.105207	-4.19924
hsa-miR-1226*	0.117142	4.87766	2.5315	0.0329891	0.177453	-5.17157
hsa-miR-1227	0.0848558	4.32328	2.09254	0.0669768	0.259885	-5.86952
hsa-miR-1228	0.0751162	5.21696	1.46732	0.177497	0.427436	-6.77234
hsa-miR-1228*	-0.172149	4.32862	-3.70974	0.00514466	0.0672431	-3.25462
hsa-miR-1229	0.0263905	4.53487	0.592744	0.568442	0.773068	-7.65123
hsa-miR-1231	-0.0928228	4.24629	-2.59631	0.029709	0.16867	-5.06634
hsa-miR-1233	-0.047945	4.26725	-1.16586	0.274647	0.528052	-7.14003
hsa-miR-1234	0.0864291	4.84729	1.16531	0.274857	0.528052	-7.14065
hsa-miR-1236	-0.0715702	4.28333	-1.89669	0.091503	0.298955	-6.16759
hsa-miR-1237	-0.0417923	4.5023	-0.855743	0.415092	0.655422	-7.4516
hsa-miR-1238	-0.117478	4.61856	-2.35398	0.0439571	0.208467	-5.45754
hsa-miR-124	3.12212	5.8671	59.5863	1.15e-12	7.75e-10	18.9897
hsa-miR-124*	0.199327	4.31715	4.80901	0.00105909	0.0306226	-1.57271
hsa-miR-1243	0.0450618	4.33177	1.05203	0.321134	0.569987	-7.26309
hsa-miR-1244	0.0395462	4.31399	0.964834	0.360687	0.605045	-7.35071
hsa-miR-1245	-0.0696765	4.32468	-1.50928	0.166667	0.411541	-6.71694
hsa-miR-1246	-0.122367	4.62838	-2.47363	0.0362252	0.189882	-5.2652
hsa-miR-1247	0.108556	4.30561	2.70861	0.0247851	0.154994	-4.88326
hsa-miR-1248	-0.109068	4.30578	-2.97615	0.0161365	0.11791	-4.44513
hsa-miR-1249	0.0844372	5.34329	1.67024	0.130384	0.363285	-6.49639
hsa-miR-1250	-0.214288	4.34256	-3.6536	0.00560254	0.070111	-3.34434
hsa-miR-1251	-0.0511803	4.25774	-0.89345	0.395666	0.637615	-7.41786
hsa-miR-1252	0.0434246	4.36945	1.19683	0.262977	0.516708	-7.10494
hsa-miR-1253	0.0765109	4.28329	1.36841	0.205487	0.453398	-6.89907
hsa-miR-1254	-0.0338065	4.29945	-0.792897	0.448926	0.683807	-7.50509
hsa-miR-1255a	0.0823698	4.36289	1.13374	0.287188	0.541549	-7.17572
hsa-miR-1255b	-0.163472	4.30749	-4.39181	0.00189036	0.0394046	-2.19272
hsa-miR-1256	0.111359	4.31621	3.12611	0.0127156	0.105207	-4.19952
hsa-miR-1257	0.0130822	4.32259	0.255483	0.804289	0.907568	-7.80676
hsa-miR-1258	-0.0322992	4.30319	-0.621678	0.550099	0.761306	-7.63247
hsa-miR-1259	-0.0839256	4.29671	-1.43986	0.184914	0.435405	-6.80807
hsa-miR-125a-3p	1.58176	6.84517	35.376	1.06e-10	5.68e-08	15.3304
hsa-miR-125a-5p	-0.388874	7.06396	-6.00113	0.000231939	0.0112297	0.0650293
hsa-miR-125b	-0.089005	4.29899	-2.13384	0.0626814	0.251944	-5.80536
hsa-miR-125b-1*	-0.107194	4.31307	-2.65498	0.0270241	0.16077	-4.97079
hsa-miR-125b-2*	0.0918825	4.31979	1.84621	0.0990907	0.312374	-6.24252
hsa-miR-126	-0.150835	5.45466	-4.08889	0.00292503	0.0493042	-2.65742
hsa-miR-126*	-0.0732174	4.40748	-1.40541	0.1946	0.442846	-6.85231
hsa-miR-1260	-0.0750662	8.11289	-0.879829	0.402607	0.643263	-7.43019
hsa-miR-1261	-0.0449056	4.3605	-1.22356	0.25323	0.505615	-7.07412
hsa-miR-1262	0.307526	4.63653	2.03582	0.0733413	0.271839	-5.95694
hsa-miR-1263	0.117105	4.26531	2.11851	0.0642437	0.255172	-5.82923
hsa-miR-1264	-0.0343196	4.32588	-0.918197	0.383273	0.62435	-7.39506
hsa-miR-1265	-0.0704932	4.28879	-1.47707	0.174927	0.424529	-6.75955
hsa-miR-1266	-0.080957	4.28401	-1.93921	0.0855401	0.291269	-6.10381
hsa-miR-1267	0.0701856	4.30626	1.8403	0.100017	0.314078	-6.25123
hsa-miR-1268	0.159345	7.62963	3.27304	0.0100887	0.0921216	-3.95956
hsa-miR-1269	-0.152315	4.28434	-3.32502	0.00930066	0.0878794	-3.87493
hsa-miR-127-3p	-0.0924684	4.32583	-1.9118	0.0893405	0.294769	-6.14499
hsa-miR-127-5p	0.106212	4.31449	2.28608	0.0490518	0.221725	-5.56576
hsa-miR-1270	0.10506	4.30825	2.78085	0.022064	0.145061	-4.76513
hsa-miR-1271	0.117857	4.30923	2.32108	0.0463564	0.215289	-5.51006
hsa-miR-1272	0.104718	4.28317	2.52581	0.0332943	0.178343	-5.1808
hsa-miR-1273	-0.0707377	4.31305	-1.37267	0.204208	0.451969	-6.89374
hsa-miR-1274a	-0.189553	9.29722	-4.29406	0.00217319	0.0430425	-2.34139
hsa-miR-1274b	-0.571653	11.4723	-6.9539	7.87e-05	0.00574663	1.23673
hsa-miR-1275	0.165421	7.88577	2.96506	0.0164247	0.11909	-4.46331
hsa-miR-1276	-0.0533749	4.34565	-0.990887	0.348506	0.592904	-7.32516
hsa-miR-1277	-0.0255859	4.33872	-0.672086	0.518981	0.737601	-7.59784
hsa-miR-1278	0.171662	4.36987	3.17877	0.0117007	0.101494	-4.11342
hsa-miR-1279	0.0363435	4.30284	1.02269	0.334057	0.58141	-7.29324
hsa-miR-128	-0.194094	5.56802	-3.69739	0.00524191	0.0679655	-3.27433
hsa-miR-1280	-0.0667278	6.06465	-1.1309	0.288316	0.542535	-7.17883
hsa-miR-1281	-0.0707832	4.64656	-1.59294	0.14681	0.385144	-6.60384
hsa-miR-1282	0.0599045	4.33102	1.56189	0.153919	0.393572	-6.64622
hsa-miR-1283	-0.0491343	4.27238	-0.917123	0.383805	0.62435	-7.39606
hsa-miR-1284	0.047337	4.29404	1.19541	0.263502	0.516708	-7.10656
hsa-miR-1285	-0.0769646	4.35552	-1.39562	0.197431	0.444632	-6.86476
hsa-miR-1286	-0.10786	4.30238	-2.54148	0.0324616	0.176342	-5.1554
hsa-miR-1287	-0.0533949	4.48049	-1.15761	0.277823	0.530964	-7.14926
hsa-miR-1288	-0.121066	5.24647	-1.76764	0.112085	0.333403	-6.35736
hsa-miR-1289	0.129869	4.3054	3.40647	0.00819275	0.0825105	-3.74265
hsa-miR-129-3p	0.0406167	4.34117	1.10309	0.299573	0.551395	-7.20907
hsa-miR-129-5p	0.116905	4.31028	2.64741	0.0273562	0.161583	-4.98313
hsa-miR-129*	-0.0659813	4.32658	-1.73838	0.117317	0.33921	-6.39953
hsa-miR-1290	0.0566958	5.07207	1.53686	0.15987	0.400644	-6.68003
hsa-miR-1291	0.0771291	4.33407	1.83895	0.100229	0.314078	-6.25322
hsa-miR-1292	-0.0730049	4.27079	-1.93059	0.0867185	0.29258	-6.11679
hsa-miR-1293	-0.0580369	4.32501	-1.43031	0.187555	0.437791	-6.8204
hsa-miR-1294	-0.0878068	4.29219	-1.88508	0.0931971	0.302666	-6.18489
hsa-miR-1295	-0.0128913	4.43747	-0.25274	0.806341	0.908181	-7.80753
hsa-miR-1296	-0.0568455	4.29322	-1.42522	0.188976	0.438428	-6.82695
hsa-miR-1297	0.134219	4.30171	3.55455	0.00651841	0.0730616	-3.50337
hsa-miR-1298	0.0979412	4.29376	2.43065	0.0388326	0.197003	-5.33451
hsa-miR-1299	-0.0282643	4.49902	-0.556174	0.592111	0.787788	-7.67376
hsa-miR-1300_v13.0	-0.021122	5.14278	-0.387827	0.707465	0.853082	-7.75995
hsa-miR-1301	0.0488212	4.36427	1.17426	0.27144	0.525866	-7.13058
hsa-miR-1302	-0.0919847	4.30973	-2.05378	0.0712652	0.268698	-5.92935
hsa-miR-1303	-0.0343721	4.33188	-0.860211	0.412756	0.653038	-7.44767
hsa-miR-1304	0.117312	4.27148	2.77482	0.0222789	0.145408	-4.77499
hsa-miR-1305	-0.0106744	6.17942	-0.255855	0.804011	0.907568	-7.80665
hsa-miR-1306	-0.0483912	4.37268	-1.23191	0.25025	0.502932	-7.0644
hsa-miR-1307	0.0717345	4.2975	1.32688	0.218327	0.465199	-6.95061
hsa-miR-1308	-0.864717	10.0258	-13.8522	3.17e-07	5.68e-05	7.21418
hsa-miR-130a	-0.289245	6.73499	-7.87061	3.07e-05	0.00294638	2.26132
hsa-miR-130a*	-0.0903661	4.32273	-2.27409	0.0500104	0.22284	-5.58479
hsa-miR-130b	-0.261111	7.13361	-6.02668	0.000224984	0.0112034	0.0979947
hsa-miR-130b*	0.0962581	4.32363	2.08951	0.0673023	0.260023	-5.87421
hsa-miR-132	-0.0987013	4.80754	-2.37902	0.0422135	0.206011	-5.41745
hsa-miR-132*	-0.0776894	4.33996	-1.88138	0.0937432	0.303433	-6.19039
hsa-miR-1321	-0.0292895	4.39702	-0.562753	0.587813	0.786426	-7.66981
hsa-miR-1322	0.124436	4.26779	3.10592	0.0131286	0.106655	-4.23256
hsa-miR-1323	-0.023941	4.36857	-0.523418	0.613756	0.798301	-7.69281
hsa-miR-1324	0.0958166	4.3333	1.89595	0.0916099	0.298955	-6.16869
hsa-miR-133a	0.689884	4.69836	15.1392	1.5e-07	2.89e-05	8.01102
hsa-miR-133b	2.37668	5.60004	60.2227	1.05e-12	7.75e-10	19.0529
hsa-miR-134	0.313126	5.96713	6.26391	0.000170278	0.00953914	0.399831
hsa-miR-135a	0.0266165	4.35086	0.697654	0.503615	0.729434	-7.57934
hsa-miR-135a*	-0.114247	4.95859	-1.78732	0.108689	0.327678	-6.32881
hsa-miR-135b	-0.258985	4.97628	-5.50748	0.000424737	0.0165949	-0.589117
hsa-miR-135b*	-0.112877	4.31251	-2.98793	0.0158362	0.11731	-4.42583
hsa-miR-136	0.136896	4.36285	3.13608	0.0125167	0.104852	-4.18322
hsa-miR-136*	-0.102825	4.32521	-2.21094	0.0553706	0.233031	-5.6846
hsa-miR-137	-0.244051	4.79151	-6.03684	0.000222283	0.0112034	0.111075
hsa-miR-138	0.101999	4.92795	1.45357	0.181177	0.430755	-6.79028
hsa-miR-138-1*	-0.132892	4.26367	-3.7819	0.00461347	0.0634117	-3.13974
hsa-miR-138-2*	-0.0691415	4.31196	-1.47392	0.175754	0.424677	-6.76368
hsa-miR-139-3p	-0.0930792	4.29964	-2.06666	0.0698107	0.265518	-5.9095
hsa-miR-139-5p	0.0949343	4.31042	2.3954	0.0411099	0.202463	-5.39116
hsa-miR-140-3p	-0.0846778	4.61999	-2.20818	0.0556175	0.233316	-5.68895
hsa-miR-140-5p	-0.162204	5.02545	-3.78404	0.00459865	0.0634117	-3.13635
hsa-miR-141	-0.105359	4.50278	-2.16563	0.0595601	0.244142	-5.75573
hsa-miR-141*	0.148766	4.30473	2.33516	0.0453143	0.212196	-5.48761
hsa-miR-142-3p	-0.0991397	4.33524	-2.27721	0.0497589	0.22284	-5.57984
hsa-miR-142-5p	-0.10103	4.29491	-2.23558	0.0532154	0.228538	-5.64575
hsa-miR-143	-0.296524	4.33955	-6.83024	9e-05	0.00637204	1.09109
hsa-miR-143*	0.0710727	4.32381	1.74494	0.116125	0.338309	-6.39011
hsa-miR-144	-0.0145489	4.31442	-0.344825	0.738418	0.868662	-7.77722
hsa-miR-144*	-0.100633	4.33771	-2.21698	0.0548343	0.232204	-5.67508
hsa-miR-145	8.5222	8.66955	109.84	5.68e-15	1.53e-11	21.7632
hsa-miR-145*	0.104937	4.35575	2.41104	0.0400838	0.200717	-5.36605
hsa-miR-1468	0.0198319	4.284	0.424925	0.68121	0.840649	-7.74348
hsa-miR-1469	0.168756	4.83994	4.4947	0.00163482	0.0366657	-2.03761
hsa-miR-146a	-0.190918	4.48322	-3.56867	0.00637873	0.0727838	-3.48064
hsa-miR-146a*	-0.188555	4.3346	-5.32933	0.000532692	0.0190988	-0.833465
hsa-miR-146b-3p	0.171476	4.33064	4.2661	0.00226217	0.0434497	-2.38414
hsa-miR-146b-5p	0.117475	4.35337	2.53474	0.0328171	0.177453	-5.16632
hsa-miR-147	0.0673035	4.31377	1.63698	0.137236	0.371413	-6.54295
hsa-miR-1470	0.0999925	4.4328	1.76977	0.111712	0.333311	-6.35427
hsa-miR-1471	-0.0532991	4.39232	-0.991263	0.348332	0.592904	-7.32479
hsa-miR-147b	-0.111517	4.3253	-2.4911	0.0352164	0.18573	-5.23698
hsa-miR-148a	-0.319714	4.90442	-7.4168	4.84e-05	0.0039429	1.76591
hsa-miR-148a*	0.0836239	4.27502	1.97224	0.081166	0.284702	-6.0539
hsa-miR-148b	-0.218201	4.87774	-4.52891	0.00155826	0.0358133	-1.98634
hsa-miR-148b*	-0.0936164	4.29494	-1.53886	0.159387	0.399805	-6.67734
hsa-miR-149	-0.481043	5.50717	-9.80973	5.39e-06	0.000805766	4.15109
hsa-miR-149*	-0.157718	4.29042	-4.24583	0.00232913	0.0441058	-2.4152
hsa-miR-150	-0.0966852	4.27784	-1.94236	0.0851143	0.291186	-6.09908
hsa-miR-150*	0.194125	6.3321	2.63584	0.0278718	0.163116	-5.00198
hsa-miR-151-3p	-0.100645	6.02707	-2.13695	0.0623699	0.251443	-5.80053
hsa-miR-151-5p	-0.146255	6.66113	-2.78277	0.021996	0.144969	-4.76198
hsa-miR-152	0.155993	4.71204	2.82029	0.020709	0.140622	-4.70055
hsa-miR-153	-0.129936	4.38829	-3.08251	0.013625	0.109166	-4.27089
hsa-miR-1537	0.0530937	4.28624	1.31762	0.221282	0.469265	-6.96196
hsa-miR-1538	0.0273998	4.29138	0.588589	0.571104	0.7743	-7.65386
hsa-miR-1539	0.0421149	4.37724	0.915371	0.384674	0.625386	-7.39769
hsa-miR-154	0.049508	4.3269	1.26574	0.238459	0.491245	-7.02453
hsa-miR-154*	0.0366815	4.32018	0.708709	0.49706	0.723265	-7.57116
hsa-miR-155	0.117772	4.61424	2.79045	0.0217261	0.144608	-4.74941
hsa-miR-155*	0.173478	4.30824	4.13288	0.00274313	0.0481361	-2.58923
hsa-miR-15a	-0.0511773	7.30196	-0.845664	0.420396	0.657618	-7.46041
hsa-miR-15a*	0.10539	4.32494	2.12107	0.0639803	0.254545	-5.82525
hsa-miR-15b	-0.395703	8.17144	-9.17101	9.24e-06	0.00118361	3.56583
hsa-miR-15b*	-0.175697	4.30741	-2.29504	0.0483477	0.220562	-5.55153
hsa-miR-16	-0.10736	10.3598	-1.11033	0.296609	0.550253	-7.20125
hsa-miR-16-1*	0.118016	4.27588	2.84151	0.0200157	0.13836	-4.66581
hsa-miR-16-2*	0.154699	4.33306	2.73906	0.0235989	0.15073	-4.83349
hsa-miR-17	-0.160432	6.22009	-4.15669	0.00264971	0.047186	-2.5524
hsa-miR-17*	-0.0453871	4.81719	-1.09381	0.303406	0.555762	-7.21903
hsa-miR-181a	-0.131771	4.54109	-2.70104	0.0250892	0.155534	-4.89561
hsa-miR-181a-2*	-0.20842	4.26833	-2.85144	0.0196992	0.137231	-4.64953
hsa-miR-181a*	0.0514256	4.32418	1.45742	0.18014	0.430538	-6.78526
hsa-miR-181b	0.0719843	4.45863	1.78726	0.108698	0.327678	-6.32889
hsa-miR-181c	-0.110763	4.30927	-2.68836	0.0256073	0.156852	-4.91632
hsa-miR-181c*	-0.118485	4.42172	-2.8674	0.0192017	0.134813	-4.62339
hsa-miR-181d	0.114435	4.39218	2.31024	0.0471751	0.217588	-5.52733
hsa-miR-182	-0.134678	4.22841	-2.62983	0.0281437	0.163677	-5.01178
hsa-miR-182*	-0.22802	4.55004	-4.12062	0.00279258	0.0481361	-2.60821
hsa-miR-1825	-0.0527249	4.5007	-1.06053	0.317467	0.565392	-7.25424
hsa-miR-1826	0.0539999	4.46239	1.31018	0.223678	0.472675	-6.97103
hsa-miR-1827	-0.110777	4.31512	-2.37174	0.0427133	0.207321	-5.42911
hsa-miR-183	-0.321158	7.49812	-4.54355	0.0015267	0.0357202	-1.96446
hsa-miR-183*	-0.197875	4.80827	-4.28849	0.00219059	0.0430425	-2.34989
hsa-miR-184	-0.0880993	4.34783	-1.59467	0.146423	0.384878	-6.60146
hsa-miR-185	-0.182501	4.70946	-4.0245	0.00321487	0.0519519	-2.75768
hsa-miR-185*	-0.100027	4.26169	-1.99126	0.0787453	0.279717	-6.02502
hsa-miR-186	-0.137376	4.55069	-3.14201	0.0123999	0.104282	-4.17352
hsa-miR-186*	0.41642	4.42304	4.1279	0.00276311	0.0481361	-2.59694
hsa-miR-187	-0.0761	4.24691	-1.60463	0.144212	0.381952	-6.58776
hsa-miR-187*	0.140608	4.77017	3.58436	0.00622724	0.0724893	-3.45542
hsa-miR-188-3p	-0.148644	4.35124	-3.01245	0.0152295	0.115684	-4.38564
hsa-miR-188-5p	0.0514792	5.20963	0.562674	0.587864	0.786426	-7.66986
hsa-miR-18a	-0.113383	5.82334	-1.79755	0.106961	0.325729	-6.31391
hsa-miR-18a*	-0.0961918	4.27674	-2.29962	0.0479915	0.220174	-5.54424
hsa-miR-18b	-0.120142	5.22486	-2.17369	0.0587929	0.243222	-5.74311
hsa-miR-18b*	-0.177085	4.3185	-3.50193	0.00706796	0.0745323	-3.5882
hsa-miR-190	0.111509	4.36367	2.77737	0.022188	0.145408	-4.77083
hsa-miR-1908	-0.111867	4.27094	-2.91028	0.0179273	0.12753	-4.55311
hsa-miR-1909	0.0365228	4.28895	1.00556	0.341784	0.588133	-7.31054
hsa-miR-1909*	0.138948	4.31984	2.1243	0.063649	0.254545	-5.82022
hsa-miR-190b	0.0769961	4.35756	1.34404	0.212941	0.462518	-6.92944
hsa-miR-191	-0.0841471	4.25541	-2.02421	0.0747139	0.273844	-5.97473
hsa-miR-191*	0.171436	4.62268	4.12338	0.00278134	0.0481361	-2.60392
hsa-miR-1910	0.198446	4.31135	3.25699	0.0103459	0.0933563	-3.98573
hsa-miR-1911	0.0848157	4.28671	2.04356	0.0724389	0.270164	-5.94505
hsa-miR-1911*	0.0797547	4.2922	1.92321	0.0877398	0.293619	-6.12788
hsa-miR-1912	0.0669515	4.30088	1.83738	0.100477	0.314078	-6.25553
hsa-miR-1913	0.0415517	4.3258	1.11322	0.295433	0.550151	-7.19812
hsa-miR-1914	0.0418123	4.29516	0.923225	0.38079	0.622877	-7.39037
hsa-miR-1914*	-0.0915128	5.67525	-0.448963	0.664436	0.827544	-7.73204
hsa-miR-1915	0.453421	8.68252	6.95007	7.91e-05	0.00574663	1.23224
hsa-miR-1915*	0.0179586	4.36696	0.374194	0.717219	0.858172	-7.76563
hsa-miR-192	-0.117405	5.18956	-2.9964	0.0156239	0.117027	-4.41194
hsa-miR-192*	-0.0805882	4.37188	-1.64495	0.135565	0.370702	-6.53184
hsa-miR-193a-3p	0.0890508	4.77483	1.79533	0.107334	0.326126	-6.31715
hsa-miR-193a-5p	0.0513932	4.4059	1.38603	0.200239	0.448702	-6.87691
hsa-miR-193b	-0.257165	6.19993	-3.52219	0.00685075	0.073699	-3.5555
hsa-miR-193b*	0.0947521	4.64468	1.9986	0.0778289	0.2783	-6.01383
hsa-miR-194	0.0181935	4.34772	0.416104	0.687413	0.843273	-7.74752
hsa-miR-194*	0.57637	4.71312	9.37036	7.79e-06	0.00104701	3.75213
hsa-miR-195	-0.0269884	4.37306	-0.543488	0.600444	0.791856	-7.68127
hsa-miR-195*	-0.143948	4.29938	-3.87185	0.00403143	0.0582823	-2.99732
hsa-miR-196a	-0.111364	4.74735	-2.47145	0.0363533	0.190183	-5.26873
hsa-miR-196a*	-0.0674953	4.33565	-1.4167	0.191377	0.440217	-6.83788
hsa-miR-196b	0.0281525	4.34229	0.739419	0.479133	0.708684	-7.54781
hsa-miR-197	-0.311281	6.4727	-7.42338	4.81e-05	0.0039429	1.77325
hsa-miR-198	-0.0901098	4.29136	-1.69505	0.125478	0.354051	-6.46134
hsa-miR-199a-3p	0.0421716	4.32139	1.11465	0.294851	0.549829	-7.19656
hsa-miR-199a-5p	-0.110566	4.2919	-2.5318	0.0329733	0.177453	-5.17109
hsa-miR-199b-5p	-0.0341707	4.36137	-0.806325	0.441544	0.676402	-7.49395
hsa-miR-19a	-0.0697794	5.83286	-1.08361	0.307664	0.558456	-7.22991
hsa-miR-19a*	0.128407	4.2502	2.34835	0.0443585	0.209263	-5.46653
hsa-miR-19b	-0.0155515	5.90082	-0.202231	0.844387	0.929528	-7.82024
hsa-miR-19b-1*	0.15631	4.32103	2.51011	0.03415	0.180767	-5.20622
hsa-miR-19b-2*	0.136193	4.33607	2.7418	0.0234948	0.150424	-4.829
hsa-miR-200a	-0.0144245	4.30231	-0.300146	0.771115	0.889927	-7.79307
hsa-miR-200a*	-0.106858	4.36169	-2.11253	0.0648635	0.25605	-5.83852
hsa-miR-200b	-0.144223	4.29981	-3.14323	0.012376	0.104282	-4.17152
hsa-miR-200b*	-0.0808955	4.31459	-1.75954	0.11351	0.334582	-6.36906
hsa-miR-200c	1.05934	5.00512	19.2775	1.94e-08	5.81e-06	10.172
hsa-miR-200c*	0.138094	4.3237	3.10123	0.0132266	0.107127	-4.24024
hsa-miR-202	-0.0666008	4.45704	-1.5439	0.158177	0.398859	-6.67056
hsa-miR-202*	-0.0308318	4.33055	-0.745501	0.475633	0.706227	-7.54308
hsa-miR-203	-0.0701467	4.34003	-1.86899	0.0955959	0.307306	-6.20881
hsa-miR-204	-0.10753	4.35337	-2.57548	0.030726	0.17106	-5.10021
hsa-miR-205	-0.112758	4.52031	-2.78672	0.0218569	0.144761	-4.75552
hsa-miR-206	0.0437696	4.50449	0.996575	0.345888	0.591078	-7.31951
hsa-miR-208a	-0.0224758	4.3234	-0.497346	0.631275	0.807948	-7.70719
hsa-miR-208b	-0.0494641	4.2824	-1.25457	0.242301	0.49397	-7.03778
hsa-miR-20a	0.115962	7.3911	1.87638	0.0944874	0.304283	-6.19784
hsa-miR-20a*	-0.0977431	4.34162	-1.96894	0.0815938	0.285488	-6.05891
hsa-miR-20b	-0.0596434	4.63387	-1.22652	0.25217	0.504904	-7.07068
hsa-miR-20b*	-0.108359	4.2303	-2.36496	0.0431838	0.207799	-5.43997
hsa-miR-21	-0.298486	9.72477	-8.00497	2.69e-05	0.00278345	2.40377
hsa-miR-21*	0.174266	6.84172	2.99868	0.0155674	0.117027	-4.40822
hsa-miR-210	-0.393615	6.40401	-6.35667	0.000152998	0.00904839	0.515847
hsa-miR-211	0.109518	4.3391	2.52194	0.0335034	0.178751	-5.18707
hsa-miR-212	0.0505696	4.4489	1.1766	0.270553	0.524904	-7.12794
hsa-miR-214	-0.105326	4.34484	-2.67957	0.025973	0.15833	-4.93067
hsa-miR-214*	-0.124098	4.30336	-2.65747	0.0269158	0.16077	-4.96673
hsa-miR-215	0.108111	4.38009	2.92063	0.017633	0.125769	-4.53615
hsa-miR-216a	0.0932617	4.28249	1.92525	0.0874563	0.293609	-6.12482
hsa-miR-216b	-0.115099	4.26402	-2.32982	0.0457067	0.213377	-5.49613
hsa-miR-217	0.133474	4.31322	2.58444	0.0302841	0.170008	-5.08564
hsa-miR-218	0.0549812	4.29913	1.33728	0.215051	0.46362	-6.93781
hsa-miR-218-1*	0.0736028	4.24888	1.80808	0.105209	0.322716	-6.29853
hsa-miR-218-2*	0.176563	4.31403	3.70959	0.00514587	0.0672431	-3.25486
hsa-miR-219-1-3p	0.106838	4.25954	2.28819	0.0488854	0.221674	-5.56241
hsa-miR-219-2-3p	-0.0659853	4.30316	-1.76409	0.112707	0.333799	-6.36249
hsa-miR-219-5p	0.0860912	4.38317	1.65513	0.133458	0.367698	-6.51761
hsa-miR-22	-0.0696001	6.03644	-1.2972	0.227914	0.477306	-6.98679
hsa-miR-22*	0.149702	4.43238	3.64839	0.00564716	0.070111	-3.35269
hsa-miR-220a	-0.169049	4.32795	-4.18524	0.00254217	0.0459903	-2.50834
hsa-miR-220b	-0.115124	4.28195	-2.02029	0.0751826	0.274309	-5.98072
hsa-miR-220c	-0.124539	4.34473	-3.17328	0.0118025	0.101795	-4.1224
hsa-miR-221	-0.223141	4.96563	-2.795	0.0215677	0.144018	-4.74196
hsa-miR-221*	0.0686486	4.40582	1.345	0.212643	0.462245	-6.92825
hsa-miR-222	-0.0414618	4.42579	-1.08344	0.307735	0.558456	-7.23009
hsa-miR-222*	0.083864	4.31154	1.32412	0.219204	0.466329	-6.95399
hsa-miR-223	-0.0224495	4.37557	-0.523343	0.613806	0.798301	-7.69285
hsa-miR-223*	0.168445	4.35251	3.69546	0.00525728	0.0679655	-3.27742
hsa-miR-224	-0.0484051	4.32453	-1.06177	0.316932	0.565179	-7.25294
hsa-miR-23a	-0.294643	8.1671	-4.39515	0.00188144	0.0394046	-2.18767
hsa-miR-23a*	-0.178145	4.53165	-3.99948	0.00333565	0.0530467	-2.79678
hsa-miR-23b	-0.225866	4.98858	-4.97287	0.000849418	0.0271915	-1.3358
hsa-miR-23b*	0.0928344	4.32245	2.44412	0.0379959	0.194741	-5.31281
hsa-miR-24	-0.70749	9.86474	-7.59515	4.04e-05	0.00361711	1.96328
hsa-miR-24-1*	0.0805303	4.4354	2.06345	0.0701708	0.26651	-5.91445
hsa-miR-24-2*	-0.255063	4.25436	-5.97938	0.000238041	0.0112297	0.0369134
hsa-miR-25	-0.126732	5.72705	-1.99437	0.0783554	0.279117	-6.02028
hsa-miR-25*	-0.313458	4.28258	-7.90568	2.96e-05	0.00294638	2.29868
hsa-miR-26a	-0.0932284	5.331	-1.89841	0.0912537	0.298881	-6.16501
hsa-miR-26a-1*	-0.0651699	4.37526	-0.972037	0.357288	0.602341	-7.3437
hsa-miR-26a-2*	0.0703929	4.31518	1.86435	0.0962983	0.307903	-6.21569
hsa-miR-26b	-0.158522	4.79762	-3.54966	0.00656751	0.0730616	-3.51124
hsa-miR-26b*	-0.109407	4.35205	-2.82312	0.0206152	0.14034	-4.69592
hsa-miR-27a	-0.334799	9.58723	-5.94605	0.000247739	0.0114857	-0.00631321
hsa-miR-27a*	-0.160355	4.29158	-3.64553	0.00567182	0.070111	-3.35727
hsa-miR-27b	-0.129968	5.43493	-2.33433	0.0453747	0.212196	-5.48893
hsa-miR-27b*	-0.113474	4.29546	-2.72888	0.0239887	0.152136	-4.85013
hsa-miR-28-3p	-0.0639481	4.29911	-1.49773	0.169588	0.416459	-6.73228
hsa-miR-28-5p	-0.104971	4.86067	-2.56691	0.0311541	0.172019	-5.11412
hsa-miR-296-3p	-0.112733	4.24742	-2.00395	0.0771688	0.277357	-6.00569
hsa-miR-296-5p	0.0474833	4.46497	0.990013	0.348909	0.592904	-7.32603
hsa-miR-297	-0.100829	4.28774	-2.2492	0.0520594	0.226884	-5.62422
hsa-miR-298	0.182407	4.27467	3.56309	0.00643359	0.0729954	-3.48963
hsa-miR-299-3p	-0.0189798	4.33249	-0.508464	0.623773	0.803317	-7.70114
hsa-miR-299-5p	0.0860453	4.3148	1.92044	0.0881262	0.293619	-6.13204
hsa-miR-29a	-0.131003	8.0477	-3.20549	0.0112183	0.0989046	-4.06977
hsa-miR-29a*	0.0597051	4.36671	1.65554	0.133374	0.367698	-6.51703
hsa-miR-29b	-0.0931483	8.46255	-1.72066	0.120593	0.345709	-6.4249
hsa-miR-29b-1*	-0.0979799	4.48399	-2.44253	0.0380936	0.194741	-5.31537
hsa-miR-29b-2*	-0.123923	4.28832	-2.59583	0.0297322	0.16867	-5.06712
hsa-miR-29c	-0.109351	6.68182	-1.71398	0.121851	0.347222	-6.43443
hsa-miR-29c*	0.0232559	4.32347	0.594106	0.567571	0.773068	-7.65037
hsa-miR-300	-0.207257	4.24743	-5.00006	0.000819187	0.0265397	-1.29684
hsa-miR-301a	-0.0720702	4.6813	-1.74242	0.11658	0.338653	-6.39372
hsa-miR-301b	0.123208	4.3223	3.01761	0.0151049	0.115063	-4.37719
hsa-miR-302a	-0.0786095	4.32886	-1.79059	0.108133	0.327678	-6.32404
hsa-miR-302a*	0.155406	4.33266	2.99149	0.0157466	0.117185	-4.41999
hsa-miR-302b	-0.0958508	4.32188	-2.45338	0.037431	0.194314	-5.29788
hsa-miR-302b*	0.13628	4.3448	2.82507	0.0205508	0.14034	-4.69273
hsa-miR-302c	-0.0870842	4.30174	-2.25471	0.0515989	0.225976	-5.6155
hsa-miR-302c*	0.0753775	4.28903	2.10944	0.0651851	0.256217	-5.84331
hsa-miR-302d	-0.103426	4.29628	-2.48242	0.0357137	0.187934	-5.251
hsa-miR-302d*	0.0726384	4.30016	1.43315	0.186766	0.437603	-6.81674
hsa-miR-302e	0.0253566	4.27072	0.607299	0.559172	0.768718	-7.6419
hsa-miR-302f	-0.198486	4.30139	-3.02248	0.0149884	0.114499	-4.36921
hsa-miR-30a	0.0558265	8.65643	1.16679	0.274291	0.528052	-7.13899
hsa-miR-30a*	-0.146379	5.4846	-3.36743	0.0087054	0.0852946	-3.80599
hsa-miR-30b	-0.157955	5.738	-2.05358	0.0712882	0.268698	-5.92966
hsa-miR-30b*	0.00243505	4.50468	0.0652899	0.949419	0.983053	-7.84058
hsa-miR-30c	-0.0900269	4.85021	-2.29025	0.048723	0.221311	-5.55914
hsa-miR-30c-1*	0.116077	4.31934	2.60299	0.0293901	0.167792	-5.05547
hsa-miR-30c-2*	-0.0234435	5.00518	-0.641662	0.537634	0.751402	-7.61903
hsa-miR-30d	-0.0699012	5.25859	-1.35112	0.210754	0.460611	-6.92066
hsa-miR-30d*	0.106034	4.36829	2.30458	0.0476083	0.218835	-5.53634
hsa-miR-30e	-0.101479	4.73393	-1.80695	0.105396	0.32279	-6.30018
hsa-miR-30e*	-0.0846871	4.77972	-1.83209	0.101316	0.315687	-6.26331
hsa-miR-31	-0.0622772	4.31131	-1.60223	0.144743	0.382707	-6.59107
hsa-miR-31*	-0.0747883	4.30964	-1.9494	0.0841677	0.289421	-6.08846
hsa-miR-32	-0.0938531	4.59334	-1.54644	0.15757	0.398008	-6.66714
hsa-miR-32*	0.0891141	4.40238	1.60794	0.143483	0.381022	-6.58319
hsa-miR-320a	-0.0282793	7.21223	-0.52841	0.61043	0.797457	-7.68998
hsa-miR-320b	-0.144617	6.16115	-3.35451	0.00888245	0.0856955	-3.82699
hsa-miR-320c	-0.349659	8.0213	-7.56241	4.17e-05	0.0036182	1.92731
hsa-miR-320d	-0.183093	6.15831	-4.31194	0.00211823	0.0428265	-2.3141
hsa-miR-323-3p	-0.0534117	4.30483	-0.976919	0.354998	0.60037	-7.33892
hsa-miR-323-5p	-0.141449	4.32146	-3.07273	0.013838	0.109765	-4.2869
hsa-miR-324-3p	-0.395065	7.16309	-8.69948	1.4e-05	0.00171625	3.11129
hsa-miR-324-5p	-0.511288	6.55102	-13.3912	4.2e-07	7.06e-05	6.91089
hsa-miR-325	-0.0735155	4.34326	-1.78848	0.108491	0.327678	-6.32712
hsa-miR-326	-0.201593	4.51917	-4.114	0.00281969	0.0482938	-2.61847
hsa-miR-328	0.0325099	4.46109	0.690731	0.507748	0.730125	-7.58441
hsa-miR-329	-0.0526405	4.29672	-1.39971	0.196244	0.442846	-6.85957
hsa-miR-330-3p	-0.178047	4.78785	-4.68172	0.00126047	0.0332294	-1.75934
hsa-miR-330-5p	0.11922	4.2974	2.61671	0.0287459	0.16552	-5.03314
hsa-miR-331-3p	-0.453256	7.37671	-7.28378	5.55e-05	0.00439135	1.61637
hsa-miR-331-5p	-0.0716274	4.31015	-1.37691	0.202942	0.451105	-6.88841
hsa-miR-335	-0.0723865	4.28404	-1.81032	0.104841	0.32256	-6.29525
hsa-miR-335*	0.0760334	4.35609	1.47433	0.175645	0.424677	-6.76314
hsa-miR-337-3p	0.407497	4.42348	2.69921	0.0251635	0.155534	-4.89861
hsa-miR-337-5p	-0.0774581	4.29331	-1.71937	0.120835	0.345979	-6.42674
hsa-miR-338-3p	-0.113372	4.40891	-2.85974	0.0194388	0.136122	-4.63593
hsa-miR-338-5p	0.254485	4.41676	4.73046	0.00117885	0.0323463	-1.6876
hsa-miR-339-3p	0.0661716	4.49477	1.64789	0.134953	0.369916	-6.52773
hsa-miR-339-5p	0.136359	4.2734	3.04037	0.0145679	0.112986	-4.3399
hsa-miR-33a	-0.196064	4.57831	-5.21098	0.000620712	0.0216766	-0.998268
hsa-miR-33a*	-0.0957931	4.28808	-1.92589	0.0873675	0.293609	-6.12386
hsa-miR-33b	-0.133366	4.33607	-2.45892	0.037097	0.193697	-5.28894
hsa-miR-33b*	0.169857	4.50397	3.23092	0.0107783	0.0959697	-4.02826
hsa-miR-340	-0.143468	4.46851	-2.74515	0.0233687	0.150331	-4.82354
hsa-miR-340*	0.254499	4.78477	5.64961	0.000355639	0.0147125	-0.397338
hsa-miR-342-3p	1.13139	4.79968	23.7624	3.25e-09	1.25e-06	12.012
hsa-miR-342-5p	-0.0785604	4.30742	-1.96142	0.082575	0.286283	-6.07029
hsa-miR-345	-0.0973584	4.36991	-1.75417	0.114465	0.336031	-6.37681
hsa-miR-346	0.0492747	4.31857	1.12381	0.291152	0.545961	-7.18659
hsa-miR-34a	-0.195791	4.76387	-3.63355	0.00577634	0.070111	-3.37646
hsa-miR-34a*	0.0899911	4.32054	2.12152	0.0639343	0.254545	-5.82455
hsa-miR-34b	0.0698902	4.33346	1.35076	0.210864	0.460611	-6.9211
hsa-miR-34b*	-0.13893	4.69465	-3.67943	0.00538677	0.0686494	-3.30303
hsa-miR-34c-3p	-0.113971	4.32078	-2.09028	0.0672191	0.260023	-5.87301
hsa-miR-34c-5p	-0.099187	4.51218	-1.92114	0.088028	0.293619	-6.13099
hsa-miR-361-3p	-0.0780446	4.48781	-1.33762	0.214943	0.46362	-6.93738
hsa-miR-361-5p	-0.228116	6.24731	-3.57443	0.00632268	0.0726568	-3.47138
hsa-miR-362-3p	-0.0719616	4.41941	-1.693	0.125877	0.354805	-6.46425
hsa-miR-362-5p	-0.132932	4.56994	-3.39174	0.00838236	0.0832636	-3.76653
hsa-miR-363	-0.0709311	4.34725	-1.49237	0.170958	0.419059	-6.73937
hsa-miR-363*	0.200264	4.29954	4.86913	0.000976302	0.0294975	-1.48535
hsa-miR-365	-0.174759	5.17265	-3.63784	0.00573868	0.070111	-3.36959
hsa-miR-367	-0.0224459	4.37877	-0.54943	0.596533	0.789665	-7.67777
hsa-miR-367*	0.141141	4.32304	3.41672	0.00806336	0.0824425	-3.72602
hsa-miR-369-3p	0.157927	4.33436	4.10626	0.00285172	0.0485333	-2.63047
hsa-miR-369-5p	-0.117744	4.32296	-2.98231	0.0159789	0.117397	-4.43504
hsa-miR-370	0.28568	4.57258	4.75176	0.00114501	0.0320721	-1.65637
hsa-miR-371-3p	0.0835124	4.37302	2.11178	0.0649409	0.25605	-5.83968
hsa-miR-371-5p	-0.148022	5.15738	-3.35157	0.00892329	0.0856955	-3.83177
hsa-miR-372	0.109986	4.31262	2.59239	0.0298979	0.169123	-5.07272
hsa-miR-373	0.0327898	4.33382	0.932355	0.37631	0.619231	-7.38179
hsa-miR-373*	0.0945697	4.34009	2.40805	0.0402776	0.200882	-5.37085
hsa-miR-374a	-0.21479	5.30505	-4.69922	0.00123049	0.0332294	-1.73355
hsa-miR-374a*	0.0662969	4.34733	1.58557	0.148471	0.387045	-6.61394
hsa-miR-374b	-0.190491	5.2791	-4.38162	0.00191792	0.0396715	-2.20816
hsa-miR-374b*	0.0732901	4.34441	1.44427	0.183704	0.433697	-6.80236
hsa-miR-375	0.113583	4.28067	2.59134	0.0299487	0.169123	-5.07443
hsa-miR-376a	0.0489161	4.3096	0.944956	0.370191	0.613336	-7.36983
hsa-miR-376a*	-0.086317	4.31601	-2.27601	0.049856	0.22284	-5.58175
hsa-miR-376b	0.0362497	4.31008	0.913057	0.385824	0.626876	-7.39984
hsa-miR-376c	-0.133363	4.30309	-3.61389	0.00595229	0.0706636	-3.408
hsa-miR-377	-0.0247475	4.35507	-0.583524	0.574359	0.775605	-7.65704
hsa-miR-377*	0.107385	4.30556	1.45723	0.180191	0.430538	-6.78551
hsa-miR-378	-0.122379	4.6272	-3.15794	0.0120917	0.103514	-4.14746
hsa-miR-378*	-0.0626436	4.53211	-1.70015	0.124491	0.352004	-6.4541
hsa-miR-379	0.101382	4.2734	2.22382	0.0542331	0.230748	-5.6643
hsa-miR-379*	0.106827	4.30573	2.8331	0.0202876	0.139523	-4.67958
hsa-miR-380	-0.0277163	4.34036	-0.57376	0.580661	0.782264	-7.66309
hsa-miR-380*	-0.110576	4.29542	-2.17172	0.0589789	0.243501	-5.74619
hsa-miR-381	-0.0580292	4.27926	-1.56369	0.153497	0.393099	-6.64377
hsa-miR-382	0.0717417	4.34649	1.6254	0.139697	0.376022	-6.55905
hsa-miR-383	-0.136225	4.33686	-2.71737	0.0244376	0.154279	-4.86894
hsa-miR-384	-0.0249718	4.29306	-0.517641	0.617616	0.800373	-7.69605
hsa-miR-409-3p	-0.0434766	4.2775	-1.15057	0.280561	0.534298	-7.15711
hsa-miR-409-5p	-0.102549	4.33545	-2.60643	0.0292271	0.167573	-5.04987
hsa-miR-410	0.0762122	4.31496	1.29435	0.228855	0.47853	-6.99024
hsa-miR-411	0.02499	4.31372	0.527633	0.610948	0.797457	-7.69042
hsa-miR-411*	0.134248	4.33089	3.58003	0.00626869	0.072542	-3.46238
hsa-miR-412	-0.0719761	4.23677	-1.47929	0.174345	0.423882	-6.75662
hsa-miR-421	-0.240278	4.6293	-5.9028	0.000260968	0.0116957	-0.062617
hsa-miR-422a	-0.106	4.46778	-2.0442	0.0723654	0.270164	-5.94408
hsa-miR-423-3p	-0.0531994	4.56145	-1.12921	0.28899	0.543422	-7.18068
hsa-miR-423-5p	-0.187398	5.05258	-4.56343	0.00148493	0.0357202	-1.93479
hsa-miR-424	0.0457017	4.40859	1.08514	0.307019	0.558456	-7.22828
hsa-miR-424*	0.109247	4.47696	2.09033	0.067214	0.260023	-5.87294
hsa-miR-425	0.0522185	6.46109	0.599161	0.564344	0.77149	-7.64714
hsa-miR-425*	-0.0348847	4.7899	-0.393654	0.703312	0.849349	-7.75746
hsa-miR-429	0.1323	4.32193	2.22772	0.0538934	0.230031	-5.65815
hsa-miR-431	-0.069264	4.30552	-1.60091	0.145035	0.383103	-6.59289
hsa-miR-431*	0.0990117	4.57301	2.69729	0.0252413	0.155534	-4.90174
hsa-miR-432	0.0422819	4.37904	0.955472	0.36514	0.610223	-7.35975
hsa-miR-432*	0.064472	4.30584	1.3424	0.213451	0.463108	-6.93147
hsa-miR-433	-0.069108	4.27172	-1.66301	0.131846	0.365499	-6.50655
hsa-miR-448	-0.15796	4.26871	-3.33299	0.0091856	0.0875889	-3.86196
hsa-miR-449a	-0.0428182	4.33429	-1.02327	0.333797	0.581334	-7.29265
hsa-miR-449b	-0.0892495	4.34741	-2.07656	0.0687132	0.262831	-5.89423
hsa-miR-450a	-0.0240053	4.33545	-0.407465	0.693513	0.845928	-7.75141
hsa-miR-450b-3p	0.15412	4.31526	3.8308	0.00428679	0.0613147	-3.06222
hsa-miR-450b-5p	-0.141724	4.34388	-3.53529	0.00671414	0.0733915	-3.53439
hsa-miR-451	0.157014	4.32115	2.97348	0.0162056	0.118094	-4.44952
hsa-miR-452	-0.124087	4.29827	-2.89439	0.0183889	0.130126	-4.57915
hsa-miR-452*	0.249841	4.2532	5.4805	0.000439433	0.0166427	-0.625836
hsa-miR-453	0.219279	4.34543	5.0992	0.000718464	0.0244551	-1.15573
hsa-miR-454	-0.0550066	4.34794	-0.980987	0.353097	0.59767	-7.33493
hsa-miR-454*	-0.0860432	4.31586	-2.23119	0.053593	0.229112	-5.65267
hsa-miR-455-3p	-0.146469	4.45728	-3.05468	0.0142402	0.11169	-4.31645
hsa-miR-455-5p	0.0292804	4.37475	0.697444	0.503741	0.729434	-7.5795
hsa-miR-483-3p	0.0481421	4.37725	1.30251	0.226173	0.475122	-6.98035
hsa-miR-483-5p	-0.0371822	5.58727	-0.100108	0.922528	0.970911	-7.83738
hsa-miR-484	-0.112049	4.40862	-2.23373	0.0533738	0.228538	-5.64866
hsa-miR-485-3p	-0.0130666	4.28204	-0.281182	0.785146	0.896756	-7.79914
hsa-miR-485-5p	-0.253241	4.32323	-3.94554	0.00361274	0.0552459	-2.88132
hsa-miR-486-3p	-0.194541	5.55133	-1.67641	0.129149	0.362184	-6.48771
hsa-miR-486-5p	-0.180424	4.87239	-4.75454	0.00114066	0.0320721	-1.6523
hsa-miR-487a	-0.0753817	4.29913	-1.98274	0.079821	0.282048	-6.03797
hsa-miR-487b	-0.0582136	4.43266	-1.27242	0.236187	0.489674	-7.01657
hsa-miR-488	-0.0977626	4.3201	-2.66511	0.0265858	0.159936	-4.95426
hsa-miR-488*	-0.0340986	4.31962	-0.867215	0.409112	0.650564	-7.44147
hsa-miR-489	0.0369688	4.45046	0.948852	0.368314	0.611232	-7.36611
hsa-miR-490-3p	-0.0648322	4.3118	-1.56806	0.152483	0.392749	-6.63784
hsa-miR-490-5p	-0.103278	4.31945	-2.10864	0.0652691	0.256217	-5.84456
hsa-miR-491-3p	-0.129868	4.32101	-3.09626	0.0133312	0.10765	-4.24838
hsa-miR-491-5p	-0.138043	4.30445	-3.11121	0.0130191	0.106233	-4.22391
hsa-miR-492	-0.127934	4.31538	-2.63129	0.0280771	0.163677	-5.00939
hsa-miR-493	0.113866	4.31519	2.81033	0.0210432	0.142174	-4.71688
hsa-miR-493*	-0.0552405	4.34639	-1.45104	0.181861	0.431767	-6.79357
hsa-miR-494	-0.313905	7.36085	-1.21268	0.257161	0.50921	-7.08672
hsa-miR-495	0.0243677	4.31833	0.655361	0.529186	0.744944	-7.6096
hsa-miR-496	0.0944298	4.29885	2.24592	0.052335	0.227349	-5.6294
hsa-miR-497	-0.0418156	4.32482	-0.829072	0.429229	0.663713	-7.47473
hsa-miR-497*	-0.110857	4.30001	-2.57875	0.0305638	0.17051	-5.09488
hsa-miR-498	0.0605694	4.53116	1.14309	0.28349	0.537971	-7.1654
hsa-miR-499-3p	-0.114689	4.30889	-2.35681	0.0437562	0.208321	-5.45301
hsa-miR-499-5p	0.0651575	4.30797	1.38037	0.201914	0.450578	-6.88406
hsa-miR-500	-0.0915264	4.70792	-2.01169	0.076221	0.276224	-5.99386
hsa-miR-500*	-0.185843	5.03618	-3.76576	0.00472708	0.0635997	-3.1654
hsa-miR-501-3p	-0.244634	4.84258	-4.54311	0.00152764	0.0357202	-1.96512
hsa-miR-501-5p	-0.148299	4.7045	-1.38281	0.201191	0.449711	-6.88098
hsa-miR-502-3p	-0.034447	4.93266	-0.854081	0.415964	0.655936	-7.45306
hsa-miR-502-5p	0.0849614	4.38572	2.16658	0.0594685	0.244139	-5.75423
hsa-miR-503	-0.100212	4.76653	-2.35913	0.0435923	0.208321	-5.44929
hsa-miR-504	-0.281512	4.30377	-3.88765	0.0039375	0.0579488	-2.9724
hsa-miR-505	-0.0415077	4.36561	-1.00203	0.343391	0.588269	-7.31407
hsa-miR-505*	-0.162813	4.76039	-3.11033	0.0130372	0.106233	-4.22534
hsa-miR-506	-0.0154026	4.30321	-0.394154	0.702957	0.849349	-7.75724
hsa-miR-507	0.0745578	4.30678	1.61281	0.142419	0.378953	-6.57648
hsa-miR-508-3p	-0.0793752	4.31374	-1.96719	0.0818207	0.285488	-6.06155
hsa-miR-508-5p	0.0724559	4.29493	1.4738	0.175785	0.424677	-6.76384
hsa-miR-509-3-5p	0.0793189	4.28468	1.56516	0.153156	0.393099	-6.64178
hsa-miR-509-3p	-0.163461	4.34267	-3.93801	0.0036533	0.0555012	-2.89313
hsa-miR-509-5p	0.0218729	4.3387	0.560053	0.589575	0.786426	-7.67144
hsa-miR-510	-0.178824	4.28226	-3.34293	0.00904435	0.0865489	-3.84581
hsa-miR-511	-0.18105	4.32569	-3.56015	0.00646259	0.0730164	-3.49435
hsa-miR-512-3p	0.060865	4.38947	1.47248	0.176132	0.42477	-6.76557
hsa-miR-512-5p	0.0744348	4.3049	1.85898	0.0971166	0.310015	-6.22364
hsa-miR-513a-3p	0.152161	4.32424	2.69866	0.0251859	0.155534	-4.89951
hsa-miR-513a-5p	0.0309588	5.08994	0.743582	0.476735	0.70745	-7.54458
hsa-miR-513b	0.0840858	4.60354	1.48367	0.173205	0.421874	-6.75086
hsa-miR-513c	0.0605395	4.78065	1.2575	0.241289	0.49312	-7.03431
hsa-miR-514	-0.00894121	4.33023	-0.165949	0.871991	0.943622	-7.82765
hsa-miR-515-3p	0.030384	4.29709	0.781298	0.455367	0.690238	-7.51457
hsa-miR-515-5p	0.140561	4.35299	3.68258	0.00536103	0.0686467	-3.29799
hsa-miR-516a-3p	0.0610874	4.32178	1.52211	0.163474	0.407396	-6.69982
hsa-miR-516a-5p	0.0511462	4.31305	1.40741	0.194026	0.442525	-6.84977
hsa-miR-516b	0.0198938	4.32037	0.516971	0.618064	0.800566	-7.69643
hsa-miR-517*	0.0624174	4.31477	1.41121	0.192939	0.441733	-6.84492
hsa-miR-517a	0.0255899	4.30874	0.453631	0.661201	0.825375	-7.72974
hsa-miR-517b	-0.0720508	4.31814	-1.78755	0.10865	0.327678	-6.32847
hsa-miR-517c	0.0717256	4.34346	1.61867	0.141146	0.377012	-6.56838
hsa-miR-518a-3p	0.114503	4.28774	2.99421	0.0156787	0.117111	-4.41554
hsa-miR-518a-5p	-0.070221	4.27743	-1.95461	0.0834744	0.288512	-6.08059
hsa-miR-518b	0.0701361	4.28874	1.6331	0.138057	0.373101	-6.54836
hsa-miR-518c	0.0429504	4.29806	1.01592	0.337094	0.585181	-7.3001
hsa-miR-518c*	0.127386	4.35053	3.62632	0.00584041	0.070111	-3.38806
hsa-miR-518d-3p	0.0272954	4.3747	0.518452	0.617073	0.800373	-7.6956
hsa-miR-518e	-0.00912265	4.30104	-0.211894	0.837072	0.925836	-7.81803
hsa-miR-518e*	0.697412	4.6867	18.2046	3.16e-08	8.51e-06	9.66204
hsa-miR-518f	0.0166271	4.3302	0.410965	0.691039	0.845928	-7.74984
hsa-miR-518f*	0.111999	4.28372	2.93815	0.017146	0.122621	-4.50743
hsa-miR-519b-3p	-0.167876	4.33014	-3.88818	0.0039344	0.0579488	-2.97157
hsa-miR-519c-3p	0.292807	4.7073	1.16101	0.276511	0.529962	-7.14546
hsa-miR-519d	0.041858	4.3154	1.08355	0.307686	0.558456	-7.22997
hsa-miR-519e	-0.106516	4.34774	-2.12883	0.0631881	0.253601	-5.81317
hsa-miR-519e*	-0.0175257	4.34712	-0.394257	0.702884	0.849349	-7.7572
hsa-miR-520a-3p	-0.060027	4.32324	-1.49106	0.171295	0.4195	-6.7411
hsa-miR-520a-5p	0.0687448	4.31343	1.62691	0.139375	0.375529	-6.55696
hsa-miR-520b	0.183182	4.40977	2.42954	0.0389025	0.197003	-5.3363
hsa-miR-520c-3p	0.0912278	4.38558	2.5204	0.0335867	0.178841	-5.18956
hsa-miR-520d-3p	-0.199488	4.3921	-4.74156	0.00116108	0.0321871	-1.67132
hsa-miR-520e	0.0911797	4.36702	2.41771	0.0396536	0.199679	-5.35532
hsa-miR-520f	-0.100896	4.3301	-2.15985	0.0601159	0.244927	-5.76477
hsa-miR-520g	-0.0295229	4.31483	-0.694532	0.505476	0.729928	-7.58163
hsa-miR-520h	-0.0893481	4.32045	-1.84305	0.0995845	0.313563	-6.24718
hsa-miR-521	-0.0688511	4.31567	-1.37591	0.203241	0.451105	-6.88967
hsa-miR-522	0.106625	4.30294	2.74638	0.0233224	0.150331	-4.82153
hsa-miR-523	-0.133396	4.29116	-3.12783	0.0126811	0.105207	-4.19672
hsa-miR-524-3p	-0.0611453	4.32849	-1.34988	0.211134	0.460828	-6.9222
hsa-miR-525-3p	-0.192751	4.33524	-2.7418	0.023495	0.150424	-4.82901
hsa-miR-525-5p	-0.122338	4.33369	-2.79453	0.021584	0.144018	-4.74273
hsa-miR-526b	0.0534129	4.31857	1.23333	0.249745	0.502667	-7.06274
hsa-miR-526b*	0.108009	4.29778	2.62631	0.0283041	0.163677	-5.01752
hsa-miR-532-3p	-0.195698	4.79092	-3.6178	0.00591687	0.0706636	-3.40173
hsa-miR-532-5p	-0.101965	4.65907	-2.12157	0.0639294	0.254545	-5.82448
hsa-miR-539	0.120682	4.30284	2.44586	0.0378892	0.194741	-5.31001
hsa-miR-541	-0.0638311	4.31005	-1.26453	0.238873	0.491453	-7.02597
hsa-miR-541*	0.0652292	4.28726	1.42876	0.187987	0.438031	-6.82239
hsa-miR-542-3p	0.169788	4.3758	3.6401	0.00571893	0.070111	-3.36597
hsa-miR-542-5p	-0.143893	4.58287	-3.6639	0.00551545	0.0699578	-3.32787
hsa-miR-543	-0.0314905	4.33357	-0.76159	0.466453	0.698823	-7.53041
hsa-miR-544	-0.172123	4.29716	-3.00552	0.0153985	0.116517	-4.397
hsa-miR-545	-0.0265177	4.6144	-0.663587	0.524152	0.742697	-7.60385
hsa-miR-545*	-0.164789	4.33115	-4.40967	0.0018431	0.0390243	-2.16569
hsa-miR-548a-3p	-0.123177	4.25258	-2.45336	0.037432	0.194314	-5.29791
hsa-miR-548a-5p	0.233928	4.39883	2.01521	0.0757946	0.275421	-5.98849
hsa-miR-548b-3p	0.133295	4.32443	3.12124	0.0128141	0.105373	-4.2075
hsa-miR-548b-5p	0.11381	4.34885	3.02974	0.0148163	0.113831	-4.35732
hsa-miR-548c-3p	0.0481944	4.35452	1.07114	0.312929	0.562854	-7.2431
hsa-miR-548c-5p	-0.107571	4.31227	-2.65515	0.0270165	0.16077	-4.97051
hsa-miR-548d-3p	0.17681	4.30713	4.62294	0.00136706	0.0340373	-1.84628
hsa-miR-548d-5p	0.209318	4.36751	5.7379	0.000318941	0.0136132	-0.279615
hsa-miR-548e	0.0291976	4.31172	0.755091	0.470147	0.700014	-7.53556
hsa-miR-548f	0.022512	4.35735	0.547158	0.598027	0.789863	-7.67911
hsa-miR-548g	0.0810138	4.32671	1.97914	0.08028	0.283298	-6.04344
hsa-miR-548h	-0.0635718	4.31229	-1.58674	0.148206	0.386919	-6.61234
hsa-miR-548i	-0.189197	4.31797	-3.96342	0.00351828	0.0543716	-2.85326
hsa-miR-548j	0.0881807	4.32153	1.87942	0.0940344	0.303917	-6.19331
hsa-miR-548k	0.115204	4.32046	2.65046	0.0272217	0.161583	-4.97815
hsa-miR-548l	0.0895449	4.28824	2.02391	0.0747496	0.273844	-5.97519
hsa-miR-548m	-0.028093	4.31783	-0.722651	0.488869	0.715211	-7.56067
hsa-miR-548n	-0.0766146	4.36049	-1.85717	0.0973943	0.310194	-6.22632
hsa-miR-548o	-0.0585091	4.31642	-1.42255	0.189726	0.438428	-6.83038
hsa-miR-548p	0.104128	4.34981	2.85451	0.0196025	0.136912	-4.6445
hsa-miR-549	-0.168722	4.33223	-4.21186	0.00244613	0.0456781	-2.46737
hsa-miR-550	0.104092	4.44256	1.49557	0.170138	0.417428	-6.73514
hsa-miR-550*	-0.125957	4.71467	-3.29843	0.00969543	0.0899001	-3.91821
hsa-miR-551a	0.129467	4.30511	3.24212	0.0105903	0.0949247	-4.00999
hsa-miR-551b	0.141026	4.31014	3.07606	0.0137651	0.109765	-4.28145
hsa-miR-551b*	0.091403	4.36399	1.61939	0.140989	0.377012	-6.56737
hsa-miR-552	-0.0824271	4.32042	-1.81577	0.103948	0.320545	-6.28727
hsa-miR-553	-0.108492	4.33198	-2.39219	0.0413238	0.203144	-5.39631
hsa-miR-554	0.135455	4.29759	3.25744	0.0103385	0.0933563	-3.98499
hsa-miR-555	0.135085	4.29935	3.75762	0.0047854	0.0637027	-3.17833
hsa-miR-556-3p	0.200119	4.34865	4.68759	0.00125031	0.0332294	-1.75068
hsa-miR-556-5p	-0.08315	4.37685	-1.95152	0.0838844	0.288816	-6.08525
hsa-miR-557	0.0534123	4.48815	1.19377	0.26411	0.51688	-7.10843
hsa-miR-558	0.17346	4.32123	4.53616	0.00154255	0.0357578	-1.9755
hsa-miR-559	0.139068	4.31914	3.76199	0.00475401	0.0635997	-3.1714
hsa-miR-561	-0.294764	4.31025	-5.03995	0.000776931	0.0257922	-1.23989
hsa-miR-562	-0.209329	4.27944	-4.49407	0.00163625	0.0366657	-2.03855
hsa-miR-563	0.0842679	4.3329	1.60672	0.143751	0.381208	-6.58488
hsa-miR-564	-0.0947192	4.39865	-2.02252	0.0749159	0.273957	-5.97732
hsa-miR-566	-0.0512014	4.27663	-1.35097	0.2108	0.460611	-6.92085
hsa-miR-567	0.104934	4.29047	2.07174	0.0692453	0.264285	-5.90166
hsa-miR-568	0.0875835	4.33166	1.87856	0.0941629	0.303966	-6.1946
hsa-miR-569	0.187223	4.34252	3.70888	0.00515138	0.0672431	-3.25599
hsa-miR-570	0.0932459	4.28248	2.06998	0.0694413	0.264487	-5.90439
hsa-miR-571	-0.0429026	4.44454	-0.662684	0.524703	0.742697	-7.60448
hsa-miR-572	0.184268	5.61463	3.1415	0.0124099	0.104282	-4.17436
hsa-miR-573	-0.238354	4.38363	-1.64191	0.1362	0.370702	-6.53608
hsa-miR-574-3p	-0.185482	5.01535	-4.47934	0.00167047	0.0367593	-2.06066
hsa-miR-574-5p	-0.151733	4.95092	-3.44774	0.00768493	0.080096	-3.67578
hsa-miR-575	-0.0893077	5.69043	-0.788404	0.451414	0.686567	-7.50878
hsa-miR-576-3p	-0.1249	4.28343	-3.5078	0.00700424	0.0741512	-3.57872
hsa-miR-576-5p	0.0327546	4.34539	0.763907	0.465141	0.69875	-7.52857
hsa-miR-577	-0.106298	4.34064	-2.41299	0.0399574	0.200458	-5.36291
hsa-miR-578	0.096084	4.26725	2.15783	0.0603116	0.245352	-5.76793
hsa-miR-579	0.885475	4.58667	2.2562	0.0514744	0.225976	-5.61313
hsa-miR-580	0.0927239	4.2971	1.91654	0.0886714	0.294017	-6.13788
hsa-miR-581	-0.0926784	4.32824	-2.38847	0.041573	0.203996	-5.40228
hsa-miR-582-3p	-0.146903	4.29193	-3.3071	0.0095649	0.0898749	-3.9041
hsa-miR-582-5p	0.113302	4.32665	2.72922	0.0239758	0.152136	-4.84958
hsa-miR-583	0.135176	4.36605	2.40444	0.0405133	0.200997	-5.37664
hsa-miR-584	-0.0875657	5.67852	-1.76368	0.11278	0.333799	-6.36309
hsa-miR-585	-0.14892	4.35282	-3.62762	0.00582883	0.070111	-3.38597
hsa-miR-586	-0.126283	4.32407	-2.62892	0.0281847	0.163677	-5.01325
hsa-miR-587	0.0889025	4.26617	2.16001	0.0601001	0.244927	-5.76451
hsa-miR-588	0.0670499	4.27614	1.34879	0.211472	0.461191	-6.92356
hsa-miR-589	-0.103433	4.31334	-1.86692	0.0959088	0.307695	-6.21188
hsa-miR-589*	0.0584695	4.3593	1.29909	0.227292	0.476746	-6.98449
hsa-miR-590-3p	-0.258815	4.29711	-4.66828	0.00128401	0.033476	-1.77917
hsa-miR-590-5p	-0.183954	4.78455	-4.62562	0.00136199	0.0340373	-1.84231
hsa-miR-591	-0.179131	4.30159	-3.15058	0.012233	0.104097	-4.1595
hsa-miR-592	0.0403398	4.32302	1.04224	0.325403	0.572494	-7.27322
hsa-miR-593	0.0904856	4.2648	2.32492	0.0460698	0.214328	-5.50394
hsa-miR-593*	0.0895433	4.27814	1.83938	0.100162	0.314078	-6.25259
hsa-miR-595	-0.11532	4.36303	-2.21233	0.0552467	0.233031	-5.68241
hsa-miR-596	-0.155769	4.36716	-3.81695	0.00437673	0.061618	-3.08415
hsa-miR-597	-0.0390416	4.26462	-0.885042	0.399941	0.640524	-7.42549
hsa-miR-598	-0.0796847	4.30084	-2.20991	0.0554629	0.233031	-5.68623
hsa-miR-599	0.16309	4.32142	4.07432	0.00298809	0.0495987	-2.68007
hsa-miR-600	0.0967667	4.26157	1.82236	0.102878	0.318342	-6.27762
hsa-miR-601	-0.187679	5.03605	-1.06462	0.315711	0.564835	-7.24995
hsa-miR-602	0.0278097	4.60667	0.541738	0.601599	0.792453	-7.68229
hsa-miR-603	-0.0392943	4.35065	-0.92633	0.379262	0.621851	-7.38746
hsa-miR-604	0.254884	4.34967	4.19534	0.00250525	0.0458274	-2.49278
hsa-miR-605	0.0676913	4.2801	1.7391	0.117186	0.33921	-6.3985
hsa-miR-606	0.0904564	4.28655	1.38369	0.200931	0.449503	-6.87987
hsa-miR-607	-0.1551	4.33877	-4.15884	0.00264146	0.047186	-2.54909
hsa-miR-608	-0.0876372	4.2933	-1.98675	0.0793128	0.281362	-6.03187
hsa-miR-609	-0.26438	4.29974	-5.17346	0.000651813	0.0224708	-1.05092
hsa-miR-610	0.104103	4.38374	2.23639	0.0531455	0.228538	-5.64446
hsa-miR-611	-0.169155	4.27653	-4.03304	0.00317476	0.0517389	-2.74436
hsa-miR-612	-0.159953	4.26701	-4.20685	0.00246389	0.0456924	-2.47507
hsa-miR-613	-0.0794418	4.31262	-2.08684	0.0675911	0.260269	-5.87834
hsa-miR-614	0.0977541	4.37271	1.72744	0.11933	0.342852	-6.41521
hsa-miR-615-3p	-0.147856	4.30083	-3.28827	0.00985083	0.091027	-3.93475
hsa-miR-615-5p	0.219597	4.46771	4.02206	0.00322646	0.0519519	-2.7615
hsa-miR-616	1.66209	5.33119	29.9033	4.5e-10	2.02e-07	13.9676
hsa-miR-616*	0.126226	4.29528	3.35769	0.00883855	0.0856955	-3.82182
hsa-miR-617	-0.131582	4.402	-3.40128	0.00825899	0.0825698	-3.75106
hsa-miR-618	-0.0952483	4.35756	-1.94592	0.084634	0.289912	-6.0937
hsa-miR-619	-0.16776	4.28683	-4.14941	0.00267791	0.0473743	-2.56365
hsa-miR-620	0.0538682	4.32005	1.39755	0.19687	0.443742	-6.86232
hsa-miR-621	-0.139019	4.24908	-2.56937	0.0310308	0.171954	-5.11013
hsa-miR-622	-0.0649325	4.89277	-1.45738	0.180151	0.430538	-6.78532
hsa-miR-623	0.0872227	4.40024	2.44642	0.0378547	0.194741	-5.3091
hsa-miR-624	-0.114007	4.35252	-3.08178	0.0136406	0.109166	-4.27207
hsa-miR-624*	-0.14168	4.31993	-2.35735	0.0437178	0.208321	-5.45214
hsa-miR-625	-0.0753511	4.58447	-1.68644	0.127162	0.358051	-6.47354
hsa-miR-625*	-0.104699	4.38589	-2.3967	0.0410238	0.202463	-5.38908
hsa-miR-626	-0.171007	4.38354	-3.53639	0.00670276	0.0733915	-3.53261
hsa-miR-627	0.0878216	4.42978	2.00815	0.0766536	0.276302	-5.99928
hsa-miR-628-3p	0.11828	4.25344	2.15186	0.0608933	0.246599	-5.77726
hsa-miR-628-5p	-0.141052	4.51376	-3.44235	0.00774931	0.0804552	-3.6845
hsa-miR-629	0.32985	4.4716	2.08245	0.0680679	0.261105	-5.88513
hsa-miR-629*	0.180089	4.99721	3.30526	0.00959245	0.0898749	-3.90709
hsa-miR-630	-0.293292	4.48957	-3.51209	0.00695813	0.0741512	-3.5718
hsa-miR-631	-0.0764536	4.41436	-1.78497	0.109088	0.328118	-6.33222
hsa-miR-632	-0.0522269	4.32879	-0.957128	0.364349	0.610223	-7.35816
hsa-miR-633	0.153358	4.34737	3.80807	0.00443544	0.0621193	-3.09822
hsa-miR-634	0.0570719	4.36644	1.23209	0.250186	0.502932	-7.06419
hsa-miR-635	-0.115377	4.31091	-2.01025	0.0763966	0.276248	-5.99607
hsa-miR-636	0.0261006	4.38836	0.7229	0.488724	0.715211	-7.56048
hsa-miR-637	-0.107805	4.28756	-2.05007	0.0716886	0.269233	-5.93505
hsa-miR-638	0.29466	6.69752	7.73007	3.53e-05	0.00326869	2.11027
hsa-miR-639	-0.134491	4.28133	-2.627	0.0282724	0.163677	-5.01638
hsa-miR-640	0.0781191	4.33194	1.55091	0.156506	0.396404	-6.6611
hsa-miR-641	-0.245088	4.33408	-5.98423	0.000236666	0.0112297	0.0431865
hsa-miR-642	0.0950461	4.32619	2.04398	0.0723904	0.270164	-5.94441
hsa-miR-643	0.091748	4.27921	2.07134	0.0692901	0.264285	-5.90229
hsa-miR-644	-0.0550701	4.29644	-1.17763	0.270163	0.524904	-7.12677
hsa-miR-645	-0.14007	4.34348	-3.43832	0.00779795	0.0806488	-3.69104
hsa-miR-646	-0.125128	4.32823	-2.73434	0.0237788	0.15152	-4.84121
hsa-miR-647	-0.0919322	4.27568	-1.8686	0.0956547	0.307306	-6.20939
hsa-miR-648	-0.0563592	4.29826	-1.26674	0.238118	0.491245	-7.02334
hsa-miR-649	-0.0986088	4.28725	-2.08624	0.0676564	0.260269	-5.87927
hsa-miR-650	0.0775111	4.34222	1.33727	0.215053	0.46362	-6.93781
hsa-miR-651	-0.119038	4.31708	-3.03746	0.0146354	0.113088	-4.34466
hsa-miR-652	-0.181498	4.79444	-3.81925	0.00436166	0.061618	-3.08051
hsa-miR-653	0.0745199	4.32493	1.56165	0.153975	0.393572	-6.64654
hsa-miR-654-3p	0.16734	4.33975	3.24893	0.0104776	0.0942279	-3.99887
hsa-miR-654-5p	0.157253	4.62696	2.8977	0.018292	0.129781	-4.57373
hsa-miR-655	-0.0597181	4.32092	-1.25157	0.243341	0.495339	-7.04132
hsa-miR-656	-0.0607891	4.32317	-1.4227	0.189685	0.438428	-6.83019
hsa-miR-657	-0.132738	4.31027	-2.36405	0.0432473	0.207799	-5.44142
hsa-miR-658	0.0827979	4.31484	1.82799	0.101972	0.31632	-6.26934
hsa-miR-659	0.0612865	4.34256	1.48538	0.172762	0.421662	-6.74861
hsa-miR-660	-0.138728	4.49437	-3.32576	0.00928991	0.0878794	-3.87372
hsa-miR-661	0.118941	4.27835	3.05439	0.0142468	0.11169	-4.31693
hsa-miR-662	0.0500991	4.46116	1.01905	0.335686	0.583868	-7.29693
hsa-miR-663	0.082678	6.3841	1.49906	0.169248	0.416004	-6.73051
hsa-miR-663b	0.0238916	4.70121	0.493909	0.633603	0.808659	-7.70904
hsa-miR-664	-0.0986679	4.42678	-2.52336	0.0334263	0.178694	-5.18476
hsa-miR-664*	0.309527	4.70562	1.6367	0.137294	0.371413	-6.54334
hsa-miR-665	-0.0723455	4.31224	-1.79354	0.107635	0.326672	-6.31975
hsa-miR-668	-0.0862022	4.28081	-1.35504	0.209549	0.45935	-6.91578
hsa-miR-671-3p	0.10723	4.35226	2.60418	0.0293336	0.167792	-5.05353
hsa-miR-671-5p	-0.049401	5.13825	-0.803804	0.442924	0.677102	-7.49606
hsa-miR-675	0.106618	4.25706	2.79654	0.0215145	0.144018	-4.73945
hsa-miR-675*	0.0694355	4.274	1.41905	0.190714	0.439444	-6.83488
hsa-miR-7	-0.0722485	4.59075	-1.62436	0.139921	0.376214	-6.5605
hsa-miR-7-1*	-0.0937676	4.56477	-1.6516	0.134184	0.369316	-6.52254
hsa-miR-7-2*	-0.125028	4.30143	-2.43784	0.0383839	0.195204	-5.32293
hsa-miR-708	-0.184549	4.35789	-3.78067	0.00462205	0.0634117	-3.1417
hsa-miR-708*	0.195497	4.27664	4.35216	0.00200002	0.0410539	-2.25287
hsa-miR-720	-0.583114	11.7675	-4.08416	0.00294534	0.0493042	-2.66477
hsa-miR-744	-0.170729	4.55957	-3.57826	0.00628571	0.072542	-3.46523
hsa-miR-744*	-0.10281	4.33273	-2.26882	0.0504377	0.223438	-5.59315
hsa-miR-758	-0.190632	4.32203	-4.473	0.00168545	0.0367593	-2.0702
hsa-miR-760	0.185196	4.77031	3.3241	0.00931411	0.0878794	-3.87643
hsa-miR-765	-0.0425629	4.50869	-1.00479	0.342132	0.588133	-7.3113
hsa-miR-766	0.225339	4.35845	4.08262	0.00295202	0.0493042	-2.66717
hsa-miR-767-3p	0.279042	4.33996	4.83443	0.00102319	0.0302347	-1.5357
hsa-miR-767-5p	0.0725666	4.2982	1.28148	0.233134	0.485215	-7.00573
hsa-miR-769-3p	-0.147776	4.43068	-3.07424	0.0138048	0.109765	-4.28442
hsa-miR-769-5p	-0.293745	5.31359	-6.64195	0.00011082	0.0074499	0.865734
hsa-miR-770-5p	-0.0712841	4.41703	-1.58462	0.148686	0.387045	-6.61524
hsa-miR-802	-0.0761528	4.28993	-1.67048	0.130337	0.363285	-6.49606
hsa-miR-873	-0.0719357	4.33985	-1.36824	0.205538	0.453398	-6.89929
hsa-miR-874	0.0905983	5.40653	1.37563	0.203324	0.451105	-6.89002
hsa-miR-875-3p	-0.154061	4.30956	-3.18203	0.0116406	0.1013	-4.10809
hsa-miR-875-5p	-0.120896	4.3163	-2.7166	0.0244682	0.154279	-4.8702
hsa-miR-876-3p	0.103844	4.30692	2.35659	0.0437714	0.208321	-5.45335
hsa-miR-876-5p	0.162974	4.34585	3.8887	0.00393131	0.0579488	-2.97074
hsa-miR-877	0.184828	4.51172	3.54843	0.0065799	0.0730616	-3.51321
hsa-miR-877*	-0.133205	4.58275	-2.49093	0.0352259	0.18573	-5.23725
hsa-miR-885-3p	-0.0957845	4.36713	-2.01175	0.0762146	0.276224	-5.99378
hsa-miR-885-5p	-0.074783	4.29604	-1.84979	0.0985328	0.311955	-6.23722
hsa-miR-886-3p	-0.454725	9.43276	-8.38607	1.87e-05	0.00209881	2.79785
hsa-miR-886-5p	-0.26699	5.90306	-3.6408	0.00571288	0.070111	-3.36485
hsa-miR-887	-0.140114	4.39483	-3.06467	0.0140163	0.110527	-4.30011
hsa-miR-888	0.0420192	4.3001	1.10763	0.297711	0.550253	-7.20417
hsa-miR-888*	0.197286	4.3129	3.15614	0.0121261	0.103514	-4.15041
hsa-miR-889	-0.0445974	4.30844	-0.728363	0.485539	0.713767	-7.55632
hsa-miR-890	0.1631	4.2898	3.76899	0.00470405	0.0635997	-3.16025
hsa-miR-891a	-0.0200302	4.26379	-0.448059	0.665063	0.827559	-7.73248
hsa-miR-891b	0.0558598	4.31134	1.56805	0.152484	0.392749	-6.63785
hsa-miR-892a	0.0809919	4.37541	1.64123	0.136342	0.370702	-6.53703
hsa-miR-892b	-0.0888232	5.08005	-1.57597	0.150657	0.390287	-6.62705
hsa-miR-9	-0.0503157	4.30129	-1.05104	0.321564	0.569998	-7.26412
hsa-miR-9*	-0.0967957	4.37222	-1.96373	0.0822725	0.285887	-6.0668
hsa-miR-920	0.126448	4.30633	3.41241	0.0081175	0.0825105	-3.73301
hsa-miR-921	0.154061	4.31121	3.19783	0.0113543	0.0994522	-4.08228
hsa-miR-922	0.0397073	4.27988	1.02481	0.333111	0.580824	-7.29108
hsa-miR-923_v12.0	-0.501368	10.8984	-3.12209	0.0127968	0.105373	-4.20611
hsa-miR-924	0.0861873	4.31987	1.95498	0.0834242	0.288512	-6.08002
hsa-miR-92a	0.132734	6.78121	2.10583	0.0655646	0.256438	-5.84893
hsa-miR-92a-1*	0.144511	4.34406	3.09107	0.0134412	0.108214	-4.25687
hsa-miR-92a-2*	-0.142971	4.35883	-3.64437	0.00568189	0.070111	-3.35913
hsa-miR-92b	-0.0398542	4.5123	-0.933841	0.375585	0.618461	-7.38038
hsa-miR-92b*	-0.07739	4.26309	-1.74857	0.115469	0.337495	-6.38488
hsa-miR-93	-0.243825	7.23459	-5.54615	0.000404596	0.0164842	-0.536661
hsa-miR-93*	-0.167809	4.34203	-4.59559	0.00141993	0.0347109	-1.8869
hsa-miR-933	0.109023	4.36264	1.75242	0.114777	0.336031	-6.37933
hsa-miR-934	-0.0380008	4.26863	-0.95029	0.367623	0.610963	-7.36473
hsa-miR-935	0.115431	4.3551	2.94138	0.0170576	0.122314	-4.50213
hsa-miR-936	-0.0788666	4.36683	-2.18911	0.0573518	0.238829	-5.71892
hsa-miR-937	-0.100469	4.26791	-2.07762	0.0685963	0.262757	-5.89259
hsa-miR-938	-0.146176	4.28753	-2.65743	0.0269176	0.16077	-4.9668
hsa-miR-939	0.131922	6.58018	2.1467	0.0614004	0.248279	-5.78532
hsa-miR-940	0.014266	5.48427	0.25928	0.801452	0.905886	-7.80568
hsa-miR-941	0.18651	4.23665	4.33588	0.002047	0.0416998	-2.27763
hsa-miR-942	0.15017	4.333	2.374	0.0425569	0.207051	-5.42548
hsa-miR-943	0.119955	4.28516	2.16372	0.0597428	0.244518	-5.75871
hsa-miR-944	-0.0575494	4.40229	-1.06347	0.316204	0.564958	-7.25116
hsa-miR-95	-0.0715062	4.35232	-1.38404	0.200827	0.449503	-6.87943
hsa-miR-96	-0.155521	6.95833	-2.17975	0.0582219	0.241603	-5.7336
hsa-miR-96*	0.100977	4.27846	1.93372	0.0862886	0.291495	-6.11208
hsa-miR-98	0.102084	4.48001	2.01545	0.0757657	0.275421	-5.98813
hsa-miR-99a	0.0579075	4.29322	1.61714	0.141476	0.37741	-6.57049
hsa-miR-99a*	0.220929	4.30698	4.60796	0.00139574	0.0344325	-1.86851
hsa-miR-99b	-0.365974	5.74404	-6.49418	0.000130809	0.00818011	0.685794
hsa-miR-99b*	0.270466	5.25394	3.88659	0.00394371	0.0579488	-2.97406
