# Supplementary material for: Identification of miR-145 targets through an integrated omics analysis
Source: Royal Society of Chemistry journal article supplement (doi:10.1039/c4mb00585f), 2014-10-23
Supplement: c4mb00585f6.xlsx [file c4mb00585f6.xlsx]

## Sheet: silac_mirmatch.csv
Accession	Description	GeneSymbol	log2HoverL	HoverL	CDSmatch	3UTRmatch	8mer	refseq
58535453	CDK5 regulatory subunit-associated protein 2 isoform b [Homo sapiens]	CDK5RAP2	-2.92139	0.13	4	0	0	NP_116045.2
195972866	keratin, type I cytoskeletal 10 [Homo sapiens]	KRT10	-2.82623	0.14	1	0	0	NP_001159631.1
82617546	cyclic nucleotide-gated cation channel alpha-4 [Homo sapiens]	CNGA4	-1.84684	0.28	0	0	0	NP_005841.1
262231746	protein ALO17 isoform 1 [Homo sapiens]	RNF213	-1.72738	0.3	8	3	0	NP_000867.2
5454084	serine palmitoyltransferase 1 isoform a [Homo sapiens]	SPTLC1	-1.48197	0.36	3	1	0	NP_005424.1
156938331	pre-mRNA-processing factor 39 [Homo sapiens]	PRPF39	-1.44615	0.37	0	0	0	NP_001166299.1
56549656	hypothetical protein LOC147339 isoform b [Homo sapiens]	C18orf25	-1.38836	0.38	1	1	0	NP_003632.3
134142335	multidrug resistance-associated protein 1 isoform 5 [Homo sapiens]	ABCC1	-1.36959	0.39	2	1	0	NP_001137416.1
93102364	switch-associated protein 70 [Homo sapiens]	SWAP70	-1.31833	0.4	5	3	1	NP_001120695.1
4506583	replication protein A 70 kDa DNA-binding subunit [Homo sapiens]	RPA1	-1.25843	0.42	1	1	1	NP_001790.1
290543591	YTH domain family protein 2 isoform 2 [Homo sapiens]	YTHDF2	-1.22769	0.43	2	2	2	NP_068766.1
19923475	tRNA (adenine-N(1)-)-methyltransferase non-catalytic subunit TRM6 [Homo sapiens]	TRMT6	-1.22769	0.43	1	0	0	NP_000467.1
50345997	histone acetyltransferase p300 [Homo sapiens]	EP300	-1.22095	0.43	0	0	0	NP_062535.2
306966132	spectrin alpha chain, brain isoform 3 [Homo sapiens]	SPTAN1	-1.21759	0.43	0	0	0	NP_001077083.1
4507115	fascin [Homo sapiens]	FSCN1	-1.21424	0.43	2	4	3	NP_004252.2
4826742	glucosamine--fructose-6-phosphate aminotransferase [isomerizing] 2 [Homo sapiens]	GFPT2	-1.17462	0.44	0	0	0	NP_710154.1
38373669	protein transport protein Sec24C [Homo sapiens]	SEC24C	-1.16812	0.45	2	1	0	NP_001036143.1
304376294	conserved oligomeric Golgi complex subunit 4 isoform 2 [Homo sapiens]	COG4	-1.14242	0.45	0	0	0	NP_006798.1
19923732	general transcription factor IIH subunit 3 [Homo sapiens]	GTF2H3	-1.13924	0.45	0	0	0	NP_000840.2
140972063	neurabin-2 [Homo sapiens]	PPP1R9B	-1.1078	0.46	2	3	0	NP_940684.1
24234683	ubiquitin carboxyl-terminal hydrolase 11 [Homo sapiens]	USP11	-1.09851	0.47	0	0	0	NP_002504.2
40354201	deoxyribonucleoside 5'-monophosphate N-glycosidase isoform 2 [Homo sapiens]	C6orf108	-1.08927	0.47	0	0	0	NP_001001665.3
16418383	nucleus accumbens-associated protein 1 [Homo sapiens]	NACC1	-1.04692	0.48	0	1	0	NP_061924.1
119395750	keratin, type II cytoskeletal 1 [Homo sapiens]	KRT1	-1.02327	0.49	0	0	0	NP_006001.3
112382250	spectrin beta chain, brain 1 isoform 1 [Homo sapiens]	SPTBN1	-1.0145	0.5	6	1	0	NP_004477.3
108773782	ATP-binding cassette sub-family E member 1 [Homo sapiens]	ABCE1	-1.00868	0.5	0	0	0	NP_004530.1
13376243	chromosome 10 open reading frame 119 [Homo sapiens]	MCMBP	-0.99137	0.5	0	1	0	NP_057111.1
38492356	DNA polymerase delta subunit 3 [Homo sapiens]	POLD3	-0.99137	0.5	0	1	0	NP_004748.2
211057406	transcription factor BTF3 homolog 4 isoform 2 [Homo sapiens]	BTF3L4	-0.982791	0.51	0	1	1	NP_006316.1
13376429	NEFA-interacting nuclear protein NIP30 [Homo sapiens]	FAM192A	-0.9771	0.51	0	0	0	NP_060918.2
11067749	bromodomain-containing protein 3 [Homo sapiens]	BRD3	-0.9771	0.51	1	1	0	NP_001020.2
19923345	RNA-binding protein 12 [Homo sapiens]	RBM12	-0.96016	0.51	0	0	0	NP_005561.1
170763500	protein SET isoform 1 [Homo sapiens]	SET	-0.954557	0.52	0	1	0	XP_003119962.1
28372531	serine/threonine-protein phosphatase 4 regulatory subunit 2 [Homo sapiens]	PPP4R2	-0.946194	0.52	4	0	0	NP_057185.1
4758668	serine palmitoyltransferase 2 [Homo sapiens]	SPTLC2	-0.937878	0.52	3	1	0	NP_115806.1
186928841	conserved oligomeric Golgi complex subunit 8 [Homo sapiens]	COG8	-0.915936	0.53	2	1	0	NP_001352.2
5453710	LIM and SH3 domain protein 1 [Homo sapiens]	LASP1	-0.902389	0.54	0	1	1	NP_005871.1
187830855	cellular tumor antigen p53 isoform b [Homo sapiens]	TP53	-0.899695	0.54	2	0	0	NP_057117.2
6005719	probable ergosterol biosynthetic protein 28 [Homo sapiens]	C14orf1	-0.878321	0.54	0	0	0	NP_057562.3
4759034	eukaryotic peptide chain release factor subunit 1 [Homo sapiens]	ETF1	-0.870387	0.55	0	1	0	NP_001198.2
264681556	WD repeat-containing protein 26 isoform b [Homo sapiens]	WDR26	-0.867752	0.55	1	0	0	NP_079199.2
5031703	ras GTPase-activating protein-binding protein 1 [Homo sapiens]	G3BP1	-0.859876	0.55	0	2	1	NP_001128626.1
4506217	26S proteasome non-ATPase regulatory subunit 10 isoform 1 [Homo sapiens]	PSMD10	-0.852042	0.55	1	0	0	NP_005111.2
258613987	zinc finger homeobox protein 3 isoform B [Homo sapiens]	ZFHX3	-0.84944	0.56	0	0	0	NP_002406.1
214010185	amyloid-like protein 2 isoform 4 [Homo sapiens]	APLP2	-0.841663	0.56	0	0	0	NP_064576.1
7706557	chromosome 9 open reading frame 78 [Homo sapiens]	C9orf78	-0.83908	0.56	1	0	0	NP_000131.2
33469968	DNA replication licensing factor MCM7 isoform 1 [Homo sapiens]	MCM7	-0.833927	0.56	0	0	0	NP_005380.2
50053795	eukaryotic translation initiation factor 4B [Homo sapiens]	EIF4B	-0.831358	0.56	2	1	0	NP_115664.2
27262628	nuclear autoantigenic sperm protein isoform 2 [Homo sapiens]	NASP	-0.828793	0.56	0	0	0	NP_005318.3
190194365	poly(A) RNA polymerase, mitochondrial precursor [Homo sapiens]	MTPAP	-0.828793	0.56	0	0	0	NP_000391.1
223555975	tropomyosin alpha-4 chain isoform 1 [Homo sapiens]	TPM4	-0.818579	0.57	2	1	0	NP_116106.2
4504011	glutamate--cysteine ligase regulatory subunit [Homo sapiens]	GCLM	-0.813499	0.57	0	2	0	NP_060691.2
323362983	ubiquitin conjugation factor E4 A isoform 2 [Homo sapiens]	UBE4A	-0.810966	0.57	0	0	0	NP_071349.3
83700235	eukaryotic initiation factor 4A-II [Homo sapiens]	EIF4A2	-0.810966	0.57	1	1	0	NP_001182033.1
14670268	negative elongation factor E [Homo sapiens]	RDBP	-0.808437	0.57	0	0	0	NP_001182356.1
30410794	proteasome activator complex subunit 3 isoform 1 [Homo sapiens]	PSME3	-0.793357	0.58	1	0	0	NP_004452.1
63252913	macrophage-capping protein [Homo sapiens]	CAPG	-0.793357	0.58	2	0	0	NP_004893.1
78000213	DNA methyltransferase 1-associated protein 1 [Homo sapiens]	DMAP1	-0.788365	0.58	0	0	0	NP_005430.1
20070260	negative elongation factor B [Homo sapiens]	COBRA1	-0.785875	0.58	0	0	0	NP_001186308.1
13129044	phosducin-like protein 3 [Homo sapiens]	PDCL3	-0.785875	0.58	0	0	0	NP_061910.1
5454088	acidic leucine-rich nuclear phosphoprotein 32 family member B [Homo sapiens]	ANP32B	-0.78339	0.58	0	0	0	NP_056377.1
4557761	DNA mismatch repair protein Msh2 [Homo sapiens]	MSH2	-0.78339	0.58	1	0	0	NP_001122326.1
15149465	caldesmon isoform 5 [Homo sapiens]	CALD1	-0.78339	0.58	1	0	0	NP_055114.1
45505149	nuclear factor 1 C-type isoform 1 [Homo sapiens]	NFIC	-0.780909	0.58	2	1	0	NP_620147.1
13129078	tether containing UBX domain for GLUT4 [Homo sapiens]	ASPSCR1	-0.77596	0.58	0	0	0	NP_003137.1
33598950	podocalyxin isoform 2 precursor [Homo sapiens]	PODXL	-0.77596	0.58	1	4	0	NP_037507.1
10835073	glycylpeptide N-tetradecanoyltransferase 1 [Homo sapiens]	NMT1	-0.76366	0.59	2	0	0	NP_076962.2
42734503	caprin-1 isoform 2 [Homo sapiens]	CAPRIN1	-0.76366	0.59	1	0	0	NP_005511.1
55749442	transcription elongation factor A protein-like 4 [Homo sapiens]	TCEAL4	-0.756331	0.59	0	0	0	NP_005993.1
5453682	protein HEXIM1 [Homo sapiens]	HEXIM1	-0.756331	0.59	1	2	0	NP_004902.1
116063554	putative deoxyribose-phosphate aldolase [Homo sapiens]	DERA	-0.751465	0.59	3	0	0	NP_001029025.1
18104959	thioredoxin domain-containing protein 9 [Homo sapiens]	TXNDC9	-0.744197	0.6	1	1	1	NP_076976.1
199559805	phostensin [Homo sapiens]	KIAA1949	-0.734563	0.6	5	0	0	NP_001034455.1
116734706	interferon regulatory factor 2-binding protein 2 isoform B [Homo sapiens]	IRF2BP2	-0.732165	0.6	1	0	0	NP_003739.2
4502897	cleft lip and palate transmembrane protein 1 isoform 2 [Homo sapiens]	CLPTM1	-0.72738	0.6	2	0	0	NP_068756.2
4503351	DNA (cytosine-5)-methyltransferase 1 isoform b [Homo sapiens]	DNMT1	-0.72738	0.6	2	0	0	NP_982257.1
24497601	endothelial differentiation-related factor 1 isoform beta [Homo sapiens]	EDF1	-0.72261	0.61	0	0	0	NP_002701.1
14210504	AP-1 complex subunit mu-1 isoform 2 [Homo sapiens]	AP1M1	-0.717857	0.61	0	0	0	NP_001139196.1
66363688	NEDD8-activating enzyme E1 regulatory subunit isoform c [Homo sapiens]	NAE1	-0.713119	0.61	0	0	0	NP_071415.1
4505585	platelet-activating factor acetylhydrolase IB subunit beta isoform a [Homo sapiens]	PAFAH1B2	-0.708396	0.61	1	3	0	NP_056044.3
4503727	peptidyl-prolyl cis-trans isomerase FKBP3 [Homo sapiens]	FKBP3	-0.706041	0.61	1	1	1	NP_006351.2
119220557	multifunctional protein ADE2 isoform 2 [Homo sapiens]	PAICS	-0.706041	0.61	1	0	0	NP_006003.1
5032069	splicing factor 3B subunit 4 [Homo sapiens]	SF3B4	-0.703689	0.61	0	0	0	NP_005944.1
11345458	hypothetical protein LOC60526 [Homo sapiens]	C2orf43	-0.703689	0.61	0	0	0	NP_859049.2
68989263	peroxisomal bifunctional enzyme isoform 1 [Homo sapiens]	EHHADH	-0.703689	0.61	3	0	0	NP_067062.1
17999539	pre-mRNA-splicing factor ATP-dependent RNA helicase PRP16 [Homo sapiens]	DHX38	-0.694321	0.62	2	0	0	NP_000662.3
5032133	eukaryotic translation initiation factor 1 [Homo sapiens]	EIF1	-0.691989	0.62	0	0	0	NP_001062.1
33519455	methionine adenosyltransferase 2 subunit beta isoform 2 [Homo sapiens]	MAT2B	-0.68966	0.62	0	0	0	NP_148982.1
114155144	tropomyosin alpha-3 chain isoform 4 [Homo sapiens]	TPM3	-0.687335	0.62	0	3	3	NP_060924.4
14591904	ATP-dependent DNA helicase Q1 [Homo sapiens]	RECQL	-0.687335	0.62	2	0	0	NP_001030590.1
188219595	formation of mitochondrial complexes 1 homolog [Homo sapiens]	C7orf55	-0.685014	0.62	0	0	0	NP_057310.1
224809327	peptidyl-prolyl cis-trans isomerase FKBP5 isoform 1 [Homo sapiens]	FKBP5	-0.685014	0.62	1	0	0	NP_001518.3
255760064	COP9 signalosome complex subunit 7a [Homo sapiens]	COPS7A	-0.682696	0.62	0	1	0	NP_057110.3
155722990	kanadaptin [Homo sapiens]	SLC4A1AP	-0.680382	0.62	3	0	0	XP_003119578.1
171543879	CD99 antigen isoform b precursor [Homo sapiens]	CD99	-0.678072	0.63	0	0	0	NP_059142.2
4503523	eukaryotic translation initiation factor 3 subunit D [Homo sapiens]	EIF3D	-0.678072	0.63	2	0	0	NP_116120.1
284813529	protein VPRBP isoform 2 [Homo sapiens]	VPRBP	-0.675765	0.63	3	1	0	NP_003536.1
50727002	pseudouridylate synthase 7 homolog [Homo sapiens]	PUS7	-0.673463	0.63	0	1	0	NP_003008.1
221136753	chromodomain Y-like protein isoform d [Homo sapiens]	CDYL	-0.671164	0.63	1	0	0	NP_060764.3
15826852	Golgi resident protein GCP60 [Homo sapiens]	ACBD3	-0.668868	0.63	1	1	0	NP_000347.2
4757804	copper transport protein ATOX1 [Homo sapiens]	ATOX1	-0.666576	0.63	0	0	0	NP_001036024.3
63025214	vacuolar ATPase assembly integral membrane protein VMA21 [Homo sapiens]	VMA21	-0.666576	0.63	0	3	1	NP_001157739.1
10835067	lupus La protein [Homo sapiens]	SSB	-0.659723	0.63	2	0	0	NP_005345.3
4503165	cullin-3 [Homo sapiens]	CUL3	-0.657445	0.63	2	0	0	NP_036270.1
4885661	proto-oncogene tyrosine-protein kinase Yes [Homo sapiens]	YES1	-0.655172	0.64	0	0	0	NP_612366.1
10863955	phosphoserine aminotransferase isoform 2 [Homo sapiens]	PSAT1	-0.655172	0.64	0	1	1	NP_001188474.1
4506717	40S ribosomal protein S29 isoform 1 [Homo sapiens]	RPS29	-0.650635	0.64	1	0	0	NP_036272.2
7427519	DNA replication licensing factor MCM6 [Homo sapiens]	MCM6	-0.650635	0.64	1	0	0	NP_001164551.1
18375501	DNA-(apurinic or apyrimidinic site) lyase [Homo sapiens]	APEX1	-0.650635	0.64	1	0	0	NP_113680.1
56118310	nuclear ubiquitous casein and cyclin-dependent kinases substrate [Homo sapiens]	NUCKS1	-0.641604	0.64	0	4	0	NP_006786.2
4885579	cell differentiation protein RCD1 homolog [Homo sapiens]	RQCD1	-0.639355	0.64	0	0	0	NP_057146.1
215490021	mortality factor 4-like protein 2 [Homo sapiens]	MORF4L2	-0.639355	0.64	0	0	0	NP_997177.1
5730041	suppressor of G2 allele of SKP1 homolog isoform SGT1A [Homo sapiens]	SUGT1	-0.639355	0.64	1	0	0	NP_695000.1
13376735	N-alpha-acetyltransferase 50, NatE catalytic subunit [Homo sapiens]	NAA50	-0.637109	0.64	0	0	0	NP_002259.1
256818791	transmembrane protein 164 isoform a [Homo sapiens]	TMEM164	-0.634867	0.64	0	0	0	NP_060707.2
5803092	methionine aminopeptidase 2 [Homo sapiens]	METAP2	-0.632629	0.65	3	0	0	NP_059830.1
7019503	prolactin regulatory element-binding protein [Homo sapiens]	PREB	-0.632629	0.65	1	0	0	NP_005580.1
121114302	cullin-4B isoform 2 [Homo sapiens]	CUL4B	-0.632629	0.65	2	1	0	NP_060934.1
4758356	flap endonuclease 1 [Homo sapiens]	FEN1	-0.630394	0.65	0	0	0	NP_031389.3
7706337	coatomer subunit zeta-1 [Homo sapiens]	COPZ1	-0.630394	0.65	0	1	0	NP_859531.1
4557831	pterin-4-alpha-carbinolamine dehydratase precursor [Homo sapiens]	PCBD1	-0.628162	0.65	1	0	0	NP_001279.2
40288288	histone-arginine methyltransferase CARM1 [Homo sapiens]	CARM1	-0.628162	0.65	0	1	0	NP_038203.2
33469917	DNA replication licensing factor MCM4 [Homo sapiens]	MCM4	-0.619271	0.65	1	0	0	NP_000382.3
4505641	proliferating cell nuclear antigen [Homo sapiens]	PCNA	-0.617056	0.65	0	0	0	NP_004688.2
5031569	alpha-centractin [Homo sapiens]	ACTR1A	-0.617056	0.65	0	0	0	NP_060295.1
21361659	importin-9 [Homo sapiens]	IPO9	-0.617056	0.65	0	1	0	NP_741982.1
4758340	phenylalanyl-tRNA synthetase alpha chain [Homo sapiens]	FARSA	-0.614845	0.65	1	0	0	NP_004449.1
56117850	cold shock domain-containing protein E1 isoform 2 [Homo sapiens]	CSDE1	-0.612637	0.65	1	0	0	NP_001138552.2
13399304	DNA dC-_dU-editing enzyme APOBEC-3G [Homo sapiens]	APOBEC3G	-0.610433	0.66	0	0	0	NP_892117.1
114326455	chromodomain-helicase-DNA-binding protein 8 isoform 2 [Homo sapiens]	CHD8	-0.610433	0.66	0	0	0	NP_060914.2
72534670	phospholipase A-2-activating protein [Homo sapiens]	PLAA	-0.610433	0.66	2	0	0	NP_005435.1
4503529	eukaryotic initiation factor 4A-I isoform 1 [Homo sapiens]	EIF4A1	-0.608232	0.66	2	0	0	NP_149073.1
61835148	fragile X mental retardation syndrome-related protein 1 isoform a [Homo sapiens]	FXR1	-0.608232	0.66	1	1	0	NP_542160.1
117553580	AP-3 complex subunit delta-1 isoform 2 [Homo sapiens]	AP3D1	-0.606035	0.66	0	0	0	NP_891556.1
68051721	neutral cholesterol ester hydrolase 1 isoform b [Homo sapiens]	NCEH1	-0.606035	0.66	1	2	1	NP_061961.2
42794779	myosin-XVIIIa isoform b [Homo sapiens]	MYO18A	-0.606035	0.66	5	0	0	NP_001032900.1
23397429	eukaryotic translation initiation factor 3 subunit M [Homo sapiens]	EIF3M	-0.603841	0.66	1	0	0	NP_065777.1
4506387	UV excision repair protein RAD23 homolog B [Homo sapiens]	RAD23B	-0.599462	0.66	0	4	1	NP_003790.1
15147337	E3 ubiquitin-protein ligase UBR5 [Homo sapiens]	UBR5	-0.599462	0.66	5	0	0	NP_006283.1
94721330	RUN and FYVE domain-containing protein 1 isoform b [Homo sapiens]	RUFY1	-0.599462	0.66	3	0	0	NP_085056.2
260064009	ubiquitin carboxyl-terminal hydrolase 24 [Homo sapiens]	USP24	-0.597278	0.66	8	2	0	NP_057225.2
21269877	cysteinyl-tRNA synthetase, cytoplasmic isoform a [Homo sapiens]	CARS	-0.592919	0.66	0	0	0	NP_057267.2
17978519	vacuolar protein sorting-associated protein 26A isoform 1 [Homo sapiens]	VPS26A	-0.592919	0.66	0	1	0	NP_071413.1
24308049	peptidylprolyl isomerase domain and WD repeat-containing protein 1 [Homo sapiens]	PPWD1	-0.590745	0.66	4	0	0	NP_060615.1
217416379	heterogeneous nuclear ribonucleoprotein L-like isoform 2 [Homo sapiens]	HNRPLL	-0.590745	0.66	0	1	0	NP_005727.1
34304333	RING-box protein 2 isoform 3 [Homo sapiens]	RNF7	-0.588574	0.67	0	0	0	NP_056349.1
83281438	eukaryotic translation initiation factor 3 subunit J [Homo sapiens]	EIF3J	-0.588574	0.67	0	1	1	NP_068593.2
93352551	CWF19-like protein 1 [Homo sapiens]	CWF19L1	-0.586406	0.67	2	0	0	NP_061899.1
10801345	eukaryotic translation initiation factor 3 subunit K [Homo sapiens]	EIF3K	-0.584241	0.67	0	0	0	NP_001191315.1
170932516	paxillin isoform 2 [Homo sapiens]	PXN	-0.584241	0.67	2	2	1	NP_001171500.1
33356547	DNA replication licensing factor MCM2 [Homo sapiens]	MCM2	-0.579922	0.67	0	0	0	NP_006538.2
4504341	histone acetyltransferase type B catalytic subunit [Homo sapiens]	HAT1	-0.579922	0.67	2	0	0	NP_002140.2
71772942	AP-1 complex subunit gamma-1 isoform b [Homo sapiens]	AP1G1	-0.577767	0.67	0	4	2	NP_055535.2
4507711	tetratricopeptide repeat protein 1 [Homo sapiens]	TTC1	-0.577767	0.67	1	0	0	NP_002004.1
19557636	peptidyl-prolyl cis-trans isomerase-like 3 isoform PPIL3b [Homo sapiens]	PPIL3	-0.577767	0.67	1	0	0	NP_001760.1
24308207	leucine-rich repeat-containing protein 47 [Homo sapiens]	LRRC47	-0.575615	0.67	0	0	0	NP_078938.2
29550838	Golgi membrane protein 1 [Homo sapiens]	GOLM1	-0.575615	0.67	1	3	2	NP_000929.1
256222415	filamin-B isoform 4 [Homo sapiens]	FLNB	-0.575615	0.67	3	2	1	NP_005861.2
4503481	elongation factor 1-gamma [Homo sapiens]	EEF1G	-0.573467	0.67	4	0	0	NP_001159693.1
4506647	60S ribosomal protein L39 [Homo sapiens]	RPL39	-0.571322	0.67	1	0	0	NP_001186851.1
7657441	28 kDa heat- and acid-stable phosphoprotein [Homo sapiens]	PDAP1	-0.567041	0.68	1	0	0	NP_002789.1
23510448	DNA replication licensing factor MCM5 [Homo sapiens]	MCM5	-0.564905	0.68	1	1	0	NP_443157.1
33239445	eukaryotic translation initiation factor 3 subunit B [Homo sapiens]	EIF3B	-0.562772	0.68	0	0	0	NP_001156333.1
53759151	acyl-CoA desaturase [Homo sapiens]	SCD	-0.562772	0.68	0	0	0	NP_005557.1
197304670	methylated-DNA--protein-cysteine methyltransferase [Homo sapiens]	MGMT	-0.562772	0.68	1	0	0	NP_003786.1
14043024	BAG family molecular chaperone regulator 3 [Homo sapiens]	BAG3	-0.560643	0.68	0	1	0	NP_005887.2
7656879	AF4/FMR2 family member 4 [Homo sapiens]	AFF4	-0.558517	0.68	0	0	0	NP_003136.1
7706343	mitotic spindle-associated MMXD complex subunit MIP18 [Homo sapiens]	FAM96B	-0.558517	0.68	0	0	0	NP_000282.1
149944496	UBX domain-containing protein 7 [Homo sapiens]	UBXN7	-0.558517	0.68	2	1	0	NP_001138303.1
124494254	proliferation-associated protein 2G4 [Homo sapiens]	PA2G4	-0.556393	0.68	0	0	0	NP_001139688.1
31543385	choline-phosphate cytidylyltransferase A [Homo sapiens]	PCYT1A	-0.554273	0.68	0	0	0	NP_002893.1
38788219	zinc finger protein 428 [Homo sapiens]	ZNF428	-0.554273	0.68	0	0	0	NP_005485.1
271398277	cytosolic non-specific dipeptidase isoform 2 [Homo sapiens]	CNDP2	-0.554273	0.68	0	1	1	NP_001818.1
239049591	glycogen [starch] synthase, muscle isoform 2 [Homo sapiens]	GYS1	-0.554273	0.68	3	0	0	NP_005787.1
4506687	40S ribosomal protein S15 [Homo sapiens]	RPS15	-0.552156	0.68	0	0	0	NP_976240.1
20911035	peptidyl-prolyl cis-trans isomerase-like 4 [Homo sapiens]	PPIL4	-0.552156	0.68	2	0	0	NP_002216.2
217035118	TBC1 domain family member 23 isoform 2 [Homo sapiens]	TBC1D23	-0.552156	0.68	0	1	0	NP_003119.2
4503515	eukaryotic translation initiation factor 3 subunit H [Homo sapiens]	EIF3H	-0.550043	0.68	0	0	0	NP_006286.1
6631095	DNA replication licensing factor MCM3 [Homo sapiens]	MCM3	-0.550043	0.68	2	0	0	NP_004474.2
24307965	UBX domain-containing protein 4 [Homo sapiens]	UBXN4	-0.547932	0.68	2	2	1	NP_001001975.1
5031977	nicotinamide phosphoribosyltransferase precursor [Homo sapiens]	NAMPT	-0.547932	0.68	2	3	0	NP_005057.1
4758516	hepatoma-derived growth factor isoform a [Homo sapiens]	HDGF	-0.545824	0.69	0	0	0	NP_001017958.1
226246537	zinc finger protein 407 isoform 3 [Homo sapiens]	ZNF407	-0.545824	0.69	0	0	0	NP_001185797.1
6912734	transportin-3 isoform 1 [Homo sapiens]	TNPO3	-0.541618	0.69	0	0	0	NP_277035.2
306482646	serine/arginine-rich splicing factor 2 [Homo sapiens]	SRSF2	-0.541618	0.69	0	0	0	NP_004983.1
21361337	eukaryotic translation initiation factor 5 [Homo sapiens]	EIF5	-0.541618	0.69	1	2	1	NP_055955.1
49472822	eukaryotic translation initiation factor 3 subunit G [Homo sapiens]	EIF3G	-0.541618	0.69	3	0	0	NP_005681.2
193083114	poly(rC)-binding protein 2 isoform g [Homo sapiens]	PCBP2	-0.541618	0.69	2	2	0	NP_060336.3
217330646	activated RNA polymerase II transcriptional coactivator p15 [Homo sapiens]	SUB1	-0.541618	0.69	0	1	0	NP_006695.1
93141029	paralemmin isoform 2 [Homo sapiens]	PALM	-0.537424	0.69	0	0	0	NP_071383.1
118150660	zinc finger CCCH domain-containing protein 15 [Homo sapiens]	ZC3H15	-0.535332	0.69	1	0	0	NP_996735.1
31541941	heat shock 70 kDa protein 4L [Homo sapiens]	HSPA4L	-0.533242	0.69	2	0	0	NP_001164120.1
38569471	leucine-rich repeat-containing protein 41 [Homo sapiens]	LRRC41	-0.533242	0.69	2	0	0	NP_003968.2
23110925	proteasome subunit beta type-6 precursor [Homo sapiens]	PSMB6	-0.524915	0.7	0	0	0	NP_005462.1
5803191	transcription elongation factor A protein 1 isoform 1 [Homo sapiens]	TCEA1	-0.524915	0.7	0	1	0	NP_001030168.1
66346685	plasminogen activator inhibitor 1 RNA-binding protein isoform 4 [Homo sapiens]	SERBP1	-0.524915	0.7	0	2	0	NP_057501.2
117606357	gamma-secretase subunit APH-1A isoform 2 [Homo sapiens]	APH1A	-0.524915	0.7	0	3	0	NP_036350.2
21361322	tubulin beta-4 chain [Homo sapiens]	TUBB4	-0.522841	0.7	1	0	0	NP_001177916.1
63252870	protein OS-9 isoform 4 precursor [Homo sapiens]	OS9	-0.522841	0.7	2	1	0	NP_001180432.1
195539349	putative adenosylhomocysteinase 3 isoform d [Homo sapiens]	AHCYL2	-0.522841	0.7	2	0	0	NP_057488.1
224809419	homer protein homolog 3 isoform 3 [Homo sapiens]	HOMER3	-0.522841	0.7	1	0	0	NP_057299.1
9558751	ADP-ribosylation factor-binding protein GGA2 [Homo sapiens]	GGA2	-0.520769	0.7	0	0	0	NP_003809.1
18087821	CDKN2AIP N-terminal-like protein [Homo sapiens]	CDKN2AIPNL	-0.520769	0.7	0	0	0	NP_009038.1
33859837	ribonuclease P protein subunit p38 [Homo sapiens]	RPP38	-0.520769	0.7	0	0	0	NP_004628.4
194733742	negative elongation factor A [Homo sapiens]	WHSC2	-0.520769	0.7	1	0	0	NP_647539.1
12408675	prefoldin subunit 2 [Homo sapiens]	PFDN2	-0.518701	0.7	0	0	0	NP_006353.2
310113908	PREDICTED: 40S ribosomal protein S21-like isoform 1 [Homo sapiens]	LOC100291837	-0.518701	0.7	0	0	0	NP_060282.1
52145310	GDH/6PGL endoplasmic bifunctional protein precursor [Homo sapiens]	H6PD	-0.518701	0.7	0	2	0	NP_001078.2
13489073	egl nine homolog 1 [Homo sapiens]	EGLN1	-0.516636	0.7	0	0	0	NP_002523.2
20070130	transcription factor BTF3 isoform B [Homo sapiens]	BTF3	-0.516636	0.7	1	0	0	NP_057662.3
7705433	eukaryotic translation initiation factor 3 subunit L [Homo sapiens]	EIF3L	-0.514573	0.7	0	0	0	NP_116294.1
307078125	clathrin interactor 1 isoform 3 [Homo sapiens]	CLINT1	-0.514573	0.7	0	0	0	NP_003356.2
4506203	proteasome subunit beta type-7 proprotein [Homo sapiens]	PSMB7	-0.514573	0.7	1	0	0	NP_002686.2
154448892	exportin-7 [Homo sapiens]	XPO7	-0.514573	0.7	2	2	0	NP_006004.2
289577114	eukaryotic translation initiation factor 4 gamma 2 isoform 2 [Homo sapiens]	EIF4G2	-0.514573	0.7	1	0	0	NP_060289.2
4503509	eukaryotic translation initiation factor 3 subunit A [Homo sapiens]	EIF3A	-0.510457	0.7	3	0	0	XP_003120717.1
33188445	microtubule-actin cross-linking factor 1 isoform a [Homo sapiens]	MACF1	-0.510457	0.7	11	0	0	NP_001078936.1
4503513	eukaryotic translation initiation factor 3 subunit I [Homo sapiens]	EIF3I	-0.508403	0.7	0	0	0	NP_001335.1
33356163	eukaryotic translation initiation factor 1A, Y-chromosomal [Homo sapiens]	EIF1AY	-0.508403	0.7	0	0	0	NP_064573.1
281182700	WASH complex subunit FAM21C isoform 3 [Homo sapiens]	FAM21C	-0.508403	0.7	0	0	0	NP_057588.1
285002231	glycerol-3-phosphate dehydrogenase, mitochondrial precursor [Homo sapiens]	GPD2	-0.508403	0.7	0	5	1	NP_003339.1
4758442	glia maturation factor beta [Homo sapiens]	GMFB	-0.506353	0.7	1	4	0	NP_005008.2
149999378	inverted formin-2 isoform 2 [Homo sapiens]	INF2	-0.504305	0.71	2	0	0	NP_064543.3
164519138	endothelin-converting enzyme 1 isoform 4 [Homo sapiens]	ECE1	-0.504305	0.71	0	1	0	NP_004850.1
63055057	beta-actin-like protein 2 [Homo sapiens]	ACTBL2	-0.50226	0.71	0	0	0	NP_003818.2
4503521	eukaryotic translation initiation factor 3 subunit E [Homo sapiens]	EIF3E	-0.50226	0.71	1	0	0	NP_001007026.1
5031741	dnaJ homolog subfamily A member 2 [Homo sapiens]	DNAJA2	-0.50226	0.71	1	0	0	NP_001124195.1
52856421	chromatin complexes subunit BAP18 isoform 2 [Homo sapiens]	C17orf49	-0.500218	0.71	0	0	0	NP_219484.1
16753207	ubiquilin-2 [Homo sapiens]	UBQLN2	-0.500218	0.71	1	0	0	NP_004095.4
225543288	SUMO-activating enzyme subunit 1 isoform c [Homo sapiens]	SAE1	-0.500218	0.71	2	0	0	NP_006349.1
7019485	programmed cell death protein 6 [Homo sapiens]	PDCD6	-0.498179	0.71	0	0	0	NP_005490.1
118766350	calcium-binding protein 39-like [Homo sapiens]	CAB39L	-0.498179	0.71	0	0	0	NP_004229.1
27262651	ataxin-2-like protein isoform D [Homo sapiens]	ATXN2L	-0.496142	0.71	3	0	0	NP_060832.1
112363070	hsp70-binding protein 1 [Homo sapiens]	HSPBP1	-0.496142	0.71	0	1	0	NP_714941.1
307548863	dihydrofolate reductase-like protein 1 [Homo sapiens]	DHFRL1	-0.494109	0.71	0	0	0	NP_064716.2
4503743	protein flightless-1 homolog [Homo sapiens]	FLII	-0.494109	0.71	1	0	0	NP_004740.2
11863154	coatomer subunit delta isoform 1 [Homo sapiens]	ARCN1	-0.494109	0.71	1	1	0	NP_000025.1
151301219	protein arginine N-methyltransferase 1 isoform 3 [Homo sapiens]	PRMT1	-0.494109	0.71	1	0	0	NP_005309.1
226246618	transforming acidic coiled-coil-containing protein 1 isoform 3 [Homo sapiens]	TACC1	-0.494109	0.71	1	1	0	NP_055070.1
34098946	nuclease-sensitive element-binding protein 1 [Homo sapiens]	YBX1	-0.492079	0.71	0	0	0	NP_057406.2
201860300	AH receptor-interacting protein [Homo sapiens]	AIP	-0.492079	0.71	0	0	0	NP_002706.1
224586884	DNA-binding protein A isoform b [Homo sapiens]	CSDA	-0.488026	0.71	0	0	0	NP_478126.1
38327039	heat shock 70 kDa protein 4 [Homo sapiens]	HSPA4	-0.488026	0.71	2	0	0	NP_112588.1
156766050	protein AHNAK2 [Homo sapiens]	AHNAK2	-0.488026	0.71	7	0	0	NP_079495.1
21361794	cullin-associated NEDD8-dissociated protein 1 [Homo sapiens]	CAND1	-0.486004	0.71	2	0	0	NP_004138.1
34147637	COP9 signalosome complex subunit 6 [Homo sapiens]	COPS6	-0.486004	0.71	1	0	0	NP_001186911.1
12408677	prefoldin subunit 4 [Homo sapiens]	PFDN4	-0.483985	0.72	0	0	0	NP_001036059.1
21361144	26S protease regulatory subunit 6A [Homo sapiens]	PSMC3	-0.483985	0.72	0	0	0	NP_009120.1
212276104	leucine-rich repeat flightless-interacting protein 1 isoform 5 [Homo sapiens]	LRRFIP1	-0.483985	0.72	0	1	0	NP_055701.1
4507947	tyrosyl-tRNA synthetase, cytoplasmic [Homo sapiens]	YARS	-0.479955	0.72	0	0	0	NP_006414.2
23308579	prostaglandin E synthase 3 [Homo sapiens]	PTGES3	-0.479955	0.72	0	2	0	NP_000149.3
302699239	eukaryotic translation initiation factor 4 gamma 1 isoform 4 [Homo sapiens]	EIF4G1	-0.479955	0.72	3	0	0	NP_116136.1
124028525	phenylalanyl-tRNA synthetase beta chain [Homo sapiens]	FARSB	-0.477944	0.72	0	0	0	NP_001073867.1
33359694	ubiquitin-conjugating enzyme E2 E3 [Homo sapiens]	UBE2E3	-0.477944	0.72	1	0	0	NP_000062.1
5174529	S-adenosylmethionine synthase isoform type-2 [Homo sapiens]	MAT2A	-0.475936	0.72	2	0	0	NP_006507.2
4501887	actin, cytoplasmic 2 [Homo sapiens]	ACTG1	-0.473931	0.72	0	2	1	NP_002119.1
22538465	proteasome subunit beta type-3 [Homo sapiens]	PSMB3	-0.473931	0.72	0	0	0	NP_004511.2
15011936	40S ribosomal protein S26 [Homo sapiens]	RPS26	-0.471929	0.72	0	0	0	NP_002130.2
255958306	perilipin-3 isoform 3 [Homo sapiens]	PLIN3	-0.471929	0.72	0	0	0	NP_060140.2
20149635	NSFL1 cofactor p47 isoform a [Homo sapiens]	NSFL1C	-0.471929	0.72	0	1	0	NP_077305.2
197276600	microtubule-associated protein 4 isoform 4 [Homo sapiens]	MAP4	-0.471929	0.72	0	1	0	NP_001887.1
269847750	hypothetical protein LOC84319 isoform 2 [Homo sapiens]	C3orf26	-0.471929	0.72	2	1	0	NP_787116.2
8922498	pyridoxine-5'-phosphate oxidase [Homo sapiens]	PNPO	-0.469929	0.72	0	0	0	NP_004276.2
4758092	di-N-acetylchitobiase precursor [Homo sapiens]	CTBS	-0.467932	0.72	0	0	0	NP_003748.1
14249678	splicing factor 45 [Homo sapiens]	RBM17	-0.467932	0.72	0	0	0	NP_065761.1
4507651	tropomyosin alpha-4 chain isoform 2 [Homo sapiens]	TPM4	-0.467932	0.72	2	1	0	NP_001006942.1
7705813	60S ribosomal protein L26-like 1 [Homo sapiens]	RPL26L1	-0.463947	0.73	0	0	0	NP_006627.2
40068518	6-phosphogluconate dehydrogenase, decarboxylating [Homo sapiens]	PGD	-0.463947	0.73	3	1	1	NP_444278.1
259013532	transmembrane protein 41B isoform 2 [Homo sapiens]	TMEM41B	-0.461959	0.73	0	0	0	NP_001158255.1
4503729	peptidyl-prolyl cis-trans isomerase FKBP4 [Homo sapiens]	FKBP4	-0.459973	0.73	2	0	0	NP_002563.1
25777612	26S proteasome non-ATPase regulatory subunit 3 [Homo sapiens]	PSMD3	-0.45799	0.73	0	0	0	NP_009145.1
205277463	transketolase [Homo sapiens]	TKT	-0.45799	0.73	0	0	0	NP_001036015.1
6005757	FACT complex subunit SPT16 [Homo sapiens]	SUPT16H	-0.45799	0.73	4	0	0	NP_001952.1
13540582	Williams-Beuren syndrome chromosomal region 16 protein [Homo sapiens]	WBSCR16	-0.45799	0.73	1	0	0	NP_060284.1
48762920	6-phosphofructokinase, liver type [Homo sapiens]	PFKL	-0.45799	0.73	1	0	0	NP_002957.1
84043963	eukaryotic translation initiation factor 5B [Homo sapiens]	EIF5B	-0.45799	0.73	3	1	0	NP_002379.2
4506587	replication protein A 14 kDa subunit [Homo sapiens]	RPA3	-0.456009	0.73	0	0	0	NP_003850.1
63252910	DDB1- and CUL4-associated factor 6 isoform b [Homo sapiens]	DCAF6	-0.456009	0.73	0	0	0	NP_003293.2
19923483	ras-related protein Rab-14 [Homo sapiens]	RAB14	-0.456009	0.73	0	2	1	NP_005830.2
4503659	ubiquitin-like protein fubi and ribosomal protein S30 precursor [Homo sapiens]	FAU	-0.456009	0.73	1	0	0	NP_001158503.1
4504511	dnaJ homolog subfamily A member 1 [Homo sapiens]	DNAJA1	-0.456009	0.73	2	0	0	NP_003280.2
110227866	SUN domain-containing protein 1 isoform b [Homo sapiens]	SUN1	-0.456009	0.73	0	1	0	NP_004699.1
119220605	ubiquitin carboxyl-terminal hydrolase 10 [Homo sapiens]	USP10	-0.456009	0.73	1	0	0	NP_001655.1
216548445	N(2),N(2)-dimethylguanosine tRNA methyltransferase isoform 2 [Homo sapiens]	TRMT1	-0.454032	0.73	0	0	0	NP_057023.2
17136148	V-type proton ATPase subunit S1 precursor [Homo sapiens]	ATP6AP1	-0.454032	0.73	0	1	0	NP_002865.1
300388183	26S proteasome non-ATPase regulatory subunit 1 isoform 2 [Homo sapiens]	PSMD1	-0.454032	0.73	3	0	0	NP_076931.1
38027914	COP9 signalosome complex subunit 8 isoform 2 [Homo sapiens]	COPS8	-0.452057	0.73	0	0	0	NP_003080.2
73808090	zinc finger protein 207 isoform b [Homo sapiens]	ZNF207	-0.452057	0.73	0	0	0	NP_054892.2
4503475	elongation factor 1-alpha 2 [Homo sapiens]	EEF1A2	-0.452057	0.73	0	1	0	NP_001129490.1
4506133	phosphoribosyl pyrophosphate synthase-associated protein 2 [Homo sapiens]	PRPSAP2	-0.448115	0.73	0	0	0	NP_003083.1
94536836	2-oxoglutarate and iron-dependent oxygenase domain-containing protein 1 [Homo sapiens]	OGFOD1	-0.448115	0.73	0	0	0	NP_066362.2
312433975	eukaryotic translation initiation factor 3 subunit C [Homo sapiens]	EIF3C	-0.448115	0.73	0	0	0	NP_003827.3
11056036	tubulin--tyrosine ligase-like protein 12 [Homo sapiens]	TTLL12	-0.448115	0.73	1	0	0	NP_055816.2
188497756	ubiquitin-associated protein 2-like isoform b [Homo sapiens]	UBAP2L	-0.448115	0.73	1	0	0	NP_001130046.1
190684675	DNA repair protein XRCC1 [Homo sapiens]	XRCC1	-0.446148	0.73	0	0	0	NP_061895.3
7656952	calcyclin-binding protein isoform 1 [Homo sapiens]	CACYBP	-0.446148	0.73	1	1	0	NP_055205.2
4501881	actin, alpha skeletal muscle [Homo sapiens]	ACTA1	-0.444184	0.74	0	0	0	NP_000503.1
4507353	TATA-binding protein-associated factor 2N isoform 2 [Homo sapiens]	TAF15	-0.442222	0.74	0	0	0	NP_006406.1
5803181	stress-induced-phosphoprotein 1 [Homo sapiens]	STIP1	-0.442222	0.74	0	0	0	NP_203693.3
20149675	EF-hand domain-containing protein D2 [Homo sapiens]	EFHD2	-0.442222	0.74	0	0	0	NP_150644.1
148612877	kinesin-like protein KIF2A isoform 1 [Homo sapiens]	KIF2A	-0.442222	0.74	1	0	0	NP_004559.4
24430137	L antigen family member 3 [Homo sapiens]	LAGE3	-0.440263	0.74	0	2	0	NP_002902.2
50980301	myosin phosphatase Rho-interacting protein isoform 2 [Homo sapiens]	MPRIP	-0.440263	0.74	3	0	0	NP_008879.3
154146191	heat shock protein HSP 90-alpha isoform 2 [Homo sapiens]	HSP90AA1	-0.440263	0.74	1	0	0	NP_783859.1
4502209	ADP-ribosylation factor 5 [Homo sapiens]	ARF5	-0.438307	0.74	0	1	0	NP_065799.1
74027251	E3 ubiquitin-protein ligase TRIM33 isoform beta [Homo sapiens]	TRIM33	-0.438307	0.74	2	1	0	NP_009294.1
217272851	prolyl 4-hydroxylase subunit alpha-1 isoform 3 precursor [Homo sapiens]	P4HA1	-0.438307	0.74	2	1	0	NP_004854.1
224177511	sorting nexin-18 isoform c [Homo sapiens]	SNX18	-0.438307	0.74	0	1	0	NP_002757.2
42741675	PDZ and LIM domain protein 7 isoform 2 [Homo sapiens]	PDLIM7	-0.436354	0.74	0	0	0	NP_003147.2
187608750	cellular nucleic acid-binding protein isoform 6 [Homo sapiens]	CNBP	-0.436354	0.74	0	0	0	NP_001514.2
19923236	nuclear autoantigen Sp-100 isoform 2 [Homo sapiens]	SP100	-0.436354	0.74	3	0	0	NP_060831.2
11968182	40S ribosomal protein S18 [Homo sapiens]	RPS18	-0.434403	0.74	0	0	0	NP_055121.1
15718687	40S ribosomal protein S3 [Homo sapiens]	RPS3	-0.434403	0.74	0	0	0	NP_004994.1
28460688	alpha-taxilin [Homo sapiens]	TXLNA	-0.434403	0.74	0	0	0	NP_942135.1
42741682	zinc finger Ran-binding domain-containing protein 2 isoform 2 [Homo sapiens]	ZRANB2	-0.434403	0.74	1	1	0	NP_064528.1
62460637	importin-4 [Homo sapiens]	IPO4	-0.432455	0.74	0	0	0	NP_115963.1
4758032	coatomer subunit beta' [Homo sapiens]	COPB2	-0.432455	0.74	2	0	0	NP_149131.1
4506679	40S ribosomal protein S10 [Homo sapiens]	RPS10	-0.430509	0.74	0	0	0	NP_004519.1
115430223	galectin-3 isoform 1 [Homo sapiens]	LGALS3	-0.430509	0.74	0	0	0	NP_001186782.1
226371618	signal recognition particle 54 kDa protein isoform 2 [Homo sapiens]	SRP54	-0.430509	0.74	0	0	0	NP_006815.2
13194195	chloride channel CLIC-like protein 1 isoform 2 [Homo sapiens]	CLCC1	-0.430509	0.74	2	0	0	NP_291035.1
29789090	protein RCC2 [Homo sapiens]	RCC2	-0.430509	0.74	0	1	0	NP_002284.3
4506701	40S ribosomal protein S23 [Homo sapiens]	RPS23	-0.428566	0.74	0	0	0	NP_057063.2
6005860	60S ribosomal protein L35 [Homo sapiens]	RPL35	-0.428566	0.74	0	0	0	NP_056342.3
7657198	probable dimethyladenosine transferase [Homo sapiens]	DIMT1L	-0.428566	0.74	0	0	0	NP_001017928.1
5032051	40S ribosomal protein S14 [Homo sapiens]	RPS14	-0.426625	0.74	0	0	0	NP_057376.2
7661914	26S proteasome non-ATPase regulatory subunit 6 [Homo sapiens]	PSMD6	-0.426625	0.74	0	0	0	NP_109587.1
7706441	vacuolar protein sorting-associated protein 29 isoform 1 [Homo sapiens]	VPS29	-0.426625	0.74	0	0	0	NP_001182461.1
22907044	DNA dC-_dU-editing enzyme APOBEC-3F isoform a [Homo sapiens]	APOBEC3F	-0.426625	0.74	0	0	0	NP_006825.1
4503471	elongation factor 1-alpha 1 [Homo sapiens]	EEF1A1	-0.424688	0.75	0	2	0	NP_004915.2
4506697	40S ribosomal protein S20 isoform 2 [Homo sapiens]	RPS20	-0.424688	0.75	0	1	0	NP_005718.2
5032169	telomeric repeat-binding factor 2 [Homo sapiens]	TERF2	-0.424688	0.75	2	1	0	NP_009031.1
5803187	transaldolase [Homo sapiens]	TALDO1	-0.422752	0.75	0	0	0	NP_056271.2
38202214	protein transport protein Sec23A [Homo sapiens]	SEC23A	-0.422752	0.75	2	0	0	NP_660309.1
56243590	WD repeat-containing protein 33 isoform 1 [Homo sapiens]	WDR33	-0.422752	0.75	1	1	0	NP_000173.2
38027923	COP9 signalosome complex subunit 5 [Homo sapiens]	COPS5	-0.42082	0.75	0	0	0	NP_055640.2
27881506	ATP-binding cassette sub-family F member 2 isoform a [Homo sapiens]	ABCF2	-0.42082	0.75	2	0	0	NP_002936.1
56550081	mitotic checkpoint protein BUB3 isoform b [Homo sapiens]	BUB3	-0.42082	0.75	1	0	0	NP_115727.3
5454106	transcription initiation factor TFIID subunit 10 [Homo sapiens]	TAF10	-0.41889	0.75	0	0	0	NP_055885.3
189458812	1,4-alpha-glucan-branching enzyme [Homo sapiens]	GBE1	-0.41889	0.75	4	0	0	NP_055866.1
21389357	MAPK-interacting and spindle-stabilizing protein-like [Homo sapiens]	MAPK1IP1L	-0.416962	0.75	0	0	0	NP_056277.2
221219056	dnaJ homolog subfamily C member 7 isoform 2 [Homo sapiens]	DNAJC7	-0.416962	0.75	1	0	0	NP_002938.1
256000749	putative pre-mRNA-splicing factor ATP-dependent RNA helicase DHX16 isoform 2 [Homo sapiens]	DHX16	-0.416962	0.75	2	0	0	NP_004448.2
70995211	delta(3,5)-Delta(2,4)-dienoyl-CoA isomerase, mitochondrial precursor [Homo sapiens]	ECH1	-0.415037	0.75	0	0	0	NP_004387.1
208431836	polyadenylate-binding protein 4 isoform 3 [Homo sapiens]	PABPC4	-0.415037	0.75	0	0	0	NP_001156758.1
5032179	transcription intermediary factor 1-beta [Homo sapiens]	TRIM28	-0.415037	0.75	1	0	0	NP_005906.2
59859885	40S ribosomal protein SA [Homo sapiens]	RPSA	-0.415037	0.75	2	0	0	NP_115758.3
108773810	leucyl-tRNA synthetase, cytoplasmic [Homo sapiens]	LARS	-0.415037	0.75	2	0	0	NP_004574.2
4506209	26S protease regulatory subunit 7 1 [Homo sapiens]	PSMC2	-0.413115	0.75	0	0	0	NP_001171835.1
4506619	60S ribosomal protein L24 [Homo sapiens]	RPL24	-0.413115	0.75	1	0	0	NP_005165.1
7661952	squamous cell carcinoma antigen recognized by T-cells 3 [Homo sapiens]	SART3	-0.413115	0.75	2	1	0	NP_004757.1
284807150	glucosylceramidase isoform 2 [Homo sapiens]	GBA	-0.413115	0.75	1	1	0	NP_055317.1
5902054	E3 ubiquitin-protein ligase RNF5 [Homo sapiens]	RNF5	-0.411195	0.75	0	0	0	NP_079120.1
223890243	60S ribosomal protein L10 [Homo sapiens]	RPL10	-0.411195	0.75	0	0	0	NP_001021.1
23110944	proteasome subunit alpha type-6 [Homo sapiens]	PSMA6	-0.411195	0.75	1	0	0	NP_000217.2
39995082	tRNA (cytosine-5-)-methyltransferase NSUN2 isoform 1 [Homo sapiens]	NSUN2	-0.411195	0.75	2	0	0	NP_001186071.1
221316630	coatomer subunit beta [Homo sapiens]	COPB1	-0.411195	0.75	1	1	0	NP_001186092.1
4506221	26S proteasome non-ATPase regulatory subunit 12 isoform 1 [Homo sapiens]	PSMD12	-0.409278	0.75	0	0	0	NP_003741.1
21361517	UBX domain-containing protein 1 [Homo sapiens]	UBXN1	-0.409278	0.75	0	0	0	NP_001116429.1
25777713	S-phase kinase-associated protein 1 isoform b [Homo sapiens]	SKP1	-0.409278	0.75	0	4	1	NP_982281.1
109148542	alanyl-tRNA synthetase, cytoplasmic [Homo sapiens]	AARS	-0.409278	0.75	1	2	1	NP_524558.1
5901922	hsp90 co-chaperone Cdc37 [Homo sapiens]	CDC37	-0.409278	0.75	2	0	0	NP_000150.1
4506195	proteasome subunit beta type-2 isoform 1 [Homo sapiens]	PSMB2	-0.407364	0.75	0	0	0	NP_055426.1
310114531	PREDICTED: non-histone chromosomal protein HMG-17-like [Homo sapiens]	LOC100508943	-0.407364	0.75	0	0	0	NP_001177162.1
46367787	polyadenylate-binding protein 1 [Homo sapiens]	PABPC1	-0.405451	0.76	0	0	0	NP_006223.2
5292161	26S proteasome non-ATPase regulatory subunit 4 [Homo sapiens]	PSMD4	-0.405451	0.76	0	1	0	NP_009143.1
150417989	cyclin-K [Homo sapiens]	CCNK	-0.405451	0.76	1	0	0	NP_004429.1
261278346	cell growth regulator with EF hand domain protein 1 isoform a [Homo sapiens]	CGREF1	-0.403542	0.76	0	0	0	NP_940953.2
7705696	thioredoxin domain-containing protein 12 precursor [Homo sapiens]	TXNDC12	-0.403542	0.76	1	1	0	NP_001013.1
4506707	40S ribosomal protein S25 [Homo sapiens]	RPS25	-0.401635	0.76	0	0	0	NP_004990.3
4506715	40S ribosomal protein S28 [Homo sapiens]	RPS28	-0.401635	0.76	0	0	0	NP_001188493.1
30061567	la-related protein 1B isoform 1 [Homo sapiens]	LARP1B	-0.401635	0.76	2	0	0	NP_002799.3
38505218	acyl-CoA dehydrogenase family member 11 [Homo sapiens]	ACAD11	-0.401635	0.76	4	0	0	NP_060221.2
186972143	tripeptidyl-peptidase 2 [Homo sapiens]	TPP2	-0.401635	0.76	3	0	0	NP_057733.2
82880645	ubiquitin carboxyl-terminal hydrolase 14 isoform b [Homo sapiens]	USP14	-0.39973	0.76	1	1	0	NP_005717.3
4506181	proteasome subunit alpha type-2 [Homo sapiens]	PSMA2	-0.397828	0.76	0	0	0	NP_950245.2
4506651	60S ribosomal protein L36a-like [Homo sapiens]	RPL36AL	-0.397828	0.76	0	0	0	NP_000983.1
5174447	guanine nucleotide-binding protein subunit beta-2-like 1 [Homo sapiens]	GNB2L1	-0.397828	0.76	0	0	0	NP_061849.2
18379332	WW domain-containing adapter protein with coiled-coil isoform 3 [Homo sapiens]	WAC	-0.397828	0.76	0	0	0	NP_001185986.1
17149828	N-alpha-acetyltransferase 15, NatA auxiliary subunit [Homo sapiens]	NAA15	-0.397828	0.76	0	3	0	NP_001012321.1
27765085	calpastatin isoform b [Homo sapiens]	CAST	-0.397828	0.76	1	1	0	NP_542408.1
42544159	heat shock protein 105 kDa [Homo sapiens]	HSPH1	-0.397828	0.76	1	0	0	NP_005849.1
54607086	selenocysteine-specific elongation factor [Homo sapiens]	EEFSEC	-0.397828	0.76	1	0	0	NP_001135746.1
10835057	N-alpha-acetyltransferase 10, NatA catalytic subunit [Homo sapiens]	NAA10	-0.395929	0.76	0	0	0	NP_001026997.1
42718020	retinitis pigmentosa 9 protein [Homo sapiens]	RP9	-0.395929	0.76	0	0	0	NP_001191006.1
145309326	laminin subunit gamma-1 precursor [Homo sapiens]	LAMC1	-0.395929	0.76	0	0	0	NP_853553.1
312596881	26S protease regulatory subunit 8 isoform 2 [Homo sapiens]	PSMC5	-0.395929	0.76	0	0	0	NP_056391.1
32967280	ubiquitin-conjugating enzyme E2 A isoform 1 [Homo sapiens]	UBE2A	-0.394032	0.76	0	0	0	NP_852616.1
151301053	RNA-binding protein 33 [Homo sapiens]	RBM33	-0.394032	0.76	0	0	0	NP_003560.2
4885649	SUMO-activating enzyme subunit 2 [Homo sapiens]	UBA2	-0.394032	0.76	2	0	0	NP_000678.1
5803225	14-3-3 protein epsilon [Homo sapiens]	YWHAE	-0.394032	0.76	2	2	0	NP_570721.1
4503535	eukaryotic translation initiation factor 4E isoform 1 [Homo sapiens]	EIF4E	-0.392137	0.76	0	0	0	NP_001162582.1
4758762	asparaginyl-tRNA synthetase, cytoplasmic [Homo sapiens]	NARS	-0.392137	0.76	0	0	0	NP_004085.1
5453599	F-actin-capping protein subunit alpha-2 [Homo sapiens]	CAPZA2	-0.392137	0.76	0	0	0	NP_006322.4
119874201	protein furry homolog-like [Homo sapiens]	FRYL	-0.392137	0.76	9	1	0	NP_006592.3
14277700	40S ribosomal protein S12 [Homo sapiens]	RPS12	-0.390245	0.76	0	0	0	NP_055781.2
94721239	isoleucyl-tRNA synthetase, cytoplasmic [Homo sapiens]	IARS	-0.390245	0.76	3	0	0	NP_036335.1
20070228	nucleobindin-1 precursor [Homo sapiens]	NUCB1	-0.388355	0.76	2	1	0	NP_001128496.1
15055539	40S ribosomal protein S2 [Homo sapiens]	RPS2	-0.386468	0.77	0	0	0	NP_002875.1
4758898	peroxisomal biogenesis factor 16 isoform 1 [Homo sapiens]	PEX16	-0.386468	0.77	1	0	0	NP_001076581.2
4506179	proteasome subunit alpha type-1 isoform 2 [Homo sapiens]	PSMA1	-0.384584	0.77	0	0	0	NP_055109.1
20149594	heat shock protein HSP 90-beta [Homo sapiens]	HSP90AB1	-0.384584	0.77	0	0	0	NP_778236.2
24430151	26S protease regulatory subunit 4 [Homo sapiens]	PSMC1	-0.384584	0.77	0	0	0	NP_060362.3
47717125	intersectin-1 isoform ITSN-s [Homo sapiens]	ITSN1	-0.384584	0.77	0	0	0	NP_570967.1
78000186	60S ribosomal protein L17 isoform a [Homo sapiens]	RPL17	-0.384584	0.77	0	0	0	NP_060654.1
301069365	28S ribosomal protein S18a, mitochondrial isoform 2 precursor [Homo sapiens]	MRPS18A	-0.384584	0.77	0	0	0	NP_060017.1
291084635	60 kDa SS-A/Ro ribonucleoprotein isoform 4 [Homo sapiens]	TROVE2	-0.384584	0.77	1	0	0	NP_056240.2
58761484	T-complex protein 1 subunit gamma isoform c [Homo sapiens]	CCT3	-0.382702	0.77	0	0	0	NP_001226.2
116812577	putative RNA-binding protein Luc7-like 2 [Homo sapiens]	LUC7L2	-0.382702	0.77	0	0	0	NP_006635.2
167466173	heat shock 70 kDa protein 1A/1B [Homo sapiens]	HSPA1B	-0.382702	0.77	0	0	0	NP_001260.1
13124873	core-binding factor subunit beta isoform 2 [Homo sapiens]	CBFB	-0.382702	0.77	1	4	0	NP_065795.1
5579478	dual specificity mitogen-activated protein kinase kinase 1 [Homo sapiens]	MAP2K1	-0.380822	0.77	0	0	0	NP_002705.2
7705477	tRNA methyltransferase 112 homolog [Homo sapiens]	TRMT112	-0.380822	0.77	0	0	0	NP_005827.1
52627149	telomeric repeat-binding factor 2-interacting protein 1 [Homo sapiens]	TERF2IP	-0.380822	0.77	0	0	0	NP_001107000.1
110556636	182 kDa tankyrase-1-binding protein [Homo sapiens]	TNKS1BP1	-0.380822	0.77	0	0	0	NP_004709.2
62241042	bifunctional aminoacyl-tRNA synthetase [Homo sapiens]	EPRS	-0.380822	0.77	5	0	0	NP_001093163.1
40805825	coatomer subunit epsilon isoform b [Homo sapiens]	COPE	-0.378944	0.77	0	0	0	NP_006773.2
89886477	striatin-4 isoform 1 [Homo sapiens]	STRN4	-0.378944	0.77	0	0	0	NP_003760.1
261399877	T-complex protein 1 subunit eta isoform d [Homo sapiens]	CCT7	-0.378944	0.77	0	1	0	NP_003086.1
5031931	nascent polypeptide-associated complex subunit alpha isoform b [Homo sapiens]	NACA	-0.37707	0.77	0	0	0	NP_001008491.1
5453690	dnaJ homolog subfamily B member 1 [Homo sapiens]	DNAJB1	-0.37707	0.77	0	0	0	XP_003119502.1
13129094	ashwin [Homo sapiens]	C2orf49	-0.37707	0.77	0	0	0	NP_006391.1
19923969	coiled-coil domain-containing protein 124 [Homo sapiens]	CCDC124	-0.37707	0.77	0	0	0	NP_006026.3
4759270	translin [Homo sapiens]	TSN	-0.37707	0.77	1	0	0	NP_003814.1
58082085	peptidase M20 domain-containing protein 2 [Homo sapiens]	PM20D2	-0.37707	0.77	2	0	0	NP_006404.1
110227603	bifunctional coenzyme A synthase isoform a [Homo sapiens]	COASY	-0.37707	0.77	0	1	0	NP_005753.1
4506189	proteasome subunit alpha type-7 [Homo sapiens]	PSMA7	-0.375197	0.77	0	0	0	NP_000970.1
193083197	ubiquitin-like domain-containing CTD phosphatase 1 [Homo sapiens]	UBLCP1	-0.375197	0.77	0	0	0	NP_919223.1
17402900	far upstream element-binding protein 1 [Homo sapiens]	FUBP1	-0.375197	0.77	4	0	0	NP_570981.1
157739942	gem-associated protein 5 [Homo sapiens]	GEMIN5	-0.375197	0.77	1	1	0	NP_001002926.1
4504035	GMP synthase [glutamine-hydrolyzing] [Homo sapiens]	GMPS	-0.373327	0.77	0	0	0	NP_004636.1
38505222	protein disulfide-isomerase TMX3 precursor [Homo sapiens]	TMX3	-0.373327	0.77	0	0	0	NP_057055.2
5453704	PRA1 family protein 3 [Homo sapiens]	ARL6IP5	-0.373327	0.77	1	2	1	NP_004672.2
4505939	DNA-directed RNA polymerase II subunit RPB1 [Homo sapiens]	POLR2A	-0.373327	0.77	2	0	0	NP_037519.2
22748937	exportin-5 [Homo sapiens]	XPO5	-0.373327	0.77	2	0	0	NP_001129602.1
42716280	vigilin [Homo sapiens]	HDLBP	-0.373327	0.77	3	1	0	NP_005004.1
156631005	26S proteasome non-ATPase regulatory subunit 8 [Homo sapiens]	PSMD8	-0.373327	0.77	1	0	0	NP_001158890.1
164664518	probable ATP-dependent RNA helicase DDX6 [Homo sapiens]	DDX6	-0.373327	0.77	1	2	0	NP_003115.1
45439306	aspartyl-tRNA synthetase, cytoplasmic [Homo sapiens]	DARS	-0.37146	0.77	0	0	0	NP_061329.3
209915588	60S ribosomal protein L28 isoform 5 [Homo sapiens]	RPL28	-0.369595	0.77	0	0	0	NP_001035758.1
4758756	nucleosome assembly protein 1-like 1 [Homo sapiens]	NAP1L1	-0.369595	0.77	1	2	1	NP_624311.1
20336205	transcriptional regulator ATRX isoform 2 [Homo sapiens]	ATRX	-0.369595	0.77	4	2	0	NP_071935.1
4506609	60S ribosomal protein L19 [Homo sapiens]	RPL19	-0.367732	0.78	0	0	0	NP_150093.1
4557515	DNA damage-binding protein 2 [Homo sapiens]	DDB2	-0.367732	0.78	0	0	0	NP_000933.1
64276486	peptidyl-prolyl cis-trans isomerase CWC27 homolog [Homo sapiens]	CWC27	-0.367732	0.78	0	0	0	NP_005947.3
310118530	PREDICTED: putative PRAME family member 25 isoform 2, partial [Homo sapiens]	PRAMEF25	-0.365871	0.78	0	0	0	NP_003396.1
4507791	NEDD8-conjugating enzyme Ubc12 [Homo sapiens]	UBE2M	-0.365871	0.78	1	0	0	NP_065987.1
17999541	vacuolar protein sorting-associated protein 35 [Homo sapiens]	VPS35	-0.365871	0.78	1	0	0	NP_057455.1
38202255	threonyl-tRNA synthetase, cytoplasmic [Homo sapiens]	TARS	-0.365871	0.78	1	1	0	NP_003869.1
46909584	cAMP-dependent protein kinase catalytic subunit alpha isoform 2 [Homo sapiens]	PRKACA	-0.365871	0.78	1	0	0	NP_002285.1
61676188	E3 ubiquitin-protein ligase HUWE1 [Homo sapiens]	HUWE1	-0.365871	0.78	2	0	0	NP_001171136.1
214830438	sequestosome-1 isoform 2 [Homo sapiens]	SQSTM1	-0.365871	0.78	2	0	0	NP_000517.2
15100175	1-acyl-sn-glycerol-3-phosphate acyltransferase alpha [Homo sapiens]	AGPAT1	-0.364013	0.78	0	0	0	NP_002843.2
22202637	prefoldin subunit 5 isoform gamma [Homo sapiens]	PFDN5	-0.364013	0.78	0	0	0	NP_149098.2
194688135	high mobility group protein B2 [Homo sapiens]	HMGB2	-0.364013	0.78	0	0	0	NP_062552.2
38327642	WD repeat-containing protein 55 [Homo sapiens]	WDR55	-0.364013	0.78	1	0	0	NP_004039.1
4506691	40S ribosomal protein S16 [Homo sapiens]	RPS16	-0.362158	0.78	0	0	0	NP_079105.4
22538467	proteasome subunit beta type-4 [Homo sapiens]	PSMB4	-0.362158	0.78	0	0	0	NP_065801.1
24497620	signal recognition particle 68 kDa protein [Homo sapiens]	SRP68	-0.362158	0.78	1	0	0	NP_057175.1
112382237	synemin isoform A [Homo sapiens]	SYNM	-0.362158	0.78	1	2	0	NP_067022.1
23110942	proteasome subunit alpha type-5 isoform 1 [Homo sapiens]	PSMA5	-0.358454	0.78	0	0	0	NP_115958.2
5032161	transcription elongation factor B polypeptide 1 [Homo sapiens]	TCEB1	-0.358454	0.78	1	0	0	NP_112570.2
148536853	coatomer subunit alpha isoform 2 [Homo sapiens]	COPA	-0.358454	0.78	4	0	0	NP_066284.2
4503507	eukaryotic translation initiation factor 2 subunit 3 [Homo sapiens]	EIF2S3	-0.356606	0.78	0	0	0	NP_006423.1
4506341	ATP-binding cassette sub-family D member 3 isoform a [Homo sapiens]	ABCD3	-0.356606	0.78	0	0	0	NP_006403.2
4506643	60S ribosomal protein L37a [Homo sapiens]	RPL37A	-0.356606	0.78	0	0	0	NP_004492.2
155030240	tRNA-nucleotidyltransferase 1, mitochondrial [Homo sapiens]	TRNT1	-0.356606	0.78	0	0	0	NP_065952.2
34577049	bullous pemphigoid antigen 1 isoform 1eA precursor [Homo sapiens]	DST	-0.356606	0.78	22	0	0	NP_060710.3
163792194	TRM1-like protein isoform 1 [Homo sapiens]	TRMT1L	-0.356606	0.78	3	0	0	NP_001000.2
4758332	long-chain-fatty-acid--CoA ligase 4 isoform 1 [Homo sapiens]	ACSL4	-0.354759	0.78	0	1	1	NP_001009931.1
4826659	F-actin-capping protein subunit beta [Homo sapiens]	CAPZB	-0.354759	0.78	0	1	1	NP_663723.1
4504483	hypoxanthine-guanine phosphoribosyltransferase [Homo sapiens]	HPRT1	-0.354759	0.78	2	0	0	NP_066964.1
5453880	acidic leucine-rich nuclear phosphoprotein 32 family member A [Homo sapiens]	ANP32A	-0.354759	0.78	1	0	0	NP_001171659.1
20162550	protein phosphatase 1 regulatory subunit 14B [Homo sapiens]	PPP1R14B	-0.354759	0.78	1	0	0	NP_002622.2
6912478	importin subunit alpha-7 [Homo sapiens]	KPNA6	-0.352916	0.78	1	1	0	NP_004159.2
23510338	ubiquitin-like modifier-activating enzyme 1 [Homo sapiens]	UBA1	-0.352916	0.78	1	0	0	NP_116147.1
45827771	enhancer of mRNA-decapping protein 4 [Homo sapiens]	EDC4	-0.352916	0.78	1	0	0	NP_001035879.1
16306548	seryl-tRNA synthetase, cytoplasmic [Homo sapiens]	SARS	-0.351074	0.78	0	0	0	NP_002904.3
221219004	WD repeat-containing protein 74 [Homo sapiens]	WDR74	-0.351074	0.78	0	0	0	NP_003671.1
4503519	eukaryotic translation initiation factor 3 subunit F [Homo sapiens]	EIF3F	-0.349235	0.79	0	0	0	NP_115948.4
312922364	ubiquitin carboxyl-terminal hydrolase isozyme L5 isoform 4 [Homo sapiens]	UCHL5	-0.349235	0.79	0	0	0	NP_004266.2
4504505	peroxisomal multifunctional enzyme type 2 isoform 2 [Homo sapiens]	HSD17B4	-0.349235	0.79	4	0	0	NP_001018046.1
8922712	septin-11 [Homo sapiens]	2012-09-11	-0.349235	0.79	1	1	0	NP_663781.1
41281453	STE20-like serine/threonine-protein kinase [Homo sapiens]	SLK	-0.349235	0.79	2	0	0	NP_919307.1
54607053	translational activator GCN1 [Homo sapiens]	GCN1L1	-0.349235	0.79	3	0	0	NP_001922.2
195546902	transcription elongation factor SPT5 isoform b [Homo sapiens]	SUPT5H	-0.347399	0.79	1	0	0	NP_004466.2
23110939	proteasome subunit alpha type-3 isoform 2 [Homo sapiens]	PSMA3	-0.345564	0.79	0	0	0	NP_612455.1
56118219	insulin-like growth factor 2 mRNA-binding protein 2 isoform b [Homo sapiens]	IGF2BP2	-0.345564	0.79	0	0	0	NP_006074.2
58530842	desmoplakin isoform II [Homo sapiens]	DSP	-0.345564	0.79	0	0	0	NP_694880.1
83376130	elongation factor 1-beta [Homo sapiens]	EEF1B2	-0.345564	0.79	0	0	0	NP_076950.1
41281996	HEAT repeat-containing protein 3 [Homo sapiens]	HEATR3	-0.343732	0.79	1	0	0	NP_116235.2
14141193	40S ribosomal protein S9 [Homo sapiens]	RPS9	-0.341903	0.79	0	0	0	NP_996560.1
14165469	40S ribosomal protein S15a [Homo sapiens]	RPS15A	-0.341903	0.79	0	0	0	NP_060590.1
37693993	nucleoside diphosphate kinase 3 [Homo sapiens]	NME3	-0.341903	0.79	0	0	0	NP_057361.3
63252891	prolyl 4-hydroxylase subunit alpha-2 isoform 2 precursor [Homo sapiens]	P4HA2	-0.341903	0.79	0	0	0	NP_001420.2
93277122	RNA-binding protein 4 isoform 1 [Homo sapiens]	RBM4	-0.341903	0.79	0	0	0	NP_004772.1
5031815	lysyl-tRNA synthetase isoform 2 [Homo sapiens]	KARS	-0.341903	0.79	1	0	0	NP_064555.2
148727341	serine-threonine kinase receptor-associated protein [Homo sapiens]	STRAP	-0.341903	0.79	1	0	0	NP_003320.2
5454158	valyl-tRNA synthetase [Homo sapiens]	VARS	-0.340075	0.79	0	0	0	NP_777553.1
14916501	40S ribosomal protein S24 isoform a [Homo sapiens]	RPS24	-0.340075	0.79	0	0	0	NP_631908.1
4503841	X-ray repair cross-complementing protein 6 [Homo sapiens]	XRCC6	-0.340075	0.79	1	0	0	NP_001909.2
20357568	L-aminoadipate-semialdehyde dehydrogenase-phosphopantetheinyl transferase [Homo sapiens]	AASDHPPT	-0.340075	0.79	0	1	0	NP_116119.2
4506695	40S ribosomal protein S19 [Homo sapiens]	RPS19	-0.33825	0.79	0	0	0	NP_066565.1
29826282	protein phosphatase 1G [Homo sapiens]	PPM1G	-0.33825	0.79	0	0	0	NP_001011513.2
4506725	40S ribosomal protein S4, X isoform X isoform [Homo sapiens]	RPS4X	-0.33825	0.79	1	0	0	NP_005860.2
10864047	epidermal growth factor receptor substrate 15-like 1 [Homo sapiens]	EPS15L1	-0.33825	0.79	2	0	0	NP_001155178.1
17158044	40S ribosomal protein S6 [Homo sapiens]	RPS6	-0.33825	0.79	1	0	0	NP_066972.1
25470890	DAZ-associated protein 1 isoform a [Homo sapiens]	DAZAP1	-0.33825	0.79	1	0	0	NP_001014436.1
33413400	S-formylglutathione hydrolase [Homo sapiens]	ESD	-0.336428	0.79	0	0	0	NP_003361.1
38455427	T-complex protein 1 subunit delta [Homo sapiens]	CCT4	-0.336428	0.79	0	0	0	NP_689939.1
65787364	coronin-1B [Homo sapiens]	CORO1B	-0.336428	0.79	2	0	0	NP_068747.1
7656991	coronin-1C isoform 1 [Homo sapiens]	CORO1C	-0.334607	0.79	0	0	0	NP_004604.2
20143480	phosphatidate cytidylyltransferase 2 [Homo sapiens]	CDS2	-0.334607	0.79	0	0	0	NP_116584.2
71565154	alcohol dehydrogenase class-3 [Homo sapiens]	ADH5	-0.334607	0.79	0	0	0	NP_001158502.1
29789409	mimitin, mitochondrial [Homo sapiens]	NDUFAF2	-0.334607	0.79	1	0	0	NP_001123532.1
46249388	phosphoserine phosphatase [Homo sapiens]	PSPH	-0.334607	0.79	1	0	0	NP_004508.1
153251297	hypothetical protein LOC55319 [Homo sapiens]	C4orf43	-0.334607	0.79	0	1	0	NP_009144.1
4504425	high mobility group protein B1 [Homo sapiens]	HMGB1	-0.332789	0.79	0	0	0	NP_000421.1
4506193	proteasome subunit beta type-1 precursor [Homo sapiens]	PSMB1	-0.330973	0.8	0	0	0	NP_002958.2
153791632	eukaryotic translation initiation factor 5A-1-like [Homo sapiens]	EIF5AL1	-0.330973	0.8	0	0	0	NP_056171.2
4758896	peroxisomal membrane protein PEX14 [Homo sapiens]	PEX14	-0.330973	0.8	1	0	0	NP_005563.1
12025678	alpha-actinin-4 [Homo sapiens]	ACTN4	-0.330973	0.8	1	0	0	NP_055984.1
38372909	lysine-specific demethylase 3B [Homo sapiens]	KDM3B	-0.330973	0.8	3	1	0	NP_003744.1
4506743	40S ribosomal protein S8 [Homo sapiens]	RPS8	-0.32916	0.8	0	0	0	NP_055118.1
4507157	sortilin-related receptor preproprotein [Homo sapiens]	SORL1	-0.32916	0.8	0	0	0	NP_006817.1
21536378	bile salt export pump [Homo sapiens]	ABCB11	-0.32916	0.8	4	0	0	NP_036453.1
37577122	ubiquitin-conjugating enzyme E2 J1 [Homo sapiens]	UBE2J1	-0.32916	0.8	0	3	0	NP_001274.1
156766047	PERQ amino acid-rich with GYF domain-containing protein 2 isoform c [Homo sapiens]	GIGYF2	-0.32916	0.8	1	2	0	NP_001099040.1
10863895	thymosin beta-10 [Homo sapiens]	TMSB10	-0.327348	0.8	0	0	0	NP_054885.1
56699482	hypothetical protein LOC25940 [Homo sapiens]	FAM98A	-0.327348	0.8	0	0	0	NP_002807.1
260593665	xaa-Pro dipeptidase isoform 3 [Homo sapiens]	PEPD	-0.327348	0.8	0	0	0	NP_067026.3
4507241	FACT complex subunit SSRP1 [Homo sapiens]	SSRP1	-0.327348	0.8	2	0	0	NP_068809.1
5031597	actin-related protein 2/3 complex subunit 3 [Homo sapiens]	ARPC3	-0.327348	0.8	1	0	0	NP_055389.3
41322910	plectin isoform 1d [Homo sapiens]	PLEC	-0.327348	0.8	5	0	0	NP_001138736.1
124256496	heat shock 70 kDa protein 1-like [Homo sapiens]	HSPA1L	-0.327348	0.8	1	0	0	NP_009167.1
22035672	thioredoxin reductase 2, mitochondrial precursor [Homo sapiens]	TXNRD2	-0.325539	0.8	0	0	0	NP_057071.2
47271406	7SK snRNA methylphosphate capping enzyme isoform A [Homo sapiens]	MEPCE	-0.325539	0.8	0	0	0	NP_004586.2
51243032	oxysterol-binding protein-related protein 8 isoform b [Homo sapiens]	OSBPL8	-0.325539	0.8	2	0	0	NP_149020.2
5729877	heat shock cognate 71 kDa protein isoform 1 [Homo sapiens]	HSPA8	-0.323733	0.8	0	0	0	NP_005548.2
116805340	glycyl-tRNA synthetase [Homo sapiens]	GARS	-0.323733	0.8	1	0	0	NP_005902.1
169881252	general transcription factor II-I isoform 4 [Homo sapiens]	GTF2I	-0.323733	0.8	0	1	0	NP_006073.2
31742501	sorting nexin-27 [Homo sapiens]	SNX27	-0.321928	0.8	0	3	1	NP_061155.2
5453603	T-complex protein 1 subunit beta isoform 1 [Homo sapiens]	CCT2	-0.320126	0.8	0	0	0	NP_005994.2
12408654	galactosylgalactosylxylosylprotein 3-beta-glucuronosyltransferase 3 [Homo sapiens]	B3GAT3	-0.320126	0.8	0	0	0	NP_066299.2
15431293	60S ribosomal protein L15 [Homo sapiens]	RPL15	-0.320126	0.8	0	0	0	NP_001271.1
4505541	general vesicular transport factor p115 [Homo sapiens]	USO1	-0.320126	0.8	1	0	0	NP_001185808.1
109638749	signal recognition particle 72 kDa protein [Homo sapiens]	SRP72	-0.320126	0.8	2	1	0	NP_060997.2
115527097	serine/threonine-protein kinase MRCK beta [Homo sapiens]	CDC42BPB	-0.320126	0.8	1	0	0	NP_000963.1
154448890	THO complex subunit 1 [Homo sapiens]	THOC1	-0.320126	0.8	1	0	0	NP_003472.2
13994287	Krueppel-like factor 16 [Homo sapiens]	KLF16	-0.318326	0.8	0	0	0	NP_002609.1
23238222	COP9 signalosome complex subunit 3 isoform 1 [Homo sapiens]	COPS3	-0.318326	0.8	0	0	0	NP_998814.1
4502985	cytochrome c oxidase subunit 6B1 [Homo sapiens]	COX6B1	-0.316528	0.8	0	0	0	NP_872304.2
4506681	40S ribosomal protein S11 [Homo sapiens]	RPS11	-0.316528	0.8	0	0	0	NP_004992.2
47132600	DNA fragmentation factor subunit alpha isoform 2 [Homo sapiens]	DFFA	-0.316528	0.8	0	0	0	NP_055971.1
112821681	G protein-regulated inducer of neurite outgrowth 1 [Homo sapiens]	GPRIN1	-0.316528	0.8	0	0	0	NP_821070.1
25777602	26S proteasome non-ATPase regulatory subunit 2 [Homo sapiens]	PSMD2	-0.316528	0.8	2	0	0	NP_055399.1
29029559	exportin-2 [Homo sapiens]	CSE1L	-0.316528	0.8	3	0	0	NP_006582.1
38569423	ATP-citrate synthase isoform 2 [Homo sapiens]	ACLY	-0.316528	0.8	1	0	0	NP_777567.1
4503363	dolichol-phosphate mannosyltransferase [Homo sapiens]	DPM1	-0.314733	0.8	0	0	0	NP_006657.1
19923387	nuclear cap-binding protein subunit 2 isoform 1 [Homo sapiens]	NCBP2	-0.314733	0.8	0	0	0	NP_068744.1
8051636	exportin-T [Homo sapiens]	XPOT	-0.314733	0.8	1	1	0	NP_036473.2
19913371	F-box-like/WD repeat-containing protein TBL1XR1 [Homo sapiens]	TBL1XR1	-0.314733	0.8	0	1	0	NP_116219.2
297206874	peroxisomal acyl-coenzyme A oxidase 1 isoform c [Homo sapiens]	ACOX1	-0.314733	0.8	0	1	0	NP_940888.2
4758256	eukaryotic translation initiation factor 2 subunit 1 [Homo sapiens]	EIF2S1	-0.312939	0.81	0	0	0	NP_006734.1
153266822	aldehyde dehydrogenase family 1 member A3 [Homo sapiens]	ALDH1A3	-0.312939	0.81	0	0	0	NP_005792.1
4506185	proteasome subunit alpha type-4 isoform 1 [Homo sapiens]	PSMA4	-0.311148	0.81	0	0	0	NP_006631.2
9966827	PEST proteolytic signal-containing nuclear protein [Homo sapiens]	PCNP	-0.311148	0.81	0	0	0	NP_005601.1
28178825	isocitrate dehydrogenase [NADP] cytoplasmic [Homo sapiens]	IDH1	-0.311148	0.81	0	1	0	NP_056016.1
115583685	monocarboxylate transporter 1 [Homo sapiens]	SLC16A1	-0.311148	0.81	0	2	0	NP_004153.2
151101404	prothymosin alpha isoform 2 [Homo sapiens]	PTMA	-0.309359	0.81	0	0	0	NP_003487.1
4506621	60S ribosomal protein L26 [Homo sapiens]	RPL26	-0.309359	0.81	1	0	0	NP_001903.1
21361462	EH domain-containing protein 2 [Homo sapiens]	EHD2	-0.309359	0.81	1	0	0	NP_443082.2
115298682	protein BAT2-like 2 [Homo sapiens]	PRRC2C	-0.309359	0.81	2	0	0	NP_002583.1
156119605	general transcription factor 3C polypeptide 4 [Homo sapiens]	GTF3C4	-0.309359	0.81	2	1	0	NP_004230.2
29826335	eukaryotic translation initiation factor 2 subunit 2 [Homo sapiens]	EIF2S2	-0.307573	0.81	0	0	0	NP_002687.1
89064750	PREDICTED: 26S protease regulatory subunit 6B-like [Homo sapiens]	LOC652826	-0.307573	0.81	0	0	0	NP_002011.2
145386531	D-dopachrome decarboxylase [Homo sapiens]	DDT	-0.307573	0.81	0	0	0	NP_004805.2
4502201	ADP-ribosylation factor 1 [Homo sapiens]	ARF1	-0.305788	0.81	1	0	0	NP_002009.1
17402865	thiosulfate sulfurtransferase [Homo sapiens]	TST	-0.305788	0.81	2	1	0	NP_076988.1
223029424	large subunit GTPase 1 homolog [Homo sapiens]	LSG1	-0.305788	0.81	4	0	0	NP_057105.2
28872725	26S proteasome non-ATPase regulatory subunit 11 [Homo sapiens]	PSMD11	-0.304006	0.81	2	0	0	NP_055969.1
146231994	catenin delta-1 isoform 3A [Homo sapiens]	CTNND1	-0.304006	0.81	2	2	0	NP_008937.1
148727247	ubiquitin carboxyl-terminal hydrolase 5 isoform 2 [Homo sapiens]	USP5	-0.304006	0.81	3	0	0	NP_778235.1
178056552	condensin complex subunit 1 [Homo sapiens]	NCAPD2	-0.304006	0.81	1	0	0	NP_056170.2
148470397	heterogeneous nuclear ribonucleoprotein F [Homo sapiens]	HNRNPF	-0.302226	0.81	0	0	0	NP_004613.1
162329583	cleavage and polyadenylation specificity factor subunit 6 [Homo sapiens]	CPSF6	-0.302226	0.81	1	1	1	NP_976033.1
32484979	AP-3 complex subunit beta-1 [Homo sapiens]	AP3B1	-0.302226	0.81	1	0	0	NP_060245.2
39780588	pre-rRNA-processing protein TSR1 homolog [Homo sapiens]	TSR1	-0.302226	0.81	2	0	0	NP_001284.1
6912674	SNARE-associated protein Snapin [Homo sapiens]	SNAPIN	-0.300448	0.81	0	0	0	NP_116139.1
13786127	cdc42 effector protein 4 [Homo sapiens]	CDC42EP4	-0.300448	0.81	0	2	0	NP_004930.1
39652628	constitutive coactivator of PPAR-gamma-like protein 1 [Homo sapiens]	FAM120A	-0.300448	0.81	2	0	0	NP_001924.2
57863257	T-complex protein 1 subunit alpha isoform a [Homo sapiens]	TCP1	-0.300448	0.81	2	0	0	NP_000412.3
312284072	40S ribosomal protein S17-like [Homo sapiens]	RPS17L	-0.298673	0.81	0	0	0	NP_061176.3
115430112	receptor expression-enhancing protein 5 [Homo sapiens]	REEP5	-0.298673	0.81	0	2	0	NP_005144.2
11125770	aminoacyl tRNA synthase complex-interacting multifunctional protein 2 [Homo sapiens]	AIMP2	-0.296899	0.81	0	0	0	NP_004993.1
78214522	60S ribosomal protein L38 [Homo sapiens]	RPL38	-0.296899	0.81	0	0	0	NP_001135822.1
6912280	activator of 90 kDa heat shock protein ATPase homolog 1 [Homo sapiens]	AHSA1	-0.296899	0.81	2	0	0	NP_005024.2
7330335	chloride intracellular channel protein 4 [Homo sapiens]	CLIC4	-0.296899	0.81	2	0	0	NP_001020604.1
50658063	structural maintenance of chromosomes protein 4 [Homo sapiens]	SMC4	-0.296899	0.81	2	1	0	NP_000364.1
16117791	60S ribosomal protein L35a [Homo sapiens]	RPL35A	-0.295128	0.82	0	0	0	NP_001172110.1
46276863	parathymosin [Homo sapiens]	PTMS	-0.295128	0.82	0	0	0	NP_001093162.1
4506201	proteasome subunit beta type-5 isoform 1 [Homo sapiens]	PSMB5	-0.293359	0.82	0	0	0	NP_005733.1
4506723	40S ribosomal protein S3a [Homo sapiens]	RPS3A	-0.293359	0.82	0	0	0	NP_057038.2
153252132	60S ribosomal protein L31 isoform 3 [Homo sapiens]	RPL31	-0.293359	0.82	0	0	0	NP_683692.2
21071006	protein TSSC4 [Homo sapiens]	TSSC4	-0.291592	0.82	0	0	0	NP_036231.1
22538792	programmed cell death protein 10 [Homo sapiens]	PDCD10	-0.291592	0.82	0	0	0	NP_000998.1
49574537	glycine cleavage system H protein, mitochondrial precursor [Homo sapiens]	GCSH	-0.291592	0.82	1	1	1	NP_981951.1
56605994	CDGSH iron-sulfur domain-containing protein 2 [Homo sapiens]	CISD2	-0.291592	0.82	0	3	0	NP_116198.2
117190254	heterogeneous nuclear ribonucleoproteins C1/C2 isoform b [Homo sapiens]	HNRNPC	-0.291592	0.82	1	1	0	NP_004976.2
15431295	60S ribosomal protein L13 [Homo sapiens]	RPL13	-0.289827	0.82	0	0	0	NP_976063.1
21362092	glycerol-3-phosphate acyltransferase 3 [Homo sapiens]	AGPAT9	-0.289827	0.82	0	0	0	NP_001408.2
4501891	alpha-actinin-1 isoform b [Homo sapiens]	ACTN1	-0.289827	0.82	2	0	0	NP_000691.1
21361376	splicing factor 3A subunit 2 [Homo sapiens]	SF3A2	-0.289827	0.82	1	0	0	NP_001156752.1
57222563	cytoskeleton-associated protein 5 isoform b [Homo sapiens]	CKAP5	-0.289827	0.82	7	0	0	NP_006058.1
4506711	40S ribosomal protein S27 [Homo sapiens]	RPS27	-0.288065	0.82	0	0	0	NP_001165282.1
5453597	F-actin-capping protein subunit alpha-1 [Homo sapiens]	CAPZA1	-0.288065	0.82	1	0	0	NP_079498.2
148839305	structural maintenance of chromosomes flexible hinge domain-containing protein 1 [Homo sapiens]	SMCHD1	-0.288065	0.82	1	4	0	NP_054722.2
25453472	elongation factor 1-delta isoform 2 [Homo sapiens]	EEF1D	-0.286304	0.82	0	0	0	NP_061862.1
7705793	beta-lactamase-like protein 2 [Homo sapiens]	LACTB2	-0.286304	0.82	1	0	0	NP_005156.1
22202611	carboxypeptidase D isoform 1 precursor [Homo sapiens]	CPD	-0.286304	0.82	4	0	0	NP_006560.3
4502643	T-complex protein 1 subunit zeta isoform a [Homo sapiens]	CCT6A	-0.284546	0.82	0	0	0	NP_002037.2
82659085	double-stranded RNA-binding protein Staufen homolog 1 isoform a [Homo sapiens]	STAU1	-0.284546	0.82	0	0	0	NP_001676.2
221316570	cysteine and histidine-rich domain-containing protein 1 isoform b [Homo sapiens]	CHORDC1	-0.284546	0.82	2	0	0	NP_060853.3
4506631	60S ribosomal protein L30 [Homo sapiens]	RPL30	-0.28279	0.82	0	0	0	NP_006545.1
6005846	twinfilin-2 [Homo sapiens]	TWF2	-0.28279	0.82	0	0	0	NP_001157941.1
4504191	DNA mismatch repair protein Msh6 [Homo sapiens]	MSH6	-0.28279	0.82	4	0	0	NP_054753.1
4758638	peroxiredoxin-6 [Homo sapiens]	PRDX6	-0.281036	0.82	0	0	0	NP_001159584.1
4759224	programmed cell death protein 5 [Homo sapiens]	PDCD5	-0.281036	0.82	0	0	0	NP_009166.2
16117789	60S ribosomal protein L34 [Homo sapiens]	RPL34	-0.281036	0.82	0	0	0	NP_003745.1
33356550	G patch domain-containing protein 4 isoform 2 [Homo sapiens]	GPATCH4	-0.281036	0.82	0	0	0	NP_057381.3
91208423	thyroid receptor-interacting protein 6 [Homo sapiens]	TRIP6	-0.281036	0.82	0	0	0	NP_066977.1
4507943	exportin-1 [Homo sapiens]	XPO1	-0.281036	0.82	4	0	0	NP_001080.2
7706427	cleavage and polyadenylation specificity factor subunit 3 [Homo sapiens]	CPSF3	-0.279284	0.82	0	0	0	NP_001164015.1
10863945	X-ray repair cross-complementing protein 5 [Homo sapiens]	XRCC5	-0.279284	0.82	0	0	0	NP_006816.2
302191611	cysteine and glycine-rich protein 1 isoform 3 [Homo sapiens]	CSRP1	-0.279284	0.82	0	0	0	NP_150249.1
48762932	T-complex protein 1 subunit theta [Homo sapiens]	CCT8	-0.277534	0.83	0	0	0	NP_003060.2
310129365	PREDICTED: DNA damage-binding protein 1-like isoform 4 [Homo sapiens]	LOC100290337	-0.277534	0.83	0	0	0	NP_001186509.1
4504517	heat shock protein beta-1 [Homo sapiens]	HSPB1	-0.277534	0.83	0	0	0	NP_003893.2
116256489	septin-9 isoform c [Homo sapiens]	2012-09-09	-0.277534	0.83	0	1	0	NP_004588.1
194018537	phosphoribosyl pyrophosphate synthase-associated protein 1 [Homo sapiens]	PRPSAP1	-0.275786	0.83	1	0	0	NP_001407.1
7662230	E3 ubiquitin-protein ligase BRE1B [Homo sapiens]	RNF40	-0.274041	0.83	0	0	0	NP_077297.2
15834617	TFIIH basal transcription factor complex helicase XPD subunit isoform 1 [Homo sapiens]	ERCC2	-0.274041	0.83	0	0	0	NP_000275.1
24307939	T-complex protein 1 subunit epsilon [Homo sapiens]	CCT5	-0.274041	0.83	1	0	0	NP_001856.2
52485606	formin-like protein 2 [Homo sapiens]	FMNL2	-0.274041	0.83	5	1	0	NP_065933.2
110347420	structural maintenance of chromosomes protein 2 [Homo sapiens]	SMC2	-0.274041	0.83	5	1	0	NP_001035934.2
255308875	7-dehydrocholesterol reductase [Homo sapiens]	DHCR7	-0.274041	0.83	1	1	0	NP_006608.1
29570791	casein kinase II subunit alpha isoform a [Homo sapiens]	CSNK2A1	-0.272297	0.83	0	0	0	NP_064615.3
123173772	tRNA (adenine-N(1)-)-methyltransferase catalytic subunit TRMT61A [Homo sapiens]	TRMT61A	-0.272297	0.83	0	0	0	NP_004866.1
15149476	arginyl-tRNA synthetase, cytoplasmic [Homo sapiens]	RARS	-0.272297	0.83	1	0	0	NP_002884.1
38679974	acetyl-CoA carboxylase 1 isoform 4 [Homo sapiens]	ACACA	-0.272297	0.83	4	2	0	NP_001005731.1
208879470	eukaryotic translation elongation factor 1 epsilon-1 isoform 2 [Homo sapiens]	EEF1E1	-0.272297	0.83	1	0	0	NP_055484.3
4506685	40S ribosomal protein S13 [Homo sapiens]	RPS13	-0.270556	0.83	0	0	0	NP_002963.2
4557495	cleavage stimulation factor subunit 3 isoform 1 [Homo sapiens]	CSTF3	-0.270556	0.83	1	1	0	NP_004274.1
16933546	60S acidic ribosomal protein P0 [Homo sapiens]	RPLP0	-0.270556	0.83	1	0	0	NP_057177.1
32483399	serine/threonine-protein kinase PAK 2 [Homo sapiens]	PAK2	-0.270556	0.83	4	0	0	NP_003747.1
74136552	LDLR chaperone MESD [Homo sapiens]	MESDC2	-0.270556	0.83	0	2	0	NP_001166937.1
4503423	deoxyuridine 5'-triphosphate nucleotidohydrolase, mitochondrial isoform 2 [Homo sapiens]	DUT	-0.268817	0.83	1	0	0	NP_001120668.1
4506671	60S acidic ribosomal protein P2 [Homo sapiens]	RPLP2	-0.26708	0.83	0	0	0	NP_001155059.1
4507143	sorting nexin-3 isoform a [Homo sapiens]	SNX3	-0.26708	0.83	0	0	0	NP_001853.2
4758220	XAP-5 protein [Homo sapiens]	FAM50A	-0.26708	0.83	0	0	0	NP_067050.1
19923485	luc7-like protein 3 [Homo sapiens]	LUC7L3	-0.26708	0.83	0	0	0	NP_001116293.1
24307969	cytoplasmic FMR1-interacting protein 1 isoform a [Homo sapiens]	CYFIP1	-0.26708	0.83	0	0	0	NP_443091.1
32189392	peroxiredoxin-2 isoform a [Homo sapiens]	PRDX2	-0.26708	0.83	0	0	0	NP_001167595.1
4506597	60S ribosomal protein L12 [Homo sapiens]	RPL12	-0.26708	0.83	1	0	0	NP_002107.3
4759212	tubulin-specific chaperone A [Homo sapiens]	TBCA	-0.26708	0.83	1	0	0	NP_056280.2
5803102	mortality factor 4-like protein 1 isoform 1 [Homo sapiens]	MORF4L1	-0.265345	0.83	0	0	0	NP_002952.1
11056061	thymosin beta-4 [Homo sapiens]	TMSB4X	-0.265345	0.83	0	0	0	NP_065101.1
40807447	proline-rich protein PRCC [Homo sapiens]	PRCC	-0.265345	0.83	0	0	0	NP_733779.1
5453555	GTP-binding nuclear protein Ran [Homo sapiens]	RAN	-0.265345	0.83	1	0	0	NP_006169.2
40018640	parafibromin [Homo sapiens]	CDC73	-0.265345	0.83	1	1	0	NP_076424.1
4506761	protein S100-A10 [Homo sapiens]	S100A10	-0.263612	0.83	0	0	0	NP_004896.1
4506921	small glutamine-rich tetratricopeptide repeat-containing protein alpha [Homo sapiens]	SGTA	-0.263612	0.83	0	0	0	NP_067038.1
30023820	hypothetical protein LOC162427 [Homo sapiens]	FAM134C	-0.263612	0.83	0	0	0	NP_055706.1
5031571	actin-related protein 2 isoform b [Homo sapiens]	ACTR2	-0.263612	0.83	1	3	0	NP_932068.2
4506625	60S ribosomal protein L27a [Homo sapiens]	RPL27A	-0.261881	0.83	0	0	0	NP_006256.1
315221152	60S ribosomal protein L11 isoform 2 [Homo sapiens]	RPL11	-0.261881	0.83	0	0	0	NP_473447.1
4758796	developmentally-regulated GTP-binding protein 1 [Homo sapiens]	DRG1	-0.261881	0.83	0	2	1	NP_001032752.1
268607595	ankyrin repeat domain-containing protein 50 isoform 2 [Homo sapiens]	ANKRD50	-0.261881	0.83	3	2	0	NP_003162.2
11559929	coatomer subunit gamma [Homo sapiens]	COPG	-0.260152	0.84	0	0	0	NP_542387.1
148352329	septin-7 isoform 2 [Homo sapiens]	2012-09-07	-0.260152	0.84	0	0	0	NP_115497.4
24430146	nuclear pore complex protein Nup153 [Homo sapiens]	NUP153	-0.260152	0.84	4	1	0	NP_060130.3
41406064	myosin-10 [Homo sapiens]	MYH10	-0.260152	0.84	6	0	0	NP_776065.1
4757766	rho GTPase-activating protein 1 [Homo sapiens]	ARHGAP1	-0.258425	0.84	0	0	0	NP_001393.1
77404397	staphylococcal nuclease domain-containing protein 1 [Homo sapiens]	SND1	-0.258425	0.84	0	0	0	NP_061856.1
111378393	sodium channel protein type 7 subunit alpha [Homo sapiens]	SCN7A	-0.258425	0.84	0	0	0	NP_061820.1
21464101	14-3-3 protein gamma [Homo sapiens]	YWHAG	-0.258425	0.84	0	1	0	NP_001013009.2
17738287	secretory carrier-associated membrane protein 4 [Homo sapiens]	SCAMP4	-0.2567	0.84	0	0	0	NP_003290.1
58761500	obg-like ATPase 1 isoform 1 [Homo sapiens]	OLA1	-0.2567	0.84	0	0	0	NP_001017423.1
7706200	mesenchymal stem cell protein DSCD75 precursor [Homo sapiens]	C8orf55	-0.2567	0.84	1	0	0	NP_001131076.1
145701028	protein midA homolog, mitochondrial isoform 3 [Homo sapiens]	C2orf56	-0.2567	0.84	2	0	0	NP_005868.1
190341074	pyridoxal-dependent decarboxylase domain-containing protein 1 [Homo sapiens]	PDXDC1	-0.2567	0.84	1	0	0	NP_057707.3
212286159	protein MEMO1 isoform 2 [Homo sapiens]	MEMO1	-0.254978	0.84	0	0	0	NP_000985.1
215599424	alanine aminotransferase 2 isoform 2 [Homo sapiens]	GPT2	-0.254978	0.84	0	0	0	NP_005745.1
4507645	triosephosphate isomerase isoform 1 [Homo sapiens]	TPI1	-0.254978	0.84	2	1	0	NP_001014.1
5730027	KH domain-containing, RNA-binding, signal transduction-associated protein 1 [Homo sapiens]	KHDRBS1	-0.254978	0.84	1	0	0	NP_004882.1
21361370	glycogen phosphorylase, brain form [Homo sapiens]	PYGB	-0.254978	0.84	1	1	0	NP_036555.1
116089325	splicing regulatory glutamine/lysine-rich protein 1 isoform a [Homo sapiens]	SREK1	-0.254978	0.84	0	1	0	NP_612437.3
195539395	26S protease regulatory subunit 10B [Homo sapiens]	PSMC6	-0.254978	0.84	1	0	0	NP_057269.1
167830436	probable ATP-dependent RNA helicase DHX36 isoform 2 [Homo sapiens]	DHX36	-0.253257	0.84	0	0	0	NP_001672.1
5453740	myosin regulatory light chain 12A [Homo sapiens]	MYL12A	-0.253257	0.84	0	1	0	NP_002564.1
262399389	RNA-binding protein 6 isoform 2 [Homo sapiens]	RBM6	-0.253257	0.84	2	0	0	NP_004715.1
24308133	transmembrane and coiled-coil domain-containing protein 1 [Homo sapiens]	TMCO1	-0.251539	0.84	0	0	0	NP_258412.1
66933016	inosine-5'-monophosphate dehydrogenase 2 [Homo sapiens]	IMPDH2	-0.251539	0.84	0	0	0	NP_110440.1
16445421	secretory carrier-associated membrane protein 3 isoform 2 [Homo sapiens]	SCAMP3	-0.251539	0.84	0	1	1	NP_203754.2
251823858	regulatory-associated protein of mTOR isoform 2 [Homo sapiens]	RPTOR	-0.251539	0.84	4	1	0	NP_055862.1
289577125	transcription factor Sp3 isoform 2 [Homo sapiens]	SP3	-0.251539	0.84	1	2	0	NP_001070957.1
296040507	glycogenin-1 isoform 3 [Homo sapiens]	GYG1	-0.249822	0.84	0	0	0	NP_004246.2
126032350	DNA-dependent protein kinase catalytic subunit isoform 2 [Homo sapiens]	PRKDC	-0.249822	0.84	5	1	1	NP_878273.1
7661892	REST corepressor 1 [Homo sapiens]	RCOR1	-0.249822	0.84	1	1	0	NP_055859.1
21361741	vacuolar protein sorting-associated protein VTA1 homolog [Homo sapiens]	VTA1	-0.249822	0.84	2	0	0	NP_063955.2
122939157	component of gems 4 [Homo sapiens]	GEMIN4	-0.249822	0.84	1	1	0	NP_079366.3
146134341	hypothetical protein LOC133686 isoform 1 [Homo sapiens]	NADKD1	-0.249822	0.84	1	0	0	NP_001017392.2
189181666	beta-hexosaminidase subunit alpha preproprotein [Homo sapiens]	HEXA	-0.249822	0.84	2	0	0	NP_115686.3
18201905	glucose-6-phosphate isomerase isoform 2 [Homo sapiens]	GPI	-0.248108	0.84	2	3	1	NP_061313.2
4506017	serine/threonine-protein phosphatase 2A catalytic subunit alpha isoform [Homo sapiens]	PPP2CA	-0.248108	0.84	1	0	0	NP_002023.2
4507357	transgelin-2 [Homo sapiens]	TAGLN2	-0.248108	0.84	0	1	0	NP_005498.1
4826960	glutaminyl-tRNA synthetase [Homo sapiens]	QARS	-0.248108	0.84	1	0	0	NP_001003.1
52352803	zinc transporter 1 [Homo sapiens]	SLC30A1	-0.248108	0.84	1	1	0	NP_001120794.1
150378533	ubiquitin carboxyl-terminal hydrolase 7 [Homo sapiens]	USP7	-0.248108	0.84	0	1	0	NP_872286.1
4506607	60S ribosomal protein L18 [Homo sapiens]	RPL18	-0.246395	0.84	0	0	0	NP_005751.2
13904870	40S ribosomal protein S5 [Homo sapiens]	RPS5	-0.246395	0.84	0	0	0	NP_958434.1
19923193	hsc70-interacting protein [Homo sapiens]	ST13	-0.246395	0.84	0	0	0	NP_078991.3
157426877	RNA 3'-terminal phosphate cyclase-like protein [Homo sapiens]	RCL1	-0.246395	0.84	0	0	0	NP_000979.1
193211480	superkiller viralicidic activity 2-like 2 [Homo sapiens]	SKIV2L2	-0.246395	0.84	2	0	0	NP_005920.2
6912634	60S ribosomal protein L13a [Homo sapiens]	RPL13A	-0.244685	0.84	0	0	0	NP_001474.1
4502107	annexin A5 [Homo sapiens]	ANXA5	-0.244685	0.84	1	0	0	NP_954699.1
4757926	RNA-binding protein 39 isoform b [Homo sapiens]	RBM39	-0.244685	0.84	2	0	0	NP_002878.2
4506005	serine/threonine-protein phosphatase PP1-beta catalytic subunit isoform 1 [Homo sapiens]	PPP1CB	-0.242977	0.85	0	0	0	NP_006393.2
78000183	60S ribosomal protein L14 [Homo sapiens]	RPL14	-0.242977	0.85	0	0	0	NP_008856.2
10863927	peptidyl-prolyl cis-trans isomerase A [Homo sapiens]	PPIA	-0.242977	0.85	1	0	0	NP_003096.1
14043022	methionyl-tRNA synthetase, cytoplasmic [Homo sapiens]	MARS	-0.242977	0.85	2	0	0	NP_001905.1
28882049	replication factor C subunit 2 isoform 2 [Homo sapiens]	RFC2	-0.242977	0.85	1	0	0	NP_000134.2
66363694	HCLS1-associated protein X-1 isoform b [Homo sapiens]	HAX1	-0.242977	0.85	0	0	0	NP_112493.2
148728170	oxidoreductase HTATIP2 isoform c [Homo sapiens]	HTATIP2	-0.24127	0.85	0	0	0	NP_060517.1
4506289	tyrosine-protein phosphatase non-receptor type 1 [Homo sapiens]	PTPN1	-0.24127	0.85	1	0	0	NP_001157636.1
23065552	glutathione S-transferase Mu 3 [Homo sapiens]	GSTM3	-0.24127	0.85	0	1	0	NP_055567.2
6005890	transcription elongation factor B polypeptide 2 isoform a [Homo sapiens]	TCEB2	-0.239566	0.85	0	0	0	NP_116199.2
17402904	exosome complex exonuclease MTR3 [Homo sapiens]	EXOSC6	-0.239566	0.85	0	0	0	NP_001070667.1
33457348	hypothetical protein LOC56005 precursor [Homo sapiens]	C19orf10	-0.239566	0.85	0	0	0	NP_001186658.1
45006986	aminoacyl tRNA synthase complex-interacting multifunctional protein 1 isoform a precursor [Homo sapiens]	AIMP1	-0.239566	0.85	1	0	0	NP_620305.1
17105394	60S ribosomal protein L23a [Homo sapiens]	RPL23A	-0.237864	0.85	0	0	0	NP_001182068.1
4506635	60S ribosomal protein L32 [Homo sapiens]	RPL32	-0.237864	0.85	0	1	1	NP_722550.1
4557769	mevalonate kinase [Homo sapiens]	MVK	-0.237864	0.85	1	0	0	NP_002256.2
6679189	transmembrane emp24 domain-containing protein 3 precursor [Homo sapiens]	TMED3	-0.237864	0.85	1	0	0	NP_079172.2
7661950	RNA polymerase-associated protein CTR9 homolog [Homo sapiens]	CTR9	-0.237864	0.85	2	0	0	NP_079272.4
65288071	tensin-3 [Homo sapiens]	TNS3	-0.237864	0.85	0	0	0	NP_001032583.1
88900507	protein arginine N-methyltransferase 5 isoform b [Homo sapiens]	PRMT5	-0.237864	0.85	1	0	0	NP_001156506.1
222352151	poly(rC)-binding protein 1 [Homo sapiens]	PCBP1	-0.236164	0.85	0	0	0	NP_006296.1
5453634	cytoplasmic dynein 1 light intermediate chain 2 [Homo sapiens]	DYNC1LI2	-0.236164	0.85	1	0	0	NP_001957.2
73747844	DNA ligase 3 isoform beta precursor [Homo sapiens]	LIG3	-0.236164	0.85	1	0	0	NP_000099.2
124256489	crooked neck-like protein 1 [Homo sapiens]	CRNKL1	-0.236164	0.85	3	1	0	NP_002435.1
16117794	60S ribosomal protein L36 [Homo sapiens]	RPL36	-0.234465	0.85	0	0	0	NP_056329.1
34740329	heterogeneous nuclear ribonucleoprotein A3 [Homo sapiens]	HNRNPA3	-0.234465	0.85	0	0	0	NP_009109.3
5174539	malate dehydrogenase, cytoplasmic isoform 2 [Homo sapiens]	MDH1	-0.234465	0.85	1	0	0	NP_001179.1
14327896	G2/mitotic-specific cyclin-B1 [Homo sapiens]	CCNB1	-0.234465	0.85	2	0	0	NP_004640.3
23238211	actin-related protein 2/3 complex subunit 2 [Homo sapiens]	ARPC2	-0.234465	0.85	0	1	0	NP_001161078.1
68299795	chromodomain-helicase-DNA-binding protein 1 [Homo sapiens]	CHD1	-0.234465	0.85	3	0	0	NP_001041666.1
157389005	calpain-2 catalytic subunit isoform 1 [Homo sapiens]	CAPN2	-0.234465	0.85	2	0	0	NP_055199.1
157502193	26S proteasome non-ATPase regulatory subunit 13 isoform 1 [Homo sapiens]	PSMD13	-0.232769	0.85	0	0	0	NP_001026866.1
305410793	glutathione reductase, mitochondrial isoform 4 precursor [Homo sapiens]	GSR	-0.232769	0.85	0	0	0	NP_004648.1
50592996	tubulin beta-3 chain isoform 1 [Homo sapiens]	TUBB3	-0.231075	0.85	0	0	0	NP_071324.1
154355000	far upstream element-binding protein 2 [Homo sapiens]	KHSRP	-0.231075	0.85	0	0	0	NP_000089.1
5902090	solute carrier family 2, facilitated glucose transporter member 3 [Homo sapiens]	SLC2A3	-0.231075	0.85	1	1	0	NP_002257.1
4506661	60S ribosomal protein L7a [Homo sapiens]	RPL7A	-0.229382	0.85	0	0	0	NP_877420.1
40789249	aspartyl-tRNA synthetase, mitochondrial precursor [Homo sapiens]	DARS2	-0.229382	0.85	4	0	0	NP_001189343.1
194018522	eukaryotic peptide chain release factor GTP-binding subunit ERF3A isoform 3 [Homo sapiens]	GSPT1	-0.229382	0.85	3	2	0	NP_006112.3
293336691	histone deacetylase 2 [Homo sapiens]	HDAC2	-0.229382	0.85	0	1	0	NP_001029031.1
16418351	coiled-coil domain-containing protein 97 [Homo sapiens]	CCDC97	-0.227692	0.85	0	0	0	NP_009140.1
150010589	interferon-induced transmembrane protein 1 [Homo sapiens]	IFITM1	-0.227692	0.85	0	0	0	NP_057001.1
7705889	epidermal growth factor-like protein 7 [Homo sapiens]	EGFL7	-0.227692	0.85	1	0	0	NP_066552.2
255003738	regulator of differentiation 1 isoform 2 [Homo sapiens]	ROD1	-0.227692	0.85	1	2	0	NP_001035095.1
7661744	basic leucine zipper and W2 domain-containing protein 2 [Homo sapiens]	BZW2	-0.226004	0.86	0	0	0	NP_004652.2
11415026	60S ribosomal protein L18a [Homo sapiens]	RPL18A	-0.226004	0.86	0	0	0	NP_005821.2
4506749	ribonucleoside-diphosphate reductase large subunit [Homo sapiens]	RRM1	-0.226004	0.86	1	0	0	NP_001035526.1
4885399	structural maintenance of chromosomes protein 3 [Homo sapiens]	SMC3	-0.226004	0.86	4	0	0	NP_001460.1
5454024	ribonuclease P protein subunit p30 isoform b [Homo sapiens]	RPP30	-0.224317	0.86	0	0	0	NP_001160159.1
48255968	UTP--glucose-1-phosphate uridylyltransferase isoform b [Homo sapiens]	UGP2	-0.224317	0.86	0	0	0	NP_005079.2
7705819	immediate early response 3-interacting protein 1 [Homo sapiens]	IER3IP1	-0.224317	0.86	0	1	0	NP_001032755.1
31657129	phosphoribosylformylglycinamidine synthase [Homo sapiens]	PFAS	-0.224317	0.86	4	0	0	XP_001129774.2
8923394	transmembrane protein 161A precursor [Homo sapiens]	TMEM161A	-0.222633	0.86	0	0	0	NP_003165.2
171460928	1,2-dihydroxy-3-keto-5-methylthiopentene dioxygenase [Homo sapiens]	ADI1	-0.222633	0.86	0	0	0	NP_006358.1
4507185	sepiapterin reductase [Homo sapiens]	SPR	-0.222633	0.86	1	0	0	NP_004081.1
14141170	metastasis-associated protein MTA2 [Homo sapiens]	MTA2	-0.222633	0.86	1	0	0	NP_001186780.1
18104948	60S ribosomal protein L21 [Homo sapiens]	RPL21	-0.222633	0.86	1	0	0	NP_060542.4
13027602	DDRGK domain-containing protein 1 precursor [Homo sapiens]	DDRGK1	-0.22095	0.86	0	0	0	NP_005372.2
20357556	src substrate cortactin isoform b [Homo sapiens]	CTTN	-0.22095	0.86	0	0	0	NP_067017.2
23503295	casein kinase II subunit beta [Homo sapiens]	CSNK2B	-0.22095	0.86	2	0	0	NP_060102.1
32455256	LAG1 longevity assurance homolog 2 [Homo sapiens]	CERS2	-0.22095	0.86	2	0	0	NP_619634.1
260166622	zinc phosphodiesterase ELAC protein 2 isoform 2 [Homo sapiens]	ELAC2	-0.22095	0.86	2	0	0	NP_006301.3
12232385	COP9 signalosome complex subunit 7b [Homo sapiens]	COPS7B	-0.21927	0.86	0	0	0	NP_000684.2
167466171	hyaluronan synthase 1 [Homo sapiens]	HAS1	-0.21927	0.86	2	0	0	NP_000365.3
209180481	E3 ubiquitin-protein ligase Hakai [Homo sapiens]	CBLL1	-0.217591	0.86	0	0	0	NP_000549.1
123173757	ribonucleoprotein PTB-binding 1 [Homo sapiens]	RAVER1	-0.217591	0.86	1	0	0	NP_001317.1
300116164	origin recognition complex subunit 4 isoform 2 [Homo sapiens]	ORC4	-0.217591	0.86	0	1	0	NP_065826.2
5453990	proteasome activator complex subunit 1 isoform 1 [Homo sapiens]	PSME1	-0.215915	0.86	0	0	0	NP_078954.4
14591909	60S ribosomal protein L5 [Homo sapiens]	RPL5	-0.215915	0.86	0	0	0	NP_031397.1
4506403	retinoic acid-induced protein 3 [Homo sapiens]	GPRC5A	-0.215915	0.86	1	1	0	NP_002794.1
4507785	SUMO-conjugating enzyme UBC9 [Homo sapiens]	UBE2I	-0.215915	0.86	1	0	0	NP_001002257.1
27754773	protocadherin-1 isoform 2 precursor [Homo sapiens]	PCDH1	-0.215915	0.86	3	0	0	NP_065724.1
169163387	PREDICTED: peptidyl-prolyl cis-trans isomerase A-like [Homo sapiens]	LOC650157	-0.215915	0.86	1	0	0	NP_001001132.1
14211889	protein dpy-30 homolog [Homo sapiens]	DPY30	-0.21424	0.86	0	0	0	NP_000928.1
15431301	60S ribosomal protein L7 [Homo sapiens]	RPL7	-0.21424	0.86	0	0	0	NP_055439.1
18426915	drebrin isoform a [Homo sapiens]	DBN1	-0.21424	0.86	0	0	0	NP_683710.1
19913441	hippocalcin-like protein 1 [Homo sapiens]	HPCAL1	-0.21424	0.86	0	0	0	NP_002943.2
47078240	COP9 signalosome complex subunit 1 isoform 2 [Homo sapiens]	GPS1	-0.21424	0.86	0	0	0	NP_002346.1
75709192	BRCA1-A complex subunit MERIT40 [Homo sapiens]	BABAM1	-0.21424	0.86	0	0	0	NP_002203.1
310129243	PREDICTED: Parkinson disease 7 domain-containing protein 1-like, partial [Homo sapiens]	LOC100294349	-0.21424	0.86	0	0	0	NP_060777.3
18702323	dynein light chain roadblock-type 2 [Homo sapiens]	DYNLRB2	-0.212568	0.86	0	0	0	NP_001003712.1
21361361	acetolactate synthase-like protein [Homo sapiens]	ILVBL	-0.212568	0.86	0	0	0	NP_000185.1
301171475	ATP-dependent RNA helicase DDX3X isoform 3 [Homo sapiens]	DDX3X	-0.212568	0.86	1	0	0	NP_004422.2
13775200	splicing factor 3B subunit 5 [Homo sapiens]	SF3B5	-0.210897	0.86	0	0	0	NP_004388.2
70995396	NAD(P)H dehydrogenase [quinone] 1 isoform b [Homo sapiens]	NQO1	-0.210897	0.86	0	0	0	NP_004461.2
4557741	platelet-activating factor acetylhydrolase IB subunit alpha [Homo sapiens]	PAFAH1B1	-0.210897	0.86	1	2	0	NP_061156.1
5729730	apoptosis inhibitor 5 isoform b [Homo sapiens]	API5	-0.210897	0.86	1	0	0	NP_444252.1
60499021	ferrochelatase, mitochondrial isoform b precursor [Homo sapiens]	FECH	-0.210897	0.86	2	0	0	NP_064696.1
14249158	hepatoma-derived growth factor-related protein 2 isoform 2 [Homo sapiens]	HDGFRP2	-0.209228	0.87	0	0	0	NP_006749.1
166235186	probable methylthioribulose-1-phosphate dehydratase [Homo sapiens]	APIP	-0.209228	0.87	1	0	0	NP_001128410.1
7706322	homeobox prox 1 [Homo sapiens]	C14orf166	-0.207561	0.87	0	0	0	NP_004437.2
7657015	hypothetical protein LOC51493 [Homo sapiens]	C22orf28	-0.207561	0.87	1	0	0	NP_003091.2
14149738	neurolysin, mitochondrial precursor [Homo sapiens]	NLN	-0.207561	0.87	0	3	0	NP_054786.2
87299628	biorientation of chromosomes in cell division protein 1-like [Homo sapiens]	BOD1L	-0.207561	0.87	3	0	0	NP_006380.1
5031857	L-lactate dehydrogenase A chain isoform 1 [Homo sapiens]	LDHA	-0.205896	0.87	0	0	0	YP_003024029.1
15431288	60S ribosomal protein L10a [Homo sapiens]	RPL10A	-0.205896	0.87	0	0	0	NP_036244.2
4557305	fructose-bisphosphate aldolase A [Homo sapiens]	ALDOA	-0.205896	0.87	0	0	0	NP_872353.2
27597090	transcription elongation factor SPT6 [Homo sapiens]	SUPT6H	-0.205896	0.87	2	0	0	NP_839945.1
40217790	zinc finger protein 512 [Homo sapiens]	ZNF512	-0.205896	0.87	1	0	0	NP_001138621.1
297747286	prefoldin subunit 6 [Homo sapiens]	PFDN6	-0.204233	0.87	0	0	0	NP_998776.1
4507525	translocation protein SEC62 [Homo sapiens]	SEC62	-0.204233	0.87	2	2	1	NP_003917.1
150417996	ubiquitin-like modifier-activating enzyme 6 [Homo sapiens]	UBA6	-0.204233	0.87	3	1	1	NP_004379.1
4506129	ribose-phosphate pyrophosphokinase 2 isoform 2 [Homo sapiens]	PRPS2	-0.204233	0.87	0	1	0	NP_001060.1
7662645	28S ribosomal protein S18b, mitochondrial precursor [Homo sapiens]	MRPS18B	-0.204233	0.87	1	0	0	NP_001123989.1
194353979	3-ketoacyl-CoA thiolase, peroxisomal isoform b [Homo sapiens]	ACAA1	-0.204233	0.87	1	0	0	NP_073572.2
13376840	WD repeat-containing protein 61 [Homo sapiens]	WDR61	-0.202572	0.87	0	0	0	NP_056455.3
61743967	C-terminal-binding protein 1 isoform 2 [Homo sapiens]	CTBP1	-0.202572	0.87	0	0	0	NP_060979.2
25286703	KIAA2013 protein precursor [Homo sapiens]	KIAA2013	-0.202572	0.87	1	0	0	NP_056437.4
222136639	C-1-tetrahydrofolate synthase, cytoplasmic [Homo sapiens]	MTHFD1	-0.202572	0.87	2	0	0	NP_001008800.1
17149842	peptidyl-prolyl cis-trans isomerase FKBP2 precursor [Homo sapiens]	FKBP2	-0.200913	0.87	0	0	0	NP_003085.1
4758958	cAMP-dependent protein kinase type II-alpha regulatory subunit [Homo sapiens]	PRKAR2A	-0.200913	0.87	1	0	0	NP_004680.2
21361176	retinal dehydrogenase 1 [Homo sapiens]	ALDH1A1	-0.200913	0.87	1	0	0	NP_006801.1
50428925	tubulin-folding cofactor B [Homo sapiens]	TBCB	-0.200913	0.87	3	0	0	NP_001164980.1
67089147	squalene synthase [Homo sapiens]	FDFT1	-0.200913	0.87	2	0	0	NP_775788.2
110671329	lipoamide acyltransferase component of branched-chain alpha-keto acid dehydrogenase complex, mitochondrial precursor [Homo sapiens]	DBT	-0.200913	0.87	0	1	0	NP_001008.1
148539872	acetyl-CoA acetyltransferase, cytosolic [Homo sapiens]	ACAT2	-0.200913	0.87	2	0	0	NP_001960.2
47419914	tryptophanyl-tRNA synthetase, cytoplasmic isoform a [Homo sapiens]	WARS	-0.199255	0.87	0	0	0	NP_003341.1
4507789	ubiquitin-conjugating enzyme E2 L3 [Homo sapiens]	UBE2L3	-0.199255	0.87	1	0	0	NP_054894.1
5031593	actin-related protein 2/3 complex subunit 5 [Homo sapiens]	ARPC5	-0.199255	0.87	0	1	0	NP_060354.4
5453918	peroxisomal membrane protein PMP34 [Homo sapiens]	SLC25A17	-0.199255	0.87	1	1	0	NP_001013685.1
30795212	insulin-like growth factor 2 mRNA-binding protein 3 [Homo sapiens]	IGF2BP3	-0.199255	0.87	1	1	0	XP_003119304.1
40254947	thioredoxin-related transmembrane protein 4 precursor [Homo sapiens]	TMX4	-0.199255	0.87	1	0	0	NP_003134.1
45643119	peroxisomal 3,2-trans-enoyl-CoA isomerase isoform 1 [Homo sapiens]	ECI2	-0.199255	0.87	0	1	0	NP_056121.2
94421469	thioredoxin domain-containing protein 15 precursor [Homo sapiens]	TXNDC15	-0.199255	0.87	2	0	0	NP_001024.1
4506623	60S ribosomal protein L27 [Homo sapiens]	RPL27	-0.1976	0.87	0	0	0	NP_057181.1
116063573	filamin-A isoform 1 [Homo sapiens]	FLNA	-0.1976	0.87	0	0	0	NP_036601.2
288915539	plastin-3 isoform 2 [Homo sapiens]	PLS3	-0.1976	0.87	4	0	0	NP_002860.2
4507229	succinate-semialdehyde dehydrogenase, mitochondrial isoform 2 precursor [Homo sapiens]	ALDH5A1	-0.195946	0.87	1	1	0	NP_001136026.1
11034845	regulation of nuclear pre-mRNA domain-containing protein 1B [Homo sapiens]	RPRD1B	-0.195946	0.87	1	1	0	NP_001120792.1
10947135	ATP-binding cassette sub-family F member 1 isoform b [Homo sapiens]	ABCF1	-0.194295	0.87	0	0	0	NP_001020092.1
8923857	transmembrane protein 111 [Homo sapiens]	TMEM111	-0.194295	0.87	0	0	0	NP_079348.1
116008442	zinc finger CCCH domain-containing protein 13 [Homo sapiens]	ZC3H13	-0.194295	0.87	1	0	0	NP_001166983.1
4506741	40S ribosomal protein S7 [Homo sapiens]	RPS7	-0.192645	0.88	0	0	0	NP_036275.1
5032027	histone-binding protein RBBP4 isoform a [Homo sapiens]	RBBP4	-0.192645	0.88	0	0	0	NP_940997.1
5803227	14-3-3 protein theta [Homo sapiens]	YWHAQ	-0.192645	0.88	0	0	0	NP_006828.2
296179384	clathrin light chain A isoform f [Homo sapiens]	CLTA	-0.192645	0.88	0	0	0	NP_002309.1
20127454	bifunctional purine biosynthesis protein PURH [Homo sapiens]	ATIC	-0.192645	0.88	1	1	0	NP_001018065.1
24431933	reticulon-4 isoform B [Homo sapiens]	RTN4	-0.192645	0.88	2	0	0	NP_079472.1
47419936	serine/threonine-protein kinase SRPK1 [Homo sapiens]	SRPK1	-0.190997	0.88	0	0	0	NP_115866.1
50428938	ATPase ASNA1 [Homo sapiens]	ASNA1	-0.190997	0.88	0	0	0	NP_443131.2
116517313	mannose-P-dolichol utilization defect 1 protein [Homo sapiens]	MPDU1	-0.190997	0.88	1	2	0	NP_444505.1
21071044	probable global transcription activator SNF2L1 isoform a [Homo sapiens]	SMARCA1	-0.189351	0.88	5	0	0	NP_001531.1
132626688	mediator of DNA damage checkpoint protein 1 [Homo sapiens]	MDC1	-0.189351	0.88	1	0	0	NP_057291.1
20544151	chromobox protein homolog 3 [Homo sapiens]	CBX3	-0.187707	0.88	0	0	0	NP_542172.2
156564398	target of EGR1 protein 1 [Homo sapiens]	TOE1	-0.187707	0.88	0	0	0	NP_003065.3
14165435	heterogeneous nuclear ribonucleoprotein K isoform b [Homo sapiens]	HNRNPK	-0.186065	0.88	0	0	0	NP_003752.2
18375673	regulator of nonsense transcripts 1 [Homo sapiens]	UPF1	-0.184425	0.88	0	1	0	NP_006127.1
5730023	ruvB-like 2 [Homo sapiens]	RUVBL2	-0.182786	0.88	0	0	0	NP_066926.1
66392203	NME1-NME2 protein [Homo sapiens]	NME1-NME2	-0.182786	0.88	0	0	0	NP_060101.3
20270327	transmembrane 4 L6 family member 18 [Homo sapiens]	TM4SF18	-0.182786	0.88	1	0	0	NP_006089.1
40807491	long-chain-fatty-acid--CoA ligase 1 [Homo sapiens]	ACSL1	-0.182786	0.88	1	0	0	NP_061980.1
5729875	membrane-associated progesterone receptor component 1 [Homo sapiens]	PGRMC1	-0.181149	0.88	0	0	0	NP_705931.1
13699256	nuclear inhibitor of protein phosphatase 1 isoform alpha [Homo sapiens]	PPP1R8	-0.181149	0.88	0	0	0	NP_001136122.1
95113651	glutaredoxin-3 [Homo sapiens]	GLRX3	-0.181149	0.88	0	0	0	NP_057190.2
113430845	PREDICTED: DNA-dependent protein kinase catalytic subunit-like [Homo sapiens]	LOC731751	-0.181149	0.88	0	0	0	NP_060082.2
321267511	protein NipSnap homolog 1 isoform 2 [Homo sapiens]	NIPSNAP1	-0.181149	0.88	0	0	0	NP_115737.1
4506407	ran-specific GTPase-activating protein [Homo sapiens]	RANBP1	-0.181149	0.88	1	0	0	NP_001137545.1
34878777	E3 ubiquitin-protein ligase BRE1A [Homo sapiens]	RNF20	-0.181149	0.88	4	0	0	NP_065090.1
4507149	superoxide dismutase [Cu-Zn] [Homo sapiens]	SOD1	-0.179515	0.88	0	0	0	NP_055555.1
310114265	PREDICTED: hypothetical protein LOC100506055, partial [Homo sapiens]	LOC100506055	-0.179515	0.88	0	0	0	NP_055950.1
4557014	catalase [Homo sapiens]	CAT	-0.179515	0.88	2	2	0	NP_116211.2
24307879	cytoplasmic dynein 1 intermediate chain 2 [Homo sapiens]	DYNC1I2	-0.179515	0.88	1	0	0	NP_001746.1
27477138	zinc finger CCCH-type antiviral protein 1 isoform 2 [Homo sapiens]	ZC3HAV1	-0.179515	0.88	1	0	0	NP_001018238.1
32171175	protein BUD31 homolog [Homo sapiens]	BUD31	-0.179515	0.88	1	0	0	NP_008830.2
41872631	fatty acid synthase [Homo sapiens]	FASN	-0.179515	0.88	6	0	0	NP_000704.1
6912676	SNW domain-containing protein 1 [Homo sapiens]	SNW1	-0.177882	0.88	2	2	0	NP_997544.1
13569956	actin-related protein 2/3 complex subunit 5-like protein [Homo sapiens]	ARPC5L	-0.177882	0.88	1	0	0	NP_001129122.1
41327764	aflatoxin B1 aldehyde reductase member 2 [Homo sapiens]	AKR7A2	-0.177882	0.88	1	0	0	NP_060856.2
7669492	glyceraldehyde-3-phosphate dehydrogenase [Homo sapiens]	GAPDH	-0.176251	0.89	0	0	0	NP_110409.2
38176151	protein lunapark [Homo sapiens]	KIAA1715	-0.176251	0.89	0	2	1	NP_060898.2
4507145	sorting nexin-4 [Homo sapiens]	SNX4	-0.176251	0.89	2	0	0	NP_075046.1
24308113	KIF1-binding protein [Homo sapiens]	KIAA1279	-0.176251	0.89	2	0	0	NP_003749.2
4506605	60S ribosomal protein L23 [Homo sapiens]	RPL23	-0.174621	0.89	0	0	0	NP_061173.1
4506629	60S ribosomal protein L29 [Homo sapiens]	RPL29	-0.174621	0.89	0	0	0	NP_005552.3
40068475	twinfilin-1 [Homo sapiens]	TWF1	-0.174621	0.89	0	0	0	NP_000260.1
169234661	tumor protein 63 isoform 4 [Homo sapiens]	TP63	-0.174621	0.89	0	0	0	NP_002967.2
60279268	splicing factor U2AF 65 kDa subunit isoform b [Homo sapiens]	U2AF2	-0.174621	0.89	0	1	1	NP_057227.2
208973246	dihydropteridine reductase [Homo sapiens]	QDPR	-0.174621	0.89	1	0	0	NP_001653.1
217416369	GTP-binding protein SAR1a [Homo sapiens]	SAR1A	-0.174621	0.89	0	1	0	NP_000272.1
296317239	peroxisomal membrane protein 11B isoform 2 [Homo sapiens]	PEX11B	-0.174621	0.89	1	0	0	NP_001003796.1
311893363	calpain-1 catalytic subunit isoform a [Homo sapiens]	CAPN1	-0.172994	0.89	0	0	0	NP_055107.3
4758816	glycylpeptide N-tetradecanoyltransferase 2 [Homo sapiens]	NMT2	-0.172994	0.89	2	1	0	NP_777358.1
9910460	omega-amidase NIT2 [Homo sapiens]	NIT2	-0.172994	0.89	1	0	0	NP_002408.3
27436951	lamin-B2 [Homo sapiens]	LMNB2	-0.172994	0.89	1	1	0	NP_001070908.1
4504111	growth factor receptor-bound protein 2 isoform 1 [Homo sapiens]	GRB2	-0.171368	0.89	0	1	0	NP_005774.2
42476169	RNA polymerase II-associated factor 1 homolog [Homo sapiens]	PAF1	-0.171368	0.89	2	0	0	NP_003087.1
4505621	phosphatidylethanolamine-binding protein 1 [Homo sapiens]	PEBP1	-0.169745	0.89	0	0	0	NP_001121167.1
5032087	splicing factor 3A subunit 1 isoform 1 [Homo sapiens]	SF3A1	-0.169745	0.89	0	0	0	NP_003521.2
7657176	protein canopy homolog 2 isoform 1 precursor [Homo sapiens]	CNPY2	-0.169745	0.89	1	1	0	NP_001896.2
45387945	extended synaptotagmin-2 [Homo sapiens]	ESYT2	-0.169745	0.89	2	0	0	NP_064621.3
82546824	forkhead box protein K1 [Homo sapiens]	FOXK1	-0.169745	0.89	1	0	0	NP_644810.1
119395760	protein diaphanous homolog 1 isoform 2 [Homo sapiens]	DIAPH1	-0.169745	0.89	1	1	0	NP_001015891.1
4505763	phosphoglycerate kinase 1 [Homo sapiens]	PGK1	-0.168123	0.89	0	0	0	NP_005773.3
4758352	adrenodoxin, mitochondrial precursor [Homo sapiens]	FDX1	-0.168123	0.89	0	0	0	NP_002071.2
37594464	ADP-sugar pyrophosphatase [Homo sapiens]	NUDT5	-0.168123	0.89	0	0	0	NP_115690.3
295842330	splicing factor 1 isoform 6 [Homo sapiens]	SF1	-0.168123	0.89	0	0	0	NP_115867.2
5031573	actin-related protein 3 [Homo sapiens]	ACTR3	-0.168123	0.89	1	1	0	NP_002850.2
9257257	WD repeat-containing protein 1 isoform 1 [Homo sapiens]	WDR1	-0.168123	0.89	1	0	0	NP_006604.1
19920317	cytoskeleton-associated protein 4 [Homo sapiens]	CKAP4	-0.168123	0.89	2	0	0	NP_000098.1
171184400	ATP-binding cassette sub-family B member 10, mitochondrial precursor [Homo sapiens]	ABCB10	-0.168123	0.89	0	1	0	NP_002077.1
224177556	lanosterol synthase isoform 2 [Homo sapiens]	LSS	-0.168123	0.89	1	0	0	NP_000967.1
237649015	probable rRNA-processing protein EBP2 isoform 2 [Homo sapiens]	EBNA1BP2	-0.168123	0.89	1	0	0	NP_004777.1
6996014	histidyl-tRNA synthetase, cytoplasmic [Homo sapiens]	HARS	-0.166503	0.89	0	0	0	NP_001012996.1
13540594	VIP36-like protein isoform 2 [Homo sapiens]	LMAN2L	-0.166503	0.89	0	1	0	NP_612510.1
32307148	UDP-N-acetylglucosamine--peptide N-acetylglucosaminyltransferase 110 kDa subunit isoform 1 [Homo sapiens]	OGT	-0.166503	0.89	1	2	0	NP_000991.1
40316918	putative methyltransferase NSUN4 [Homo sapiens]	NSUN4	-0.164884	0.89	1	2	2	NP_056536.2
9910280	UDP-glucose:glycoprotein glucosyltransferase 1 precursor [Homo sapiens]	UGGT1	-0.164884	0.89	5	2	1	NP_006711.3
5901926	cleavage and polyadenylation specificity factor subunit 5 [Homo sapiens]	NUDT21	-0.164884	0.89	0	2	0	NP_055238.1
5902066	ribonuclease P protein subunit p14 [Homo sapiens]	RPP14	-0.164884	0.89	0	0	0	NP_006078.2
109240550	paraspeckle component 1 [Homo sapiens]	PSPC1	-0.164884	0.89	1	0	0	NP_001128181.1
4757988	probable cytosolic iron-sulfur protein assembly protein CIAO1 [Homo sapiens]	CIAO1	-0.163268	0.89	0	2	1	NP_001186731.1
227430303	CD109 antigen isoform 3 precursor [Homo sapiens]	CD109	-0.163268	0.89	1	1	1	NP_004334.1
51173717	actin-binding LIM protein 1 isoform s [Homo sapiens]	ABLIM1	-0.163268	0.89	0	1	0	NP_567823.1
55743075	angio-associated migratory cell protein [Homo sapiens]	AAMP	-0.163268	0.89	1	0	0	NP_001171588.1
67944630	60S ribosomal protein L9 [Homo sapiens]	RPL9	-0.161653	0.89	0	0	0	NP_002793.2
5454038	synaptonemal complex protein SC65 [Homo sapiens]	LEPREL4	-0.161653	0.89	0	2	0	NP_872589.1
55770900	ribosome biogenesis protein BRX1 homolog [Homo sapiens]	BRIX1	-0.161653	0.89	1	0	0	NP_079351.2
4506753	ruvB-like 1 [Homo sapiens]	RUVBL1	-0.158429	0.9	1	0	0	NP_444513.1
5454140	tumor susceptibility gene 101 protein [Homo sapiens]	TSG101	-0.15682	0.9	3	0	0	NP_055428.1
41327773	probable ATP-dependent RNA helicase DDX46 [Homo sapiens]	DDX46	-0.15682	0.9	1	2	0	NP_079480.2
4502419	flavin reductase [Homo sapiens]	BLVRB	-0.155213	0.9	0	0	0	NP_060864.1
7657218	bromodomain-containing protein 4 isoform short [Homo sapiens]	BRD4	-0.155213	0.9	2	2	1	NP_001027454.1
120433590	acyl-CoA-binding protein isoform 3 [Homo sapiens]	DBI	-0.153607	0.9	0	0	0	NP_005720.1
209862831	annexin A2 isoform 2 [Homo sapiens]	ANXA2	-0.153607	0.9	0	0	0	NP_009039.1
34147513	ras-related protein Rab-7a [Homo sapiens]	RAB7A	-0.153607	0.9	1	1	0	NP_000981.1
50838795	metastasis-associated protein MTA3 [Homo sapiens]	MTA3	-0.153607	0.9	1	0	0	NP_057417.3
147904340	WD repeat-containing protein 82 [Homo sapiens]	WDR82	-0.153607	0.9	1	0	0	NP_085131.1
157837979	mediator of RNA polymerase II transcription subunit 8 isoform 1 [Homo sapiens]	MED8	-0.153607	0.9	0	0	0	NP_004512.1
5031595	actin-related protein 2/3 complex subunit 4 isoform a [Homo sapiens]	ARPC4	-0.152003	0.9	0	0	0	NP_005040.2
16579885	60S ribosomal protein L4 [Homo sapiens]	RPL4	-0.152003	0.9	0	0	0	NP_004587.1
32455266	peroxiredoxin-1 [Homo sapiens]	PRDX1	-0.152003	0.9	0	0	0	NP_036377.1
4506613	60S ribosomal protein L22 proprotein [Homo sapiens]	RPL22	-0.152003	0.9	0	1	0	NP_005650.2
4557251	disintegrin and metalloproteinase domain-containing protein 10 precursor [Homo sapiens]	ADAM10	-0.152003	0.9	2	1	0	NP_002199.3
7705421	3-keto-steroid reductase [Homo sapiens]	HSD17B7	-0.152003	0.9	3	0	0	NP_976059.1
21361912	dnaJ homolog subfamily C member 1 precursor [Homo sapiens]	DNAJC1	-0.152003	0.9	1	0	0	NP_624358.2
145580578	C-terminal-binding protein 2 isoform 1 [Homo sapiens]	CTBP2	-0.152003	0.9	1	0	0	NP_002387.1
154937327	zinc finger protein 593 [Homo sapiens]	ZNF593	-0.152003	0.9	0	1	0	NP_620706.1
298566315	bifunctional UDP-N-acetylglucosamine 2-epimerase/N-acetylmannosamine kinase isoform 5 [Homo sapiens]	GNE	-0.152003	0.9	1	1	0	NP_037417.1
57242777	C-Myc-binding protein [Homo sapiens]	MYCBP	-0.150401	0.9	0	0	0	NP_036313.3
150417971	supervillin isoform 1 [Homo sapiens]	SVIL	-0.150401	0.9	0	0	0	NP_579899.1
4506019	serine/threonine-protein phosphatase 2A 55 kDa regulatory subunit B alpha isoform isoform 1 [Homo sapiens]	PPP2R2A	-0.150401	0.9	1	1	0	NP_001189414.1
21536326	heterogeneous nuclear ribonucleoprotein U-like protein 1 isoform a [Homo sapiens]	HNRNPUL1	-0.150401	0.9	1	0	0	NP_065134.1
38044290	zinc finger CCHC domain-containing protein 8 [Homo sapiens]	ZCCHC8	-0.150401	0.9	2	0	0	NP_003655.3
55743086	dolichyl-P-Man:Man(5)GlcNAc(2)-PP-dolichyl mannosyltransferase isoform d [Homo sapiens]	ALG3	-0.150401	0.9	2	0	0	NP_653259.3
6005942	transitional endoplasmic reticulum ATPase [Homo sapiens]	VCP	-0.148801	0.9	1	1	0	NP_001095868.1
11321583	succinyl-CoA ligase [ADP-forming] subunit beta, mitochondrial precursor [Homo sapiens]	SUCLA2	-0.148801	0.9	1	0	0	NP_001129294.1
54607033	integrin beta-4 isoform 3 precursor [Homo sapiens]	ITGB4	-0.148801	0.9	3	0	0	NP_003370.2
4506457	reticulocalbin-2 precursor [Homo sapiens]	RCN2	-0.147202	0.9	0	0	0	NP_071347.2
7705704	glutathione S-transferase kappa 1 isoform a [Homo sapiens]	GSTK1	-0.147202	0.9	0	0	0	NP_803173.1
10863977	U6 snRNA-associated Sm-like protein LSm2 [Homo sapiens]	LSM2	-0.147202	0.9	0	0	0	NP_078813.1
19923262	ras-related protein Rab-5A [Homo sapiens]	RAB5A	-0.147202	0.9	0	0	0	NP_002699.1
4502599	carbonyl reductase [NADPH] 1 [Homo sapiens]	CBR1	-0.147202	0.9	1	0	0	NP_054765.1
4506439	histone-binding protein RBBP7 isoform 2 [Homo sapiens]	RBBP7	-0.147202	0.9	1	0	0	NP_008846.2
38569505	probable ATP-dependent RNA helicase DDX52 [Homo sapiens]	DDX52	-0.147202	0.9	3	0	0	NP_006558.1
4758304	protein disulfide-isomerase A4 precursor [Homo sapiens]	PDIA4	-0.145605	0.9	1	0	0	NP_510869.1
33286418	pyruvate kinase isozymes M1/M2 isoform M2 [Homo sapiens]	PKM2	-0.145605	0.9	0	1	0	NP_112576.1
46275839	hypothetical protein LOC135154 precursor [Homo sapiens]	C6orf57	-0.145605	0.9	1	0	0	NP_001129969.1
63055043	transmembrane protein 205 [Homo sapiens]	TMEM205	-0.145605	0.9	0	0	0	NP_001014449.1
56549636	septin-2 [Homo sapiens]	2012-09-02	-0.14401	0.91	0	0	0	NP_001307.2
89026256	PREDICTED: actin-related protein 2/3 complex subunit 1B-like [Homo sapiens]	LOC653888	-0.14401	0.91	0	0	0	NP_000916.2
300244569	serine/arginine-rich splicing factor 11 isoform 2 [Homo sapiens]	SRSF11	-0.14401	0.91	0	0	0	NP_006383.2
300360534	glutathione S-transferase omega-1 isoform 3 [Homo sapiens]	GSTO1	-0.14401	0.91	0	0	0	NP_003082.1
14150100	nucleoside-triphosphatase C1orf57 [Homo sapiens]	NTPCR	-0.142417	0.91	0	0	0	NP_001186189.1
14150147	protein syndesmos isoform 1 [Homo sapiens]	NUDT16L1	-0.142417	0.91	0	0	0	NP_689520.2
20149304	pre-mRNA-splicing factor ISY1 homolog isoform 2 [Homo sapiens]	ISY1	-0.142417	0.91	0	0	0	NP_061915.2
189163485	lysosomal protective protein isoform b precursor [Homo sapiens]	CTSA	-0.142417	0.91	0	0	0	NP_005119.2
4503097	casein kinase II subunit alpha' [Homo sapiens]	CSNK2A2	-0.142417	0.91	0	1	0	NP_733821.1
14790190	msx2-interacting protein [Homo sapiens]	SPEN	-0.142417	0.91	3	0	0	NP_073616.6
16753205	ubiquilin-1 isoform 2 [Homo sapiens]	UBQLN1	-0.142417	0.91	2	0	0	NP_002797.3
209862837	epoxide hydrolase 1 [Homo sapiens]	EPHX1	-0.142417	0.91	2	0	0	NP_006139.1
21328448	14-3-3 protein beta/alpha [Homo sapiens]	YWHAB	-0.140826	0.91	0	0	0	NP_001377.1
156142199	histone-lysine N-methyltransferase, H3 lysine-9 specific 3 isoform b [Homo sapiens]	EHMT2	-0.140826	0.91	0	0	0	NP_612451.1
324120936	disks large homolog 1 isoform 3 [Homo sapiens]	DLG1	-0.140826	0.91	0	0	0	NP_443066.2
4505531	oxysterol-binding protein 1 [Homo sapiens]	OSBP	-0.140826	0.91	2	2	0	NP_004991.1
28872792	CDK5 regulatory subunit-associated protein 3 [Homo sapiens]	CDK5RAP3	-0.140826	0.91	1	1	0	NP_079170.2
41350333	tubulin-specific chaperone D [Homo sapiens]	TBCD	-0.140826	0.91	3	0	0	NP_056474.2
110681719	transmembrane protein C9orf5 [Homo sapiens]	C9orf5	-0.139236	0.91	0	0	0	NP_002785.1
4507401	transcription factor A, mitochondrial precursor [Homo sapiens]	TFAM	-0.139236	0.91	1	0	0	NP_940938.1
5031851	stathmin isoform a [Homo sapiens]	STMN1	-0.139236	0.91	2	1	0	NP_001029288.1
19924129	DNA repair protein RAD50 [Homo sapiens]	RAD50	-0.139236	0.91	6	0	0	NP_055115.1
110611228	utrophin [Homo sapiens]	UTRN	-0.139236	0.91	8	0	0	NP_004102.1
6912398	general transcription factor 3C polypeptide 3 [Homo sapiens]	GTF3C3	-0.137648	0.91	0	0	0	NP_065118.2
45827708	protein quaking isoform HQK-6 [Homo sapiens]	QKI	-0.137648	0.91	0	6	2	NP_068805.1
5453998	importin-7 [Homo sapiens]	IPO7	-0.137648	0.91	1	1	0	NP_055953.3
39777597	protein-glutamine gamma-glutamyltransferase 2 isoform a [Homo sapiens]	TGM2	-0.137648	0.91	2	0	0	NP_001366.1
39812378	ran-binding protein 9 [Homo sapiens]	RANBP9	-0.137648	0.91	1	0	0	NP_005076.3
41281656	CD99 antigen-like protein 2 isoform 3 precursor [Homo sapiens]	CD99L2	-0.137648	0.91	0	3	0	NP_573566.2
11095441	methylmalonate-semialdehyde dehydrogenase [acylating], mitochondrial precursor [Homo sapiens]	ALDH6A1	-0.136062	0.91	0	0	0	NP_036611.2
149999611	signal recognition particle 14 kDa protein [Homo sapiens]	SRP14	-0.136062	0.91	0	0	0	NP_001129704.1
5174613	nucleosome assembly protein 1-like 4 [Homo sapiens]	NAP1L4	-0.136062	0.91	2	0	0	NP_001006936.1
109255232	centrosomal protein of 170 kDa isoform gamma [Homo sapiens]	CEP170	-0.136062	0.91	2	0	0	NP_036382.2
166795299	solute carrier family 2, facilitated glucose transporter member 1 [Homo sapiens]	SLC2A1	-0.136062	0.91	2	2	0	NP_003081.2
4502277	sodium/potassium-transporting ATPase subunit beta-1 [Homo sapiens]	ATP1B1	-0.134477	0.91	0	0	0	NP_006563.2
4757900	calreticulin precursor [Homo sapiens]	CALR	-0.134477	0.91	0	0	0	NP_002806.2
115511049	guanine nucleotide-binding protein subunit alpha-11 [Homo sapiens]	GNA11	-0.134477	0.91	0	0	0	NP_057104.2
5902076	serine/arginine-rich splicing factor 1 isoform 1 [Homo sapiens]	SRSF1	-0.134477	0.91	1	3	0	NP_001093894.1
15011918	renin receptor [Homo sapiens]	ATP6AP2	-0.134477	0.91	1	0	0	NP_001180473.1
4885063	fructose-bisphosphate aldolase C [Homo sapiens]	ALDOC	-0.132894	0.91	0	0	0	NP_001030611.1
108773793	glucose-6-phosphate 1-dehydrogenase isoform b [Homo sapiens]	G6PD	-0.132894	0.91	0	0	0	NP_008973.1
221139764	PHD and RING finger domain-containing protein 1 [Homo sapiens]	PHRF1	-0.132894	0.91	0	0	0	NP_002403.2
6466450	catechol O-methyltransferase isoform S-COMT [Homo sapiens]	COMT	-0.132894	0.91	2	1	0	NP_001089.1
18105007	CAD protein [Homo sapiens]	CAD	-0.132894	0.91	3	1	0	NP_060571.1
21361657	protein disulfide-isomerase A3 precursor [Homo sapiens]	PDIA3	-0.132894	0.91	1	1	0	NP_004076.1
5803207	splicing factor U2AF 35 kDa subunit isoform a [Homo sapiens]	U2AF1	-0.131313	0.91	0	0	0	NP_001121134.1
51242945	striatin [Homo sapiens]	STRN	-0.131313	0.91	0	0	0	NP_055899.2
7705612	3'-5' exoribonuclease CSL4 homolog [Homo sapiens]	EXOSC1	-0.129734	0.91	0	0	0	NP_055464.1
5174655	reticulon-3 isoform a [Homo sapiens]	RTN3	-0.129734	0.91	0	1	0	NP_031390.1
7657455	pescadillo homolog [Homo sapiens]	PES1	-0.129734	0.91	0	1	0	NP_001182485.1
13273311	GDP-fucose protein O-fucosyltransferase 2 isoform A [Homo sapiens]	POFUT2	-0.129734	0.91	1	1	0	NP_001157947.1
31542656	probable ATP-dependent RNA helicase DDX49 [Homo sapiens]	DDX49	-0.129734	0.91	1	0	0	NP_001775.2
153945846	inositol 1,4,5-trisphosphate receptor type 3 [Homo sapiens]	ITPR3	-0.129734	0.91	2	1	0	NP_851385.1
4507677	endoplasmin precursor [Homo sapiens]	HSP90B1	-0.128156	0.92	0	0	0	NP_001032895.2
9624998	heterogeneous nuclear ribonucleoprotein H2 [Homo sapiens]	HNRNPH2	-0.128156	0.92	0	1	1	NP_001017371.3
4503301	2,4-dienoyl-CoA reductase, mitochondrial precursor [Homo sapiens]	DECR1	-0.128156	0.92	2	0	0	NP_008941.2
7019415	protein transport protein Sec61 subunit alpha isoform 1 [Homo sapiens]	SEC61A1	-0.128156	0.92	0	1	0	NP_055680.3
8393516	sterol-4-alpha-carboxylate 3-dehydrogenase, decarboxylating [Homo sapiens]	NSDHL	-0.128156	0.92	0	2	0	NP_005393.2
115387094	succinate dehydrogenase [ubiquinone] iron-sulfur subunit, mitochondrial precursor [Homo sapiens]	SDHB	-0.128156	0.92	1	0	0	NP_004654.1
4505587	platelet-activating factor acetylhydrolase IB subunit gamma [Homo sapiens]	PAFAH1B3	-0.12658	0.92	0	0	0	NP_055422.1
4758404	protein FRG1 [Homo sapiens]	FRG1	-0.12658	0.92	0	0	0	NP_004729.1
4502211	ADP-ribosylation factor 6 [Homo sapiens]	ARF6	-0.12658	0.92	0	6	1	NP_612402.1
75709220	cleavage stimulation factor subunit 1 [Homo sapiens]	CSTF1	-0.12658	0.92	1	0	0	NP_056155.1
197382758	heparan sulfate 2-O-sulfotransferase 1 isoform 2 [Homo sapiens]	HS2ST1	-0.12658	0.92	1	0	0	NP_000293.2
4503483	elongation factor 2 [Homo sapiens]	EEF2	-0.125006	0.92	2	0	0	XP_001129414.1
20149695	receptor expression-enhancing protein 4 [Homo sapiens]	REEP4	-0.125006	0.92	1	0	0	NP_005038.1
4506003	serine/threonine-protein phosphatase PP1-alpha catalytic subunit isoform 1 [Homo sapiens]	PPP1CA	-0.123434	0.92	0	0	0	NP_005325.2
9951915	adenosylhomocysteinase isoform 1 [Homo sapiens]	AHCY	-0.123434	0.92	0	0	0	NP_001121077.1
7705626	28S ribosomal protein S16, mitochondrial precursor [Homo sapiens]	MRPS16	-0.123434	0.92	0	1	0	NP_060708.1
16507237	78 kDa glucose-regulated protein precursor [Homo sapiens]	HSPA5	-0.123434	0.92	2	2	0	NP_110379.2
21359965	cleft lip and palate transmembrane protein 1-like protein [Homo sapiens]	CLPTM1L	-0.121863	0.92	0	0	0	NP_001161337.1
16933567	ras-related protein Rab-8A [Homo sapiens]	RAB8A	-0.121863	0.92	1	0	0	NP_009215.1
27436920	C-Jun-amino-terminal kinase-interacting protein 4 isoform 3 [Homo sapiens]	SPAG9	-0.121863	0.92	1	0	0	NP_004730.2
253970504	RNA-binding protein EWS isoform 4 [Homo sapiens]	EWSR1	-0.121863	0.92	1	0	0	NP_001137430.1
14249348	thioredoxin domain-containing protein 17 [Homo sapiens]	TXNDC17	-0.120294	0.92	0	0	0	NP_055488.1
64762484	lys-63-specific deubiquitinase BRCC36 isoform 2 [Homo sapiens]	BRCC3	-0.120294	0.92	0	0	0	NP_955391.1
193788629	testis-expressed sequence 264 protein precursor [Homo sapiens]	TEX264	-0.120294	0.92	0	0	0	NP_620141.1
50978624	gatC-like protein [Homo sapiens]	GATC	-0.120294	0.92	1	2	1	NP_569707.2
5032057	protein S100-A11 [Homo sapiens]	S100A11	-0.120294	0.92	1	0	0	NP_112196.3
5453994	double-strand-break repair protein rad21 homolog [Homo sapiens]	RAD21	-0.120294	0.92	1	0	0	NP_001157289.1
51873031	nicalin precursor [Homo sapiens]	NCLN	-0.120294	0.92	1	0	0	NP_001017977.1
54112121	splicing factor 3B subunit 3 [Homo sapiens]	SF3B3	-0.120294	0.92	4	2	0	NP_076970.1
223468687	rRNA-processing protein UTP23 homolog [Homo sapiens]	UTP23	-0.120294	0.92	0	2	0	NP_005660.4
21040371	ATP-dependent RNA helicase DDX39 isoform 1 [Homo sapiens]	DDX39A	-0.118727	0.92	0	0	0	NP_056485.2
39995084	integrator complex subunit 3 [Homo sapiens]	INTS3	-0.118727	0.92	0	0	0	NP_001340.2
302344762	non-specific lipid-transfer protein isoform 6 proprotein [Homo sapiens]	SCP2	-0.118727	0.92	0	0	0	NP_004695.1
16753227	60S ribosomal protein L6 [Homo sapiens]	RPL6	-0.118727	0.92	2	0	0	NP_006787.2
64085161	thyrotropin receptor isoform 2 precursor [Homo sapiens]	TSHR	-0.118727	0.92	1	0	0	NP_001185486.1
18379349	synaptic vesicle membrane protein VAT-1 homolog [Homo sapiens]	VAT1	-0.117161	0.92	0	0	0	NP_057736.4
70166599	tRNA pseudouridine synthase A, mitochondrial isoform 2 [Homo sapiens]	PUS1	-0.117161	0.92	0	0	0	NP_006419.2
8922794	U3 small nucleolar ribonucleoprotein protein IMP3 [Homo sapiens]	IMP3	-0.117161	0.92	0	1	1	NP_056238.2
4759274	thioredoxin-like protein 1 [Homo sapiens]	TXNL1	-0.117161	0.92	0	1	0	NP_001070865.1
6598323	rab GDP dissociation inhibitor beta isoform 1 [Homo sapiens]	GDI2	-0.117161	0.92	1	0	0	NP_005825.1
14150149	hypothetical protein LOC84310 [Homo sapiens]	C7orf50	-0.117161	0.92	1	0	0	NP_056083.3
51599151	calpain small subunit 1 [Homo sapiens]	CAPNS1	-0.117161	0.92	1	1	0	NP_000301.1
117676384	SRSF2-interacting protein [Homo sapiens]	SCAF11	-0.117161	0.92	1	1	0	NP_115544.1
156523968	poly [ADP-ribose] polymerase 1 [Homo sapiens]	PARP1	-0.117161	0.92	2	0	0	NP_057126.2
215983058	magnesium transporter protein 1 [Homo sapiens]	MAGT1	-0.117161	0.92	1	2	0	NP_065965.4
5729953	nuclear migration protein nudC [Homo sapiens]	NUDC	-0.115597	0.92	0	0	0	NP_112243.1
7661788	mediator of RNA polymerase II transcription subunit 4 [Homo sapiens]	MED4	-0.115597	0.92	0	0	0	NP_001182572.1
27501446	density-regulated protein [Homo sapiens]	DENR	-0.115597	0.92	0	0	0	NP_003338.1
4501859	short/branched chain specific acyl-CoA dehydrogenase, mitochondrial precursor [Homo sapiens]	ACADSB	-0.115597	0.92	0	2	0	NP_060117.3
4505941	DNA-directed RNA polymerase II subunit RPB2 [Homo sapiens]	POLR2B	-0.115597	0.92	2	0	0	NP_003133.1
4557361	BH3-interacting domain death agonist isoform 2 [Homo sapiens]	BID	-0.115597	0.92	0	1	0	NP_078937.3
4757768	rho GDP-dissociation inhibitor 1 isoform a [Homo sapiens]	ARHGDIA	-0.115597	0.92	1	0	0	NP_001410.2
40805862	tumor protein D54 isoform f [Homo sapiens]	TPD52L2	-0.114035	0.92	0	0	0	NP_006038.2
13236528	fukutin-related protein [Homo sapiens]	FKRP	-0.114035	0.92	0	0	0	NP_001027464.1
15811782	G patch domain and KOW motifs-containing protein [Homo sapiens]	GPKOW	-0.114035	0.92	1	2	0	NP_919415.2
98986457	host cell factor 1 [Homo sapiens]	HCFC1	-0.114035	0.92	2	0	0	NP_001191184.1
118600965	hexaprenyldihydroxybenzoate methyltransferase, mitochondrial [Homo sapiens]	COQ3	-0.112475	0.93	0	0	0	NP_005848.2
189083772	gelsolin isoform b [Homo sapiens]	GSN	-0.112475	0.93	0	0	0	NP_001186746.1
5453565	brain-specific angiogenesis inhibitor 1-associated protein 2 isoform 3 [Homo sapiens]	BAIAP2	-0.112475	0.93	0	1	0	XP_003118895.1
10518503	coagulation factor VII isoform b precursor [Homo sapiens]	F7	-0.112475	0.93	1	0	0	NP_001748.1
10863925	DNA-directed RNA polymerases I, II, and III subunit RPABC5 [Homo sapiens]	POLR2L	-0.112475	0.93	0	1	0	NP_148980.2
29029601	probable ATP-dependent RNA helicase DHX37 [Homo sapiens]	DHX37	-0.112475	0.93	1	1	0	NP_057141.1
41152097	A-kinase anchor protein 17A isoform 1 [Homo sapiens]	AKAP17A	-0.112475	0.93	1	0	0	NP_054797.2
47458820	signal transducer and activator of transcription 3 isoform 3 [Homo sapiens]	STAT3	-0.112475	0.93	3	0	0	NP_001370.1
19923403	exosome complex exonuclease RRP4 [Homo sapiens]	EXOSC2	-0.110916	0.93	0	0	0	NP_002568.2
4557797	nucleoside diphosphate kinase A isoform b [Homo sapiens]	NME1	-0.110916	0.93	1	0	0	NP_055066.1
55770895	protein LAP2 isoform 7 [Homo sapiens]	ERBB2IP	-0.110916	0.93	3	0	0	NP_001422.1
166795301	prenylcysteine oxidase 1 precursor [Homo sapiens]	PCYOX1	-0.110916	0.93	0	1	0	NP_006829.1
5031753	heterogeneous nuclear ribonucleoprotein H [Homo sapiens]	HNRNPH1	-0.109359	0.93	0	0	0	NP_005339.3
11342676	cdc42-interacting protein 4 [Homo sapiens]	TRIP10	-0.109359	0.93	0	0	0	NP_001127964.1
73622130	BolA-like protein 2 [Homo sapiens]	BOLA2	-0.109359	0.93	0	0	0	NP_612114.1
165905589	LIM domain and actin-binding protein 1 isoform a [Homo sapiens]	LIMA1	-0.109359	0.93	0	0	0	NP_065883.1
192807336	serrate RNA effector molecule homolog isoform e [Homo sapiens]	SRRT	-0.109359	0.93	0	0	0	NP_006775.1
4826686	ATP-dependent RNA helicase DDX1 [Homo sapiens]	DDX1	-0.109359	0.93	1	0	0	XP_941344.1
11545863	methylcrotonoyl-CoA carboxylase beta chain, mitochondrial [Homo sapiens]	MCCC2	-0.109359	0.93	1	1	0	NP_079425.3
17505907	probable ATP-dependent RNA helicase DDX31 isoform 1 [Homo sapiens]	DDX31	-0.107803	0.93	0	1	1	NP_004332.2
33350932	cytoplasmic dynein 1 heavy chain 1 [Homo sapiens]	DYNC1H1	-0.107803	0.93	5	0	0	NP_001122320.1
4503817	3-ketodihydrosphingosine reductase precursor [Homo sapiens]	KDSR	-0.106249	0.93	0	0	0	NP_002781.2
7657315	U6 snRNA-associated Sm-like protein LSm3 [Homo sapiens]	LSM3	-0.106249	0.93	0	0	0	NP_062543.1
41327771	probable ATP-dependent RNA helicase DDX23 [Homo sapiens]	DDX23	-0.106249	0.93	0	0	0	NP_003840.2
31543091	protein MAK16 homolog [Homo sapiens]	MAK16	-0.106249	0.93	4	1	1	NP_055870.2
4502709	cyclin-dependent kinase 1 isoform 1 [Homo sapiens]	CDK1	-0.104697	0.93	0	0	0	NP_077027.1
7706029	hypothetical protein LOC51250 isoform a [Homo sapiens]	C6orf203	-0.104697	0.93	0	0	0	NP_112487.1
8392875	transcription factor IIB [Homo sapiens]	C16orf80	-0.104697	0.93	0	0	0	NP_001009.1
165377209	probable S-adenosyl-L-methionine-dependent methyltransferase METT5D1 isoform 1 [Homo sapiens]	METTL15	-0.104697	0.93	0	2	0	NP_004879.1
13491174	MARCKS-related protein [Homo sapiens]	MARCKSL1	-0.103147	0.93	0	0	0	NP_940852.3
27735037	membrane magnesium transporter 1 precursor [Homo sapiens]	MMGT1	-0.103147	0.93	0	0	0	NP_803190.2
209862867	poly(U)-binding-splicing factor PUF60 isoform c [Homo sapiens]	PUF60	-0.103147	0.93	0	0	0	NP_002262.3
164519076	transmembrane 9 superfamily member 4 precursor [Homo sapiens]	TM9SF4	-0.103147	0.93	0	1	1	NP_056515.2
5803013	endoplasmic reticulum resident protein 29 isoform 1 precursor [Homo sapiens]	ERP29	-0.101598	0.93	0	0	0	NP_001002.1
16554627	WD repeat-containing protein 5 [Homo sapiens]	WDR5	-0.101598	0.93	0	0	0	NP_031388.2
21735625	14-3-3 protein zeta/delta [Homo sapiens]	YWHAZ	-0.101598	0.93	0	0	0	NP_057174.1
42822868	ribonuclease inhibitor [Homo sapiens]	RNH1	-0.101598	0.93	0	0	0	NP_060700.2
71773201	adenine phosphoribosyltransferase isoform b [Homo sapiens]	APRT	-0.101598	0.93	0	0	0	NP_001129074.1
160948599	integrator complex subunit 1 [Homo sapiens]	INTS1	-0.101598	0.93	0	0	0	NP_001805.3
33519430	thioredoxin reductase 1, cytoplasmic isoform 2 [Homo sapiens]	TXNRD1	-0.101598	0.93	1	0	0	NP_001014446.1
30578410	dolichyl-diphosphooligosaccharide--protein glycosyltransferase subunit STT3B [Homo sapiens]	STT3B	-0.100051	0.93	0	0	0	NP_056982.1
224589127	transmembrane protein 33 [Homo sapiens]	TMEM33	-0.100051	0.93	1	1	1	NP_001034708.1
283135173	RNA-binding protein FUS isoform 3 [Homo sapiens]	FUS	-0.100051	0.93	1	1	1	NP_065797.2
110815813	ankyrin repeat and FYVE domain-containing protein 1 isoform 1 [Homo sapiens]	ANKFY1	-0.100051	0.93	1	4	0	NP_001030178.1
17986258	myosin light polypeptide 6 isoform 1 [Homo sapiens]	MYL6	-0.0985055	0.93	0	0	0	NP_004362.2
195976782	RNA polymerase-associated protein RTF1 homolog [Homo sapiens]	RTF1	-0.0985055	0.93	0	0	0	NP_003371.2
269846910	non-structural maintenance of chromosomes element 4 homolog A isoform 2 [Homo sapiens]	NSMCE4A	-0.0985055	0.93	0	0	0	NP_003283.2
194306571	replication factor C subunit 5 isoform 2 [Homo sapiens]	RFC5	-0.0985055	0.93	1	0	0	NP_001164608.1
4504183	glutathione S-transferase P [Homo sapiens]	GSTP1	-0.0969617	0.94	0	0	0	NP_054817.2
47132587	protein kinase C delta-binding protein [Homo sapiens]	PRKCDBP	-0.0969617	0.94	0	0	0	NP_002047.2
4506787	ras GTPase-activating-like protein IQGAP1 [Homo sapiens]	IQGAP1	-0.0969617	0.94	1	0	0	NP_004732.2
50593025	NFU1 iron-sulfur cluster scaffold homolog, mitochondrial isoform 1 [Homo sapiens]	NFU1	-0.0969617	0.94	1	0	0	NP_004799.1
89274169	anamorsin [Homo sapiens]	CIAPIN1	-0.0969617	0.94	1	0	0	NP_005708.1
118498352	M-phase phosphoprotein 6 [Homo sapiens]	MPHOSPH6	-0.0969617	0.94	1	0	0	NP_006280.3
4557469	AP-2 complex subunit beta isoform b [Homo sapiens]	AP2B1	-0.0954196	0.94	0	2	1	NP_001605.1
51094101	ATP-dependent RNA helicase DDX54 isoform 2 [Homo sapiens]	DDX54	-0.0954196	0.94	0	4	1	NP_067072.3
26638659	39S ribosomal protein L40, mitochondrial precursor [Homo sapiens]	MRPL40	-0.0954196	0.94	2	0	0	NP_036533.2
4507669	translationally-controlled tumor protein [Homo sapiens]	TPT1	-0.093879	0.94	0	0	0	NP_443069.1
5031985	nuclear transport factor 2 [Homo sapiens]	NUTF2	-0.093879	0.94	0	0	0	NP_036222.3
20270367	MMP37-like protein, mitochondrial precursor [Homo sapiens]	C3orf31	-0.093879	0.94	0	0	0	NP_149022.3
4759046	DNA-directed RNA polymerases I and III subunit RPAC1 isoform 2 [Homo sapiens]	POLR1C	-0.093879	0.94	1	0	0	NP_036448.1
209869993	trifunctional purine biosynthetic protein adenosine-3 isoform 1 [Homo sapiens]	GART	-0.093879	0.94	2	0	0	NP_036457.1
6857818	nucleoplasmin-3 [Homo sapiens]	NPM3	-0.0923402	0.94	0	0	0	NP_001161971.1
164519146	transcriptional repressor p66-alpha [Homo sapiens]	GATAD2A	-0.0908029	0.94	3	1	1	NP_057251.2
223555917	protein LYRIC [Homo sapiens]	MTDH	-0.0908029	0.94	1	3	1	NP_002815.3
145699123	dedicator of cytokinesis protein 11 [Homo sapiens]	DOCK11	-0.0908029	0.94	1	0	0	NP_001081.1
171846268	elongation factor Ts, mitochondrial isoform 2 precursor [Homo sapiens]	TSFM	-0.0908029	0.94	0	1	0	NP_001907.2
213511012	B-cell receptor-associated protein 31 isoform b [Homo sapiens]	BCAP31	-0.0908029	0.94	0	1	0	NP_001164408.1
7706326	pre-mRNA branch site protein p14 [Homo sapiens]	SF3B14	-0.0892673	0.94	0	0	0	NP_001180529.1
255918200	serine/threonine-protein phosphatase 6 regulatory subunit 3 isoform 3 [Homo sapiens]	PPP6R3	-0.0892673	0.94	0	0	0	NP_060197.4
310109922	PREDICTED: aldo-keto reductase family 1 member C2-like isoform 2 [Homo sapiens]	LOC100508006	-0.0892673	0.94	0	0	0	XP_003120185.1
4759012	ras-related protein Rab-9A [Homo sapiens]	RAB9A	-0.0892673	0.94	1	0	0	NP_004272.2
55770888	early endosome antigen 1 [Homo sapiens]	EEA1	-0.0892673	0.94	1	1	0	NP_055203.4
55956788	nucleolin [Homo sapiens]	NCL	-0.0892673	0.94	1	1	0	NP_000975.2
72534684	phospholipase D3 [Homo sapiens]	PLD3	-0.0892673	0.94	1	0	0	NP_003555.1
189083851	lysosomal acid lipase/cholesteryl ester hydrolase precursor [Homo sapiens]	LIPA	-0.0892673	0.94	1	0	0	NP_001123585.1
226497734	probable RNA-binding protein 19 [Homo sapiens]	RBM19	-0.0892673	0.94	2	1	0	NP_660310.2
32483357	dehydrogenase/reductase SDR family member 4 [Homo sapiens]	DHRS4	-0.0877334	0.94	0	0	0	NP_000091.1
32528286	cytosolic acyl coenzyme A thioester hydrolase isoform hBACHd [Homo sapiens]	ACOT7	-0.0877334	0.94	0	0	0	NP_001008389.1
56676371	cleavage and polyadenylation specificity factor subunit 1 [Homo sapiens]	CPSF1	-0.0877334	0.94	0	0	0	NP_003375.1
208022622	ubiquitin-40S ribosomal protein S27a precursor [Homo sapiens]	RPS27A	-0.0877334	0.94	0	0	0	NP_783161.1
7549793	transducin beta-like protein 2 [Homo sapiens]	TBL2	-0.086201	0.94	0	0	0	NP_057654.2
14211923	histidine triad nucleotide-binding protein 2, mitochondrial precursor [Homo sapiens]	HINT2	-0.086201	0.94	0	0	0	NP_055842.2
76496472	60S ribosomal protein L3 isoform b [Homo sapiens]	RPL3	-0.086201	0.94	0	0	0	NP_115604.1
21361399	serine/threonine-protein phosphatase 2A 65 kDa regulatory subunit A alpha isoform [Homo sapiens]	PPP2R1A	-0.086201	0.94	0	1	0	NP_004068.2
22208967	high mobility group protein HMG-I/HMG-Y isoform a [Homo sapiens]	HMGA1	-0.086201	0.94	1	2	0	NP_001093097.1
18644734	beta-catenin-like protein 1 [Homo sapiens]	CTNNBL1	-0.0846703	0.94	0	0	0	NP_001011649.1
221307584	prohibitin-2 isoform 1 [Homo sapiens]	PHB2	-0.0846703	0.94	0	0	0	NP_001005.1
260654708	hydroxymethylglutaryl-CoA lyase, mitochondrial isoform 2 precursor [Homo sapiens]	HMGCL	-0.0846703	0.94	0	0	0	NP_114368.1
7705618	39S ribosomal protein L11, mitochondrial isoform a [Homo sapiens]	MRPL11	-0.0831412	0.94	0	0	0	NP_001035521.1
41152086	serpin B6 [Homo sapiens]	SERPINB6	-0.0831412	0.94	0	0	0	NP_071446.2
156415992	dimethyladenosine transferase 1, mitochondrial [Homo sapiens]	TFB1M	-0.0831412	0.94	0	0	0	NP_001002019.1
4506903	serine/arginine-rich splicing factor 9 [Homo sapiens]	SRSF9	-0.0831412	0.94	1	0	0	NP_001072992.1
4758012	clathrin heavy chain 1 [Homo sapiens]	CLTC	-0.0831412	0.94	1	2	0	NP_001145.1
18860847	menin isoform 2 [Homo sapiens]	MEN1	-0.0831412	0.94	1	0	0	NP_835227.1
23510381	transportin-1 isoform 2 [Homo sapiens]	TNPO1	-0.0831412	0.94	2	1	0	NP_006079.1
118402586	lactoylglutathione lyase [Homo sapiens]	GLO1	-0.0831412	0.94	2	0	0	NP_060616.1
7657532	protein S100-A6 [Homo sapiens]	S100A6	-0.0816138	0.95	0	0	0	NP_002145.3
11321601	6-phosphofructokinase type C [Homo sapiens]	PFKP	-0.0816138	0.95	0	0	0	NP_060740.1
54112429	dedicator of cytokinesis protein 7 [Homo sapiens]	DOCK7	-0.0816138	0.95	0	0	0	NP_001078880.1
115527088	transmembrane and ubiquitin-like domain-containing protein 2 isoform a [Homo sapiens]	TMUB2	-0.0816138	0.95	0	0	0	NP_057485.2
4503243	lanosterol 14-alpha demethylase isoform 1 [Homo sapiens]	CYP51A1	-0.0816138	0.95	0	1	0	NP_001036816.1
10716563	calnexin precursor [Homo sapiens]	CANX	-0.0800879	0.95	0	0	0	NP_037518.3
4557817	succinyl-CoA:3-ketoacid-coenzyme A transferase 1, mitochondrial precursor [Homo sapiens]	OXCT1	-0.0800879	0.95	3	0	0	NP_009055.2
20127499	serine/arginine-rich splicing factor 6 [Homo sapiens]	SRSF6	-0.0800879	0.95	1	2	0	NP_859052.3
24308324	fatty acyl-CoA reductase 1 [Homo sapiens]	FAR1	-0.0800879	0.95	2	1	0	NP_001138586.1
4758208	dual specificity protein phosphatase 3 [Homo sapiens]	DUSP3	-0.0785637	0.95	0	0	0	NP_003479.1
11321607	thyroid receptor-interacting protein 13 isoform 1 [Homo sapiens]	TRIP13	-0.0785637	0.95	1	0	0	NP_001022.1
157388904	HEAT repeat-containing protein 2 [Homo sapiens]	HEATR2	-0.077041	0.95	2	0	0	NP_077005.2
157426879	nuclear protein localization protein 4 homolog [Homo sapiens]	NPLOC4	-0.077041	0.95	2	1	0	NP_059990.2
190341110	cyclin-Y isoform 2 [Homo sapiens]	CCNY	-0.077041	0.95	1	0	0	NP_958431.2
15147219	transcriptional activator protein Pur-beta [Homo sapiens]	PURB	-0.07552	0.95	0	2	0	NP_004569.2
4557303	fatty aldehyde dehydrogenase isoform 2 [Homo sapiens]	ALDH3A2	-0.0740006	0.95	0	0	0	NP_057049.5
5032215	ribonuclease UK114 [Homo sapiens]	HRSP12	-0.0740006	0.95	0	0	0	NP_001001.2
7706497	UMP-CMP kinase isoform a [Homo sapiens]	CMPK1	-0.0740006	0.95	0	1	0	NP_056110.2
32189371	transmembrane protein 165 [Homo sapiens]	TMEM165	-0.0740006	0.95	1	0	0	NP_003592.2
55769587	nucleolar protein 14 [Homo sapiens]	NOP14	-0.0740006	0.95	1	0	0	NP_006132.1
21361497	acyl-CoA dehydrogenase family member 9, mitochondrial precursor [Homo sapiens]	ACAD9	-0.0724828	0.95	0	0	0	NP_003161.2
154426312	SPATS2-like protein isoform b [Homo sapiens]	SPATS2L	-0.0724828	0.95	0	0	0	NP_002892.1
6912396	glyoxylate reductase/hydroxypyruvate reductase [Homo sapiens]	GRHPR	-0.0724828	0.95	1	0	0	NP_075384.3
55749769	pre-mRNA-splicing factor CWC22 homolog [Homo sapiens]	CWC22	-0.0724828	0.95	0	1	0	NP_001427.2
189083688	exosome complex exonuclease RRP42 [Homo sapiens]	EXOSC7	-0.0709665	0.95	0	0	0	NP_775741.1
7706425	N-alpha-acetyltransferase 38, NatC auxiliary subunit [Homo sapiens]	NAA38	-0.0709665	0.95	0	5	0	NP_004426.2
11056044	inorganic pyrophosphatase [Homo sapiens]	PPA1	-0.0709665	0.95	1	0	0	NP_071381.1
26051237	nucleoporin p54 [Homo sapiens]	NUP54	-0.0709665	0.95	2	0	0	NP_002990.2
38201710	probable ATP-dependent RNA helicase DDX17 isoform 1 [Homo sapiens]	DDX17	-0.0709665	0.95	0	1	0	NP_001138898.1
62198235	drebrin-like protein isoform b [Homo sapiens]	DBNL	-0.0709665	0.95	1	0	0	NP_001939.1
192448443	peptidyl-prolyl cis-trans isomerase FKBP10 precursor [Homo sapiens]	FKBP10	-0.0709665	0.95	1	0	0	NP_003583.2
4503571	alpha-enolase isoform 1 [Homo sapiens]	ENO1	-0.0694519	0.95	0	0	0	NP_004721.1
6005721	erlin-2 isoform 1 [Homo sapiens]	ERLIN2	-0.0694519	0.95	0	0	0	NP_001155056.1
189027129	2',5'-phosphodiesterase 12 [Homo sapiens]	PDE12	-0.0694519	0.95	0	0	0	NP_001077415.1
260763926	cytosolic 5'-nucleotidase 3 isoform 3 [Homo sapiens]	NT5C3	-0.0694519	0.95	0	2	0	NP_064551.3
7661910	tetratricopeptide repeat protein 35 [Homo sapiens]	TTC35	-0.0679388	0.95	0	0	0	NP_001092872.1
12597631	hypothetical protein LOC64897 [Homo sapiens]	C12orf43	-0.0679388	0.95	0	0	0	NP_055995.4
57863269	ribosomal RNA processing protein 1 homolog B [Homo sapiens]	RRP1B	-0.0679388	0.95	0	0	0	NP_001159757.1
4501993	alkyldihydroxyacetonephosphate synthase, peroxisomal precursor [Homo sapiens]	AGPS	-0.0679388	0.95	0	1	0	NP_001013269.1
10863903	probable E3 ubiquitin-protein ligase TRIP12 [Homo sapiens]	TRIP12	-0.0679388	0.95	3	0	0	NP_065076.2
203098013	all-trans-retinol 13,14-reductase precursor [Homo sapiens]	RETSAT	-0.0679388	0.95	1	0	0	NP_060286.1
4503143	cathepsin D preproprotein [Homo sapiens]	CTSD	-0.0664274	0.96	0	0	0	NP_758436.1
21361282	serine/arginine-rich splicing factor 4 [Homo sapiens]	SRSF4	-0.0664274	0.96	0	0	0	NP_005859.1
33188463	28S ribosomal protein S9, mitochondrial precursor [Homo sapiens]	MRPS9	-0.0664274	0.96	0	0	0	NP_004242.1
314122224	anion exchange protein 2 isoform 3 [Homo sapiens]	SLC4A2	-0.0664274	0.96	0	0	0	NP_001135828.1
206597509	arf-GAP domain and FG repeats-containing protein 1 isoform 4 [Homo sapiens]	AGFG1	-0.0664274	0.96	0	4	1	NP_001018171.1
25777671	serine/threonine-protein phosphatase 1 regulatory subunit 10 [Homo sapiens]	PPP1R10	-0.0664274	0.96	2	1	0	NP_002477.1
45643125	nuclear valosin-containing protein-like isoform 2 [Homo sapiens]	NVL	-0.0664274	0.96	1	0	0	NP_002905.2
67078406	trans-2-enoyl-CoA reductase, mitochondrial isoform b [Homo sapiens]	MECR	-0.0664274	0.96	0	1	0	NP_976324.2
189083844	dipeptidyl peptidase 1 isoform a preproprotein [Homo sapiens]	CTSC	-0.0664274	0.96	2	0	0	NP_055571.2
310131980	PREDICTED: 3-hydroxyacyl-CoA dehydratase 3-like isoform 1 [Homo sapiens]	LOC100291405	-0.0649175	0.96	0	0	0	NP_001032238.1
302699211	pogo transposable element with ZNF domain isoform 3 [Homo sapiens]	POGZ	-0.0649175	0.96	0	1	1	NP_002877.2
7657609	signal peptidase complex catalytic subunit SEC11A [Homo sapiens]	SEC11A	-0.0649175	0.96	1	1	0	NP_037374.1
7706339	peptidyl-prolyl cis-trans isomerase-like 1 [Homo sapiens]	PPIL1	-0.0649175	0.96	1	0	0	NP_006747.1
32307144	procollagen-lysine,2-oxoglutarate 5-dioxygenase 1 precursor [Homo sapiens]	PLOD1	-0.0649175	0.96	2	1	0	NP_001138632.1
33469966	sec1 family domain-containing protein 1 isoform a [Homo sapiens]	SCFD1	-0.0649175	0.96	2	0	0	NP_005122.2
48255891	glucosidase 2 subunit beta isoform 2 [Homo sapiens]	PRKCSH	-0.0649175	0.96	1	0	0	NP_954653.1
151301228	pre-mRNA-processing factor 40 homolog A [Homo sapiens]	PRPF40A	-0.0649175	0.96	3	0	0	NP_006532.2
214010175	CLIP-associating protein 1 isoform 3 [Homo sapiens]	CLASP1	-0.0649175	0.96	1	2	0	NP_000987.2
255652953	zinc finger CCCH domain-containing protein 18 [Homo sapiens]	ZC3H18	-0.0649175	0.96	0	1	0	NP_059133.1
4557415	cystathionine beta-synthase [Homo sapiens]	CBS	-0.0634092	0.96	0	0	0	NP_001032406.1
83267866	dynein light chain 1, cytoplasmic [Homo sapiens]	DYNLL1	-0.0634092	0.96	0	0	0	XP_002347581.2
157694511	nucleolar complex protein 2 homolog [Homo sapiens]	NOC2L	-0.0634092	0.96	0	0	0	NP_060548.2
4507217	signal recognition particle 9 kDa protein isoform 2 [Homo sapiens]	SRP9	-0.0634092	0.96	0	1	0	NP_001120968.1
22095331	hypothetical protein LOC23065 precursor [Homo sapiens]	KIAA0090	-0.0634092	0.96	2	0	0	NP_005334.1
34577063	adenylosuccinate synthetase isozyme 2 [Homo sapiens]	ADSS	-0.0634092	0.96	1	0	0	NP_001139247.1
14249382	abhydrolase domain-containing protein 14B [Homo sapiens]	ABHD14B	-0.0619024	0.96	0	0	0	NP_004478.3
31712030	ancient ubiquitous protein 1 [Homo sapiens]	AUP1	-0.0619024	0.96	0	0	0	NP_006378.3
4758876	polyadenylate-binding protein 2 [Homo sapiens]	PABPN1	-0.0619024	0.96	1	0	0	NP_001107869.1
157817073	cyclin-dependent kinase 12 isoform 2 [Homo sapiens]	CDK12	-0.0619024	0.96	1	0	0	NP_067075.1
4507903	serine/threonine-protein kinase VRK1 [Homo sapiens]	VRK1	-0.0603973	0.96	0	0	0	NP_001028694.1
4557317	annexin A11 [Homo sapiens]	ANXA11	-0.0603973	0.96	0	0	0	NP_036205.1
5031635	cofilin-1 [Homo sapiens]	CFL1	-0.0603973	0.96	0	0	0	NP_000174.1
5730085	dynein light chain Tctex-type 1 [Homo sapiens]	DYNLT1	-0.0603973	0.96	0	0	0	NP_065843.3
4557471	AP-1 complex subunit sigma-1A [Homo sapiens]	AP1S1	-0.0603973	0.96	1	0	0	NP_001006.1
5453832	hypoxia up-regulated protein 1 precursor [Homo sapiens]	HYOU1	-0.0603973	0.96	1	0	0	NP_037465.2
77812670	exosome complex exonuclease RRP45 isoform 2 [Homo sapiens]	EXOSC9	-0.0603973	0.96	1	0	0	NP_877725.1
5802966	destrin isoform a [Homo sapiens]	DSTN	-0.0588937	0.96	0	0	0	NP_001004.2
21361884	ras-related protein Rab-2B isoform 1 [Homo sapiens]	RAB2B	-0.0588937	0.96	0	0	0	NP_004308.2
31377697	procollagen galactosyltransferase 1 precursor [Homo sapiens]	GLT25D1	-0.0588937	0.96	2	0	0	NP_003128.3
148747556	PIN2/TERF1-interacting telomerase inhibitor 1 [Homo sapiens]	PINX1	-0.0588937	0.96	1	0	0	NP_110517.2
5174764	metallothionein-2 [Homo sapiens]	MT2A	-0.0573917	0.96	0	0	0	NP_002374.2
38788260	nucleosome-remodeling factor subunit BPTF isoform 2 [Homo sapiens]	BPTF	-0.0573917	0.96	0	0	0	NP_004701.1
110347461	myc-associated zinc finger protein isoform 1 [Homo sapiens]	MAZ	-0.0573917	0.96	0	0	0	NP_006808.1
148612885	ADP-ribosylation factor-like protein 2 isoform 1 [Homo sapiens]	ARL2	-0.0573917	0.96	0	0	0	NP_001137533.1
19913424	V-type proton ATPase catalytic subunit A [Homo sapiens]	ATP6V1A	-0.0573917	0.96	1	0	0	NP_002026.1
24797067	HLA class I histocompatibility antigen, A-1 alpha chain precursor [Homo sapiens]	HLA-A	-0.0573917	0.96	1	0	0	NP_062562.1
48762934	collagen alpha-2(I) chain precursor [Homo sapiens]	COL1A2	-0.0573917	0.96	3	0	0	NP_003343.1
260656039	neuropathy target esterase isoform c [Homo sapiens]	PNPLA6	-0.0573917	0.96	3	1	0	NP_000115.1
4506031	palmitoyl-protein thioesterase 1 isoform 1 precursor [Homo sapiens]	PPT1	-0.0558912	0.96	0	0	0	NP_005588.2
4506765	protein S100-A4 [Homo sapiens]	S100A4	-0.0558912	0.96	0	0	0	NP_954659.1
24430135	dolichol-phosphate mannosyltransferase subunit 3 isoform 2 [Homo sapiens]	DPM3	-0.0558912	0.96	0	0	0	NP_005337.2
5174615	neighbor of COX4 isoform 1 [Homo sapiens]	COX4NB	-0.0558912	0.96	1	0	0	NP_001023.1
42734438	hypothetical protein LOC51571 [Homo sapiens]	FAM49B	-0.0558912	0.96	0	0	0	NP_003970.1
110611220	ribosome-binding protein 1 [Homo sapiens]	RRBP1	-0.0558912	0.96	1	1	0	NP_006321.1
188035910	chromobox protein homolog 5 [Homo sapiens]	CBX5	-0.0558912	0.96	1	4	0	NP_001035009.1
4504067	aspartate aminotransferase, cytoplasmic [Homo sapiens]	GOT1	-0.0543923	0.96	0	0	0	NP_055635.3
299523086	mesencephalic astrocyte-derived neurotrophic factor precursor [Homo sapiens]	MANF	-0.0543923	0.96	0	0	0	NP_919424.1
4758274	protein 4.1 isoform 6 [Homo sapiens]	EPB41	-0.0543923	0.96	0	1	0	NP_057688.2
170016077	probable cation-transporting ATPase 13A1 [Homo sapiens]	ATP13A1	-0.0543923	0.96	1	0	0	NP_001127949.1
4507729	tubulin beta-2A chain [Homo sapiens]	TUBB2A	-0.0528949	0.96	0	0	0	NP_060855.2
11024700	mitochondrial import inner membrane translocase subunit Tim13 [Homo sapiens]	TIMM13	-0.0528949	0.96	0	0	0	NP_660298.2
27734709	nodal modulator 2 isoform 2 [Homo sapiens]	NOMO2	-0.0528949	0.96	0	0	0	NP_006187.2
21361602	sodium-coupled neutral amino acid transporter 2 [Homo sapiens]	SLC38A2	-0.0528949	0.96	2	3	1	NP_001285.1
58761546	lysine-specific histone demethylase 1A isoform b [Homo sapiens]	KDM1A	-0.0528949	0.96	1	0	0	NP_116145.1
87162455	hypothetical protein LOC23277 [Homo sapiens]	KIAA0664	-0.0528949	0.96	2	0	0	XP_003119132.1
260898763	RNA-binding protein 28 isoform 2 [Homo sapiens]	RBM28	-0.0528949	0.96	1	0	0	NP_055814.1
4826649	39S ribosomal protein L49, mitochondrial [Homo sapiens]	MRPL49	-0.0513992	0.97	0	0	0	NP_037460.2
40789233	ubiquinone biosynthesis protein COQ9, mitochondrial precursor [Homo sapiens]	COQ9	-0.0513992	0.97	0	0	0	NP_064505.1
4507555	thymopoietin isoform alpha [Homo sapiens]	TMPO	-0.0513992	0.97	1	0	0	NP_055448.1
5031699	flotillin-1 [Homo sapiens]	FLOT1	-0.0513992	0.97	1	0	0	NP_001132913.1
5453595	adenylyl cyclase-associated protein 1 [Homo sapiens]	CAP1	-0.0513992	0.97	1	1	0	NP_001153060.1
15150811	28S ribosomal protein S36, mitochondrial [Homo sapiens]	MRPS36	-0.0513992	0.97	0	1	0	NP_002215.2
24111250	guanine nucleotide-binding protein subunit alpha-13 [Homo sapiens]	GNA13	-0.0513992	0.97	0	1	0	NP_001007.2
4826898	profilin-1 [Homo sapiens]	PFN1	-0.0499049	0.97	0	0	0	NP_112552.1
4885375	histone H1.2 [Homo sapiens]	HIST1H1C	-0.0499049	0.97	0	0	0	XP_003118902.1
163660385	ubiquitin-conjugating enzyme E2 K isoform 2 [Homo sapiens]	UBE2K	-0.0499049	0.97	0	0	0	NP_000978.1
304571975	L-xylulose reductase isoform 2 [Homo sapiens]	DCXR	-0.0499049	0.97	0	0	0	NP_003357.2
4506567	mRNA cap guanine-N7 methyltransferase [Homo sapiens]	RNMT	-0.0499049	0.97	1	2	0	NP_110416.1
157739940	nucleoside diphosphate-linked moiety X motif 19, mitochondrial precursor [Homo sapiens]	NUDT19	-0.0499049	0.97	2	1	0	NP_004631.1
31543380	protein DJ-1 [Homo sapiens]	PARK7	-0.0484122	0.97	0	0	0	NP_001124161.1
32454741	serpin H1 precursor [Homo sapiens]	SERPINH1	-0.0484122	0.97	0	0	0	NP_660341.2
238776833	THO complex subunit 4 [Homo sapiens]	THOC4	-0.0484122	0.97	0	1	1	NP_057571.1
11386147	proactivator polypeptide isoform a preproprotein [Homo sapiens]	PSAP	-0.0484122	0.97	0	2	0	NP_055037.1
111494248	rho-related GTP-binding protein RhoC precursor [Homo sapiens]	RHOC	-0.046921	0.97	0	0	0	NP_056139.1
217272894	116 kDa U5 small nuclear ribonucleoprotein component isoform b [Homo sapiens]	EFTUD2	-0.046921	0.97	0	0	0	NP_060579.3
4504901	importin subunit alpha-4 [Homo sapiens]	KPNA4	-0.046921	0.97	2	1	0	NP_003644.2
4505891	procollagen-lysine,2-oxoglutarate 5-dioxygenase 3 precursor [Homo sapiens]	PLOD3	-0.046921	0.97	1	0	0	NP_001191396.1
13491166	pumilio homolog 1 isoform 2 [Homo sapiens]	PUM1	-0.046921	0.97	2	1	0	NP_000109.1
32967264	merlin isoform 7 [Homo sapiens]	NF2	-0.046921	0.97	1	0	0	NP_057575.2
108773789	replication factor C subunit 3 isoform 2 [Homo sapiens]	RFC3	-0.046921	0.97	0	1	0	NP_002302.2
295054220	telomere-associated protein RIF1 isoform 2 [Homo sapiens]	RIF1	-0.046921	0.97	1	1	0	NP_004810.2
34485714	ras-related protein Rab-23 [Homo sapiens]	RAB23	-0.0454314	0.97	0	1	0	NP_003482.1
66346721	phosphoenolpyruvate carboxykinase [GTP], mitochondrial isoform 1 precursor [Homo sapiens]	PCK2	-0.0439433	0.97	2	0	0	NP_060668.2
33469985	peptidyl-prolyl cis-trans isomerase FKBP9 precursor [Homo sapiens]	FKBP9	-0.0424568	0.97	0	0	0	NP_077003.1
193290128	signal peptidase complex subunit 1 [Homo sapiens]	SPCS1	-0.0424568	0.97	0	0	0	NP_001020329.1
221139888	cell cycle control protein 50A isoform 2 [Homo sapiens]	TMEM30A	-0.0424568	0.97	0	0	0	NP_001139662.1
291621647	membrane-associated progesterone receptor component 2 [Homo sapiens]	PGRMC2	-0.0424568	0.97	0	0	0	NP_065998.3
221136993	thioredoxin-related transmembrane protein 2 isoform 2 [Homo sapiens]	TMX2	-0.0424568	0.97	1	1	0	NP_001119.3
4758112	spliceosome RNA helicase BAT1 [Homo sapiens]	DDX39B	-0.0409718	0.97	0	0	0	NP_886552.2
4758950	peptidyl-prolyl cis-trans isomerase B precursor [Homo sapiens]	PPIB	-0.0394883	0.97	0	0	0	NP_060299.4
13128860	histone deacetylase 1 [Homo sapiens]	HDAC1	-0.0394883	0.97	0	0	0	NP_115726.1
4505021	alpha-2-macroglobulin receptor-associated protein precursor [Homo sapiens]	LRPAP1	-0.0394883	0.97	1	0	0	NP_787048.1
4826940	lysosomal Pro-X carboxypeptidase isoform 1 preproprotein [Homo sapiens]	PRCP	-0.0394883	0.97	3	1	0	NP_671692.1
20336302	putative ATP-dependent RNA helicase DHX33 isoform 1 [Homo sapiens]	DHX33	-0.0394883	0.97	1	0	0	NP_001143.2
15487670	nuclear RNA export factor 1 isoform 1 [Homo sapiens]	NXF1	-0.0380063	0.97	0	0	0	NP_001161396.1
21735485	ATP synthase mitochondrial F1 complex assembly factor 2 precursor [Homo sapiens]	ATPAF2	-0.0380063	0.97	0	0	0	NP_004847.2
24233517	inhibitor of nuclear factor kappa-B kinase-interacting protein isoform 1 [Homo sapiens]	IKBIP	-0.0380063	0.97	1	1	0	NP_004528.1
118402590	myosin-XV [Homo sapiens]	MYO15A	-0.0380063	0.97	2	0	0	NP_009201.2
300796323	retinoblastoma-binding protein 5 isoform 2 [Homo sapiens]	RBBP5	-0.0380063	0.97	2	2	0	NP_002255.3
8923421	seryl-tRNA synthetase, mitochondrial isoform b precursor [Homo sapiens]	SARS2	-0.0365259	0.98	0	0	0	NP_006258.3
9945306	microsomal glutathione S-transferase 1 [Homo sapiens]	MGST1	-0.0365259	0.98	0	0	0	NP_057671.2
56550051	U4/U6.U5 tri-snRNP-associated protein 2 [Homo sapiens]	USP39	-0.0365259	0.98	0	0	0	NP_001899.1
6005731	calcium-binding protein p22 [Homo sapiens]	CHP	-0.0365259	0.98	0	2	1	NP_001181.2
21327667	ribosome biogenesis protein BOP1 [Homo sapiens]	BOP1	-0.0365259	0.98	1	0	0	NP_079510.1
218083269	chitinase domain-containing protein 1 isoform c [Homo sapiens]	CHID1	-0.0365259	0.98	1	0	0	NP_644802.1
5174741	ubiquitin carboxyl-terminal hydrolase isozyme L3 [Homo sapiens]	UCHL3	-0.0350469	0.98	0	0	0	NP_056525.2
5803133	ras-related protein Rab-32 [Homo sapiens]	RAB32	-0.0350469	0.98	0	0	0	NP_002790.1
19913369	transducin beta-like protein 3 [Homo sapiens]	TBL3	-0.0350469	0.98	0	0	0	NP_008993.1
20357529	guanine nucleotide-binding protein G(I)/G(S)/G(T) subunit beta-2 [Homo sapiens]	GNB2	-0.0350469	0.98	0	0	0	NP_775083.1
40807504	actin filament-associated protein 1 [Homo sapiens]	AFAP1	-0.0350469	0.98	0	0	0	NP_054757.1
51477708	heterogeneous nuclear ribonucleoprotein D0 isoform d [Homo sapiens]	HNRNPD	-0.0350469	0.98	0	0	0	NP_000934.1
106879206	lysine-specific demethylase NO66 [Homo sapiens]	C14orf169	-0.0350469	0.98	0	0	0	NP_954654.1
4506675	dolichyl-diphosphooligosaccharide--protein glycosyltransferase subunit 1 precursor [Homo sapiens]	RPN1	-0.0350469	0.98	1	0	0	NP_001135938.1
4507801	small ubiquitin-related modifier 1 isoform a precursor [Homo sapiens]	SUMO1	-0.0350469	0.98	0	1	0	NP_073568.2
91208418	transcription elongation regulator 1 isoform 2 [Homo sapiens]	TCERG1	-0.0350469	0.98	1	0	0	XP_001719458.1
50233814	zinc finger CCCH domain-containing protein 14 isoform 3 [Homo sapiens]	ZC3H14	-0.0335695	0.98	0	0	0	NP_055040.2
209571584	farnesyl pyrophosphate synthase isoform b [Homo sapiens]	FDPS	-0.0335695	0.98	0	0	0	NP_055487.2
21361468	nucleolar protein 11 [Homo sapiens]	NOL11	-0.0320936	0.98	1	0	0	NP_056175.3
38045919	huntingtin-interacting protein 1 [Homo sapiens]	HIP1	-0.0320936	0.98	3	0	0	NP_055586.1
38176300	nestin [Homo sapiens]	NES	-0.0320936	0.98	5	0	0	NP_001020278.1
41350201	epsin-1 isoform c [Homo sapiens]	EPN1	-0.0320936	0.98	0	1	0	NP_694590.2
50659059	lysocardiolipin acyltransferase 1 isoform 2 [Homo sapiens]	LCLAT1	-0.0320936	0.98	2	1	0	NP_004956.5
296531339	1-phosphatidylinositol-4,5-bisphosphate phosphodiesterase beta-3 isoform 2 [Homo sapiens]	PLCB3	-0.0320936	0.98	1	0	0	NP_002940.2
4505773	prohibitin [Homo sapiens]	PHB	-0.0306192	0.98	0	0	0	NP_001163.1
310133124	PREDICTED: n-acetylserotonin O-methyltransferase-like protein-like [Homo sapiens]	LOC100133578	-0.0306192	0.98	0	0	0	NP_001168.1
4758648	kinesin-1 heavy chain [Homo sapiens]	KIF5B	-0.0306192	0.98	1	1	0	NP_000007.1
55749531	splicing factor 3B subunit 2 [Homo sapiens]	SF3B2	-0.0306192	0.98	3	0	0	NP_060366.1
98986331	pentatricopeptide repeat-containing protein 2 [Homo sapiens]	PTCD2	-0.0291463	0.98	0	0	0	NP_005137.1
225007652	ribonucleases P/MRP protein subunit POP1 [Homo sapiens]	POP1	-0.0291463	0.98	0	0	0	NP_001177810.1
15431306	60S ribosomal protein L8 [Homo sapiens]	RPL8	-0.0291463	0.98	1	0	0	NP_055847.1
296011001	abl interactor 1 isoform k [Homo sapiens]	ABI1	-0.0291463	0.98	0	1	0	NP_951032.1
4505753	phosphoglycerate mutase 1 [Homo sapiens]	PGAM1	-0.027675	0.98	0	0	0	NP_694858.1
42560244	peptidyl-prolyl cis-trans isomerase G [Homo sapiens]	PPIG	-0.027675	0.98	0	0	0	NP_055975.1
51317370	NADH dehydrogenase [ubiquinone] 1 alpha subcomplex subunit 6 [Homo sapiens]	NDUFA6	-0.027675	0.98	1	0	0	NP_002746.1
55770836	probable saccharopine dehydrogenase [Homo sapiens]	SCCPDH	-0.027675	0.98	0	1	0	NP_001189431.1
66932916	mitogen-activated protein kinase 1 [Homo sapiens]	MAPK1	-0.027675	0.98	0	2	0	NP_079090.2
142976729	estradiol 17-beta-dehydrogenase 11 [Homo sapiens]	HSD17B11	-0.027675	0.98	2	0	0	NP_008878.3
148596949	nucleolar and coiled-body phosphoprotein 1 [Homo sapiens]	NOLC1	-0.027675	0.98	0	1	0	NP_001140171.1
9910244	28S ribosomal protein S22, mitochondrial [Homo sapiens]	MRPS22	-0.0262051	0.98	0	0	0	NP_001739.2
24475816	trans-2,3-enoyl-CoA reductase [Homo sapiens]	TECR	-0.0262051	0.98	0	0	0	NP_005908.1
4826690	ATP-dependent RNA helicase DHX8 [Homo sapiens]	DHX8	-0.0262051	0.98	3	0	0	NP_005054.3
34101288	cleavage and polyadenylation specificity factor subunit 2 [Homo sapiens]	CPSF2	-0.0262051	0.98	1	1	0	NP_079422.1
4507491	thimet oligopeptidase [Homo sapiens]	THOP1	-0.0247367	0.98	0	0	0	NP_001273.1
6912494	microtubule-associated protein RP/EB family member 1 [Homo sapiens]	MAPRE1	-0.0247367	0.98	0	0	0	NP_001128661.1
4503139	cathepsin B preproprotein [Homo sapiens]	CTSB	-0.0247367	0.98	0	1	0	NP_006849.1
7706501	WW domain-binding protein 11 [Homo sapiens]	WBP11	-0.0247367	0.98	0	1	0	NP_003305.1
11559925	probable Xaa-Pro aminopeptidase 3 [Homo sapiens]	XPNPEP3	-0.0247367	0.98	2	1	0	NP_008869.1
91208426	pre-mRNA-processing-splicing factor 8 [Homo sapiens]	PRPF8	-0.0247367	0.98	7	0	0	NP_060703.3
224493972	thioredoxin domain-containing protein 5 isoform 3 [Homo sapiens]	TXNDC5	-0.0247367	0.98	3	0	0	NP_003012.1
256665247	solute carrier family 41 member 3 isoform 5 [Homo sapiens]	SLC41A3	-0.0247367	0.98	1	0	0	NP_705618.1
21359816	ribonuclease H1 [Homo sapiens]	RNASEH1	-0.0232698	0.98	0	0	0	NP_001013865.1
8923040	CDKN2A-interacting protein [Homo sapiens]	CDKN2AIP	-0.0232698	0.98	1	0	0	NP_001001795.1
14141195	stromal cell-derived factor 2 precursor [Homo sapiens]	SDF2	-0.0232698	0.98	3	0	0	NP_543010.3
31880783	protein pelota homolog [Homo sapiens]	PELO	-0.0232698	0.98	1	0	0	NP_789845.1
40217847	U5 small nuclear ribonucleoprotein 200 kDa helicase [Homo sapiens]	SNRNP200	-0.0232698	0.98	2	0	0	NP_055144.3
71361682	nuclear mitotic apparatus protein 1 [Homo sapiens]	NUMA1	-0.0232698	0.98	5	0	0	NP_001244.1
6678271	TAR DNA-binding protein 43 [Homo sapiens]	TARDBP	-0.0218044	0.99	0	0	0	NP_002756.1
14589953	DNA-directed RNA polymerases I, II, and III subunit RPABC3 [Homo sapiens]	POLR2H	-0.0218044	0.99	0	0	0	NP_612355.1
33589854	biliverdin reductase A precursor [Homo sapiens]	BLVRA	-0.0218044	0.99	0	0	0	NP_004453.3
4502015	A-kinase anchor protein 1, mitochondrial precursor [Homo sapiens]	AKAP1	-0.0218044	0.99	0	2	0	NP_006360.3
24432106	p30 DBC protein [Homo sapiens]	KIAA1967	-0.0218044	0.99	1	0	0	XP_947602.1
48717236	olfactory receptor 2A14 [Homo sapiens]	OR2A14	-0.0218044	0.99	1	0	0	NP_114108.1
50962882	G patch domain-containing protein 8 [Homo sapiens]	GPATCH8	-0.0218044	0.99	2	1	0	NP_003756.1
134152721	transmembrane protein 214 isoform 1 [Homo sapiens]	TMEM214	-0.0218044	0.99	2	0	0	NP_001159574.1
166795268	retinol dehydrogenase 11 [Homo sapiens]	RDH11	-0.0218044	0.99	1	1	0	NP_006550.1
254281335	glutaminyl-peptide cyclotransferase-like protein isoform 2 [Homo sapiens]	QPCTL	-0.0218044	0.99	1	0	0	NP_001137484.1
7657134	dihydroxyacetone phosphate acyltransferase [Homo sapiens]	GNPAT	-0.0203404	0.99	0	0	0	NP_065752.1
14251209	chloride intracellular channel protein 1 [Homo sapiens]	CLIC1	-0.0203404	0.99	0	0	0	NP_996671.1
109148508	ubiquitin thioesterase OTUB1 [Homo sapiens]	OTUB1	-0.0203404	0.99	0	0	0	NP_000108.1
6631100	NK-tumor recognition protein [Homo sapiens]	NKTR	-0.018878	0.99	0	0	0	NP_001180499.1
24234690	double-strand break repair protein MRE11A isoform 2 [Homo sapiens]	MRE11A	-0.018878	0.99	0	0	0	NP_064708.1
42794752	long-chain-fatty-acid--CoA ligase 3 [Homo sapiens]	ACSL3	-0.018878	0.99	0	0	0	NP_060404.3
54792071	small ubiquitin-related modifier 2 isoform b precursor [Homo sapiens]	SUMO2	-0.018878	0.99	0	0	0	NP_072045.1
58530845	zyxin [Homo sapiens]	ZYX	-0.018878	0.99	0	0	0	NP_056955.2
7657269	sister chromatid cohesion protein PDS5 homolog B [Homo sapiens]	PDS5B	-0.018878	0.99	1	0	0	NP_003478.1
20070125	protein disulfide-isomerase precursor [Homo sapiens]	P4HB	-0.018878	0.99	0	1	0	NP_003106.3
4502549	calmodulin [Homo sapiens]	CALM2	-0.0174171	0.99	0	0	0	NP_001157718.1
4504981	galectin-1 [Homo sapiens]	LGALS1	-0.0174171	0.99	0	0	0	NP_001129126.1
4502285	sarcoplasmic/endoplasmic reticulum calcium ATPase 2 isoform 2 [Homo sapiens]	ATP2A2	-0.0174171	0.99	3	0	0	NP_008855.1
7661948	malectin precursor [Homo sapiens]	MLEC	-0.0174171	0.99	0	3	0	NP_065147.1
28466983	prolyl 3-hydroxylase 3 precursor [Homo sapiens]	LEPREL2	-0.0174171	0.99	3	0	0	NP_008971.2
256773178	WD repeat-containing protein 46 isoform 2 [Homo sapiens]	WDR46	-0.0174171	0.99	1	0	0	NP_037425.1
6912238	peroxiredoxin-5, mitochondrial isoform a precursor [Homo sapiens]	PRDX5	-0.0159576	0.99	0	0	0	NP_003364.1
18860916	5'-3' exoribonuclease 2 [Homo sapiens]	XRN2	-0.0159576	0.99	0	0	0	NP_003240.1
56682959	ferritin heavy chain [Homo sapiens]	FTH1	-0.0159576	0.99	1	0	0	NP_005710.1
116063536	ubiquinone biosynthesis methyltransferase COQ5, mitochondrial precursor [Homo sapiens]	COQ5	-0.0159576	0.99	1	0	0	NP_005955.1
149193321	G-rich sequence factor 1 isoform 1 [Homo sapiens]	GRSF1	-0.0159576	0.99	1	0	0	NP_001406.1
5174449	histone H1x [Homo sapiens]	H1FX	-0.0144996	0.99	0	0	0	NP_001139139.1
21687129	nudC domain-containing protein 2 [Homo sapiens]	NUDCD2	-0.0144996	0.99	0	0	0	NP_149124.3
215490089	histone deacetylase complex subunit SAP18 [Homo sapiens]	SAP18	-0.0144996	0.99	0	2	0	NP_808227.1
4759158	small nuclear ribonucleoprotein Sm D2 isoform 1 [Homo sapiens]	SNRPD2	-0.013043	0.99	0	0	0	NP_004118.3
13236495	quinone oxidoreductase isoform a [Homo sapiens]	CRYZ	-0.013043	0.99	0	0	0	NP_006824.2
66348045	nuclear-interacting partner of ALK [Homo sapiens]	ZC3HC1	-0.013043	0.99	0	0	0	NP_000972.1
296080714	GPI transamidase component PIG-T isoform 4 precursor [Homo sapiens]	PIGT	-0.013043	0.99	0	0	0	NP_055568.3
197927454	protein DEK isoform 2 [Homo sapiens]	DEK	-0.013043	0.99	0	1	0	NP_057136.2
266453748	6-phosphofructokinase, muscle type isoform 2 [Homo sapiens]	PFKM	-0.013043	0.99	1	0	0	NP_056991.2
4506127	ribose-phosphate pyrophosphokinase 1 isoform 1 [Homo sapiens]	PRPS1	-0.011588	0.99	0	0	0	NP_055423.1
12056473	sialic acid synthase [Homo sapiens]	NANS	-0.011588	0.99	0	0	0	NP_055045.2
4885413	histidine triad nucleotide-binding protein 1 [Homo sapiens]	HINT1	-0.0101344	0.99	0	0	0	NP_006658.1
8923557	protein C20orf11 [Homo sapiens]	C20orf11	-0.0101344	0.99	0	0	0	NP_055987.2
9558733	transformer-2 protein homolog alpha [Homo sapiens]	TRA2A	-0.0101344	0.99	0	0	0	NP_001272.2
21914862	cat eye syndrome chromosome region, candidate 5 isoform 1 [Homo sapiens]	CECR5	-0.0101344	0.99	0	0	0	NP_004844.1
50659095	nucleolar RNA helicase 2 [Homo sapiens]	DDX21	-0.0101344	0.99	2	2	1	NP_001139021.1
5803167	splicing factor 3A subunit 3 [Homo sapiens]	SF3A3	-0.0101344	0.99	1	0	0	NP_660088.1
24430149	nuclear pore complex protein Nup155 isoform 1 [Homo sapiens]	NUP155	-0.0101344	0.99	2	0	0	NP_114401.2
56243583	WD repeat-containing protein 18 [Homo sapiens]	WDR18	-0.0101344	0.99	1	0	0	NP_060460.4
4505185	macrophage migration inhibitory factor [Homo sapiens]	MIF	-0.00868224	0.99	0	0	0	NP_001389.2
29568103	U1 small nuclear ribonucleoprotein 70 kDa [Homo sapiens]	SNRNP70	-0.00868224	0.99	0	0	0	NP_004348.2
46852388	cell division cycle and apoptosis regulator protein 1 [Homo sapiens]	CCAR1	-0.00868224	0.99	0	0	0	NP_001138830.1
310129373	PREDICTED: syntaxin-5-like [Homo sapiens]	LOC100510546	-0.00868224	0.99	0	0	0	NP_004438.3
313747584	Golgi-specific brefeldin A-resistance guanine nucleotide exchange factor 1 isoform 3 [Homo sapiens]	GBF1	-0.00868224	0.99	0	0	0	NP_001068566.1
4504957	lysosome-associated membrane glycoprotein 2 isoform A precursor [Homo sapiens]	LAMP2	-0.00868224	0.99	0	6	2	NP_078930.3
54633315	deoxynucleotidyltransferase terminal-interacting protein 2 [Homo sapiens]	DNTTIP2	-0.00868224	0.99	1	0	0	NP_973727.1
111118981	NADPH:adrenodoxin oxidoreductase, mitochondrial isoform 1 precursor [Homo sapiens]	FDXR	-0.00868224	0.99	1	0	0	NP_002296.1
148746216	protein LMBR1L [Homo sapiens]	LMBR1L	-0.00868224	0.99	0	1	0	NP_003095.2
12667788	myosin-9 [Homo sapiens]	MYH9	-0.00723157	1	0	0	0	NP_113608.1
167614485	3-ketoacyl-CoA thiolase, mitochondrial [Homo sapiens]	ACAA2	-0.00723157	1	0	0	0	NP_005361.2
209915573	amyloid beta A4 protein isoform f precursor [Homo sapiens]	APP	-0.00723157	1	0	0	0	NP_001135937.1
323714253	lysosome membrane protein 2 [Homo sapiens]	SCARB2	-0.00723157	1	0	0	0	NP_001165882.1
4557493	cleavage stimulation factor subunit 2 [Homo sapiens]	CSTF2	-0.00723157	1	2	0	0	NP_076977.3
23308607	minor histocompatibility antigen H13 isoform 1 [Homo sapiens]	HM13	-0.00723157	1	1	0	0	NP_001159400.2
55741677	histone-lysine N-methyltransferase SETD1A [Homo sapiens]	SETD1A	-0.00723157	1	1	0	0	NP_005709.1
21070997	stromal interaction molecule 1 precursor [Homo sapiens]	STIM1	-0.00578235	1	0	0	0	NP_005648.1
14861836	alpha-1,3-mannosyltransferase ALG2 [Homo sapiens]	ALG2	-0.00578235	1	2	1	1	NP_003084.1
4502011	adenylate kinase isoenzyme 1 [Homo sapiens]	AK1	-0.00578235	1	1	0	0	NP_001675.3
4506455	reticulocalbin-1 precursor [Homo sapiens]	RCN1	-0.00578235	1	2	1	0	NP_663612.1
5031973	protein disulfide-isomerase A6 precursor [Homo sapiens]	PDIA6	-0.00578235	1	1	0	0	NP_055898.1
29725609	epidermal growth factor receptor isoform a precursor [Homo sapiens]	EGFR	-0.00578235	1	2	0	0	NP_003325.2
83921614	cytochrome b5 type B precursor [Homo sapiens]	CYB5B	-0.00433459	1	0	0	0	NP_001127807.1
5454154	peptidyl-prolyl cis-trans isomerase H [Homo sapiens]	PPIH	-0.00433459	1	1	0	0	NP_065075.1
8923444	H/ACA ribonucleoprotein complex subunit 2 isoform a [Homo sapiens]	NHP2	-0.00288828	1	0	0	0	NP_055642.3
4507835	uridine 5'-monophosphate synthase [Homo sapiens]	UMPS	-0.00288828	1	0	2	0	NP_057106.2
10190714	ras-related protein Rab-22A [Homo sapiens]	RAB22A	-0.00144342	1	0	0	0	NP_002800.2
23397570	PI-PLC X domain-containing protein 2 isoform b [Homo sapiens]	PLCXD2	-0.00144342	1	0	0	0	NP_001419.1
217330598	glyoxalase domain-containing protein 4 [Homo sapiens]	GLOD4	-0.00144342	1	0	0	0	NP_005780.2
45643127	guanine nucleotide-binding protein-like 3 isoform 2 [Homo sapiens]	GNL3	-0.00144342	1	1	0	0	NP_001348.2
50593002	U2 small nuclear ribonucleoprotein A' [Homo sapiens]	SNRPA1	-0.00144342	1	2	0	0	NP_060555.2
111955139	GTP-binding protein 10 isoform 2 [Homo sapiens]	GTPBP10	-0.00144342	1	2	1	0	NP_001184162.1
21265070	39S ribosomal protein L2, mitochondrial precursor [Homo sapiens]	MRPL2	0	1	0	0	0	NP_006591.1
24308007	ADP-ribosylation factor-like protein 6-interacting protein 1 [Homo sapiens]	ARL6IP1	0	1	0	0	0	NP_004148.1
27597059	dnaJ homolog subfamily C member 9 [Homo sapiens]	DNAJC9	0	1	0	0	0	NP_004227.1
57013276	tubulin alpha-1B chain [Homo sapiens]	TUBA1B	0	1	0	0	0	NP_001002909.1
87159816	V-type proton ATPase subunit E 1 isoform b [Homo sapiens]	ATP6V1E1	0	1	0	0	0	NP_060762.3
253970456	HIV Tat-specific factor 1 [Homo sapiens]	HTATSF1	0	1	1	1	0	NP_054760.3
258645172	2-oxoisovalerate dehydrogenase subunit alpha, mitochondrial isoform 2 precursor [Homo sapiens]	BCKDHA	0	1	1	0	0	NP_001316.1
4503183	cytochrome b5 isoform 2 [Homo sapiens]	CYB5A	0.00144197	1	0	0	0	NP_001252.1
22907025	probable DNA dC-_dU-editing enzyme APOBEC-3B [Homo sapiens]	APOBEC3B	0.00144197	1	0	0	0	NP_055100.2
4506113	major prion protein preproprotein [Homo sapiens]	PRNP	0.00144197	1	0	1	0	NP_036526.2
4757834	BAG family molecular chaperone regulator 2 [Homo sapiens]	BAG2	0.00288251	1	0	0	0	NP_775899.3
4757952	cell division control protein 42 homolog isoform 1 [Homo sapiens]	CDC42	0.00288251	1	0	0	0	NP_663780.2
122114651	ubiquitin carboxyl-terminal hydrolase 36 [Homo sapiens]	USP36	0.00288251	1	0	0	0	NP_055288.1
5032189	tumor suppressor p53-binding protein 1 isoform 3 [Homo sapiens]	TP53BP1	0.00288251	1	2	1	0	NP_006175.2
5032219	uronyl 2-sulfotransferase [Homo sapiens]	UST	0.00288251	1	3	0	0	NP_620162.1
13376331	L-2-hydroxyglutarate dehydrogenase, mitochondrial precursor [Homo sapiens]	L2HGDH	0.00288251	1	1	1	0	NP_689926.1
15553127	hexokinase-2 [Homo sapiens]	HK2	0.00288251	1	0	2	0	NP_001073922.2
32967307	ubiquinone biosynthesis monooxygenase COQ6 isoform b [Homo sapiens]	COQ6	0.00288251	1	1	0	0	NP_057604.1
106049292	pyruvate carboxylase, mitochondrial precursor [Homo sapiens]	PC	0.00288251	1	2	1	0	NP_056937.2
314122231	large proline-rich protein BAT3 isoform c [Homo sapiens]	BAG6	0.00432161	1	0	0	0	NP_078804.2
4506357	myelin protein zero-like protein 1 isoform a [Homo sapiens]	MPZL1	0.00432161	1	0	1	0	NP_006451.1
47174864	exosome complex exonuclease RRP46 [Homo sapiens]	EXOSC5	0.00575927	1	0	0	0	NP_005331.1
56676330	heterochromatin protein 1-binding protein 3 [Homo sapiens]	HP1BP3	0.00575927	1	0	0	0	NP_000992.1
6912246	DNA-directed RNA polymerase I subunit RPA34 [Homo sapiens]	CD3EAP	0.00575927	1	2	0	0	NP_037423.2
15626999	inosine triphosphate pyrophosphatase isoform a [Homo sapiens]	ITPA	0.00575927	1	0	0	0	NP_056422.2
62243696	cohesin subunit SA-1 [Homo sapiens]	STAG1	0.00575927	1	4	1	0	NP_006570.1
4503117	cystatin-B [Homo sapiens]	CSTB	0.0071955	1.01	0	0	0	NP_004981.2
16554609	28S ribosomal protein S11, mitochondrial isoform a [Homo sapiens]	MRPS11	0.0071955	1.01	0	0	0	NP_055704.2
4507123	U2 small nuclear ribonucleoprotein B'' [Homo sapiens]	SNRPB2	0.0086303	1.01	0	0	0	NP_001121698.1
6005842	proline synthase co-transcribed bacterial homolog protein [Homo sapiens]	PROSC	0.0086303	1.01	0	0	0	NP_005581.2
210032390	protein SEC13 homolog isoform 2 [Homo sapiens]	SEC13	0.0086303	1.01	0	0	0	NP_005712.1
21040257	probable tRNA pseudouridine synthase 1 [Homo sapiens]	TRUB1	0.0086303	1.01	1	0	0	NP_006251.1
110227598	putative phospholipase B-like 1 precursor [Homo sapiens]	PLBD1	0.0086303	1.01	2	0	0	NP_644815.1
208022658	beta-galactosidase isoform c preproprotein [Homo sapiens]	GLB1	0.0086303	1.01	4	0	0	NP_938148.1
15029520	probable histidyl-tRNA synthetase, mitochondrial precursor [Homo sapiens]	HARS2	0.0100637	1.01	0	0	0	NP_001154485.1
21264578	tetraspanin-1 [Homo sapiens]	TSPAN1	0.0100637	1.01	0	0	0	NP_005608.1
158937236	puromycin-sensitive aminopeptidase [Homo sapiens]	NPEPPS	0.0100637	1.01	0	0	0	NP_001094096.1
190014588	PC4 and SFRS1-interacting protein isoform 2 [Homo sapiens]	PSIP1	0.0100637	1.01	0	0	0	NP_060739.2
5031873	protein ERGIC-53 precursor [Homo sapiens]	LMAN1	0.0100637	1.01	3	1	0	NP_001014837.1
115387104	4-trimethylaminobutyraldehyde dehydrogenase [Homo sapiens]	ALDH9A1	0.0100637	1.01	1	0	0	NP_004208.2
166795297	cytoplasmic dynein 1 light intermediate chain 1 [Homo sapiens]	DYNC1LI1	0.0100637	1.01	1	0	0	NP_001138899.1
11527390	DNA-directed RNA polymerases I, II, and III subunit RPABC2 [Homo sapiens]	POLR2F	0.0114956	1.01	0	0	0	NP_006421.2
19913432	V-type proton ATPase subunit d 1 [Homo sapiens]	ATP6V0D1	0.0114956	1.01	0	0	0	NP_002264.1
61966781	hypothetical protein LOC391356 [Homo sapiens]	PTRHD1	0.0114956	1.01	0	0	0	NP_115691.1
312836806	adenylate kinase 2, mitochondrial isoform c [Homo sapiens]	AK2	0.0114956	1.01	0	0	0	NP_006624.2
284795266	signal recognition particle receptor subunit beta [Homo sapiens]	SRPRB	0.0114956	1.01	1	1	1	NP_001075019.1
4557541	torsin-1A precursor [Homo sapiens]	TOR1A	0.0114956	1.01	0	1	0	NP_003398.1
22027538	programmed cell death 6-interacting protein isoform 1 [Homo sapiens]	PDCD6IP	0.0114956	1.01	0	1	0	NP_001091.1
34101286	zinc finger RNA-binding protein [Homo sapiens]	ZFR	0.0114956	1.01	1	0	0	NP_004146.1
156627575	UDP-N-acetylhexosamine pyrophosphorylase [Homo sapiens]	UAP1	0.0129262	1.01	0	0	0	NP_003312.3
5803040	transmembrane emp24 domain-containing protein 1 precursor [Homo sapiens]	TMED1	0.0129262	1.01	1	0	0	NP_061119.1
39753957	torsin-1A-interacting protein 1 [Homo sapiens]	TOR1AIP1	0.0129262	1.01	1	0	0	NP_061854.1
94721261	2',3'-cyclic-nucleotide 3'-phosphodiesterase [Homo sapiens]	CNP	0.0129262	1.01	0	2	0	NP_001180201.1
5453678	epididymal secretory protein E1 precursor [Homo sapiens]	NPC2	0.0143553	1.01	0	0	0	NP_003733.2
55770906	pre-mRNA-splicing factor SYF1 [Homo sapiens]	XAB2	0.0143553	1.01	0	0	0	NP_001649.1
251831117	NADH dehydrogenase subunit 5 [Homo sapiens]	ND5	0.0143553	1.01	0	0	0	NP_004554.2
11345462	signal peptidase complex subunit 3 [Homo sapiens]	SPCS3	0.0143553	1.01	1	1	0	NP_001070151.1
192455698	probable glutathione peroxidase 8 [Homo sapiens]	GPX8	0.0143553	1.01	0	1	0	NP_055521.1
14165466	polypyrimidine tract-binding protein 1 isoform c [Homo sapiens]	PTBP1	0.015783	1.01	0	0	0	NP_000683.3
20149619	dehydrogenase/reductase SDR family member 7B [Homo sapiens]	DHRS7B	0.015783	1.01	0	0	0	NP_775738.3
112380628	lysosome-associated membrane glycoprotein 1 precursor [Homo sapiens]	LAMP1	0.015783	1.01	0	0	0	NP_006319.1
10047140	RNA-binding protein PNO1 [Homo sapiens]	PNO1	0.015783	1.01	1	0	0	NP_002809.2
223941785	paired amphipathic helix protein Sin3a [Homo sapiens]	SIN3A	0.015783	1.01	1	4	0	NP_000980.1
5729850	guanine nucleotide-binding protein G(k) subunit alpha [Homo sapiens]	GNAI3	0.0172093	1.01	0	0	0	NP_056284.1
50592994	thioredoxin [Homo sapiens]	TXN	0.0172093	1.01	0	0	0	XP_001713927.1
21361181	sodium/potassium-transporting ATPase subunit alpha-1 isoform a [Homo sapiens]	ATP1A1	0.0172093	1.01	2	0	0	NP_071736.1
4507869	vasodilator-stimulated phosphoprotein [Homo sapiens]	VASP	0.0186342	1.01	0	0	0	NP_115898.2
62955803	nucleoporin NUP188 homolog [Homo sapiens]	NUP188	0.0186342	1.01	0	0	0	NP_112182.1
157694520	enoyl-CoA hydratase domain-containing protein 1 isoform 3 [Homo sapiens]	ECHDC1	0.0186342	1.01	1	0	0	NP_005585.1
4504771	eukaryotic translation initiation factor 6 isoform a [Homo sapiens]	EIF6	0.0200577	1.01	0	0	0	NP_085153.1
7661920	eukaryotic initiation factor 4A-III [Homo sapiens]	EIF4A3	0.0200577	1.01	0	0	0	NP_937838.1
325120984	RNA-binding protein 10 isoform 4 [Homo sapiens]	RBM10	0.0200577	1.01	0	0	0	NP_787103.1
24762236	pre-mRNA-splicing factor 38A [Homo sapiens]	PRPF38A	0.0200577	1.01	2	1	1	NP_001854.1
117938251	bcl-2-associated transcription factor 1 isoform 2 [Homo sapiens]	BCLAF1	0.0200577	1.01	1	2	1	NP_064547.2
5729810	3-beta-hydroxysteroid-Delta(8),Delta(7)-isomerase [Homo sapiens]	EBP	0.0200577	1.01	1	0	0	NP_002803.2
8923771	ELG protein isoform b [Homo sapiens]	C17orf85	0.0200577	1.01	0	0	0	NP_071334.1
100816392	far upstream element-binding protein 3 [Homo sapiens]	FUBP3	0.0200577	1.01	2	0	0	NP_060937.1
112421122	dnaJ homolog subfamily C member 13 [Homo sapiens]	DNAJC13	0.0200577	1.01	6	0	0	NP_001656.2
171460918	dynamin-1-like protein isoform 3 [Homo sapiens]	DNM1L	0.0200577	1.01	2	1	0	NP_056169.1
4507751	thymidylate synthase [Homo sapiens]	TYMS	0.0214797	1.02	0	0	0	NP_116126.2
4759160	small nuclear ribonucleoprotein Sm D3 [Homo sapiens]	SNRPD3	0.0214797	1.02	0	0	0	NP_001120686.1
4506467	radixin [Homo sapiens]	RDX	0.0214797	1.02	1	0	0	NP_963906.1
4557565	DNA excision repair protein ERCC-6 [Homo sapiens]	ERCC6	0.0214797	1.02	3	0	0	NP_066406.1
116805327	methylcrotonoyl-CoA carboxylase subunit alpha, mitochondrial precursor [Homo sapiens]	MCCC1	0.0214797	1.02	2	0	0	NP_054783.2
215272341	THO complex subunit 6 homolog isoform 2 [Homo sapiens]	THOC6	0.0214797	1.02	1	0	0	NP_078974.1
4504041	guanine nucleotide-binding protein G(i) subunit alpha-2 isoform 1 [Homo sapiens]	GNAI2	0.0229004	1.02	0	0	0	NP_006362.1
5453629	dynactin subunit 2 [Homo sapiens]	DCTN2	0.0229004	1.02	0	0	0	NP_065796.1
16753215	profilin-2 isoform a [Homo sapiens]	PFN2	0.0229004	1.02	0	0	0	NP_002464.1
19743823	integrin beta-1 isoform 1A precursor [Homo sapiens]	ITGB1	0.0229004	1.02	0	0	0	NP_006586.1
21264341	spermine synthase [Homo sapiens]	SMS	0.0229004	1.02	0	0	0	NP_110393.1
27777661	keratinocyte-associated protein 2 [Homo sapiens]	KRTCAP2	0.0229004	1.02	0	0	0	NP_055318.2
38372925	basigin isoform 2 precursor [Homo sapiens]	BSG	0.0229004	1.02	0	0	0	NP_612429.2
4758138	probable ATP-dependent RNA helicase DDX5 [Homo sapiens]	DDX5	0.0229004	1.02	1	0	0	NP_001171968.1
5902016	reticulon-4 isoform C [Homo sapiens]	RTN4	0.0229004	1.02	2	0	0	NP_073567.1
7661922	ras-related protein Rab-21 [Homo sapiens]	RAB21	0.0229004	1.02	0	1	0	NP_001447.2
18379366	CAAX prenyl protease 1 homolog [Homo sapiens]	ZMPSTE24	0.0229004	1.02	2	0	0	NP_001129487.1
22538442	cathepsin Z preproprotein [Homo sapiens]	CTSZ	0.0229004	1.02	1	0	0	NP_055227.1
29540564	armadillo repeat-containing X-linked protein 3 [Homo sapiens]	ARMCX3	0.0229004	1.02	0	1	0	NP_000997.1
143770802	39S ribosomal protein L1, mitochondrial precursor [Homo sapiens]	MRPL1	0.0229004	1.02	1	0	0	NP_002067.1
194328699	probable ribosome biogenesis protein NEP1 [Homo sapiens]	EMG1	0.0243197	1.02	0	0	0	NP_056073.1
24308271	oligosaccharyltransferase complex subunit OSTC [Homo sapiens]	OSTC	0.0243197	1.02	0	1	0	NP_004166.1
31317305	U3 small nucleolar ribonucleoprotein protein MPP10 [Homo sapiens]	MPHOSPH10	0.0243197	1.02	2	0	0	NP_001170904.1
6005872	translocation protein SEC63 homolog [Homo sapiens]	SEC63	0.0257376	1.02	0	3	1	NP_003944.1
7657069	ERO1-like protein alpha precursor [Homo sapiens]	ERO1L	0.0257376	1.02	1	0	0	NP_037380.1
21265040	39S ribosomal protein L22, mitochondrial isoform a [Homo sapiens]	MRPL22	0.0257376	1.02	0	3	0	NP_002853.2
38679884	sorcin isoform b [Homo sapiens]	SRI	0.0257376	1.02	0	1	0	NP_055577.1
51477714	alpha-mannosidase 2 [Homo sapiens]	MAN2A1	0.0257376	1.02	2	0	0	NP_001157565.1
190194412	thyroid receptor-interacting protein 11 [Homo sapiens]	TRIP11	0.0257376	1.02	2	1	0	NP_848699.1
229892270	DDB1- and CUL4-associated factor 13 [Homo sapiens]	DCAF13	0.0257376	1.02	4	0	0	NP_079508.2
4507133	small nuclear ribonucleoprotein G [Homo sapiens]	SNRPG	0.0271541	1.02	0	0	0	NP_149100.2
24308201	adipocyte plasma membrane-associated protein [Homo sapiens]	C20orf3	0.0271541	1.02	0	0	0	NP_112740.1
29788785	tubulin beta chain [Homo sapiens]	TUBB	0.0271541	1.02	0	0	0	NP_665739.3
78000158	translation initiation factor eIF-2B subunit delta isoform 2 [Homo sapiens]	EIF2B4	0.0271541	1.02	0	0	0	NP_006861.1
312596944	cyclin-H isoform 2 [Homo sapiens]	CCNH	0.0271541	1.02	0	0	0	NP_001010867.1
122891870	melanoma inhibitory activity protein 3 precursor [Homo sapiens]	MIA3	0.0271541	1.02	4	0	0	NP_003861.1
171906593	[3-methyl-2-oxobutanoate dehydrogenase [lipoamide]] kinase, mitochondrial isoform b [Homo sapiens]	BCKDK	0.0271541	1.02	1	0	0	NP_055828.2
118601081	heterogeneous nuclear ribonucleoprotein U-like protein 2 [Homo sapiens]	HNRNPUL2	0.0285692	1.02	0	0	0	NP_061185.1
4826998	splicing factor, proline- and glutamine-rich [Homo sapiens]	SFPQ	0.0285692	1.02	1	0	0	NP_000088.3
10863889	U4/U6.U5 tri-snRNP-associated protein 1 [Homo sapiens]	SART1	0.0285692	1.02	1	0	0	NP_001135921.1
4507131	small nuclear ribonucleoprotein F [Homo sapiens]	SNRPF	0.0299829	1.02	0	0	0	NP_821133.1
4504151	granulins precursor [Homo sapiens]	GRN	0.0299829	1.02	1	0	0	NP_073591.2
24308211	integrator complex subunit 2 [Homo sapiens]	INTS2	0.0299829	1.02	3	1	0	NP_001613.2
24797106	FAS-associated factor 2 [Homo sapiens]	FAF2	0.0299829	1.02	1	0	0	NP_005096.1
228008295	heterogeneous nuclear ribonucleoprotein Q isoform 4 [Homo sapiens]	SYNCRIP	0.0299829	1.02	2	0	0	NP_002058.2
8922328	pre-mRNA-splicing factor RBM22 [Homo sapiens]	RBM22	0.0313952	1.02	0	1	0	NP_001091678.1
48762926	periodic tryptophan protein 2 homolog [Homo sapiens]	PWP2	0.0313952	1.02	2	0	0	NP_892021.1
115527080	metastasis-associated protein MTA1 MTA1 [Homo sapiens]	MTA1	0.0313952	1.02	1	0	0	NP_006702.1
256000760	protein odr-4 homolog isoform 3 [Homo sapiens]	C1orf27	0.0313952	1.02	0	2	0	NP_000909.2
4507127	U1 small nuclear ribonucleoprotein C [Homo sapiens]	SNRPC	0.0328061	1.02	0	0	0	NP_001099014.1
4507509	metalloproteinase inhibitor 1 precursor [Homo sapiens]	TIMP1	0.0328061	1.02	0	0	0	NP_005333.2
48255924	NADH dehydrogenase [ubiquinone] flavoprotein 3, mitochondrial isoform a precursor [Homo sapiens]	NDUFV3	0.0328061	1.02	0	0	0	NP_076998.1
49574529	U3 small nucleolar RNA-associated protein 6 homolog [Homo sapiens]	UTP6	0.0328061	1.02	0	0	0	NP_004783.2
109689718	monoacylglycerol lipase ABHD12 isoform a [Homo sapiens]	ABHD12	0.0328061	1.02	0	0	0	NP_060941.2
4502743	cyclin-dependent kinase 7 [Homo sapiens]	CDK7	0.0328061	1.02	0	1	0	NP_031401.1
5729997	ras-related protein Rab-27B [Homo sapiens]	RAB27B	0.0328061	1.02	2	0	0	NP_079426.2
14589951	DNA-directed RNA polymerases I, II, and III subunit RPABC1 [Homo sapiens]	POLR2E	0.0342157	1.02	0	1	0	NP_060598.3
21956645	myotrophin [Homo sapiens]	MTPN	0.0342157	1.02	0	1	0	NP_002795.2
148491070	CTP synthase 1 [Homo sapiens]	CTPS	0.0342157	1.02	1	1	0	NP_006102.2
162417971	signal peptidase complex subunit 2 [Homo sapiens]	SPCS2	0.0342157	1.02	0	1	0	NP_004996.1
4502901	clathrin light chain B isoform a [Homo sapiens]	CLTB	0.0356239	1.03	0	0	0	NP_009191.1
7705636	vesicle transport protein GOT1B [Homo sapiens]	GOLT1B	0.0356239	1.03	0	0	0	NP_001852.1
20070197	dolichyl-diphosphooligosaccharide--protein glycosyltransferase 48 kDa subunit precursor [Homo sapiens]	DDOST	0.0356239	1.03	0	0	0	NP_057359.2
94721252	vesicle-associated membrane protein-associated protein A isoform 2 [Homo sapiens]	VAPA	0.0356239	1.03	0	4	1	NP_054829.2
24234747	interleukin enhancer-binding factor 2 [Homo sapiens]	ILF2	0.0356239	1.03	1	1	0	NP_067676.2
52630440	peptidyl-prolyl cis-trans isomerase FKBP8 [Homo sapiens]	FKBP8	0.0356239	1.03	1	0	0	NP_002625.1
226371643	prolyl 3-hydroxylase 1 isoform 2 [Homo sapiens]	LEPRE1	0.0356239	1.03	3	0	0	NP_054861.2
226530908	protein-L-isoaspartate(D-aspartate) O-methyltransferase [Homo sapiens]	PCMT1	0.0356239	1.03	1	0	0	NP_002547.1
45439339	[Pyruvate dehydrogenase [acetyl-transferring]]-phosphatase 1, mitochondrial isoform 3 precursor [Homo sapiens]	PDP1	0.0370307	1.03	0	1	0	NP_009107.1
55956921	heterogeneous nuclear ribonucleoprotein A/B isoform b [Homo sapiens]	HNRNPAB	0.0370307	1.03	1	0	0	NP_006487.1
254939537	myosin-XIX isoform 2 [Homo sapiens]	MYO19	0.0370307	1.03	3	0	0	NP_057323.3
5031645	cytochrome c oxidase copper chaperone [Homo sapiens]	COX17	0.0384362	1.03	0	0	0	NP_077310.1
9966799	something about silencing protein 10 [Homo sapiens]	UTP3	0.0384362	1.03	0	0	0	NP_000180.2
19913428	V-type proton ATPase subunit B, brain isoform [Homo sapiens]	ATP6V1B2	0.0384362	1.03	0	0	0	NP_003839.2
24797086	importin-5 [Homo sapiens]	IPO5	0.0384362	1.03	0	0	0	NP_003557.2
157412270	heterogeneous nuclear ribonucleoprotein M isoform b [Homo sapiens]	HNRNPM	0.0384362	1.03	0	0	0	NP_061943.2
208022661	nck-associated protein 5-like [Homo sapiens]	NCKAP5L	0.0384362	1.03	0	0	0	NP_055641.3
4557231	medium-chain specific acyl-CoA dehydrogenase, mitochondrial isoform a precursor [Homo sapiens]	ACADM	0.0384362	1.03	1	0	0	NP_003742.2
4505893	proteolipid protein 2 [Homo sapiens]	PLP2	0.0398403	1.03	0	0	0	NP_036442.3
4506901	serine/arginine-rich splicing factor 3 [Homo sapiens]	SRSF3	0.0398403	1.03	0	0	0	NP_003754.2
5174419	putative ATP-dependent Clp protease proteolytic subunit, mitochondrial precursor [Homo sapiens]	CLPP	0.0398403	1.03	0	0	0	NP_005697.2
7705740	DNA-directed RNA polymerases I and III subunit RPAC2 isoform 1 [Homo sapiens]	POLR1D	0.0398403	1.03	0	0	0	NP_001186078.1
4505917	exosome component 10 isoform 2 [Homo sapiens]	EXOSC10	0.0398403	1.03	2	0	0	NP_004386.2
8923930	CDGSH iron-sulfur domain-containing protein 1 [Homo sapiens]	CISD1	0.0398403	1.03	1	0	0	NP_000511.2
18087855	dynein light chain 2, cytoplasmic [Homo sapiens]	DYNLL2	0.0398403	1.03	0	1	0	NP_006806.1
119964726	cation-independent mannose-6-phosphate receptor precursor [Homo sapiens]	IGF2R	0.0398403	1.03	1	0	0	NP_066553.3
186928850	28S ribosomal protein S27, mitochondrial [Homo sapiens]	MRPS27	0.0398403	1.03	1	1	0	NP_057284.1
221316588	valacyclovir hydrolase precursor [Homo sapiens]	BPHL	0.0398403	1.03	1	0	0	NP_000977.1
116812591	protein RER1 [Homo sapiens]	RER1	0.041243	1.03	0	2	1	NP_001162023.1
4759344	centromere/kinetochore protein zw10 homolog [Homo sapiens]	ZW10	0.041243	1.03	1	0	0	NP_002708.1
7661672	polymerase delta-interacting protein 2 [Homo sapiens]	POLDIP2	0.041243	1.03	1	1	0	NP_114124.1
7705855	estradiol 17-beta-dehydrogenase 12 [Homo sapiens]	HSD17B12	0.041243	1.03	0	0	0	NP_001161354.1
14149680	extended synaptotagmin-1 isoform 2 [Homo sapiens]	ESYT1	0.041243	1.03	4	1	0	NP_076997.1
50959102	THO complex subunit 5 homolog [Homo sapiens]	THOC5	0.041243	1.03	1	0	0	NP_001949.1
4503609	electron transfer flavoprotein subunit beta isoform 1 [Homo sapiens]	ETFB	0.0426443	1.03	0	0	0	NP_001101.1
13376617	prostaglandin E synthase 2 [Homo sapiens]	PTGES2	0.0426443	1.03	0	0	0	NP_057731.1
321400140	CD44 antigen isoform 7 precursor [Homo sapiens]	CD44	0.0426443	1.03	0	0	0	NP_003313.3
14141159	heterogeneous nuclear ribonucleoprotein H3 isoform b [Homo sapiens]	HNRNPH3	0.0426443	1.03	0	0	0	NP_077718.3
49533617	sterol O-acyltransferase 1 [Homo sapiens]	SOAT1	0.0426443	1.03	0	1	0	NP_036558.3
4502693	CD9 antigen [Homo sapiens]	CD9	0.0440443	1.03	0	0	0	NP_001367.2
4758774	NADH dehydrogenase [ubiquinone] 1 beta subcomplex subunit 10 [Homo sapiens]	NDUFB10	0.0440443	1.03	0	0	0	NP_001171812.1
8922331	protein mago nashi homolog 2 [Homo sapiens]	MAGOHB	0.0440443	1.03	0	0	0	NP_005338.1
9506689	exosome complex exonuclease RRP41 [Homo sapiens]	EXOSC4	0.0440443	1.03	0	0	0	NP_001139186.1
57164975	treacle protein isoform b [Homo sapiens]	TCOF1	0.0440443	1.03	0	0	0	NP_004044.3
118402596	cell division cycle protein 23 homolog [Homo sapiens]	CDC23	0.0440443	1.03	0	0	0	NP_006338.1
5902034	periodic tryptophan protein 1 homolog [Homo sapiens]	PWP1	0.0440443	1.03	1	0	0	NP_066997.3
18644728	nucleolar protein 6 alpha isoform [Homo sapiens]	NOL6	0.0440443	1.03	1	0	0	NP_001120920.1
75677335	digestive organ expansion factor homolog [Homo sapiens]	DIEXF	0.0440443	1.03	1	1	0	NP_004550.2
109948304	WD40 repeat-containing protein SMU1 [Homo sapiens]	SMU1	0.0440443	1.03	2	1	0	NP_004747.1
5454028	ras-related protein R-Ras precursor [Homo sapiens]	RRAS	0.045443	1.03	0	0	0	NP_008839.2
154736713	ER lumen protein retaining receptor 2 isoform 2 [Homo sapiens]	KDELR2	0.045443	1.03	0	0	0	NP_004861.2
22267436	protein NipSnap homolog 3A [Homo sapiens]	NIPSNAP3A	0.045443	1.03	1	0	0	NP_001174.2
22749415	dolichyl-diphosphooligosaccharide--protein glycosyltransferase subunit STT3A [Homo sapiens]	STT3A	0.045443	1.03	0	1	0	NP_644670.1
109633028	serine/threonine-protein kinase MST4 isoform 2 [Homo sapiens]	MST4	0.045443	1.03	1	0	0	NP_057223.1
295842266	3,2-trans-enoyl-CoA isomerase, mitochondrial isoform 2 precursor [Homo sapiens]	ECI1	0.045443	1.03	1	0	0	NP_001035739.1
312922356	torsin-1A-interacting protein 2 isoform b [Homo sapiens]	TOR1AIP2	0.0468403	1.03	0	0	0	NP_001128246.1
42542379	serine/arginine repetitive matrix protein 1 [Homo sapiens]	SRRM1	0.0468403	1.03	1	1	0	NP_004255.2
18699732	45 kDa calcium-binding protein isoform 2 precursor [Homo sapiens]	SDF4	0.0482362	1.03	0	0	0	NP_078934.3
21361403	thioredoxin, mitochondrial precursor [Homo sapiens]	TXN2	0.0482362	1.03	0	0	0	NP_001070911.1
40353734	nucleophosmin isoform 2 [Homo sapiens]	NPM1	0.0482362	1.03	0	0	0	NP_006446.1
222831590	glutamyl-tRNA(Gln) amidotransferase subunit A homolog [Homo sapiens]	QRSL1	0.0482362	1.03	1	2	0	NP_001010.2
118498359	ribosomal L1 domain-containing protein 1 [Homo sapiens]	RSL1D1	0.0496308	1.04	1	2	1	NP_112485.1
11128019	cytochrome c [Homo sapiens]	CYCS	0.0496308	1.04	0	1	0	NP_002097.1
27477134	nuclear pore membrane glycoprotein 210 precursor [Homo sapiens]	NUP210	0.0496308	1.04	1	1	0	NP_150254.1
41393545	ras-related protein Rab-5C isoform b [Homo sapiens]	RAB5C	0.0496308	1.04	0	1	0	NP_005006.3
62865858	PHD finger protein 6 isoform 1 [Homo sapiens]	PHF6	0.0496308	1.04	1	0	0	NP_000843.1
5453549	peroxiredoxin-4 [Homo sapiens]	PRDX4	0.051024	1.04	0	0	0	NP_000117.1
319655561	alpha-aminoadipic semialdehyde dehydrogenase isoform 2 [Homo sapiens]	ALDH7A1	0.051024	1.04	0	0	0	NP_064601.3
5031579	A-kinase anchor protein 8 [Homo sapiens]	AKAP8	0.051024	1.04	0	1	0	NP_733829.1
9966805	ATP-dependent RNA helicase DDX24 [Homo sapiens]	DDX24	0.051024	1.04	3	0	0	NP_008974.5
14150124	protein LLP homolog [Homo sapiens]	LLPH	0.051024	1.04	0	1	0	NP_002931.2
38257153	3-hydroxyacyl-CoA dehydratase 2 [Homo sapiens]	PTPLB	0.051024	1.04	1	0	0	NP_055078.1
54792098	receptor tyrosine-protein kinase erbB-2 isoform b [Homo sapiens]	ERBB2	0.0524159	1.04	0	0	0	NP_002446.2
109452591	succinyl-CoA ligase [GDP-forming] subunit alpha, mitochondrial precursor [Homo sapiens]	SUCLG1	0.0524159	1.04	0	1	1	NP_006807.1
50511943	exosome complex exonuclease RRP40 isoform 1 [Homo sapiens]	EXOSC3	0.0524159	1.04	1	1	0	NP_077277.1
187828910	CD59 glycoprotein preproprotein [Homo sapiens]	CD59	0.0524159	1.04	0	2	0	NP_463459.1
274315853	hypothetical protein LOC284071 [Homo sapiens]	C17orf104	0.0524159	1.04	1	1	0	NP_067051.2
7706254	nucleolar protein 58 [Homo sapiens]	NOP58	0.0538064	1.04	0	0	0	NP_057632.2
14702171	DNA-directed RNA polymerase II subunit RPB3 [Homo sapiens]	POLR2C	0.0538064	1.04	0	0	0	NP_006462.1
41393561	cytosol aminopeptidase [Homo sapiens]	LAP3	0.0538064	1.04	0	0	0	NP_003866.1
33620775	kinectin isoform a [Homo sapiens]	KTN1	0.0538064	1.04	3	0	0	NP_002069.2
87196339	collagen alpha-1(VI) chain precursor [Homo sapiens]	COL6A1	0.0551957	1.04	0	1	0	NP_002769.1
142976675	striatin-3 isoform 2 [Homo sapiens]	STRN3	0.0551957	1.04	0	1	0	NP_001166996.1
151101292	thioredoxin-related transmembrane protein 1 precursor [Homo sapiens]	TMX1	0.0551957	1.04	2	1	0	NP_003135.2
4885371	histone H1.0 [Homo sapiens]	H1F0	0.0565835	1.04	0	0	0	NP_001166969.1
10092657	NADH dehydrogenase [ubiquinone] 1 alpha subcomplex subunit 12 [Homo sapiens]	NDUFA12	0.0565835	1.04	0	0	0	NP_004485.1
21396489	lon protease homolog, mitochondrial precursor [Homo sapiens]	LONP1	0.0565835	1.04	0	0	0	NP_009129.1
31543667	ATP-dependent RNA helicase SUPV3L1, mitochondrial precursor [Homo sapiens]	SUPV3L1	0.0565835	1.04	0	0	0	NP_006017.1
38788333	remodeling and spacing factor 1 [Homo sapiens]	RSF1	0.0565835	1.04	0	0	0	NP_001108585.2
86991440	serine/arginine-rich splicing factor 5 [Homo sapiens]	SRSF5	0.0565835	1.04	0	0	0	NP_001001659.1
187761345	acyl-CoA synthetase family member 3, mitochondrial precursor [Homo sapiens]	ACSF3	0.0565835	1.04	0	0	0	NP_001186623.1
315434223	GTP:AMP phosphotransferase, mitochondrial isoform c [Homo sapiens]	AK3	0.0565835	1.04	0	0	0	NP_001116841.1
4503253	dolichyl-diphosphooligosaccharide--protein glycosyltransferase subunit DAD1 [Homo sapiens]	DAD1	0.0565835	1.04	0	0	0	NP_079445.1
19923142	importin subunit beta-1 [Homo sapiens]	KPNB1	0.0565835	1.04	2	1	0	NP_000680.2
33942072	protein canopy homolog 3 precursor [Homo sapiens]	CNPY3	0.0565835	1.04	0	1	0	NP_659477.2
115298668	U5 small nuclear ribonucleoprotein 40 kDa protein [Homo sapiens]	SNRNP40	0.0565835	1.04	0	1	0	NP_060168.2
171460958	nucleolar protein 10 [Homo sapiens]	NOL10	0.0565835	1.04	1	1	0	NP_001171595.1
221136939	U4/U6 small nuclear ribonucleoprotein Prp31 [Homo sapiens]	PRPF31	0.0565835	1.04	2	0	0	NP_004517.2
224282119	SURP and G-patch domain-containing protein 2 [Homo sapiens]	SUGP2	0.0565835	1.04	1	0	0	NP_078805.3
40548332	coiled-coil domain-containing protein 137 [Homo sapiens]	CCDC137	0.0579701	1.04	0	0	0	NP_115882.1
148612842	interferon-induced transmembrane protein 3 [Homo sapiens]	IFITM3	0.0579701	1.04	0	0	0	NP_003892.2
307611943	hypothetical protein LOC146556 isoform 2 precursor [Homo sapiens]	C16orf89	0.0579701	1.04	0	0	0	NP_060377.1
283837894	zinc finger MYM-type protein 3 isoform 2 [Homo sapiens]	ZMYM3	0.0579701	1.04	3	0	0	NP_063940.1
13236587	transmembrane protein 43 [Homo sapiens]	TMEM43	0.0593553	1.04	0	0	0	NP_005310.1
85362737	hypothetical protein LOC54976 [Homo sapiens]	C20orf27	0.0593553	1.04	0	0	0	NP_001186192.1
114155142	nucleoprotein TPR [Homo sapiens]	TPR	0.0593553	1.04	5	3	1	NP_056046.1
36796743	monofunctional C1-tetrahydrofolate synthase, mitochondrial precursor [Homo sapiens]	MTHFD1L	0.0593553	1.04	1	0	0	NP_001159531.1
4502891	methylosome subunit pICln [Homo sapiens]	CLNS1A	0.0607392	1.04	2	0	0	NP_001077861.1
5032093	neutral amino acid transporter B(0) isoform 1 [Homo sapiens]	SLC1A5	0.0607392	1.04	0	1	0	NP_005388.2
24234750	interleukin enhancer-binding factor 3 isoform a [Homo sapiens]	ILF3	0.0607392	1.04	1	0	0	NP_055093.2
261278315	U3 small nucleolar RNA-associated protein 14 homolog A isoform 2 [Homo sapiens]	UTP14A	0.0607392	1.04	1	0	0	NP_002363.2
4505685	pyruvate dehydrogenase E1 component subunit alpha, somatic form, mitochondrial isoform 1 precursor [Homo sapiens]	PDHA1	0.0621217	1.04	0	0	0	NP_060066.2
8051631	RNA-binding protein Raly long isoform [Homo sapiens]	RALY	0.0621217	1.04	0	0	0	NP_005817.1
111607441	protein C16orf88 [Homo sapiens]	C16orf88	0.0621217	1.04	0	0	0	NP_006080.1
61742775	leucyl-cystinyl aminopeptidase isoform 2 [Homo sapiens]	LNPEP	0.0621217	1.04	3	0	0	NP_115679.2
119226260	calcium homeostasis endoplasmic reticulum protein [Homo sapiens]	CHERP	0.0621217	1.04	1	0	0	NP_006588.1
156151445	acyl-CoA synthetase family member 2, mitochondrial precursor [Homo sapiens]	ACSF2	0.0621217	1.04	2	0	0	NP_004323.2
9845511	ras-related C3 botulinum toxin substrate 1 isoform Rac1 [Homo sapiens]	RAC1	0.0635029	1.05	0	0	0	NP_001070867.1
14043072	heterogeneous nuclear ribonucleoproteins A2/B1 isoform B1 [Homo sapiens]	HNRNPA2B1	0.0635029	1.05	0	0	0	NP_000973.2
50962817	DNA-directed RNA polymerase I subunit RPA43 [Homo sapiens]	TWISTNB	0.0635029	1.05	0	0	0	NP_001034229.1
224586817	Golgi apparatus protein 1 isoform 3 [Homo sapiens]	GLG1	0.0635029	1.05	2	2	1	NP_066953.1
148664230	ankyrin repeat and LEM domain-containing protein 2 [Homo sapiens]	ANKLE2	0.0635029	1.05	1	0	0	NP_001976.1
5454090	translocon-associated protein subunit delta isoform 2 precursor [Homo sapiens]	SSR4	0.0648829	1.05	0	0	0	NP_056997.1
26667171	39S ribosomal protein L42, mitochondrial isoform a [Homo sapiens]	MRPL42	0.0648829	1.05	0	0	0	NP_004887.2
4502551	calumenin isoform a precursor [Homo sapiens]	CALU	0.0648829	1.05	2	2	0	NP_054737.1
28178838	isocitrate dehydrogenase [NAD] subunit gamma, mitochondrial isoform b precursor [Homo sapiens]	IDH3G	0.0648829	1.05	0	1	0	NP_006744.2
109715858	calcium-regulated heat stable protein 1 [Homo sapiens]	CARHSP1	0.0648829	1.05	0	1	0	XP_003119920.1
302129652	annexin A6 isoform 2 [Homo sapiens]	ANXA6	0.0648829	1.05	1	1	0	NP_001142.2
7705375	zinc finger and BTB domain-containing protein 7A [Homo sapiens]	ZBTB7A	0.0662614	1.05	0	0	0	NP_056138.1
33946291	lysophosphatidylcholine acyltransferase 1 [Homo sapiens]	LPCAT1	0.0662614	1.05	1	0	0	NP_001182465.1
4502859	cyclin-dependent kinases regulatory subunit 2 [Homo sapiens]	CKS2	0.0676387	1.05	0	0	0	NP_001627.2
102469037	transcription factor jun-D [Homo sapiens]	JUND	0.0676387	1.05	0	0	0	NP_000960.2
226509740	splicing factor, arginine/serine-rich 19 [Homo sapiens]	SCAF1	0.0676387	1.05	0	0	0	NP_115725.1
251831110	cytochrome c oxidase subunit II [Homo sapiens]	COX2	0.0676387	1.05	0	0	0	NP_078932.2
30581135	structural maintenance of chromosomes protein 1A [Homo sapiens]	SMC1A	0.0676387	1.05	2	3	1	NP_942590.1
70980549	protein RRP5 homolog [Homo sapiens]	PDCD11	0.0676387	1.05	1	0	0	NP_075391.3
5902102	small nuclear ribonucleoprotein Sm D1 [Homo sapiens]	SNRPD1	0.0690147	1.05	0	0	0	NP_003225.2
7706057	39S ribosomal protein L27, mitochondrial [Homo sapiens]	MRPL27	0.0690147	1.05	0	0	0	NP_001093640.1
13569962	ras-related protein Rab-1B [Homo sapiens]	RAB1B	0.0690147	1.05	0	0	0	NP_056255.2
21704265	protein max isoform c [Homo sapiens]	MAX	0.0690147	1.05	0	0	0	NP_001670.1
37594471	3-hydroxyisobutyryl-CoA hydrolase, mitochondrial isoform 1 precursor [Homo sapiens]	HIBCH	0.0690147	1.05	0	0	0	NP_002078.1
51873036	2-oxoglutarate dehydrogenase, mitochondrial isoform 1 precursor [Homo sapiens]	OGDH	0.0690147	1.05	0	0	0	NP_998731.1
118918403	nesprin-2 isoform 1 [Homo sapiens]	SYNE2	0.0690147	1.05	0	0	0	NP_001139761.1
30089919	polymerase delta-interacting protein 3 isoform 2 [Homo sapiens]	POLDIP3	0.0690147	1.05	0	2	0	NP_005436.1
90193619	zinc finger protein 384 isoform c [Homo sapiens]	ZNF384	0.0690147	1.05	0	1	0	NP_002907.1
186928847	cirhin [Homo sapiens]	CIRH1A	0.0703893	1.05	0	0	0	NP_055545.1
4503579	band 4.1-like protein 2 isoform a [Homo sapiens]	EPB41L2	0.0703893	1.05	1	1	0	NP_001029196.1
50726968	microfibrillar-associated protein 1 [Homo sapiens]	MFAP1	0.0703893	1.05	0	1	0	NP_005706.1
194097392	Golgin subfamily A member 2 [Homo sapiens]	GOLGA2	0.0703893	1.05	2	0	0	NP_055744.2
10863899	numb-like protein [Homo sapiens]	NUMBL	0.0717627	1.05	0	0	0	NP_057392.1
259906020	apoptotic chromatin condensation inducer in the nucleus isoform 3 [Homo sapiens]	ACIN1	0.0717627	1.05	1	0	0	NP_000687.3
4502281	sodium/potassium-transporting ATPase subunit beta-3 [Homo sapiens]	ATP1B3	0.0731347	1.05	0	0	0	NP_001002877.1
4885381	histone H1.5 [Homo sapiens]	HIST1H1B	0.0731347	1.05	0	0	0	NP_006752.1
5729820	phenylalanyl-tRNA synthetase, mitochondrial precursor [Homo sapiens]	FARS2	0.0731347	1.05	1	0	0	NP_001180346.1
11559927	28S ribosomal protein S14, mitochondrial [Homo sapiens]	MRPS14	0.0731347	1.05	1	0	0	NP_061955.1
19557702	surfeit locus protein 6 [Homo sapiens]	SURF6	0.0745054	1.05	0	0	0	NP_005539.1
116642885	probable hydrolase PNKD isoform 3 precursor [Homo sapiens]	PNKD	0.0745054	1.05	0	0	0	NP_001138908.1
83641896	nucleotide exchange factor SIL1 precursor [Homo sapiens]	SIL1	0.0745054	1.05	0	1	0	NP_003282.2
7661806	39S ribosomal protein L15, mitochondrial precursor [Homo sapiens]	MRPL15	0.0758749	1.05	0	1	0	NP_006398.1
102467484	sphingomyelin phosphodiesterase 4 isoform 1 [Homo sapiens]	SMPD4	0.0758749	1.05	1	0	0	NP_057128.2
13027378	glucosamine-6-phosphate isomerase 1 [Homo sapiens]	GNPDA1	0.077243	1.06	0	0	0	NP_036592.1
24797097	pyrroline-5-carboxylate reductase 1, mitochondrial isoform 1 [Homo sapiens]	PYCR1	0.077243	1.06	0	0	0	NP_060518.1
50959176	endoplasmic reticulum-Golgi intermediate compartment protein 2 [Homo sapiens]	ERGIC2	0.077243	1.06	0	0	0	NP_008938.2
34147522	chaperone activity of bc1 complex-like, mitochondrial precursor [Homo sapiens]	ADCK3	0.0786098	1.06	0	0	0	NP_060592.2
4503023	carnitine O-palmitoyltransferase 2, mitochondrial precursor [Homo sapiens]	CPT2	0.0786098	1.06	1	0	0	NP_002195.1
4557888	keratin, type I cytoskeletal 18 [Homo sapiens]	KRT18	0.0786098	1.06	1	0	0	NP_004784.2
320202986	alcohol dehydrogenase [NADP+] [Homo sapiens]	AKR1A1	0.0799754	1.06	0	0	0	NP_005862.1
18093112	ESF1 homolog [Homo sapiens]	ESF1	0.0799754	1.06	1	0	0	NP_079423.1
190014601	protein jagunal homolog 1 [Homo sapiens]	JAGN1	0.0813396	1.06	0	0	0	NP_110382.3
27436891	GDP-fucose protein O-fucosyltransferase 1 isoform 2 precursor [Homo sapiens]	POFUT1	0.0813396	1.06	0	1	1	NP_006467.4
145580615	protein KRI1 homolog [Homo sapiens]	KRI1	0.0813396	1.06	3	0	0	NP_002874.1
13027604	28S ribosomal protein S34, mitochondrial [Homo sapiens]	MRPS34	0.0827026	1.06	0	0	0	NP_115487.2
21218438	transcriptional repressor p66-beta [Homo sapiens]	GATAD2B	0.0827026	1.06	0	0	0	NP_060945.2
23308577	D-3-phosphoglycerate dehydrogenase [Homo sapiens]	PHGDH	0.0827026	1.06	1	0	0	NP_060628.2
25777734	delta-1-pyrroline-5-carboxylate dehydrogenase, mitochondrial isoform a precursor [Homo sapiens]	ALDH4A1	0.0827026	1.06	1	0	0	NP_002782.1
51599156	chromodomain-helicase-DNA-binding protein 4 [Homo sapiens]	CHD4	0.0827026	1.06	2	0	0	NP_852480.1
56699480	vacuolar fusion protein CCZ1 homolog [Homo sapiens]	CCZ1	0.0827026	1.06	1	1	0	NP_054884.1
115529451	nucleolar transcription factor 1 isoform b [Homo sapiens]	UBTF	0.0827026	1.06	0	1	0	NP_112240.1
5803165	protein transport protein Sec61 subunit beta [Homo sapiens]	SEC61B	0.0840643	1.06	0	0	0	NP_001035937.1
19224660	protein kinase C and casein kinase substrate in neurons protein 3 [Homo sapiens]	PACSIN3	0.0840643	1.06	1	0	0	NP_001743.1
19923855	synapse-associated protein 1 [Homo sapiens]	SYAP1	0.0840643	1.06	1	1	0	NP_002813.2
82659109	E3 ubiquitin-protein ligase UBR4 [Homo sapiens]	UBR4	0.0840643	1.06	8	0	0	NP_055209.2
242117893	apoptosis regulator BAX isoform sigma [Homo sapiens]	BAX	0.0840643	1.06	1	0	0	NP_009106.1
4505145	NAD-dependent malic enzyme, mitochondrial isoform 1 precursor [Homo sapiens]	ME2	0.0854247	1.06	0	1	0	NP_659486.2
4505343	nuclear cap-binding protein subunit 1 [Homo sapiens]	NCBP1	0.0854247	1.06	1	0	0	NP_001091972.1
13540606	caseinolytic peptidase B protein homolog [Homo sapiens]	CLPB	0.0854247	1.06	1	0	0	NP_071761.1
31657094	actin-binding protein anillin [Homo sapiens]	ANLN	0.0854247	1.06	2	0	0	NP_056229.2
55749804	endoplasmic reticulum metallopeptidase 1 [Homo sapiens]	ERMP1	0.0854247	1.06	2	3	0	NP_001123955.1
154759257	ATP-dependent RNA helicase DDX51 [Homo sapiens]	DDX51	0.0854247	1.06	1	3	0	NP_001959.1
27545315	translational activator of cytochrome c oxidase 1 [Homo sapiens]	TACO1	0.0867838	1.06	0	0	0	NP_000512.1
32483377	thioredoxin-dependent peroxide reductase, mitochondrial isoform b [Homo sapiens]	PRDX3	0.0867838	1.06	1	0	0	NP_004319.1
40288276	7,8-dihydro-8-oxoguanine triphosphatase isoform p18 [Homo sapiens]	NUDT1	0.0867838	1.06	0	1	0	NP_542193.3
155030216	sister chromatid cohesion protein PDS5 homolog A isoform 1 [Homo sapiens]	PDS5A	0.0867838	1.06	3	0	0	NP_001017369.1
45359846	ras GTPase-activating protein-binding protein 2 isoform b [Homo sapiens]	G3BP2	0.0881416	1.06	0	0	0	NP_001369.1
4507961	tristetraprolin [Homo sapiens]	ZFP36	0.0881416	1.06	0	1	1	NP_005782.1
167466231	cytochrome P450 27C1 [Homo sapiens]	CYP27C1	0.0881416	1.06	1	1	1	NP_001165335.1
6005884	translocon-associated protein subunit gamma [Homo sapiens]	SSR3	0.0881416	1.06	0	1	0	NP_004490.2
54112117	splicing factor 3B subunit 1 isoform 1 [Homo sapiens]	SF3B1	0.0881416	1.06	0	1	0	NP_004539.1
256222019	ras-related protein Rab-10 [Homo sapiens]	RAB10	0.0881416	1.06	0	0	0	NP_002083.3
310124648	PREDICTED: serine/arginine-rich splicing factor 10-like [Homo sapiens]	LOC100505793	0.0894982	1.06	0	0	0	NP_659419.3
4826952	26S proteasome non-ATPase regulatory subunit 5 [Homo sapiens]	PSMD5	0.0894982	1.06	2	1	0	NP_612409.1
5803023	vesicular integral-membrane protein VIP36 precursor [Homo sapiens]	LMAN2	0.0894982	1.06	1	1	0	NP_444295.1
4759156	U1 small nuclear ribonucleoprotein A [Homo sapiens]	SNRPA	0.0908534	1.07	0	0	0	NP_659540.1
315434216	28S ribosomal protein S29, mitochondrial isoform 3 [Homo sapiens]	DAP3	0.0908534	1.07	0	0	0	NP_036452.1
20070344	threonyl-tRNA synthetase, mitochondrial precursor [Homo sapiens]	TARS2	0.0908534	1.07	1	0	0	NP_001075028.1
40254924	leucine-rich repeat-containing protein 59 [Homo sapiens]	LRRC59	0.0908534	1.07	1	1	0	NP_005611.1
223029410	talin-1 [Homo sapiens]	TLN1	0.0908534	1.07	2	0	0	NP_001096618.1
4826972	RNA-binding protein 8A [Homo sapiens]	RBM8A	0.0922074	1.07	1	0	0	NP_001131074.1
24497609	nuclear pore glycoprotein p62 [Homo sapiens]	NUP62	0.0922074	1.07	4	0	0	NP_005728.2
296179429	hydroxyacyl-coenzyme A dehydrogenase, mitochondrial isoform 2 precursor [Homo sapiens]	HADH	0.0922074	1.07	2	0	0	NP_061982.3
62414289	vimentin [Homo sapiens]	VIM	0.0935602	1.07	0	0	0	NP_110425.1
4504061	N-acetylglucosamine-6-sulfatase precursor [Homo sapiens]	GNS	0.0935602	1.07	0	1	0	NP_004703.1
70167113	double-stranded RNA-specific adenosine deaminase isoform d [Homo sapiens]	ADAR	0.0935602	1.07	1	0	0	NP_003667.1
23200008	abhydrolase domain-containing protein 11 isoform 1 [Homo sapiens]	ABHD11	0.0949116	1.07	0	0	0	NP_006577.2
237820620	glutamate-rich WD repeat-containing protein 1 [Homo sapiens]	GRWD1	0.0949116	1.07	0	0	0	NP_001187.1
4507797	ubiquitin-conjugating enzyme E2 variant 2 [Homo sapiens]	UBE2V2	0.0962619	1.07	0	0	0	NP_001018170.1
5803149	transmembrane emp24 domain-containing protein 2 precursor [Homo sapiens]	TMED2	0.0962619	1.07	0	0	0	NP_001734.1
23111038	sorting nexin-2 [Homo sapiens]	SNX2	0.0976108	1.07	0	0	0	NP_001395.1
14141161	heterogeneous nuclear ribonucleoprotein U isoform b [Homo sapiens]	HNRNPU	0.0976108	1.07	1	0	0	NP_055629.1
224451135	splicing factor, arginine/serine-rich 15 isoform 3 [Homo sapiens]	SCAF4	0.0976108	1.07	1	1	0	NP_005964.3
4502205	ADP-ribosylation factor 4 [Homo sapiens]	ARF4	0.0989585	1.07	0	0	0	NP_001180272.1
19923748	dihydrolipoyllysine-residue succinyltransferase component of 2-oxoglutarate dehydrogenase complex, mitochondrial [Homo sapiens]	DLST	0.0989585	1.07	0	0	0	NP_064628.1
26051229	39S ribosomal protein L28, mitochondrial precursor [Homo sapiens]	MRPL28	0.0989585	1.07	0	0	0	NP_001129243.1
41393599	coproporphyrinogen-III oxidase, mitochondrial precursor [Homo sapiens]	CPOX	0.0989585	1.07	0	0	0	NP_001007226.1
4501915	disintegrin and metalloproteinase domain-containing protein 9 precursor [Homo sapiens]	ADAM9	0.0989585	1.07	1	0	0	NP_061118.1
94681057	tyrosyl-tRNA synthetase, mitochondrial precursor [Homo sapiens]	YARS2	0.0989585	1.07	3	0	0	NP_005723.2
4507285	syntaxin-10 [Homo sapiens]	STX10	0.100305	1.07	1	0	0	NP_055580.1
11055992	retinoid-inducible serine carboxypeptidase precursor [Homo sapiens]	SCPEP1	0.100305	1.07	2	0	0	NP_001135770.1
41055989	M-phase phosphoprotein 8 [Homo sapiens]	MPHOSPH8	0.100305	1.07	1	0	0	NP_006364.2
7705997	transmembrane protein 85 [Homo sapiens]	TMEM85	0.10165	1.07	0	0	0	NP_060376.2
13376737	coenzyme Q-binding protein COQ10 homolog B, mitochondrial precursor [Homo sapiens]	COQ10B	0.10165	1.07	0	0	0	NP_054899.2
78711824	succinate dehydrogenase cytochrome b560 subunit, mitochondrial isoform 4 precursor [Homo sapiens]	SDHC	0.10165	1.07	0	0	0	NP_055456.2
4503377	dihydropyrimidinase-related protein 2 isoform 2 [Homo sapiens]	DPYSL2	0.10165	1.07	1	1	0	NP_057460.3
83776598	mitochondrial antiviral-signaling protein [Homo sapiens]	MAVS	0.10165	1.07	2	3	0	NP_996561.1
310110345	PREDICTED: adenylate kinase isoenzyme 4, mitochondrial-like [Homo sapiens]	LOC100507855	0.102994	1.07	0	0	0	NP_001001563.1
21614538	serine protease HTRA2, mitochondrial isoform 2 [Homo sapiens]	HTRA2	0.102994	1.07	0	1	0	NP_000995.1
38605733	nucleoporin Nup43 [Homo sapiens]	NUP43	0.102994	1.07	0	1	0	NP_115881.3
119874209	OCIA domain-containing protein 1 isoform 3 [Homo sapiens]	OCIAD1	0.104337	1.08	0	0	0	NP_001136120.1
238859597	RNA-binding protein 34 isoform 1 [Homo sapiens]	RBM34	0.104337	1.08	0	0	0	NP_001129505.1
4557809	ornithine aminotransferase, mitochondrial isoform 1 precursor [Homo sapiens]	OAT	0.104337	1.08	1	0	0	NP_060917.1
14210536	tubulin beta-6 chain [Homo sapiens]	TUBB6	0.105678	1.08	0	0	0	NP_002758.1
45827739	vitamin K epoxide reductase complex subunit 1 isoform 2 [Homo sapiens]	VKORC1	0.105678	1.08	0	0	0	NP_001001521.1
169404009	translocon-associated protein subunit alpha precursor [Homo sapiens]	SSR1	0.105678	1.08	0	3	0	NP_055644.2
282403491	protein LAS1 homolog isoform 2 [Homo sapiens]	LAS1L	0.105678	1.08	2	0	0	NP_001651.1
20336290	putative ATP-dependent RNA helicase DHX30 isoform 2 [Homo sapiens]	DHX30	0.107018	1.08	0	0	0	NP_003070.3
45827729	protein scribble homolog isoform b [Homo sapiens]	SCRIB	0.107018	1.08	0	0	0	NP_060311.1
94429050	vesicle-trafficking protein SEC22b [Homo sapiens]	SEC22B	0.107018	1.08	0	0	0	NP_004035.2
25188179	voltage-dependent anion-selective channel protein 3 isoform b [Homo sapiens]	VDAC3	0.107018	1.08	1	0	0	NP_004542.1
30026034	adenosine 3'-phospho 5'-phosphosulfate transporter 1 [Homo sapiens]	SLC35B2	0.107018	1.08	1	0	0	NP_006136.1
145275216	kinesin-like protein KIF2B [Homo sapiens]	KIF2B	0.107018	1.08	1	0	0	NP_056039.2
188536047	SWI/SNF complex subunit SMARCC1 [Homo sapiens]	SMARCC1	0.107018	1.08	2	2	0	NP_066951.1
209413738	dolichyl-diphosphooligosaccharide--protein glycosyltransferase subunit 2 isoform 2 precursor [Homo sapiens]	RPN2	0.107018	1.08	3	0	0	NP_002898.2
40807485	pre-mRNA-processing factor 6 [Homo sapiens]	PRPF6	0.108357	1.08	0	0	0	NP_002780.1
157779135	succinyl-CoA ligase [GDP-forming] subunit beta, mitochondrial isoform 2 precursor [Homo sapiens]	SUCLG2	0.108357	1.08	0	0	0	NP_079337.2
8922944	protein lin-7 homolog C [Homo sapiens]	LIN7C	0.108357	1.08	0	3	0	NP_006161.2
13129092	transmembrane protein 109 precursor [Homo sapiens]	TMEM109	0.108357	1.08	1	0	0	NP_036221.2
38327625	citrate synthase, mitochondrial precursor [Homo sapiens]	CS	0.108357	1.08	1	1	0	NP_061848.2
47519420	reticulon-4-interacting protein 1, mitochondrial precursor [Homo sapiens]	RTN4IP1	0.108357	1.08	0	0	0	NP_001093869.1
7019319	activator of basal transcription 1 [Homo sapiens]	ABT1	0.109695	1.08	0	0	0	NP_001137442.1
8922601	ADP-ribosylation factor-like protein 8B [Homo sapiens]	ARL8B	0.109695	1.08	0	0	0	NP_001011553.2
14269586	28S ribosomal protein S26, mitochondrial precursor [Homo sapiens]	MRPS26	0.109695	1.08	0	0	0	NP_056235.4
6005747	E3 ubiquitin-protein ligase RING2 [Homo sapiens]	RNF2	0.109695	1.08	1	0	0	NP_003079.1
33946327	nuclear pore complex protein Nup214 [Homo sapiens]	NUP214	0.109695	1.08	4	0	0	NP_060272.3
42476296	tropomyosin beta chain isoform 1 [Homo sapiens]	TPM2	0.109695	1.08	2	0	0	NP_057307.2
116268097	beta-1,3-galactosyltransferase 6 [Homo sapiens]	B3GALT6	0.109695	1.08	0	1	0	NP_112533.1
157168362	purine nucleoside phosphorylase [Homo sapiens]	PNP	0.109695	1.08	0	1	0	NP_002777.1
133925799	RNA binding protein fox-1 homolog 2 isoform 3 [Homo sapiens]	RBFOX2	0.111031	1.08	0	0	0	NP_001035810.1
158534059	formin-binding protein 4 [Homo sapiens]	FNBP4	0.111031	1.08	2	1	0	NP_060596.2
4506007	serine/threonine-protein phosphatase PP1-gamma catalytic subunit [Homo sapiens]	PPP1CC	0.112367	1.08	0	0	0	NP_853536.2
8923942	H/ACA ribonucleoprotein complex subunit 3 [Homo sapiens]	NOP10	0.112367	1.08	0	0	0	NP_115784.1
238776801	armadillo repeat-containing protein 10 isoform f [Homo sapiens]	ARMC10	0.112367	1.08	0	0	0	NP_004231.1
5803137	putative RNA-binding protein 3 [Homo sapiens]	RBM3	0.112367	1.08	1	1	0	NP_005329.3
8923398	cell growth-regulating nucleolar protein [Homo sapiens]	LYAR	0.112367	1.08	1	0	0	NP_005960.1
27477041	AP-2 complex subunit alpha-2 [Homo sapiens]	AP2A2	0.112367	1.08	1	0	0	NP_005907.3
76781492	RNA exonuclease 4 [Homo sapiens]	REXO4	0.112367	1.08	1	0	0	NP_079106.3
4759098	transformer-2 protein homolog beta [Homo sapiens]	TRA2B	0.1137	1.08	0	0	0	NP_116558.1
63253298	spermidine synthase [Homo sapiens]	SRM	0.1137	1.08	0	0	0	NP_114403.1
298919181	nuclear receptor corepressor 1 isoform 3 [Homo sapiens]	NCOR1	0.1137	1.08	3	1	1	NP_001182375.1
22547134	39S ribosomal protein L37, mitochondrial precursor [Homo sapiens]	MRPL37	0.1137	1.08	2	0	0	NP_001002762.2
62241022	ATP-dependent RNA helicase DDX19B isoform 3 [Homo sapiens]	DDX19B	0.115033	1.08	0	0	0	NP_004036.1
5729794	CUGBP Elav-like family member 1 isoform 1 [Homo sapiens]	CELF1	0.115033	1.08	0	1	0	NP_005678.3
146134388	YLP motif-containing protein 1 [Homo sapiens]	YLPM1	0.115033	1.08	2	1	0	NP_005713.1
28178821	isocitrate dehydrogenase [NAD] subunit beta, mitochondrial isoform a precursor [Homo sapiens]	IDH3B	0.116365	1.08	0	0	0	NP_003841.1
215599070	evolutionarily conserved signaling intermediate in Toll pathway, mitochondrial isoform 3 [Homo sapiens]	ECSIT	0.116365	1.08	0	0	0	NP_057123.1
4758768	NADH dehydrogenase [ubiquinone] 1 alpha subcomplex subunit 10, mitochondrial precursor [Homo sapiens]	NDUFA10	0.116365	1.08	1	2	0	NP_068758.3
26667177	39S ribosomal protein L46, mitochondrial precursor [Homo sapiens]	MRPL46	0.116365	1.08	1	0	0	NP_001839.2
61743954	neuroblast differentiation-associated protein AHNAK isoform 1 [Homo sapiens]	AHNAK	0.116365	1.08	8	1	0	NP_001164633.1
23111062	splicing factor, suppressor of white-apricot homolog [Homo sapiens]	SFSWAP	0.117695	1.09	1	0	0	NP_037364.1
38788372	intron-binding protein aquarius [Homo sapiens]	AQR	0.117695	1.09	2	1	0	NP_060058.1
296531406	ES1 protein homolog, mitochondrial isoform Ia precursor [Homo sapiens]	C21orf33	0.117695	1.09	1	0	0	NP_065142.2
4501867	aconitate hydratase, mitochondrial precursor [Homo sapiens]	ACO2	0.119024	1.09	0	0	0	NP_114127.3
9845297	diablo homolog, mitochondrial isoform 1 precursor [Homo sapiens]	DIABLO	0.119024	1.09	0	0	0	NP_057164.3
127139033	NADPH--cytochrome P450 reductase [Homo sapiens]	POR	0.119024	1.09	0	0	0	NP_001753.1
4885281	glutamate dehydrogenase 1, mitochondrial precursor [Homo sapiens]	GLUD1	0.119024	1.09	1	0	0	NP_003092.4
8051608	heme oxygenase 2 [Homo sapiens]	HMOX2	0.119024	1.09	1	0	0	NP_001010972.1
30089997	actin-like protein 6A isoform 2 [Homo sapiens]	ACTL6A	0.119024	1.09	1	0	0	NP_663729.1
4503607	electron transfer flavoprotein subunit alpha, mitochondrial isoform a [Homo sapiens]	ETFA	0.120352	1.09	0	0	0	NP_060297.1
14249398	PHD finger-like domain-containing protein 5A [Homo sapiens]	PHF5A	0.120352	1.09	0	0	0	NP_005796.1
19743875	fumarate hydratase, mitochondrial precursor [Homo sapiens]	FH	0.120352	1.09	1	0	0	NP_055077.2
24308039	E3 UFM1-protein ligase 1 [Homo sapiens]	KIAA0776	0.120352	1.09	1	0	0	NP_001782.1
88900491	neutral alpha-glucosidase AB isoform 3 [Homo sapiens]	GANAB	0.120352	1.09	0	1	0	NP_001122386.1
115430235	E3 ubiquitin-protein ligase UHRF1 isoform 1 [Homo sapiens]	UHRF1	0.120352	1.09	0	1	0	NP_000959.2
194097365	putative rRNA methyltransferase 3 [Homo sapiens]	FTSJ3	0.120352	1.09	4	0	0	NP_004710.2
4502801	regulator of chromosome condensation isoform c [Homo sapiens]	RCC1	0.121679	1.09	0	0	0	NP_055204.2
24497453	nuclear pore complex protein Nup88 [Homo sapiens]	NUP88	0.121679	1.09	0	0	0	NP_002618.1
319996623	putative RNA-binding protein 15 isoform 2 [Homo sapiens]	RBM15	0.121679	1.09	0	0	0	NP_060585.2
4507499	nucleolysin TIAR isoform 1 [Homo sapiens]	TIAL1	0.121679	1.09	2	0	0	NP_066018.1
73486658	aspartate aminotransferase, mitochondrial precursor [Homo sapiens]	GOT2	0.121679	1.09	1	1	0	NP_057306.2
125656165	THO complex subunit 2 [Homo sapiens]	THOC2	0.121679	1.09	3	1	0	NP_001295.2
62526022	protein CutA isoform 2 [Homo sapiens]	CUTA	0.123004	1.09	0	0	0	NP_006331.1
24308227	zinc finger protein 687 [Homo sapiens]	ZNF687	0.123004	1.09	0	1	0	NP_689481.2
100913206	ATP-dependent RNA helicase A [Homo sapiens]	DHX9	0.123004	1.09	5	0	0	NP_057018.1
51173724	bystin [Homo sapiens]	BYSL	0.124328	1.09	0	0	0	NP_849193.1
221139815	LEM domain-containing protein 2 isoform 2 [Homo sapiens]	LEMD2	0.124328	1.09	0	0	0	NP_005737.1
45267832	FAST kinase domain-containing protein 2 [Homo sapiens]	FASTKD2	0.124328	1.09	2	0	0	NP_149119.1
300388142	transcriptional repressor CTCF isoform 2 [Homo sapiens]	CTCF	0.124328	1.09	1	0	0	NP_859056.2
70906430	AP-2 complex subunit sigma isoform AP17 [Homo sapiens]	AP2S1	0.125651	1.09	1	0	0	NP_877423.1
169790849	cytochrome c-type heme lyase [Homo sapiens]	HCCS	0.125651	1.09	0	2	0	NP_001104567.1
7657381	pre-mRNA-processing factor 19 [Homo sapiens]	PRPF19	0.126973	1.09	0	0	0	NP_006392.1
19913416	AP-2 complex subunit alpha-1 isoform 2 [Homo sapiens]	AP2A1	0.126973	1.09	0	0	0	NP_003104.2
4504315	histone H4 [Homo sapiens]	HIST1H4E	0.128293	1.09	0	0	0	NP_055942.1
6857826	RNA-binding protein with serine-rich domain 1 [Homo sapiens]	RNPS1	0.128293	1.09	0	0	0	NP_001017992.1
86792661	dipeptidyl peptidase 3 [Homo sapiens]	DPP3	0.128293	1.09	0	0	0	NP_665906.1
31652228	39S ribosomal protein L21, mitochondrial isoform a [Homo sapiens]	MRPL21	0.128293	1.09	1	0	0	NP_001988.1
34147630	elongation factor Tu, mitochondrial precursor [Homo sapiens]	TUFM	0.128293	1.09	2	1	0	NP_001003810.1
79750824	niban-like protein 1 isoform 2 [Homo sapiens]	FAM129B	0.128293	1.09	3	0	0	NP_005617.2
4507793	ubiquitin-conjugating enzyme E2 N [Homo sapiens]	UBE2N	0.129613	1.09	0	0	0	NP_001026881.1
10835049	transforming protein RhoA precursor [Homo sapiens]	RHOA	0.129613	1.09	0	0	0	NP_001609.2
40254986	hydroxysteroid dehydrogenase-like protein 2 isoform 1 [Homo sapiens]	HSDL2	0.129613	1.09	0	0	0	NP_001001937.1
19718759	myoferlin isoform b [Homo sapiens]	MYOF	0.129613	1.09	4	0	0	NP_006254.1
38201714	ELAV-like protein 1 [Homo sapiens]	ELAVL1	0.129613	1.09	0	2	0	NP_055491.1
194097323	enoyl-CoA hydratase, mitochondrial precursor [Homo sapiens]	ECHS1	0.129613	1.09	0	1	0	NP_001093.1
225903430	mannosyl-oligosaccharide glucosidase isoform 2 [Homo sapiens]	MOGS	0.129613	1.09	2	0	0	NP_001071.1
20149498	ferritin light chain [Homo sapiens]	FTL	0.130931	1.1	0	0	0	NP_680781.1
13654274	fumarylacetoacetate hydrolase domain-containing protein 1 isoform 2 [Homo sapiens]	FAHD1	0.130931	1.1	0	1	0	NP_009200.2
23199974	pre-mRNA-splicing regulator WTAP isoform 2 [Homo sapiens]	WTAP	0.130931	1.1	2	0	0	NP_006827.1
156564403	pyruvate dehydrogenase E1 component subunit beta, mitochondrial isoform 1 precursor [Homo sapiens]	PDHB	0.130931	1.1	1	0	0	NP_001261.2
217330644	ribosome biogenesis protein WDR12 [Homo sapiens]	WDR12	0.130931	1.1	2	0	0	NP_003581.1
4503337	H/ACA ribonucleoprotein complex subunit 4 isoform 1 [Homo sapiens]	DKC1	0.132248	1.1	0	0	0	NP_055412.2
8393259	tuftelin-interacting protein 11 [Homo sapiens]	TFIP11	0.133564	1.1	0	0	0	NP_000080.2
56699409	heterogeneous nuclear ribonucleoprotein G isoform 1 [Homo sapiens]	RBMX	0.133564	1.1	0	0	0	NP_569710.2
109809737	general transcription factor IIH subunit 2-like protein [Homo sapiens]	GTF2H2D	0.133564	1.1	0	0	0	NP_060791.3
229577273	BUD13 homolog isoform 2 [Homo sapiens]	BUD13	0.133564	1.1	0	0	0	NP_002991.2
29501813	ubiquitin fusion degradation protein 1 homolog isoform A [Homo sapiens]	UFD1L	0.133564	1.1	2	0	0	NP_001159418.1
4502105	annexin A4 [Homo sapiens]	ANXA4	0.134878	1.1	0	0	0	NP_006614.2
7242140	ATP-dependent Clp protease ATP-binding subunit clpX-like, mitochondrial precursor [Homo sapiens]	CLPX	0.134878	1.1	0	0	0	NP_037506.2
73747917	antigen peptide transporter 2 isoform 2 [Homo sapiens]	TAP2	0.134878	1.1	0	0	0	NP_114415.1
7706495	dnaJ homolog subfamily B member 11 precursor [Homo sapiens]	DNAJB11	0.134878	1.1	0	1	0	NP_001016.1
119393891	lysosomal alpha-glucosidase preproprotein [Homo sapiens]	GAA	0.134878	1.1	1	0	0	NP_006108.2
22035590	39S ribosomal protein L24, mitochondrial precursor [Homo sapiens]	MRPL24	0.136191	1.1	0	0	0	NP_003124.1
11321585	guanine nucleotide-binding protein G(I)/G(S)/G(T) subunit beta-1 [Homo sapiens]	GNB1	0.136191	1.1	1	1	0	NP_001177951.1
19557691	surfeit locus protein 4 [Homo sapiens]	SURF4	0.136191	1.1	0	1	0	NP_078867.2
33620716	E3 ubiquitin-protein ligase RBBP6 isoform 2 [Homo sapiens]	RBBP6	0.136191	1.1	5	0	0	NP_004689.1
73695475	HEAT repeat-containing protein 1 [Homo sapiens]	HEATR1	0.136191	1.1	3	0	0	NP_001005862.1
226491502	probable asparaginyl-tRNA synthetase, mitochondrial precursor [Homo sapiens]	NARS2	0.136191	1.1	0	1	0	NP_001073331.1
5031755	heterogeneous nuclear ribonucleoprotein R isoform 2 [Homo sapiens]	HNRNPR	0.137504	1.1	0	0	0	NP_002065.1
194239643	cyclic AMP-dependent transcription factor ATF-7 isoform 3 [Homo sapiens]	ATF7	0.137504	1.1	0	0	0	NP_071757.4
19923231	ras-related protein Rab-6A isoform a [Homo sapiens]	RAB6A	0.137504	1.1	1	0	0	NP_005863.1
225703037	lysophospholipid acyltransferase 7 isoform 3 [Homo sapiens]	MBOAT7	0.137504	1.1	1	0	0	NP_066979.2
259013537	thymidylate kinase isoform 2 [Homo sapiens]	DTYMK	0.137504	1.1	1	1	0	NP_000302.1
50593008	transmembrane BAX inhibitor motif-containing protein 1 [Homo sapiens]	TMBIM1	0.138814	1.1	0	0	0	NP_001026859.1
94721354	bifunctional methylenetetrahydrofolate dehydrogenase/cyclohydrolase, mitochondrial precursor [Homo sapiens]	MTHFD2	0.138814	1.1	0	0	0	NP_116190.2
122937227	U2-associated protein SR140 [Homo sapiens]	U2SURP	0.138814	1.1	0	0	0	NP_004389.2
193794826	NADH-cytochrome b5 reductase 3 isoform 2 [Homo sapiens]	CYB5R3	0.138814	1.1	0	0	0	NP_891552.1
4758302	enhancer of rudimentary homolog [Homo sapiens]	ERH	0.138814	1.1	1	0	0	NP_001900.1
9966881	nuclear pore complex protein Nup107 [Homo sapiens]	NUP107	0.138814	1.1	1	0	0	NP_620150.1
4826848	NADH dehydrogenase [ubiquinone] 1 alpha subcomplex subunit 5 [Homo sapiens]	NDUFA5	0.140124	1.1	0	0	0	NP_057040.2
117647226	mitochondrial ribonuclease P protein 1 [Homo sapiens]	RG9MTD1	0.140124	1.1	0	0	0	NP_001182408.1
4758874	transmembrane 9 superfamily member 2 precursor [Homo sapiens]	TM9SF2	0.140124	1.1	1	0	0	NP_006818.3
13569840	MACRO domain-containing protein 1 [Homo sapiens]	MACROD1	0.140124	1.1	1	0	0	NP_006397.1
59710109	transmembrane protein C3orf1 [Homo sapiens]	TIMMDC1	0.140124	1.1	1	2	0	NP_060962.2
61175258	hypothetical protein LOC388753 [Homo sapiens]	C1orf31	0.140124	1.1	1	0	0	NP_003363.1
150418007	E3 SUMO-protein ligase RanBP2 [Homo sapiens]	RANBP2	0.140124	1.1	2	1	0	NP_001002800.1
52632383	heterogeneous nuclear ribonucleoprotein L isoform a [Homo sapiens]	HNRNPL	0.141433	1.1	0	0	0	NP_001188306.1
156415994	probable U3 small nucleolar RNA-associated protein 11 [Homo sapiens]	UTP11L	0.141433	1.1	1	0	0	NP_009089.4
18105048	histone H2B type 1-K [Homo sapiens]	HIST1H2BK	0.14274	1.1	0	0	0	NP_057131.1
4505061	cation-dependent mannose-6-phosphate receptor precursor [Homo sapiens]	M6PR	0.14274	1.1	1	2	0	NP_057191.2
34932414	non-POU domain-containing octamer-binding protein isoform 1 [Homo sapiens]	NONO	0.14274	1.1	1	0	0	NP_057212.1
11345492	serine racemase [Homo sapiens]	SRR	0.144046	1.11	0	0	0	NP_071435.2
117938765	protein ALEX isoform g [Homo sapiens]	GNAS	0.144046	1.11	0	0	0	NP_001073884.1
[truncated: 906 more rows]

## Sheet: Gorrila
GO term	Description	P-value	FDR q-value	Enrichment (N, B, n, b)	Genes	http://cbl-gorilla.cs.technion.ac.il/GOrilla/h4xn46gl/GOResults.html
GO:0006284	base-excision repair	0.000567	0.0194	9.59 (2532,11,120,5)	[+] Show genes	8/20/12-9/20/12
GO:0006271	DNA strand elongation involved in DNA replication	2.76e-07	1.44e-05	8.51 (2532,17,175,10)	[+] Show genes
GO:0022616	DNA strand elongation	2.76e-07	1.43e-05	8.51 (2532,17,175,10)	[+] Show genes
GO:0006686	sphingomyelin biosynthetic process	0.00033	0.0124	76.73 (2532,2,33,2)	[+] Show genes
GO:0006667	sphinganine metabolic process	0.00033	0.0123	76.73 (2532,2,33,2)	[+] Show genes
GO:0046511	sphinganine biosynthetic process	0.00033	0.0122	76.73 (2532,2,33,2)	[+] Show genes
GO:0006959	humoral immune response	0.000457	0.0164	73.39 (2532,3,23,2)	[+] Show genes
GO:0010639	negative regulation of organelle organization	0.000508	0.0179	6.94 (2532,35,73,7)	[+] Show genes
GO:0032392	DNA geometric change	0.000933	0.0309	6.89 (2532,15,147,6)	[+] Show genes
GO:0006684	sphingomyelin metabolic process	0.000942	0.031	51.15 (2532,3,33,2)	[+] Show genes
GO:0006670	sphingosine metabolic process	0.000942	0.0308	51.15 (2532,3,33,2)	[+] Show genes
GO:0046520	sphingoid biosynthetic process	0.000942	0.0306	51.15 (2532,3,33,2)	[+] Show genes
GO:0046512	sphingosine biosynthetic process	0.000942	0.0305	51.15 (2532,3,33,2)	[+] Show genes
GO:0006446	regulation of translational initiation	4.99e-07	2.51e-05	5.94 (2532,19,269,12)	[+] Show genes
GO:0000289	nuclear-transcribed mRNA poly(A) tail shortening	8.99e-05	0.00363	4.99 (2532,10,406,8)	[+] Show genes
GO:0048608	reproductive structure development	0.000491	0.0175	4.52 (2532,6,560,6)	[+] Show genes
GO:0006260	DNA replication	6.74e-06	0.000297	4.21 (2532,55,175,16)	[+] Show genes
GO:0030330	DNA damage response, signal transduction by p53 class mediator	1.67e-13	2.62e-11	3.48 (2532,41,586,33)	[+] Show genes
GO:0071158	positive regulation of cell cycle arrest	7.1e-12	5.65e-10	3.41 (2532,38,586,30)	[+] Show genes
GO:0031397	negative regulation of protein ubiquitination	2.38e-11	1.79e-09	3.32 (2532,39,586,30)	[+] Show genes
GO:0072331	signal transduction by p53 class mediator	6.23e-12	5.36e-10	3.24 (2532,44,586,33)	[+] Show genes
GO:0061136	regulation of proteasomal protein catabolic process	0.000255	0.00971	3.15 (2532,17,567,12)	[+] Show genes
GO:0042770	signal transduction in response to DNA damage	6.46e-12	5.47e-10	3.14 (2532,45,609,34)	[+] Show genes
GO:0000209	protein polyubiquitination	4.36e-12	3.81e-10	3.11 (2532,50,586,36)	[+] Show genes
GO:0000216	M/G1 transition of mitotic cell cycle	2.3e-16	5.84e-14	3.05 (2532,43,773,40)	[+] Show genes
GO:0031396	regulation of protein ubiquitination	1.35e-10	9.5e-09	3.03 (2532,47,586,33)	[+] Show genes
GO:0002479	antigen processing and presentation of exogenous peptide antigen via MHC class I, TAP-dependent	5.77e-09	3.62e-07	3.02 (2532,40,586,28)	[+] Show genes
GO:0006521	regulation of cellular amino acid metabolic process	2.18e-13	2.9e-11	3.02 (2532,34,788,32)	[+] Show genes
GO:0019884	antigen processing and presentation of exogenous antigen	1.48e-09	9.6e-08	3.01 (2532,43,586,30)	[+] Show genes
GO:0006977	DNA damage response, signal transduction by p53 class mediator resulting in cell cycle arrest	9.66e-13	1.2e-10	2.99 (2532,35,773,32)	[+] Show genes
GO:0072395	signal transduction involved in cell cycle checkpoint	9.66e-13	1.17e-10	2.99 (2532,35,773,32)	[+] Show genes
GO:0072431	signal transduction involved in mitotic cell cycle G1/S transition DNA damage checkpoint	9.66e-13	1.15e-10	2.99 (2532,35,773,32)	[+] Show genes
GO:0072422	signal transduction involved in DNA damage checkpoint	9.66e-13	1.12e-10	2.99 (2532,35,773,32)	[+] Show genes
GO:0072413	signal transduction involved in mitotic cell cycle checkpoint	9.66e-13	1.1e-10	2.99 (2532,35,773,32)	[+] Show genes
GO:0072474	signal transduction involved in mitotic cell cycle G1/S checkpoint	9.66e-13	1.07e-10	2.99 (2532,35,773,32)	[+] Show genes
GO:0072401	signal transduction involved in DNA integrity checkpoint	9.66e-13	1.05e-10	2.99 (2532,35,773,32)	[+] Show genes
GO:0072404	signal transduction involved in G1/S transition checkpoint	9.66e-13	1.03e-10	2.99 (2532,35,773,32)	[+] Show genes
GO:0051352	negative regulation of ligase activity	9.66e-13	1.01e-10	2.99 (2532,35,773,32)	[+] Show genes
GO:0051444	negative regulation of ubiquitin-protein ligase activity	9.66e-13	9.92e-11	2.99 (2532,35,773,32)	[+] Show genes
GO:0051436	negative regulation of ubiquitin-protein ligase activity involved in mitotic cell cycle	9.66e-13	9.73e-11	2.99 (2532,35,773,32)	[+] Show genes
GO:0002478	antigen processing and presentation of exogenous peptide antigen	1.37e-08	8.29e-07	2.95 (2532,41,586,28)	[+] Show genes
GO:0042590	antigen processing and presentation of exogenous peptide antigen via MHC class I	1.37e-08	8.2e-07	2.95 (2532,41,586,28)	[+] Show genes
GO:0051439	regulation of ubiquitin-protein ligase activity involved in mitotic cell cycle	7.31e-13	9.29e-11	2.93 (2532,38,773,34)	[+] Show genes
GO:0051437	positive regulation of ubiquitin-protein ligase activity involved in mitotic cell cycle	2.16e-12	2.09e-10	2.92 (2532,37,773,33)	[+] Show genes
GO:0019882	antigen processing and presentation	6.08e-10	4.11e-08	2.88 (2532,51,586,34)	[+] Show genes
GO:0051340	regulation of ligase activity	1.42e-12	1.4e-10	2.87 (2532,40,773,35)	[+] Show genes
GO:0033238	regulation of cellular amine metabolic process	3.92e-12	3.67e-10	2.87 (2532,37,788,33)	[+] Show genes
GO:0031145	anaphase-promoting complex-dependent proteasomal ubiquitin-dependent protein catabolic process	4.1e-12	3.78e-10	2.86 (2532,39,773,34)	[+] Show genes
GO:0051351	positive regulation of ligase activity	4.1e-12	3.71e-10	2.86 (2532,39,773,34)	[+] Show genes
GO:0051438	regulation of ubiquitin-protein ligase activity	4.1e-12	3.65e-10	2.86 (2532,39,773,34)	[+] Show genes
GO:0051443	positive regulation of ubiquitin-protein ligase activity	1.18e-11	9.27e-10	2.84 (2532,38,773,33)	[+] Show genes
GO:0048002	antigen processing and presentation of peptide antigen	5.25e-09	3.37e-07	2.82 (2532,49,586,32)	[+] Show genes
GO:0002474	antigen processing and presentation of peptide antigen via MHC class I	5.25e-09	3.33e-07	2.82 (2532,49,586,32)	[+] Show genes
GO:0031398	positive regulation of protein ubiquitination	6.66e-12	5.56e-10	2.80 (2532,41,773,35)	[+] Show genes
GO:0006259	DNA metabolic process	2.64e-06	0.000123	2.78 (2532,170,161,30)	[+] Show genes
GO:0051320	S phase	1.28e-14	2.63e-12	2.74 (2532,55,773,46)	[+] Show genes
GO:0000084	S phase of mitotic cell cycle	1.28e-14	2.53e-12	2.74 (2532,55,773,46)	[+] Show genes
GO:0000082	G1/S transition of mitotic cell cycle	1.28e-14	2.44e-12	2.74 (2532,55,773,46)	[+] Show genes
GO:0090068	positive regulation of cell cycle process	8.73e-08	4.8e-06	2.70 (2532,48,586,30)	[+] Show genes
GO:0070646	protein modification by small protein removal	0.000153	0.00602	2.66 (2532,17,783,14)	[+] Show genes
GO:0019941	modification-dependent protein catabolic process	2.71e-12	2.58e-10	2.63 (2532,82,586,50)	[+] Show genes
GO:0006413	translational initiation	3.06e-35	1.63e-31	2.58 (2532,102,932,97)	[+] Show genes
GO:0019083	viral transcription	3.16e-24	4.21e-21	2.57 (2532,73,932,69)	[+] Show genes
GO:0010565	regulation of cellular ketone metabolic process	8.86e-07	4.38e-05	2.56 (2532,49,586,29)	[+] Show genes
GO:0010498	proteasomal protein catabolic process	6.76e-12	5.55e-10	2.55 (2532,55,776,43)	[+] Show genes
GO:0043161	proteasomal ubiquitin-dependent protein catabolic process	6.76e-12	5.47e-10	2.55 (2532,55,776,43)	[+] Show genes
GO:0043632	modification-dependent macromolecule catabolic process	1.92e-11	1.46e-09	2.54 (2532,85,586,50)	[+] Show genes
GO:0006415	translational termination	1.18e-23	1.26e-20	2.54 (2532,75,932,70)	[+] Show genes
GO:0051603	proteolysis involved in cellular protein catabolic process	3.65e-11	2.7e-09	2.51 (2532,86,586,50)	[+] Show genes
GO:0019058	viral infectious cycle	1.85e-21	1.1e-18	2.44 (2532,79,932,71)	[+] Show genes
GO:0043624	cellular protein complex disassembly	4.67e-21	2.49e-18	2.44 (2532,78,932,70)	[+] Show genes
GO:0043241	protein complex disassembly	4.67e-21	2.27e-18	2.44 (2532,78,932,70)	[+] Show genes
GO:0006414	translational elongation	1.08e-22	9.63e-20	2.43 (2532,85,932,76)	[+] Show genes
GO:0000184	nuclear-transcribed mRNA catabolic process, nonsense-mediated decay	2.03e-22	1.55e-19	2.38 (2532,88,941,78)	[+] Show genes
GO:0006511	ubiquitin-dependent protein catabolic process	1.94e-13	2.87e-11	2.30 (2532,79,821,59)	[+] Show genes
GO:0000075	cell cycle checkpoint	1.16e-10	8.25e-09	2.26 (2532,73,783,51)	[+] Show genes
GO:0034623	cellular macromolecular complex disassembly	3.69e-17	1.09e-14	2.25 (2532,87,932,72)	[+] Show genes
GO:0032984	macromolecular complex disassembly	3.69e-17	1.04e-14	2.25 (2532,87,932,72)	[+] Show genes
GO:0070647	protein modification by small protein conjugation or removal	1.02e-16	2.72e-14	2.24 (2532,110,821,80)	[+] Show genes
GO:0048610	cellular process involved in reproduction	3.84e-19	1.46e-16	2.23 (2532,100,932,82)	[+] Show genes
GO:0030833	regulation of actin filament polymerization	0.000394	0.0145	2.21 (2532,21,929,17)	[+] Show genes
GO:0006417	regulation of translation	5.76e-05	0.0024	2.20 (2532,63,549,30)	[+] Show genes
GO:0000278	mitotic cell cycle	1.31e-06	6.14e-05	2.20 (2532,110,450,43)	[+] Show genes
GO:0000956	nuclear-transcribed mRNA catabolic process	6.26e-20	2.57e-17	2.18 (2532,109,950,89)	[+] Show genes
GO:0071156	regulation of cell cycle arrest	1.18e-09	7.8e-08	2.16 (2532,78,783,52)	[+] Show genes
GO:0016567	protein ubiquitination	1.27e-14	2.72e-12	2.15 (2532,86,945,69)	[+] Show genes
GO:0006613	cotranslational protein targeting to membrane	6.68e-15	1.55e-12	2.13 (2532,93,932,73)	[+] Show genes
GO:0006614	SRP-dependent cotranslational protein targeting to membrane	1.47e-14	2.71e-12	2.13 (2532,92,932,72)	[+] Show genes
GO:0006402	mRNA catabolic process	1.02e-18	3.62e-16	2.12 (2532,113,950,90)	[+] Show genes
GO:0045047	protein targeting to ER	4.31e-14	7.67e-12	2.10 (2532,93,932,72)	[+] Show genes
GO:0072599	establishment of protein localization in endoplasmic reticulum	4.31e-14	7.42e-12	2.10 (2532,93,932,72)	[+] Show genes
GO:0016032	viral reproduction	2.35e-20	1.05e-17	2.09 (2532,185,779,119)	[+] Show genes
GO:0031400	negative regulation of protein modification process	2.29e-08	1.3e-06	2.08 (2532,72,810,48)	[+] Show genes
GO:0006401	RNA catabolic process	3.61e-18	1.2e-15	2.07 (2532,121,950,94)	[+] Show genes
GO:0022415	viral reproductive process	7.26e-15	1.61e-12	2.06 (2532,105,936,80)	[+] Show genes
GO:0032446	protein modification by small protein conjugation	2.16e-13	2.96e-11	2.05 (2532,93,945,71)	[+] Show genes
GO:0006612	protein targeting to membrane	5.62e-14	9.37e-12	2.02 (2532,105,932,78)	[+] Show genes
GO:0046606	negative regulation of centrosome cycle	0.000395	0.0144	2,532.00 (2532,1,1,1)	[+] Show genes
GO:0046600	negative regulation of centriole replication	0.000395	0.0143	2,532.00 (2532,1,1,1)	[+] Show genes
GO:0006270	DNA-dependent DNA replication initiation	1.34e-05	0.000579	10.85 (2532,8,175,6)	[+] Show genes
GO:0044265	cellular macromolecule catabolic process	1.68e-29	4.47e-26	1.98 (2532,223,950,166)	[+] Show genes
GO:0071845	cellular component disassembly at cellular level	2.11e-13	3.04e-11	1.96 (2532,112,932,81)	[+] Show genes
GO:0022411	cellular component disassembly	2.11e-13	2.96e-11	1.96 (2532,112,932,81)	[+] Show genes
GO:0009057	macromolecule catabolic process	2.7e-27	4.81e-24	1.92 (2532,236,950,170)	[+] Show genes
GO:0006974	response to DNA damage stimulus	1.86e-08	1.09e-06	1.92 (2532,145,626,69)	[+] Show genes
GO:0043086	negative regulation of catalytic activity	5.24e-06	0.000235	1.88 (2532,97,694,50)	[+] Show genes
GO:0032269	negative regulation of cellular protein metabolic process	1.56e-07	8.49e-06	1.88 (2532,93,824,57)	[+] Show genes
GO:0051248	negative regulation of protein metabolic process	3.11e-07	1.59e-05	1.85 (2532,96,829,58)	[+] Show genes
GO:0022403	cell cycle phase	0.000317	0.012	1.83 (2532,132,450,43)	[+] Show genes
GO:0010467	gene expression	1.07e-21	7.11e-19	1.82 (2532,346,744,185)	[+] Show genes
GO:0072594	establishment of protein localization to organelle	4.13e-08	2.3e-06	1.82 (2532,127,779,71)	[+] Show genes
GO:0006508	proteolysis	1.75e-05	0.000747	1.79 (2532,142,567,57)	[+] Show genes
GO:0010564	regulation of cell cycle process	3.83e-07	1.95e-05	1.75 (2532,106,887,65)	[+] Show genes
GO:0006412	translation	1.41e-11	1.09e-09	1.73 (2532,198,836,113)	[+] Show genes
GO:0044092	negative regulation of molecular function	1.88e-05	0.000795	1.67 (2532,119,788,62)	[+] Show genes
GO:0022414	reproductive process	1.07e-10	7.72e-09	1.65 (2532,188,939,115)	[+] Show genes
GO:0051246	regulation of protein metabolic process	1.45e-05	0.000625	1.63 (2532,233,506,76)	[+] Show genes
GO:0032268	regulation of cellular protein metabolic process	4.26e-06	0.000193	1.61 (2532,227,589,85)	[+] Show genes
GO:0033554	cellular response to stress	0.00019	0.00739	1.61 (2532,219,488,68)	[+] Show genes
GO:0051726	regulation of cell cycle	1.01e-06	4.86e-05	1.59 (2532,156,887,87)	[+] Show genes
GO:0006915	apoptotic process	0.000813	0.0271	1.57 (2532,148,642,59)	[+] Show genes
GO:0043412	macromolecule modification	1.9e-07	1.02e-05	1.56 (2532,331,567,116)	[+] Show genes
GO:0006605	protein targeting	3.93e-06	0.000179	1.56 (2532,170,838,88)	[+] Show genes
GO:0002376	immune system process	0.000223	0.00857	1.56 (2532,151,719,67)	[+] Show genes
GO:0007049	cell cycle	8.18e-05	0.00333	1.54 (2532,156,789,75)	[+] Show genes
GO:0008219	cell death	0.000559	0.0194	1.52 (2532,184,642,71)	[+] Show genes
GO:0016265	death	0.000559	0.0193	1.52 (2532,184,642,71)	[+] Show genes
GO:0016071	mRNA metabolic process	2.26e-08	1.3e-06	1.47 (2532,350,751,153)	[+] Show genes
GO:0006886	intracellular protein transport	5.71e-06	0.000254	1.46 (2532,230,839,111)	[+] Show genes
GO:0044267	cellular protein metabolic process	3.64e-18	1.14e-15	1.44 (2532,593,945,319)	[+] Show genes
GO:0006950	response to stress	1.94e-05	0.000817	1.43 (2532,345,626,122)	[+] Show genes
GO:0010605	negative regulation of macromolecule metabolic process	9.43e-07	4.62e-05	1.43 (2532,226,997,127)	[+] Show genes
GO:0031324	negative regulation of cellular metabolic process	1.07e-06	5.09e-05	1.43 (2532,222,999,125)	[+] Show genes
GO:0022402	cell cycle process	0.000531	0.0185	1.43 (2532,206,776,90)	[+] Show genes
GO:0019538	protein metabolic process	1.64e-15	3.97e-13	1.42 (2532,658,836,309)	[+] Show genes
GO:0044248	cellular catabolic process	6.96e-10	4.64e-08	1.40 (2532,431,879,210)	[+] Show genes
GO:0006464	cellular protein modification process	2.35e-07	1.26e-05	1.40 (2532,305,945,159)	[+] Show genes
GO:0036211	protein modification process	2.35e-07	1.24e-05	1.40 (2532,305,945,159)	[+] Show genes
GO:0009892	negative regulation of metabolic process	3.2e-06	0.000147	1.40 (2532,238,999,131)	[+] Show genes
GO:0032774	RNA biosynthetic process	2.59e-08	1.46e-06	1.39 (2532,356,942,184)	[+] Show genes
GO:0009059	macromolecule biosynthetic process	9.99e-11	7.3e-09	1.38 (2532,533,855,248)	[+] Show genes
GO:0071822	protein complex subunit organization	1.22e-05	0.000536	1.38 (2532,232,996,126)	[+] Show genes
GO:0034645	cellular macromolecule biosynthetic process	2.7e-10	1.85e-08	1.37 (2532,529,855,245)	[+] Show genes
GO:0090304	nucleic acid metabolic process	4.85e-13	6.31e-11	1.35 (2532,781,754,315)	[+] Show genes
GO:0009056	catabolic process	7.83e-09	4.86e-07	1.35 (2532,485,879,228)	[+] Show genes
GO:0016070	RNA metabolic process	1.93e-08	1.12e-06	1.31 (2532,681,754,266)	[+] Show genes
GO:0034621	cellular macromolecular complex subunit organization	0.000981	0.0313	1.30 (2532,229,994,117)	[+] Show genes
GO:0006139	nucleobase-containing compound metabolic process	1.67e-10	1.16e-08	1.27 (2532,934,757,356)	[+] Show genes
GO:0044260	cellular macromolecule metabolic process	1.36e-13	2.21e-11	1.27 (2532,1175,755,445)	[+] Show genes
GO:0048519	negative regulation of biological process	0.00019	0.00735	1.25 (2532,450,891,198)	[+] Show genes
GO:0043170	macromolecule metabolic process	1.7e-13	2.59e-11	1.25 (2532,1225,755,455)	[+] Show genes
GO:0044249	cellular biosynthetic process	9.44e-07	4.58e-05	1.24 (2532,710,878,305)	[+] Show genes
GO:0048523	negative regulation of cellular process	0.000728	0.0244	1.24 (2532,427,891,186)	[+] Show genes
GO:0034641	cellular nitrogen compound metabolic process	8.16e-09	5.01e-07	1.23 (2532,998,802,388)	[+] Show genes
GO:0009058	biosynthetic process	1.15e-06	5.42e-05	1.23 (2532,757,878,322)	[+] Show genes
GO:0010556	regulation of macromolecule biosynthetic process	0.000398	0.0144	1.23 (2532,408,992,197)	[+] Show genes
GO:2000112	regulation of cellular macromolecule biosynthetic process	0.000672	0.0227	1.23 (2532,404,992,194)	[+] Show genes
GO:0006807	nitrogen compound metabolic process	1.7e-08	1.01e-06	1.22 (2532,1002,802,388)	[+] Show genes
GO:0071842	cellular component organization at cellular level	0.000103	0.00415	1.21 (2532,595,932,265)	[+] Show genes
GO:0051171	regulation of nitrogen compound metabolic process	0.000588	0.02	1.21 (2532,463,978,217)	[+] Show genes
GO:0031323	regulation of cellular metabolic process	7.6e-05	0.00312	1.20 (2532,627,981,291)	[+] Show genes
GO:0080090	regulation of primary metabolic process	7.22e-05	0.00299	1.20 (2532,598,981,279)	[+] Show genes
GO:0060255	regulation of macromolecule metabolic process	0.000147	0.00582	1.20 (2532,595,981,276)	[+] Show genes
GO:0071841	cellular component organization or biogenesis at cellular level	0.000493	0.0174	1.19 (2532,615,932,269)	[+] Show genes
GO:0019222	regulation of metabolic process	0.000968	0.0311	1.16 (2532,695,981,312)	[+] Show genes
GO:0044238	primary metabolic process	6.27e-07	3.13e-05	1.12 (2532,1553,824,568)	[+] Show genes
GO:0044237	cellular metabolic process	0.000132	0.00525	1.10 (2532,1580,826,566)	[+] Show genes
